# Supplementary material for: Stereoselective palladium-catalyzed carboetherification of cyclopropenes via a tethering strategy
Source: Royal Society of Chemistry journal article supplement (doi:10.1039/d5sc09351a), 2026-01-01

Supporting Information for

## **“Stereoselective Palladium-Catalyzed Carboetherification of Cyclopropenes via a Tethering Strategy”**

Duncan K. Brownsey, Alexandre A. Schoepfer and Jerome Waser\*

Laboratory of Catalysis and Organic Synthesis, École Polytechnique Fédérale de Lausanne,  
EPFL, SB ISIC LCSO, BCH 4306, 1015 Lausanne (Switzerland)

\*Correspondence to: [jerome.waser@epfl.ch](mailto:jerome.waser@epfl.ch)

# Table of Contents

|                                                                        |     |
|------------------------------------------------------------------------|-----|
| General Information .....                                              | 3   |
| Synthesis of Starting Materials .....                                  | 3   |
| Synthesis of Diazo Compounds .....                                     | 4   |
| Synthesis of alkynes .....                                             | 8   |
| Synthesis of amino cyclopropenes .....                                 | 10  |
| Optimization Studies .....                                             | 19  |
| Procedures and Product Characterization of Cyclopropane Products ..... | 25  |
| Product Modifications .....                                            | 53  |
| DFT Calculations .....                                                 | 58  |
| X-ray Crystallographic Data .....                                      | 60  |
| References .....                                                       | 81  |
| Copies of NMR Spectra .....                                            | 82  |
| Cyclopropenes .....                                                    | 82  |
| Cyclopropane products .....                                            | 100 |
| Product Modifications .....                                            | 164 |
| HPLC Traces .....                                                      | 173 |

## General Information

The NMR spectra were recorded on a Bruker DPX-400 spectrometer at 400 MHz for  $^1\text{H}$ , 101 MHz for  $^{13}\text{C}$ , 376 MHz for  $^{19}\text{F}$ . The chemical shift ( $\delta$ ) for  $^1\text{H}$  and  $^{13}\text{C}$  are given in ppm relative to residual signals of the solvents ( $\text{CDCl}_3$  - 7.26 ppm  $^1\text{H}$  NMR and 77.16 ppm  $^{13}\text{C}$  NMR). Carbon spectra have been measured using broadband  $\{^1\text{H}\}$  decoupling. Coupling constants are given in Hertz. The following abbreviations are used to indicate the multiplicity: s, singlet; d, doublet; q, quartet; m, multiplet; bs, broad signal; app, apparent. Infrared spectra were recorded on a JASCO FT-IR B4100 spectrophotometer with an ATR PRO410-S and a ZnSe prisma and are reported as  $\text{cm}^{-1}$  (w = weak, m = medium, s = strong, br = broad). High resolution mass spectrometric measurements were performed by the mass spectrometry service of ISIC at the EPFL on a MICROMASS (ESI) Q-TOF Ultima API. The raw data obtained from the Q-TOF Waters instrument does not take into account the mass of the electron for the ion, the obtained raw data has been therefore corrected by removing the mass of the electron (5 mDa). The diffraction data for crystal structures were collected by mass spectrometry service of ISIC at the EPFL at low temperature using Cu (323) or Mo (520)  $K_\alpha$  radiation on a Rigaku SuperNova dual system in combination with Atlas type CCD detector. The data reduction and correction were carried out by CrysAlisPro (Rigaku Oxford Diffraction, release 1.171.40.68a, 2019). The solutions and refinements were performed by *SHELXT*<sup>1</sup> and *SHELXL*,<sup>2</sup> respectively. The crystal structures were refined using fullmatrix least-squares based on  $F^2$  with all non-H atoms defined in anisotropic manner. Hydrogen atoms were placed in calculated positions by means of the “riding” model. Yields of isolated products refer to materials of >95% purity as determined by  $^1\text{H}$  NMR.

The authors are indebted to the team of the research support service of ISIC at EPFL, particularly to the NMR, XRay, and the High Resolution Mass Spectrometry Units.

**General Procedures.** All reactions were set up under a nitrogen atmosphere in oven-dried glassware using standard Schlenk techniques, unless otherwise stated. Synthesis grade solvents were used as purchased; anhydrous solvents (THF,  $\text{Et}_2\text{O}$ , Toluene and DCM) were taken from a commercial SPS solvent dispenser ( $\text{H}_2\text{O}$  content < 10 ppm, *Karl-Fischer* titration). Chromatographic purification of products was accomplished using flash chromatography (FC) on SiliaFlash P60 silica gel (230 - 400 mesh) or using Biotage Isolera Spektra One with pre-packaged silica cartridges purchased from Büchi, models: Sepacore or GraceResolve (4 g, 12 g, 25 g, 40 g, 80 g, 120 g). For thin layer chromatography (TLC) analysis throughout this work, Merck silica gel 60 F254 TLC glass plates were employed, using UV light as the visualizing agent and basic aqueous potassium permanganate ( $\text{KMnO}_4$ ) stain solutions, and heat as developing agents. Organic solutions were concentrated under reduced pressure on a Büchi rotatory evaporator. **Determination of Enantiomeric Ratios.** HPLC analysis on chiral stationary phase was performed on an Agilent Acquity instrument using a Daicel CHIRALPAK IB-N5 chiral column. The exact conditions for the analyses are specified within the characterization section. HPLC traces were compared to racemic samples prepared by running the reactions using racemic ligands. Optical rotations were measured on a polarimeter using a 10 cm cell with a Na 589 nm filter. The specific solvents and concentrations (in g/100 mL) are indicated.

**Materials.** Most of the starting materials used in this study are commercial and were purchased in the highest purity available from *Sigma-Aldrich*, *Fluka*, *Alfa Aesar*, *Fluorochem*, *Enamine* and used as received, without further purifications. Tris(dibenzylideneacetone)dipalladium was purchased from *Fluorochem* and recrystallized in 200 mg portions following a reported procedure.<sup>3</sup>

## Synthesis of Starting Materials

# Synthesis of Diazo Compounds

**General procedure A:** Synthesis of  $\alpha$ -aryldiazo compounds.

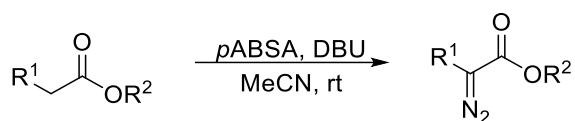

Following a slightly modified procedure,<sup>4</sup> DBU (1.6 equiv.) and the indicated  $\alpha$ -aryl-acetate or were added to a solution of *p*-acetamidobenzenesulfonyl azide (1.5 equiv.) in CH<sub>3</sub>CN (0.5 M) at room temperature and the resulting mixture was stirred for 18 h. The reaction mixture was then diluted with distilled water and extracted with diethyl ether. The combined organic layers were washed with an aqueous solution of 10% NaHCO<sub>3</sub>, brine, then dried over anhydrous Na<sub>2</sub>SO<sub>4</sub>, filtered, and concentrated *in vacuo*. The crude residue was purified by column chromatography with the indicated solvents.

## Methyl 2-diazo-2-phenylacetate (**S1a**)

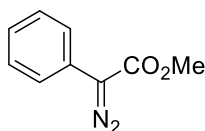

Following general procedure A, starting from methyl phenylacetate (6.50 mL, 46.3 mmol, 1.00 equiv.), the crude residue was purified by flash column chromatography (SiO<sub>2</sub>, 40 g, 3 – 5% Et<sub>2</sub>O in pentane) to afford **S1a** as a red oil (7.00 g, 39.8 mmol, 86%).

TLC: R<sub>f</sub> = 0.88 (SiO<sub>2</sub>, 5% EtOAc in pentane).

<sup>1</sup>H NMR (400 MHz, CDCl<sub>3</sub>)  $\delta$  7.53 – 7.46 (m, 2H, ArH), 7.42 – 7.36 (m, 2H, ArH), 7.23 – 7.14 (m, 1H, ArH), 3.87 (s, 3H, CO<sub>2</sub>CH<sub>3</sub>).

<sup>13</sup>C NMR (101 MHz, CDCl<sub>3</sub>)  $\delta$  165.7, 129.1, 126.0, 125.6, 124.1, 52.1. One carbon is not resolved.

The characterization data correspond to previously reported values.<sup>4</sup>

## Methyl 2-(4-chlorophenyl)-2-diazoacetate (**S1b**)

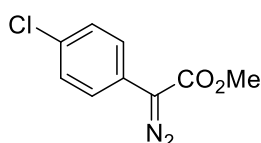

Following general procedure A, starting from methyl 2-(4-chlorophenyl)acetate (2.50 g, 13.5 mmol, 1.00 equiv.), the crude residue was purified by flash column chromatography (SiO<sub>2</sub>, 40 g, 3 – 5% Et<sub>2</sub>O in pentane) to afford **S1b** as an orange solid (2.65, 12.6 mmol, 93%).

TLC: R<sub>f</sub> = 0.58 (SiO<sub>2</sub>, 5% EtOAc in pentane).

<sup>1</sup>H NMR (400 MHz, CDCl<sub>3</sub>)  $\delta$  7.43 – 7.38 (m, 2H, ArH), 7.37 – 7.31 (m, 2H, ArH), 3.86 (s, 3H, CO<sub>2</sub>CH<sub>3</sub>).

<sup>13</sup>C NMR (101 MHz, CDCl<sub>3</sub>)  $\delta$  165.3, 131.6, 129.2, 125.1, 124.2, 52.2. One carbon is not resolved.

The characterization data correspond to previously reported values.<sup>5</sup>



### Methyl 2-diazo-2-(4-methoxyphenyl)acetate (**S1c**)

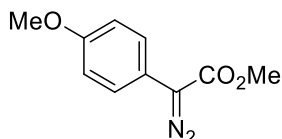

Following general procedure A, starting from methyl 4-methoxyphenylacetate (5.00 mL, 31.5 mmol, 1.00 equiv.), the crude residue was purified by flash column chromatography (SiO<sub>2</sub>, 40 g, 3 – 5% Et<sub>2</sub>O in pentane) to afford **S1c** as a red solid (4.30 g, 20.9 mmol, 66%).

TLC: R<sub>f</sub> = 0.38 (SiO<sub>2</sub>, 10% Et<sub>2</sub>O in pentane).

<sup>1</sup>H NMR (400 MHz, CDCl<sub>3</sub>) δ 7.41 – 7.36 (m, 2H, ArH), 6.96 – 6.92 (m, 2H, ArH), 3.85 (s, 3H, CO<sub>2</sub>CH<sub>3</sub>), 3.81 (s, 3H, ArOCH<sub>3</sub>).

<sup>13</sup>C NMR (101 MHz, CDCl<sub>3</sub>) δ 166.3, 158.2, 126.1, 117.0, 114.8, 55.5, 52.1. One carbon is not resolved.

The characterization data correspond to previously reported values.<sup>4</sup>

### Methyl 4-(1-diazo-2-methoxy-2-oxoethyl)benzoate (**S1d**)

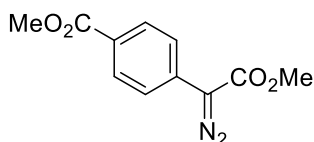

Following general procedure A, starting from methyl 4-(2-methoxy-2-oxoethyl)benzoate (3.00 g, 14.4 mmol, 1.00 equiv.), the crude residue was purified by flash column chromatography (SiO<sub>2</sub>, 40 g, 3 – 5% Et<sub>2</sub>O in pentane) to afford **S1d** as an orange solid (2.30 g, 11.0 mmol, 77%).

TLC: R<sub>f</sub> = 0.29 (SiO<sub>2</sub>, 10% Et<sub>2</sub>O in pentane).

<sup>1</sup>H NMR (400 MHz, CDCl<sub>3</sub>) δ 8.08 – 7.99 (m, 2H, ArH), 7.60 – 7.52 (m, 2H, ArH), 3.91 (s, 3H, CO<sub>2</sub>CH<sub>3</sub>), 3.89 (s, 3H, CO<sub>2</sub>CH<sub>3</sub>).

<sup>13</sup>C NMR (101 MHz, CDCl<sub>3</sub>) δ 166.8, 165.0, 131.2, 130.3, 127.2, 123.1, 52.3, 52.2. One carbon is not resolved.

The characterization data correspond to previously reported values.<sup>6</sup>

### Methyl 2-diazo-2-(p-tolyl)acetate (**S1e**)

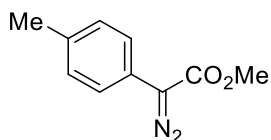

Following general procedure A, starting from methyl p-tolylacetate (2.50, 13.4 mmol, 1.00 equiv.), the crude residue was purified by flash column chromatography (SiO<sub>2</sub>, 40 g, 3 – 5% Et<sub>2</sub>O in pentane) to afford **S1e** as a red solid (1.66 g, 8.73 mmol, 65%).

TLC: R<sub>f</sub> = 0.79 (SiO<sub>2</sub>, 10% EtOAc in pentane).

<sup>1</sup>H NMR (400 MHz, CDCl<sub>3</sub>) δ 7.40 – 7.34 (m, 2H, ArH), 7.23 – 7.16 (m, 2H, ArH), 3.86 (s, 3H, CO<sub>2</sub>CH<sub>3</sub>), 2.35 (s, 3H, ArCH<sub>3</sub>).

$^{13}\text{C}$  NMR (101 MHz,  $\text{CDCl}_3$ )  $\delta$  166.0, 135.9, 129.8, 124.2, 122.2, 63.1, 52.0, 21.1.

The characterization data correspond to previously reported values.<sup>7</sup>

#### Methyl 2-diazo-2-(2-fluorophenyl)acetate (**S1f**)

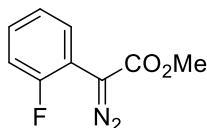

Following general procedure A, starting from methyl 2-fluorophenylacetate (2.02 g, 12.0 mmol, 1.00 equiv.), the crude residue was purified by flash column chromatography ( $\text{SiO}_2$ , 40 g, 3 – 5%  $\text{Et}_2\text{O}$  in pentane) to afford **S1f** as an orange solid (2.04 g, 10.5 mmol, 88%).

TLC:  $R_f$  = 0.77 ( $\text{SiO}_2$ , 10%  $\text{Et}_2\text{O}$  in pentane).

$^1\text{H}$  NMR (400 MHz,  $\text{CDCl}_3$ )  $\delta$  7.69 (td,  $J$  = 7.8, 2.0 Hz, 1H, ArH), 7.25 – 7.15 (m, 2H, ArH), 7.08 (ddd,  $J$  = 11.2, 8.0, 1.7 Hz, 1H, ArH), 3.86 (s, 3H,  $\text{CO}_2\text{CH}_3$ ).

$^{13}\text{C}$  NMR (101 MHz,  $\text{CDCl}_3$ )  $\delta$  165.8, 158.5 (d,  $J_{\text{C-F}}$  = 247.5 Hz), 129.6 (d,  $J_{\text{C-F}}$  = 2.2 Hz), 128.7 (d,  $J_{\text{C-F}}$  = 8.2 Hz), 124.8 (d,  $J_{\text{C-F}}$  = 3.5 Hz), 115.8 (d,  $J_{\text{C-F}}$  = 21.3 Hz), 113.9 (d,  $J_{\text{C-F}}$  = 11.9 Hz), 52.3. One carbon is not resolved.

$^{19}\text{F}$  NMR (376 MHz,  $\text{CDCl}_3$ )  $\delta$  -114.1.

The characterization data correspond to previously reported values.<sup>4</sup>

#### Methyl 2-diazo-2-(3-methoxyphenyl)acetate (**S1g**)

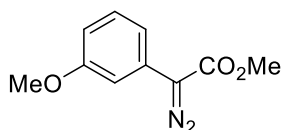

Following general procedure A, starting from methyl 3-methoxyphenylacetate (2.70 g, 15.0 mmol, 1.00 equiv.), the crude residue was purified by flash column chromatography ( $\text{SiO}_2$ , 25 g, 3 – 10%  $\text{Et}_2\text{O}$  in pentane) to afford **S1g** as a red solid (1.96 g, 9.49 mmol, 63%).

TLC:  $R_f$  = 0.54 ( $\text{SiO}_2$ , 5%  $\text{Et}_2\text{O}$  in pentane).

$^1\text{H}$  NMR (400 MHz,  $\text{CDCl}_3$ )  $\delta$  7.29 (t,  $J$  = 8.1 Hz, 1H, ArH), 7.16 (d,  $J$  = 4.3 Hz, 1H, ArH), 6.99 (ddd,  $J$  = 7.9, 1.8, 0.9 Hz, 1H, ArH), 6.73 (ddd,  $J$  = 8.3, 2.5, 0.9 Hz, 1H, ArH), 3.87 (s, 3H,  $\text{CO}_2\text{CH}_3$ ), 3.82 (s, 3H,  $\text{ArOCH}_3$ ).

$^{13}\text{C}$  NMR (101 MHz,  $\text{CDCl}_3$ )  $\delta$  165.7, 160.2, 130.0, 127.1, 116.1, 111.7, 109.8, 55.4, 52.1. One carbon is not resolved.

The characterization data correspond to previously reported values.<sup>7</sup>

#### Methyl 2-(2-chloro-4-fluorophenyl)-2-diazoacetate (**S1h**)

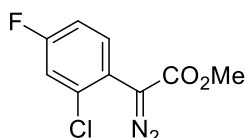

Following general procedure A, starting from methyl 2-chloro-4-fluorophenylacetate (2.43 g, 12.0 mmol, 1.00 equiv.), the crude residue was purified by flash column chromatography ( $\text{SiO}_2$ , 40 g, 3 – 5%  $\text{Et}_2\text{O}$  in pentane) to afford **S1h** as an orange solid (2.40 g, 10.5 mmol, 87%).

TLC:  $R_f = 0.63$  ( $\text{SiO}_2$ , 10%  $\text{Et}_2\text{O}$  in pentane).

$^1\text{H}$  NMR (400 MHz,  $\text{CDCl}_3$ )  $\delta$  7.52 (dd,  $J = 8.8, 5.9$  Hz, 1H, ArH), 7.19 (dd,  $J = 8.4, 2.7$  Hz, 1H, ArH), 7.07 (ddd,  $J = 9.0, 7.9, 2.7$  Hz, 1H, ArH), 3.84 (s, 3H,  $\text{CO}_2\text{CH}_3$ ).

$^{13}\text{C}$  NMR (101 MHz,  $\text{CDCl}_3$ )  $\delta$  166.0, 162.6 (d,  $J_{\text{C-F}} = 252.2$  Hz), 135.1 (d,  $J_{\text{C-F}} = 10.4$  Hz), 133.8 (d,  $J_{\text{C-F}} = 9.0$  Hz), 120.2 (d,  $J_{\text{C-F}} = 3.6$  Hz), 117.5 (d,  $J_{\text{C-F}} = 25.1$  Hz), 115.0 (d,  $J_{\text{C-F}} = 21.7$  Hz), 52.5. One carbon is not resolved.

$^{19}\text{F}$  NMR (376 MHz,  $\text{CDCl}_3$ )  $\delta$  -110.6.

The characterization data correspond to previously reported values.<sup>4</sup>

### Benzyl 2-diazo-2-phenylacetate (**S1i**)

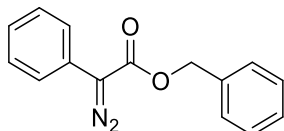

Following general procedure A, starting from benzyl 2-phenylacetate (4.20 mL, 20.4 mmol, 1.00 equiv.), the crude residue was purified by flash column chromatography ( $\text{SiO}_2$ , 80 g, 2% EtOAc in pentane) to afford **S1i** as an orange oil (4.34 g, 25.8 mmol, 85%).

TLC:  $R_f = 0.71$  ( $\text{SiO}_2$ , 5% EtOAc in pentane).

$^1\text{H}$  NMR (400 MHz,  $\text{CDCl}_3$ )  $\delta$  7.55 – 7.47 (m, 2H, ArH), 7.45 – 7.31 (m, 7H, ArH), 7.24 – 7.14 (m, 1H, ArH), 5.34 (s, 2H,  $\text{CH}_2$ ).

$^{13}\text{C}$  NMR (101 MHz,  $\text{CDCl}_3$ )  $\delta$  165.1, 136.0, 129.1, 128.7, 128.5, 128.3, 126.0, 125.5, 124.1, 66.6. One carbon is not resolved.

The characterization data correspond to previously reported values.<sup>8</sup>

### (1-Diazo-2,2,2-trifluoroethyl)benzene (**S1j**)

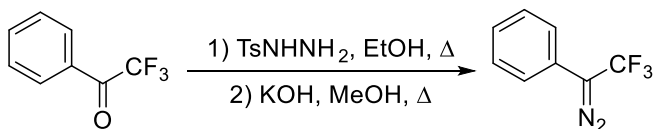

Following a reported procedure,<sup>4</sup> a solution of 2,2,2-trifluoro-1-phenylethanone (10.00 g, 57.43 mmol, 1.000 equiv) and 4-methylbenzenesulfonylhydrazide (10.70 g, 57.43 mmol, 1.000 equiv) in ethanol (150 mL) was heated to reflux for 14 h. The mixture was cooled to rt and concentrated *in vacuo*. The resulting crude precipitate was triturated with pentane (100 mL), filtered, washed with pentane and dried under vacuum to give intermediate N-[(E)-(2,2-dimethyl-1-phenylpropylidene)amino]-4-methylbenzenesulfonamide as an off-white solid (12.05 g, 35.18 mmol, 61% yield) which was used immediately in the next step without further purification.

KOH (1.975 g, 35.20 mmol, 2.000 equiv.) was dissolved in MeOH (60 mL) by stirring at room temperature. Intermediate tosyl hydrazide (6.025 g, 17.60 mmol, 1.000 equiv.) was added in one portion and the solution was heated to reflux for 1 h, then cooled to room temperature. Water (100 mL) was added and the resulting mixture was extracted with pentane (3 x 150 mL). The combined organic layers were dried over anhydrous  $\text{Na}_2\text{SO}_4$ , filtered and concentrated *in vacuo* to give **S1j** (1.124 g, 6.039 mmol, 34% yield) as a red oil, which was used directly without further purification.

$^1\text{H}$  NMR (400 MHz,  $\text{CDCl}_3$ )  $\delta$  7.44 – 7.38 (m, 2H, ArH), 7.24 – 7.17 (m, 1H, ArH), 7.14 – 7.04 (m, 2H, ArH).

$^{13}\text{C}$  NMR (101 MHz,  $\text{CDCl}_3$ )  $\delta$  129.6, 126.1, 125.8 (q,  $J_{\text{C-F}} = 269.2$  Hz), 123.7, 122.4. One carbon is not resolved.

$^{19}\text{F}$  NMR (376 MHz,  $\text{CDCl}_3$ )  $\delta$  -57.4.

The characterization data correspond to previously reported values.<sup>4</sup>

### Ethyl 2-diazopropanoate (**S1k**)

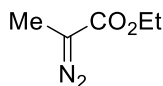

Following general procedure A, starting from ethyl 2-methylacetoacetate (5.00 mL, 35.4 mmol, 1.00 equiv.), the crude residue was purified by flash column chromatography ( $\text{SiO}_2$ , 80 g, 2%  $\text{Et}_2\text{O}$  in pentane) to afford **S1k** as a yellow oil (2.33 g, 18.2 mmol, 52%).

TLC:  $R_f = 0.37$  ( $\text{SiO}_2$ , 10%  $\text{Et}_2\text{O}$  in pentane).

$^1\text{H}$  NMR (400 MHz,  $\text{CDCl}_3$ )  $\delta$  4.22 (q,  $J = 7.1$  Hz, 2H,  $\text{CO}_2\text{CH}_2\text{CH}_3$ ), 1.96 (s, 3H,  $\text{CH}_3$ ), 1.27 (t,  $J = 7.1$  Hz, 3H,  $\text{CO}_2\text{CH}_2\text{CH}_3$ ).

$^{13}\text{C}$  NMR (101 MHz,  $\text{CDCl}_3$ )  $\delta$  168.2, 60.9, 14.7, 8.6. One carbon is not resolved.

The characterization data correspond to previously reported values.<sup>9</sup>

## Synthesis of alkynes

### tert-Butyl benzyl(prop-2-yn-1-yl)carbamate (**S2**)

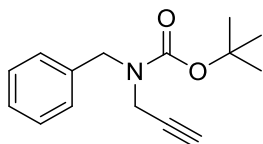

Following a modified procedure,<sup>10</sup> tert-butyl benzylcarbamate (7.986 g, 38.53 mmol, 1.000 equiv.) was dissolved in DMF (45 mL) and cooled to 0 °C with an ice-water bath. NaH (60% in oil dispersion, 1.695 g, 42.38 mmol, 1.100 equiv.) was then added in several portions and the solution was stirred for 30 minutes at 0 °C. A propargyl bromide solution (80% wt/v in toluene, 4.95 mL, 46.2 mmol, 1.20 equiv.) was then added dropwise, and the reaction was warmed to room temperature. After 16 h, the reaction was quenched with aqueous KOH solution (2M, 30 mL), and extracted with EtOAc (4 x 30 mL). The combined organic layers were washed with 10 wt/v LiCl solution (2 x 30 mL), dried over anhydrous  $\text{Na}_2\text{SO}_4$ , and concentrated *in vacuo*. The crude residue was then purified via flash chromatography (70 g  $\text{SiO}_2$ , 5% EtOAc in pentane) to afford **S2** as a colourless oil (8.163 g, 33.28 mmol, 86%).

TLC:  $R_f = 0.54$  ( $\text{SiO}_2$ , 10%  $\text{Et}_2\text{O}$  in pentane).

$^1\text{H}$  NMR (400 MHz,  $\text{CDCl}_3$ )  $\delta$  7.40 – 7.21 (m, 5H, ArH), 4.55 (s, 2H,  $\text{CH}_2$ ), 4.10 – 3.79 (m, 2H,  $\text{CH}_2$ ), 2.21 (t,  $J = 2.5$  Hz, 1H, CC-H), 1.49 (s, 9H,  $\text{C}(\text{CH}_3)_3$ ).

$^{13}\text{C}$  NMR (101 MHz,  $\text{CDCl}_3$ )  $\delta$  155.2, 137.6, 128.7, 127.8, 127.5, 80.7, 79.5, 71.9, 49.4, 35.4, 28.5.

The characterization data correspond to previously reported values.<sup>11</sup>

### ***tert*-Butyl (4-methoxybenzyl)carbamate (**S3**)**

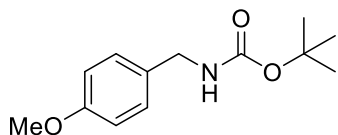

To a round bottom flask containing 4-methoxybenzylamine (4.00 mL, 4.20 g, 30.6 mmol, 1.00 equiv) in DCM (40 mL) was added a solution of di-*tert*-butyl dicarbonate (8.018 g, 36.74 mmol, 1.200 equiv.) in DCM (40 mL) dropwise at 0 °C. The solution was then stirred at room temperature for 16 h, after which the reaction was quenched with water (30 mL) and stirred at room temperature for 30 minutes. The resulting layers were separated and the aqueous fraction was extracted with DCM (3 x 30 mL). The combined organic layers were then dried over anhydrous Na<sub>2</sub>SO<sub>4</sub> and the mixture was concentrated *in vacuo*. The resulting oil then precipitated upon scratching to afford a crude solid which was triturated with heptane (3 x 10 mL) and filtered to afford **S3** as a white solid (4.384 g, 18.47 mmol, 60%).

<sup>1</sup>H NMR (400 MHz, CDCl<sub>3</sub>) δ 7.23 – 7.17 (m, 2H, ArH), 6.88 – 6.83 (m, 2H, ArH), 4.76 (br s, 1H, NH), 4.24 (d, *J* = 5.8 Hz, 2H, CH<sub>2</sub>), 3.80 (s, 3H, ArOCH<sub>3</sub>), 1.46 (s, 9H, C(CH<sub>3</sub>)<sub>3</sub>).

<sup>13</sup>C NMR (101 MHz, CDCl<sub>3</sub>) δ 159.1, 156.0, 131.2, 129.0, 114.1, 79.5, 55.4, 44.3, 28.6.

The characterization data correspond to previously reported values.<sup>12</sup>

### ***tert*-Butyl (4-methoxybenzyl)(prop-2-yn-1-yl)carbamate (**S4**)**

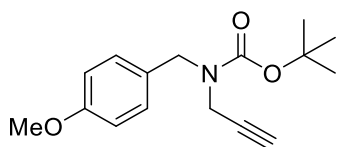

**S3** (4.983 g, 21.00 mmol, 1.000 equiv.) was dissolved in DMF (25 mL) and cooled to 0 °C with an ice-water bath. NaH (60% in oil dispersion, 0.924 g, 23.1 mmol, 1.100 equiv.) was then added portionwise and the solution was stirred for 30 minutes. Propargyl bromide solution (80% wt/v in toluene, 2.70 mL, 25.2 mmol, 1.20 equiv.) was then added dropwise, and the reaction was warmed to room temperature. After 16 h, the reaction was quenched with aqueous KOH (2M, 30 mL), and extracted with EtOAc (3 x 30 mL). The combined organic layers were washed with 10 wt/v LiCl solution (50 mL), and then dried over anhydrous Na<sub>2</sub>SO<sub>4</sub> and concentrated *in vacuo*. The crude residue was then purified via flash chromatography (70 g SiO<sub>2</sub>, 5% EtOAc in pentane) to afford **S4** as a yellow oil (3.540 g, 12.86 mmol, 61%).

TLC: R<sub>f</sub> = 0.45 (SiO<sub>2</sub>, 10% Et<sub>2</sub>O in pentane).

<sup>1</sup>H NMR (400 MHz, CDCl<sub>3</sub>) δ 7.20 (d, *J* = 8.1 Hz, 2H, ArH), 6.90 – 6.82 (m, 2H, ArH), 4.49 (s, 2H, CH<sub>2</sub>), 4.07 – 3.82 (m, 2H, CH<sub>2</sub>), 3.80 (s, 3H, ArOCH<sub>3</sub>), 2.20 (t, *J* = 2.5 Hz, 1H, CC-H), 1.49 (s, 9H, C(CH<sub>3</sub>)<sub>3</sub>).

<sup>13</sup>C NMR (101 MHz, CDCl<sub>3</sub>) δ 159.1, 155.2, 129.6, 129.3, 114.1, 80.6, 79.6, 71.7, 55.4, 48.6, 35.1, 28.5.

The characterization data correspond to previously reported values.<sup>13</sup>

### ***tert*-Butyl methyl(prop-2-yn-1-yl)carbamate (**S5**)**

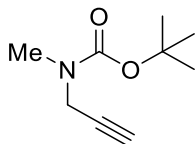

*tert*-Butyl N-methylcarbamate (14.90 g, 71.89 mmol, 1.000 equiv.) was dissolved in DMF (50 mL) and cooled to 0 °C with an ice bath. NaH (60% in oil dispersion, 3.163 g, 79.08 mmol, 1.100 equiv.) was then added and the solution was stirred for 30 minutes. Propargyl bromide solution (80% wt/v in toluene, 9.23 mL, 86.3 mmol, 1.20 equiv.) was then added dropwise, and the reaction was warmed to room temperature. After 16 h, the reaction was quenched with aqueous KOH (2 M, 30 mL), and extracted with EtOAc (3 x 30 mL). The combined organic layers were washed with 10% wt/v LiCl solution (50 mL), and then dried over anhydrous Na<sub>2</sub>SO<sub>4</sub> and concentrated *in vacuo*. The crude residue was then purified via flash chromatography (70 g SiO<sub>2</sub>, 5% EtOAc in pentane) to afford **S5** as a yellow oil (3.412 g, 20.17 mmol, 53%).

TLC: R<sub>f</sub> = 0.75 (SiO<sub>2</sub>, 10% Et<sub>2</sub>O in pentane).

<sup>1</sup>H NMR (400 MHz, CDCl<sub>3</sub>) δ 4.19 – 3.87 (m, 2H), 2.91 (s, 3H), 2.20 (t, *J* = 2.5 Hz, 1H), 1.46 (s, 9H).

<sup>13</sup>C NMR (101 MHz, CDCl<sub>3</sub>) δ 155.4, 80.3, 79.4, 71.7, 37.8, 33.6, 28.5.

The characterization data correspond to previously reported values.<sup>14</sup>

## Synthesis of amino cyclopropenes

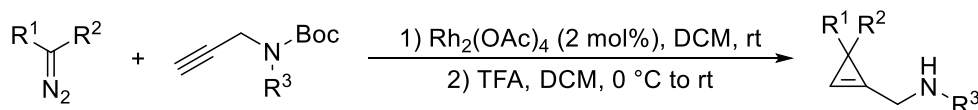

Following a modified procedure,<sup>4</sup> the diazo compound was dissolved in DCM (0.5 M) and added via syringe pump to a suspension of Rh<sub>2</sub>(OAc)<sub>4</sub> (2 mol%) and the alkyne (1.5 equiv.) in DCM (0.5 M) at room temperature over 10 h. After the addition was complete, the reaction mixture was allowed to stir for another 6 hours. The reaction mixture was then concentrated under reduced pressure, and the crude residue was purified by column chromatography.

Boc-protected cyclopropene was then dissolved in DCM (0.5 M) and cooled to 0 °C. Trifluoroacetic acid (8.00 equiv.) was then added and the solution was stirred for 30 minutes at 0 °C, then warmed to room temperature and stirred for an additional hour. The reaction mixture was then concentrated *in vacuo*, adding toluene (5 mL) to help remove residual trifluoroacetic acid. The residue was then suspended in aqueous 1M NaOH (40 mL), and extracted with EtOAc (3 x 40 mL). The combined organic layers were then dried over anhydrous Na<sub>2</sub>SO<sub>4</sub>, filtered and concentrated *in vacuo*. The crude product was then purified by flash column chromatography using the indicated solvents to afford the desired cyclopropene.

### Methyl 2-((benzylamino)methyl)-1-phenylcycloprop-2-ene-1-carboxylate (**3a**)

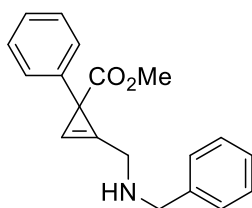

Following general procedure B, starting from diazo **S1a** (2.412 g, 13.69 mmol, 1.000 equiv.), the intermediate product was purified by flash column chromatography (SiO<sub>2</sub>, 80 g, 10 – 20% EtOAc in pentane, R<sub>f</sub> = 0.20 in 10% EtOAc in pentane). A portion of the Boc protected intermediate (3.307 g, 8.405 mmol, 1.000 equiv.) was immediately deprotected in TFA (8.0 equiv.) and DCM (1.0 M), then purified by flash column chromatography (SiO<sub>2</sub>, 40 g, 25 – 55% EtOAc in pentane) to afford **3a** as an orange oil (1.769 g, 6.030 mmol, 45% over both steps).

TLC: R<sub>f</sub> = 0.48 (SiO<sub>2</sub>, 20% EtOAc in DCM).

<sup>1</sup>H NMR (400 MHz, CDCl<sub>3</sub>) δ 7.33 – 7.28 (m, 6H, ArH), 7.26 – 7.19 (m, 4H, ArH), 6.88 (t, J = 1.5 Hz, 1H, C=C-H), 3.90 – 3.75 (m, 4H, CH<sub>2</sub>), 3.70 (s, 3H, CO<sub>2</sub>CH<sub>3</sub>).

<sup>13</sup>C NMR (101 MHz, CDCl<sub>3</sub>) δ 175.7, 141.3, 139.6, 128.6, 128.4, 128.4, 128.3, 127.3, 126.6, 119.7, 99.3, 53.1, 52.3, 43.3, 33.7.

HRMS (nanochip-ESI/LTQ-Orbitrap) m/z: [M + H]<sup>+</sup> Calcd for C<sub>19</sub>H<sub>20</sub>NO<sub>2</sub><sup>+</sup> 294.1489; Found 294.1488.

IR (ν<sub>max</sub>, cm<sup>-1</sup>) 3392 (s), 2985 (s), 2899 (s), 1717 (s), 1451 (w), 1407 (m), 1228 (s), 1053 (s).

### (+)-Methyl 2-((benzylamino)methyl)-1-phenylcycloprop-2-ene-1-carboxylate ((+)-**3a**)

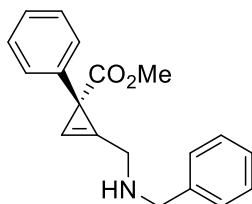

Following a modified version of general procedure B, starting from diazo **S1a** (0.505 g, 2.87 mmol, 1.00 equiv.), using alkyne **S2** (0.985 g, 4.01 mmol, 1.40 equiv.), and tetrakis[(*R*)-(+)-*N*-(p-dodecylphenylsulfonyl)prolinato]dirhodium(II) (Rh<sub>2</sub>(*R*-DOSP)<sub>4</sub>) (32 mg, 0.017 mmol, 0.60 mol%), the intermediate product was purified by flash column chromatography (SiO<sub>2</sub>, 25 g, 10 – 20% EtOAc in pentane, R<sub>f</sub> = 0.20 in 10% EtOAc in pentane). A portion of the Boc protected intermediate (0.400 g, 1.02 mmol, 1.00 equiv.) was immediately deprotected in TFA (0.467 mL, 6.10 mmol, 8.00 equiv.) and DCM (1.0 M), then purified by flash column chromatography (SiO<sub>2</sub>, 40 g, 25 – 55% EtOAc in pentane) to afford (+)-**3a** as an orange oil (148 mg, 0.505 mmol, 20% over both steps). Spectra matched racemic compound. The enantiomeric ratio was determined to be 87:13 by HPLC analysis on a Daicel Chiralpak IB N-5 column: 80:20 hexane/IPA, flow rate 1 mL/min, λ = 254 nm: τ<sub>major</sub> = 8.4 min, τ<sub>minor</sub> = 9.2 min.

[α]<sub>D</sub><sup>20</sup> = 97.4 (c = 2.43 in CHCl<sub>3</sub>, 87:13 e.r.,)

### Methyl 2-((benzylamino)methyl)-1-(4-chlorophenyl)cycloprop-2-ene-1-carboxylate (**3b**)

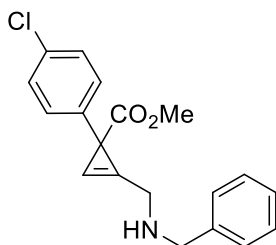

Following general procedure B, starting from diazo **S1b** (2.116 g, 10.05 mmol, 1.000 equiv.), the intermediate product was purified by flash column chromatography (SiO<sub>2</sub>, 80 g, 15% EtOAc in pentane, R<sub>f</sub> = 0.31 in 10% EtOAc in pentane). A portion of the Boc protected intermediate (2.102 g, 4.912 mmol, 1.000 equiv.) was immediately deprotected in TFA (8.0 equiv.) and DCM

(1.0 M), then purified by flash column chromatography (SiO<sub>2</sub>, 25 g, 25 – 60% EtOAc in pentane) to afford **3b** as an orange oil (0.836 g, 2.55 mmol, 26% over both steps).

TLC: R<sub>f</sub> = 0.57 (SiO<sub>2</sub>, 40% EtOAc in pentane).

<sup>1</sup>H NMR (400 MHz, CDCl<sub>3</sub>) δ 7.34 – 7.26 (m, 3H, ArH), 7.26 – 7.20 (m, 6H, ArH), 6.85 (t, *J* = 1.5 Hz, 1H, C=C-H), 3.87 – 3.74 (m, 4H, CH<sub>2</sub>, CH<sub>2</sub>), 3.69 (s, 3H, CO<sub>2</sub>CH<sub>3</sub>).

<sup>13</sup>C NMR (101 MHz, CDCl<sub>3</sub>) δ 175.3, 139.9, 139.5, 132.4, 129.9, 128.6, 128.4, 128.4, 127.4, 119.5, 98.9, 53.1, 52.4, 43.2, 33.1.

HRMS (nanochip-ESI/LTQ-Orbitrap) *m/z*: [M + H]<sup>+</sup> Calcd for C<sub>19</sub>H<sub>19</sub>ClNO<sub>2</sub><sup>+</sup> 328.1099; Found 328.1102.

IR (ν<sub>max</sub>, cm<sup>-1</sup>) 3409 (m), 2946 (w), 2843 (w), 1718 (s), 1492 (m), 1455 (m), 1288 (m), 1223 (s), 1092 (m), 1031 (m), 1014 (m).

### Methyl 2-((benzylamino)methyl)-1-(4-methoxyphenyl)cycloprop-2-ene-1-carboxylate (**3c**)

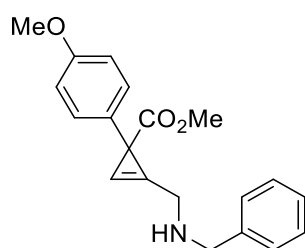

Following general procedure B, starting from diazo **S1c** (1.498 g, 7.265 mmol, 1.000 equiv.), the intermediate product was purified by flash column chromatography (SiO<sub>2</sub>, 80 g, 10 – 20% EtOAc in pentane, R<sub>f</sub> = 0.17 in 30% Et<sub>2</sub>O in pentane). A portion of the Boc protected intermediate (1.458 g, 3.443 mmol, 1.000 equiv.) was immediately deprotected in TFA (8.0 equiv.) and DCM (1.0 M), then purified by flash column chromatography (SiO<sub>2</sub>, 40 g, 25 – 55% EtOAc in pentane) to afford **3c** as an orange oil (0.830 g, 2.57 mmol, 34% over both steps).

TLC: R<sub>f</sub> = 0.29 (SiO<sub>2</sub>, 50% EtOAc in pentane).

<sup>1</sup>H NMR (400 MHz, CDCl<sub>3</sub>) δ 7.35 – 7.27 (m, 2H, ArH), 7.26 – 7.17 (m, 5H, ArH), 6.87 (t, *J* = 1.5 Hz, 1H, C=C-H), 6.85 – 6.81 (m, 2H, ArH), 3.88 – 3.75 (m, 4H, CH<sub>2</sub>, CH<sub>2</sub>), 3.79 (s, 3H, OCH<sub>3</sub>), 3.69 (s, 3H, CO<sub>2</sub>CH<sub>3</sub>).

<sup>13</sup>C NMR (101 MHz, CDCl<sub>3</sub>) δ 176.0, 158.4, 139.7, 133.5, 129.5, 128.6, 128.4, 127.3, 120.0, 113.7, 99.4, 55.4, 53.1, 52.3, 43.4, 33.0.

HRMS (APCI/QTOF) *m/z*: [M + H]<sup>+</sup> Calcd for C<sub>20</sub>H<sub>22</sub>NO<sub>3</sub><sup>+</sup> 324.1594; Found 324.1592.

IR (ν<sub>max</sub>, cm<sup>-1</sup>) 3354 (m), 2944 (w), 2838 (w), 1716 (s), 1612 (w), 1513 (s), 1457 (m), 1247 (s), 1029 (s), 843 (m).

### Methyl 4-(2-((benzylamino)methyl)-1-(methoxycarbonyl)cycloprop-2-en-1-yl)benzoate (**3d**)



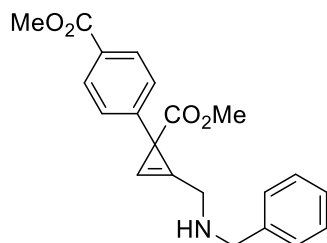

Following general procedure B, starting from diazo **S1d** (1.501 g, 6.408 mmol, 1.000 equiv.), the intermediate product was purified by flash column chromatography (SiO<sub>2</sub>, 80 g, 20% EtOAc in pentane,  $R_f$  = 0.28 in 20% EtOAc in pentane). A portion of the Boc protected intermediate (0.948 g, 2.10 mmol, 1.00 equiv.) was immediately deprotected in TFA (8.0 equiv.) and DCM (1.0 M), then purified by flash column chromatography (SiO<sub>2</sub>, 25 g, 25 – 60% EtOAc in pentane) to afford **3d** as a yellow oil (0.217 g, 0.614 mmol, 10% over both steps).

TLC:  $R_f$  = 0.07 (SiO<sub>2</sub>, 50% Et<sub>2</sub>O in pentane).

<sup>1</sup>H NMR (400 MHz, CDCl<sub>3</sub>)  $\delta$  7.99 – 7.93 (m, 2H, ArH), 7.39 – 7.34 (m, 2H, ArH), 7.32 – 7.27 (m, 2H, ArH), 7.27 – 7.26 (m, 1H, ArH), 7.26 – 7.22 (m, 2H, ArH), 6.89 (t,  $J$  = 1.5 Hz, 1H, C=C-H), 3.90 (s, 3H, CO<sub>2</sub>CH<sub>3</sub>), 3.88 – 3.76 (m, 4H, CH<sub>2</sub>, CH<sub>2</sub>), 3.70 (s, 3H, CO<sub>2</sub>CH<sub>3</sub>).

<sup>13</sup>C NMR (101 MHz, CDCl<sub>3</sub>)  $\delta$  174.9, 167.1, 146.5, 139.1, 129.6, 128.6, 128.5, 128.4, 128.4, 127.5, 118.9, 99.1, 53.0, 52.4, 52.2, 43.0, 33.7.

HRMS (ESI/QTOF)  $m/z$ : [M + H]<sup>+</sup> Calcd for C<sub>21</sub>H<sub>22</sub>NO<sub>4</sub><sup>+</sup> 352.1543; Found 352.1542.

IR ( $\nu_{\max}$ , cm<sup>-1</sup>) 3432 (m), 2942 (m), 2844 (m), 1720 (s), 1435 (m), 1281 (s), 1116 (s), 996 (s).

### Methyl 2-((benzylamino)methyl)-1-(p-tolyl)cycloprop-2-ene-1-carboxylate (**3e**)

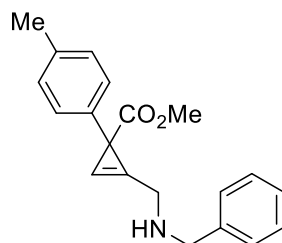

Following general procedure B, starting from diazo **S1e** (1.522 g, 8.002 mmol, 1.000 equiv.), the intermediate product was purified by flash column chromatography (SiO<sub>2</sub>, 80 g, 10 – 20% EtOAc in pentane,  $R_f$  = 0.38 in 10% Et<sub>2</sub>O in pentane). A portion of the Boc protected intermediate (1.126 g, 2.763 mmol, 1.000 equiv.) was immediately deprotected in TFA (8.0 equiv.) and DCM (1.0 M), then purified by flash column chromatography (SiO<sub>2</sub>, 25 g, 20 – 60% EtOAc in pentane) to afford **3e** as an orange oil (0.521 g, 1.70 mmol, 22% over both steps).

TLC:  $R_f$  = 0.28 (SiO<sub>2</sub>, 20% EtOAc in pentane).

<sup>1</sup>H NMR (400 MHz, CDCl<sub>3</sub>)  $\delta$  7.35 – 7.27 (m, 2H, ArH), 7.26 – 7.22 (m, 3H, ArH), 7.20 – 7.15 (m, 2H, ArH), 7.11 (d,  $J$  = 8.1 Hz, 2H, ArH), 6.87 (t,  $J$  = 1.5 Hz, 1H, C=C-H), 3.89 – 3.75 (m, 4H, CH<sub>2</sub>, CH<sub>2</sub>), 3.69 (s, 3H, CO<sub>2</sub>CH<sub>3</sub>), 2.33 (s, 3H, ArCH<sub>3</sub>).

<sup>13</sup>C NMR (101 MHz, CDCl<sub>3</sub>)  $\delta$  175.9, 139.7, 138.3, 136.3, 129.0, 128.6, 128.4, 128.3, 127.3, 119.8, 99.4, 53.1, 52.3, 43.4, 33.4, 21.2.

HRMS (ESI/QTOF)  $m/z$ : [M + H]<sup>+</sup> Calcd for C<sub>20</sub>H<sub>22</sub>NO<sub>2</sub><sup>+</sup> 308.1645; Found 308.1648.

IR ( $\nu_{\max}$ , cm<sup>-1</sup>) 3332 (w), 3130 (w), 3032 (w), 2946 (w), 1715 (s), 1513 (m), 1453 (m), 1286 (m), 1224 (s), 1207 (s), 1030 (m).

**Methyl 2-((benzylamino)methyl)-1-(2-fluorophenyl)cycloprop-2-ene-1-carboxylate (3f)**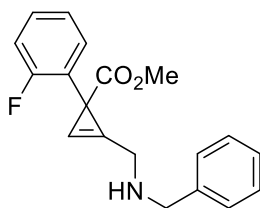

Following general procedure B, starting from diazo **S1f** (1.165 g, 6.000 mmol, 1.000 equiv.), the intermediate product was purified by flash column chromatography (SiO<sub>2</sub>, 80 g, 10 – 20% EtOAc in pentane, *R<sub>f</sub>* = 0.68 in 20% EtOAc in pentane). A portion of the Boc protected intermediate (0.874 g, 1.86 mmol, 1.00 equiv.) was immediately deprotected in TFA (8.00 equiv.) and DCM (1.0 M), then purified by flash column chromatography (SiO<sub>2</sub>, 25 g, 10 – 50% EtOAc in pentane) to afford **3f** as a yellow oil (0.710 g, 2.28 mmol, 39% over both steps).

TLC: *R<sub>f</sub>* = 0.35 (SiO<sub>2</sub>, 25% EtOAc in pentane).

<sup>1</sup>H NMR (400 MHz, CDCl<sub>3</sub>) δ 7.35 – 7.23 (m, 6H, ArH), 7.19 (dd, *J* = 8.5, 6.1 Hz, 1H, ArH), 7.09 (dd, *J* = 8.5, 2.6 Hz, 1H, ArH), 6.96 (d, *J* = 1.4 Hz, 1H, C=C-H), 6.95 – 6.89 (m, 1H, ArH), 3.99 – 3.76 (m, 5H, CH<sub>2</sub>, CH<sub>2</sub>), 3.66 (s, 3H, CO<sub>2</sub>CH<sub>3</sub>).

<sup>13</sup>C NMR (101 MHz, CDCl<sub>3</sub>) δ 175.0, 161.7 (d, *J*<sub>C-F</sub> = 249.0 Hz), 139.5, 136.3 (d, *J*<sub>C-F</sub> = 3.7 Hz), 135.9 (d, *J*<sub>C-F</sub> = 10.4 Hz), 131.4 (d, *J*<sub>C-F</sub> = 8.8 Hz), 128.6, 128.4, 127.4, 120.6, 116.8 (d, *J*<sub>C-F</sub> = 24.6 Hz), 114.3 (d, *J*<sub>C-F</sub> = 21.1 Hz), 100.3, 53.1, 52.6, 43.6, 32.7.

<sup>19</sup>F NMR (376 MHz, CDCl<sub>3</sub>) δ -113.13 – -113.24 (m).

HRMS (ESI/QTOF) *m/z*: [M + H]<sup>+</sup> Calcd for C<sub>19</sub>H<sub>19</sub>FNO<sub>2</sub><sup>+</sup> 312.1394; Found 312.1396.

IR (ν<sub>max</sub>, cm<sup>-1</sup>) 3337 (m), 3138 (m), 2987 (m), 2954 (m), 2900 (m), 1720 (s), 1491 (s), 1453 (s), 1296 (m), 1256 (s), 1227 (s), 1122 (m), 828 (m), 759 (s).

**Methyl 2-((benzylamino)methyl)-1-(3-methoxyphenyl)cycloprop-2-ene-1-carboxylate (3g)**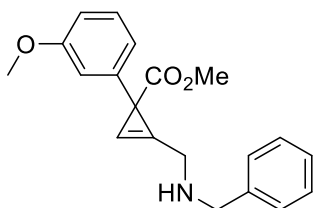

Following general procedure B, starting from diazo **S1g** (1.237 g, 6.000 mmol, 1.000 equiv.), the intermediate product was purified by flash column chromatography (SiO<sub>2</sub>, 80 g, 10 – 35% Et<sub>2</sub>O in pentane, *R<sub>f</sub>* = 0.20 in 20% EtOAc in pentane). A portion of the Boc protected intermediate (0.852 g, 2.01 mmol, 1.00 equiv.) was immediately deprotected in TFA (8.00 equiv.) and DCM (1.0 M), then purified by flash column chromatography (SiO<sub>2</sub>, 25 g, 20 – 60% EtOAc in pentane) to afford **3g** as an orange oil (0.442 g, 1.37 mmol, 68% over both steps).

TLC: *R<sub>f</sub>* = 0.13 (SiO<sub>2</sub>, 20% EtOAc in pentane)

<sup>1</sup>H NMR (400 MHz, CDCl<sub>3</sub>) δ 7.37 – 7.30 (m, 2H, ArH), 7.28 – 7.21 (m, 4H, ArH), 6.93 – 6.84 (m, 3H, ArH, C=C-H), 6.80 (ddd, *J* = 8.2, 2.6, 0.9 Hz, 1H, ArH), 3.91 – 3.77 (m, 4H, CH<sub>2</sub>, CH<sub>2</sub>), 3.81 (s, 3H, ArOCH<sub>3</sub>), 3.72 (s, 3H, CO<sub>2</sub>CH<sub>3</sub>).

<sup>13</sup>C NMR (101 MHz, CDCl<sub>3</sub>) δ 175.6, 159.6, 143.0, 139.7, 129.3, 128.6, 128.4, 127.3, 120.8, 119.6, 114.4, 112.0, 99.3, 55.3, 53.2, 52.3, 43.4, 33.7.

HRMS (ESI/QTOF)  $m/z$ :  $[M + H]^+$  Calcd for  $C_{20}H_{22}NO_3^+$  324.1594; Found 324.1601.

IR ( $\nu_{\max}$ ,  $cm^{-1}$ ) 3325 (m), 3131 (m), 2959 (s), 2905 (s), 1717 (s), 1603 (m), 1583 (m), 1490 (m), 1454 (m), 1433 (m), 1290 (m), 1236 (s), 1047 (s), 767 (m).

**Methyl 2-((benzylamino)methyl)-1-(2-chloro-4-fluorophenyl)cycloprop-2-ene-1-carboxylate (3h)**

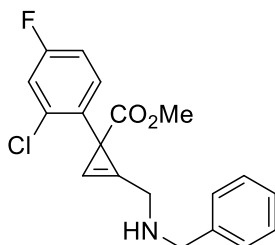

Following general procedure B, starting from diazo **S1h** (1.829 g, 8.000 mmol, 1.000 equiv.), the intermediate product was purified by flash column chromatography ( $SiO_2$ , 40 g, 15 – 35% EtOAc in pentane,  $R_f$  = 0.29 in 20% Et<sub>2</sub>O in pentane). A portion of the Boc protected intermediate (1.490 g, 3.341 mmol, 1.000 equiv.) was immediately deprotected in TFA (8.0 equiv.) and DCM (1.0 M), then purified by flash column chromatography ( $SiO_2$ , 25 g, 20 – 60% EtOAc in pentane) to afford **3h** as an orange oil (0.519 g, 1.50 mmol, 19% over both steps).

TLC:  $R_f$  = 0.34 ( $SiO_2$ , 25% EtOAc in pentane).

$^1H$  NMR (400 MHz,  $CDCl_3$ )  $\delta$  7.34 – 7.26 (m, 5H, ArH), 7.19 (dd,  $J$  = 8.5, 6.0 Hz, 1H, ArH), 7.09 (dd,  $J$  = 8.5, 2.6 Hz, 1H, ArH), 6.95 (t,  $J$  = 1.5 Hz, 1H, C=C-H), 6.92 (dd,  $J$  = 8.3, 2.6 Hz, 1H, ArH), 3.94 (dd,  $J$  = 17.1, 1.5 Hz, 1H,  $CH_2$ ), 3.86 (dd,  $J$  = 14.0, 1.5 Hz, 1H,  $CH_2$ ), 3.85 (d,  $J$  = 13.2 Hz, 1H,  $CH_2$ ), 3.80 (d,  $J$  = 13.0 Hz, 1H,  $CH_2$ ), 3.66 (s, 3H,  $CO_2CH_3$ ).

$^{13}C$  NMR (101 MHz,  $CDCl_3$ )  $\delta$  175.1, 161.7 (d,  $J_{C-F}$  = 249.1 Hz), 139.6, 136.3 (d,  $J_{C-F}$  = 3.6 Hz), 135.9 (d,  $J_{C-F}$  = 10.4 Hz), 131.4 (d,  $J_{C-F}$  = 8.8 Hz), 128.6, 128.4, 127.3, 120.7, 116.9 (d,  $J_{C-F}$  = 24.8 Hz), 114.3 (d,  $J_{C-F}$  = 20.9 Hz), 100.2, 53.2, 52.6, 43.7, 32.7.

$^{19}F$  NMR (376 MHz,  $CDCl_3$ )  $\delta$  -116.4 – -116.5 (m).

HRMS (nanochip-ESI/LTQ-Orbitrap)  $m/z$ :  $[M + H]^+$  Calcd for  $C_{19}H_{18}ClFNO_2^+$  346.1005; Found 346.1006.

IR ( $\nu_{\max}$ ,  $cm^{-1}$ ) 3331 (w), 3039 (w), 2951 (w), 2822 (w), 1723 (s), 1602 (m), 1490 (m), 1258 (s), 1228 (s), 1052 (m).

**Benzyl 2-((benzylamino)methyl)-1-phenylcycloprop-2-ene-1-carboxylate (3i)**

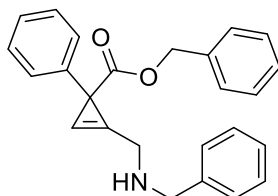

Following general procedure B, starting from diazo **S1i** (1.986 g, 7.871 mmol, 1.000 equiv.), the intermediate product was purified by flash column chromatography ( $SiO_2$ , 80 g, 10 – 20% EtOAc in pentane,  $R_f$  = 0.29 in 10% EtOAc in pentane). A portion of the Boc protected intermediate (0.874 g, 1.86 mmol, 1.00 equiv.) was immediately deprotected in TFA (8.00 equiv.) and DCM (1.0 M), then purified by flash column chromatography ( $SiO_2$ , 25 g, 20 – 60% EtOAc in pentane) to afford **3i** as an orange oil (0.485 g, 1.313 mmol, 53% over both steps).

TLC:  $R_f = 0.25$  (SiO<sub>2</sub>, 20% EtOAc in pentane).

<sup>1</sup>H NMR (400 MHz, CDCl<sub>3</sub>)  $\delta$  7.34 – 7.26 (m, 11H, ArH), 7.26 – 7.18 (m, 4H, ArH), 6.88 (t,  $J = 1.5$  Hz, 1H, C=C-H), 5.15 (s, 2H, CO<sub>2</sub>CH<sub>2</sub>-Ar), 3.83 – 3.80 (m, 2H, CH<sub>2</sub>), 3.79 – 3.70 (m, 2H, CH<sub>2</sub>).

<sup>13</sup>C NMR (101 MHz, CDCl<sub>3</sub>)  $\delta$  174.9, 141.2, 139.6, 136.5, 128.6, 128.6, 128.4, 128.4, 128.2, 128.1, 128.0, 127.3, 126.6, 119.5, 99.2, 66.6, 53.1, 43.3, 33.8.

HRMS (ESI/QTOF)  $m/z$ :  $[M + H]^+$  Calcd for C<sub>25</sub>H<sub>24</sub>NO<sub>2</sub><sup>+</sup> 370.1802; Found 370.1812.

IR ( $\nu_{\max}$ , cm<sup>-1</sup>) 3334 (w), 3134 (w), 3061 (m), 3029 (m), 2938 (w), 1717 (s), 1602 (w), 1496 (m), 1452 (m), 1281 (m), 1209 (s), 1008 (m), 826 (m), 739 (s).

### **N-Benzyl-1-(3-phenyl-3-(trifluoromethyl)cycloprop-1-en-1-yl)methanamine (3j)**

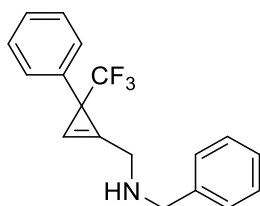

Following general procedure B, starting from diazo **S1j** (1.024 g, 5.501 mmol, 1.000 equiv.), the intermediate product was purified by flash column chromatography (SiO<sub>2</sub>, 100 g, 5% Et<sub>2</sub>O in pentane,  $R_f = 0.21$  in 5% Et<sub>2</sub>O in pentane). A portion of the Boc protected intermediate (0.954 g, 2.36 mmol, 1.00 equiv.) was immediately deprotected in TFA (8.00 equiv.) and DCM (1.0 M), then purified by flash column chromatography (SiO<sub>2</sub>, 12 g, 20 – 50% EtOAc in pentane) to afford **3j** as a clear oil (0.555 g, 1.89 mmol, 35% over both steps).

TLC:  $R_f = 0.23$  (SiO<sub>2</sub>, 20% Et<sub>2</sub>O in pentane).

<sup>1</sup>H NMR (400 MHz, CDCl<sub>3</sub>)  $\delta$  7.36 – 7.21 (m, 10H, ArH), 6.91 (h,  $J = 1.6$  Hz, 1H, C=C-H), 3.91 – 3.69 (m, 4H, CH<sub>2</sub>, CH<sub>2</sub>).

<sup>13</sup>C NMR (101 MHz, CDCl<sub>3</sub>)  $\delta$  139.5, 138.5, 128.6, 128.6, 128.4, 127.9 (q,  $J_{C-F} = 1.2$  Hz), 127.4, 127.3, 126.7 (d,  $J_{C-F} = 277.6$  Hz), 119.6 (q,  $J_{C-F} = 2.1$  Hz), 99.5 (q,  $J_{C-F} = 3.1$  Hz), 53.2, 43.2, 32.36 (q,  $J_{C-F} = 35.3$  Hz).

<sup>19</sup>F NMR (376 MHz, CDCl<sub>3</sub>)  $\delta$  -64.6.

HRMS (ESI/QTOF)  $m/z$ :  $[M + H]^+$  Calcd for C<sub>18</sub>H<sub>17</sub>F<sub>3</sub>N<sup>+</sup> 304.1308; Found 304.1310.

IR ( $\nu_{\max}$ , cm<sup>-1</sup>) 3332 (w), 3138 (w), 3064 (w), 3030 (w), 2818 (w), 1496 (w), 1453 (m), 1301 (m), 1159 (s), 1121 (s), 909 (m), 740 (m).

### **Methyl 2-(((4-methoxybenzyl)amino)methyl)-1-phenylcycloprop-2-ene-1-carboxylate (3k)**

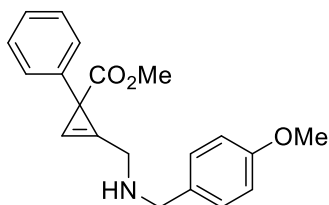

Following general procedure B, starting from diazo **S1a** (1.409 g, 8.000 mmol, 1.000 equiv.), and alkyne **S4** (2.753 g, 10.00 mmol, 1.250 equiv.) the intermediate product was purified by flash column chromatography (SiO<sub>2</sub>, 80 g, 10 – 20% EtOAc in pentane,  $R_f = 0.24$  in 20% Et<sub>2</sub>O

in pentane). A portion of the Boc protected intermediate (1.802 g, 4.255 mmol, 1.000 equiv.) was immediately deprotected in TFA (8.00 equiv.) and DCM (1.0 M), then purified by flash column chromatography (SiO<sub>2</sub>, 12 g, 25 – 55% EtOAc in pentane) to afford **3k** as an orange oil (0.813 g, 2.52 mmol, 31% over both steps).

TLC: R<sub>f</sub> = 0.17 (SiO<sub>2</sub>, 30% EtOAc in pentane).

<sup>1</sup>H NMR (400 MHz, CDCl<sub>3</sub>) δ 7.34 – 7.26 (m, 4H, ArH), 7.25 – 7.20 (m, 1H, ArH), 7.18 – 7.11 (m, 2H, ArH), 6.88 (t, *J* = 1.5 Hz, 1H, C=C-H), 6.86 – 6.79 (m, 2H, ArH), 3.87 – 3.76 (m, 2H, CH<sub>2</sub>), 3.79 (s, 3H, ArOCH<sub>3</sub>), 3.77 – 3.68 (m, 5H, CH<sub>2</sub>, CO<sub>2</sub>CH<sub>3</sub>).

<sup>13</sup>C NMR (101 MHz, CDCl<sub>3</sub>) δ 175.7, 158.9, 141.3, 131.7, 129.6, 128.4, 128.3, 126.6, 119.7, 113.9, 99.2, 55.4, 52.5, 52.3, 43.2, 33.7.

HRMS (ESI/QTOF) *m/z*: [M + Na]<sup>+</sup> Calcd for C<sub>20</sub>H<sub>21</sub>NNaO<sub>3</sub><sup>+</sup> 346.1414; Found 346.1421.

IR (ν<sub>max</sub>, cm<sup>-1</sup>) 3331 (w), 3131 (w), 2984 (s), 2904 (s), 1716 (s), 1611 (w), 1512 (m), 1447 (m), 1290 (m), 1245 (s), 1229 (s), 1178 (m), 1104 (m), 1070 (s), 1040 (s), 823 (m), 765 (m).

### Methyl 2-((methylamino)methyl)-1-phenylcycloprop-2-ene-1-carboxylate (**3l**)

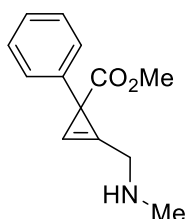

Following general procedure B, starting from diazo **S1a** (2.005 g, 11.38 mmol, 1.000 equiv.), and alkyne **S5** (2.407 g, 14.23 mmol, 1.250 equiv.) the intermediate product was purified by flash column chromatography (SiO<sub>2</sub>, 80 g, 10 – 20% EtOAc in pentane, R<sub>f</sub> = 0.19 in 20% Et<sub>2</sub>O in pentane). A portion of the Boc protected intermediate (1.092 g, 3.440 mmol, 1.000 equiv.) was immediately deprotected in TFA (8.00 equiv.) and DCM (1.0 M), then purified by flash column chromatography (SiO<sub>2</sub>, 25 g, 40 – 100% EtOAc in DCM) to afford **3l** as an orange oil (0.258 g, 1.19 mmol, 15% over both steps).

TLC: R<sub>f</sub> = 0.06 (SiO<sub>2</sub>, EtOAc).

<sup>1</sup>H NMR (400 MHz, CDCl<sub>3</sub>) δ 7.33 – 7.26 (m, 4H, ArH), 7.24 – 7.18 (m, 1H, ArH), 6.87 (t, *J* = 1.5 Hz, 1H, C=C-H), 3.85 – 3.72 (m, 2H, CH<sub>2</sub>), 3.69 (s, 3H, CO<sub>2</sub>CH<sub>3</sub>), 2.46 (s, 3H, NHCH<sub>3</sub>).

<sup>13</sup>C NMR (101 MHz, CDCl<sub>3</sub>) δ 175.7, 141.3, 128.3, 128.3, 126.6, 119.5, 99.1, 52.3, 46.0, 36.1, 33.6.

HRMS (ESI/QTOF) *m/z*: [M + H]<sup>+</sup> Calcd for C<sub>13</sub>H<sub>16</sub>NO<sub>2</sub><sup>+</sup> 218.1176; Found 218.1176.

IR (ν<sub>max</sub>, cm<sup>-1</sup>) 3330 (w), 3131 (w), 2984 (s), 2901 (s), 2787 (w), 1715 (s), 1493 (m), 1437 (m), 1283 (m), 1224 (s), 1071 (s), 1042 (s), 890 (w), 824 (w), 766 (m).

### Methyl 2-((benzylamino)methyl)-1-methylcycloprop-2-ene-1-carboxylate (**3m**)

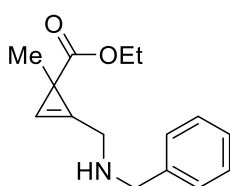

Following general procedure B, starting from diazo **S1k** (1.025 g, 8.000 mmol, 1.000 equiv.), the intermediate product was purified by flash column chromatography (SiO<sub>2</sub>, 40 g, 10 – 20% Et<sub>2</sub>O in pentane, R<sub>f</sub> = 0.30 in 20% Et<sub>2</sub>O in pentane). A portion of the Boc protected intermediate (0.190 g, 0.573 mmol, 1.00 equiv.) was immediately deprotected in TFA (8.00 equiv.) and DCM (1.0 M), then purified by flash column chromatography (SiO<sub>2</sub>, 4 g, 20 – 50% EtOAc in pentane) to afford **3m** as a clear oil (82 mg, 0.36 mmol, 4% over both steps).

TLC: R<sub>f</sub> = 0.07 (SiO<sub>2</sub>, 20% Et<sub>2</sub>O in pentane).

<sup>1</sup>H NMR (400 MHz, CDCl<sub>3</sub>) δ 7.33 (s, 4H, ArH), 7.30 – 7.22 (m, 1H, ArH), 6.64 (s, 1H, C=C-H), 4.15 – 4.02 (m, 2H, CO<sub>2</sub>CH<sub>2</sub>CH<sub>3</sub>), 3.87 (s, 2H, ArCH<sub>2</sub>), 3.74 (d, J = 1.5 Hz, 2H, C=C-CH<sub>2</sub>), 1.40 (s, 3H, CH<sub>3</sub>), 1.22 (t, J = 7.1 Hz, 3H, CO<sub>2</sub>CH<sub>2</sub>CH<sub>3</sub>).

<sup>13</sup>C NMR (101 MHz, CDCl<sub>3</sub>) δ 177.2, 139.8, 128.6, 128.4, 127.3, 120.1, 102.4, 60.6, 53.2, 43.3, 25.0, 20.7, 14.5.

HRMS (ESI/QTOF) m/z: [M + H]<sup>+</sup> Calcd for C<sub>15</sub>H<sub>20</sub>NO<sub>2</sub><sup>+</sup> 246.1489; Found 246.1494.

IR (ν<sub>max</sub>, cm<sup>-1</sup>) 3332 (w), 3127 (w), 2975 (m), 2928 (m), 1710 (s), 1453 (m), 1253 (s), 1112 (s), 1029 (m), 803 (m), 740 (s).

**tert-Butyl benzyl((3-(hydroxymethyl)-3-phenylcycloprop-1-en-1-yl)methyl)carbamate (3n)**

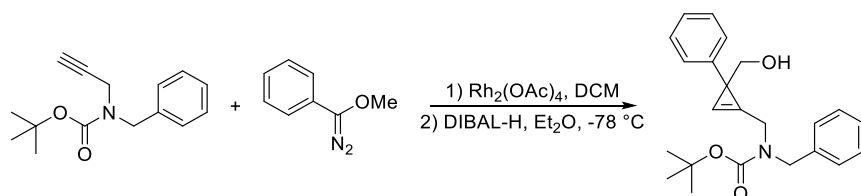

Following general procedure B, starting from diazo **S1a** (2.412 g, 13.69 mmol, 1.000 equiv.), the intermediate product was purified by flash column chromatography (SiO<sub>2</sub>, 80 g, 10 – 20% EtOAc in pentane, R<sub>f</sub> = 0.20 in 10% EtOAc in pentane). A portion of the Boc protected intermediate (1.023 g, 2.600 mmol, 1.000 equiv.) was then dissolved in anhydrous diethyl ether (25 mL) and cooled to -78 °C. A solution of DIBAL-H (1.0 M solution in toluene, 4.33 mL, 5.20 mmol, 2.00 equiv.) was then added to the reaction mixture dropwise. The mixture was stirred for 2 hours at -78 °C, then warmed to room temperature and stirred for an additional 1 hour. The mixture was then quenched with sat. aq. NH<sub>4</sub>Cl (5 mL), then acidified with 1 M HCl (40 mL), and extracted with diethyl ether (3 x 40 mL). The combined organic layers were washed with brine (40 mL), dried over anhydrous Na<sub>2</sub>SO<sub>4</sub>, filtered and concentrated *in vacuo*. The crude residue was then purified with flash column chromatography (SiO<sub>2</sub>, 25 g, 10 - 30% EtOAc in hexanes) to afford alcohol **3n** as a yellow oil (0.5048 g, 1.381 mmol, 53%, 38% over 2 steps).

TLC: R<sub>f</sub> = 0.52 (SiO<sub>2</sub>, 30% EtOAc in pentane).

<sup>1</sup>H NMR (400 MHz, CDCl<sub>3</sub>) δ 7.35 – 7.26 (m, 5H, ArH), 7.25 – 7.10 (m, 5H, ArH), 6.88 (s, 1H, C=CH), 4.51 (d, J = 15.3 Hz, 1H, HOCH<sub>2</sub>), 4.47 – 4.32 (m, 1H, ArCH<sub>2</sub>), 4.31 – 4.15 (m, 2H, HOCH<sub>2</sub>, ArCH<sub>2</sub>), 4.13 – 3.94 (m, 1H, C=C-CH<sub>2</sub>), 3.85 (s, 1H, C=C-CH<sub>2</sub>), 2.77 (br s, 1H, OH), 1.45 (s, 9H, C(CH<sub>3</sub>)<sub>3</sub>).

<sup>13</sup>C NMR (101 MHz, CDCl<sub>3</sub>) δ 156.3, 145.7, 137.6, 128.6, 128.1, 127.5, 126.2, 125.7, 121.6, 105.3, 81.1, 66.9, 51.5, 42.4, 32.5, 28.3.

HRMS (ESI/QTOF) m/z: [M + Na]<sup>+</sup> Calcd for C<sub>23</sub>H<sub>27</sub>NNaO<sub>3</sub><sup>+</sup> 388.1883; Found 388.1887.

IR (ν<sub>max</sub>, cm<sup>-1</sup>) 3450 (w), 3061 (w), 2981 (m), 2944 (w), 2880 (w), 2834 (w), 1693 (s), 1494 (m), 1453 (m), 1409 (m), 1366 (m), 1281 (m), 1245 (s), 1164 (s), 1125 (m), 1069 (m), 983 (s), 914 (s), 845 (m).

**N-Benzyl-1-(3-(((*tert*-butyldimethylsilyl)oxy)methyl)-3-phenylcycloprop-1-en-1-yl)methanamine (3o)**

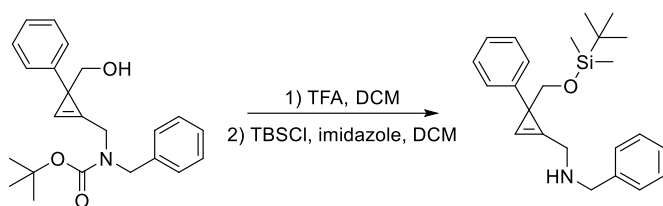

Alcohol **3n** (0.5482 g, 1.500 mmol, 1.000 equiv.) was dissolved in DCM (10 mL), cooled to 0 °C and TFA (0.919 mL, 12.0 mmol, 8.00 equiv.) was added. The reaction was then stirred at 0 °C for 30 minutes, allowed to warm to room temperature and then stirred for another 30 minutes. The reaction mixture was then concentrated *in vacuo*, and the crude residue was suspended in sat. aq. K<sub>2</sub>CO<sub>3</sub> (30 mL) and extracted with DCM (3 x 30 mL). The combined organic layers were then dried over anhydrous Na<sub>2</sub>SO<sub>4</sub>, filtered and concentrated *in vacuo*. The crude amino alcohol was then dissolved in anhydrous DCM (20 mL) and TBSCl (339.1 mg, 2.250 mmol, 1.500 equiv.) and imidazole (204.2 mg, 3.000 mmol, 2.000 equiv.) were added, and the reaction was stirred at room temperature for 4 h. The reaction was then quenched with sat. aq. NH<sub>4</sub>Cl (30 mL), diluted with DCM (20 mL) and separated. The aqueous fraction was then extracted again with DCM (2 x 30 mL), and the combined organic layers were dried over anhydrous Na<sub>2</sub>SO<sub>4</sub>, filtered and concentrated *in vacuo*. The crude product was then purified by flash column chromatography (SiO<sub>2</sub>, 12 g, 5 – 20% EtOAc in pentane) to afford **3o** as a pale-yellow oil (126 mg, 0.331 mmol, 22%).

TLC: R<sub>f</sub> = 0.37 (SiO<sub>2</sub>, 15% EtOAc in pentane).

<sup>1</sup>H NMR (400 MHz, CDCl<sub>3</sub>) δ 7.33 – 7.26 (m, 5H, ArH), 7.26 – 7.21 (m, 4H, ArH), 7.19 – 7.13 (m, 1H, ArH), 6.89 (t, *J* = 1.5 Hz, 1H, C=CH), 4.21 (dd, *J* = 10.4, 0.6 Hz, 1H, SiOCH<sub>2</sub>), 3.92 (d, *J* = 10.4 Hz, 1H, SiOCH<sub>2</sub>), 3.87 – 3.79 (m, 2H, C=C-CH<sub>2</sub>), 3.77 (d, *J* = 1.5 Hz, 2H, ArCH<sub>2</sub>), 0.87 (s, 9H, OSiC(CH<sub>3</sub>)<sub>3</sub>), 0.02 (d, *J* = 3.9 Hz, 6H, OSi(CH<sub>3</sub>)<sub>2</sub>).

<sup>13</sup>C NMR (101 MHz, CDCl<sub>3</sub>) δ 146.6, 140.0, 128.5, 128.4, 128.1, 127.2, 126.6, 125.4, 124.2, 104.0, 69.2, 53.4, 44.1, 32.1, 26.1, 18.4, -5.1 (2 x CH<sub>3</sub>Si).

HRMS (QTOF) *m/z*: [M + H]<sup>+</sup> Calcd for C<sub>24</sub>H<sub>34</sub>NOSi<sup>+</sup> 380.2404; Found 380.2405.

IR (ν<sub>max</sub>, cm<sup>-1</sup>) 3326 (w), 3085 (w), 3060 (w), 3027 (w), 2953 (m), 2929 (m), 2889 (m), 2856 (m), 1767 (w), 1712 (w), 1602 (w), 1495 (w), 1467 (m), 1254 (m), 1108 (m).

## Optimization Studies

General Procedure for Ligand Optimization: An oven-dried 8 mL microwave tube equipped with a stirring bar was placed in a nitrogen-filled glovebox and charged with Pd<sub>2</sub>dba<sub>3</sub>·CHCl<sub>3</sub> (2.9 mg, 2.8 μmol, 4.0 mol%), ligand (8.4 μmol, 12 mol%) and Cs<sub>2</sub>CO<sub>3</sub> (30 mg, 91 μmol, 1.3 equiv.). The vial was sealed and taken out of the glove box, then toluene (0.35 mL) was added, and the vial was placed in a preheated aluminum block and stirred at 80 °C for 15 minutes. Then, cyclopropene **3a** (20.5 mg, 70.0 μmol, 1.00 equiv.), trifluoroacetaldehyde ethyl hemiacetal (14 μL, 0.11 mmol, 1.5 equiv.), aryl iodide (0.105 mmol, 1.50 equiv.), and remaining toluene (0.35 mL) was added, and the solution was stirred at 100 °C for 16 h. The reaction was then cooled to room temperature, filtered through a plug of silica gel eluting with EtOAc (~8 mL), and concentrated *in vacuo*. The crude reaction mixture was then dissolved in CDCl<sub>3</sub> and yield was determined by <sup>1</sup>H NMR, using trichloroethylene as an internal standard.

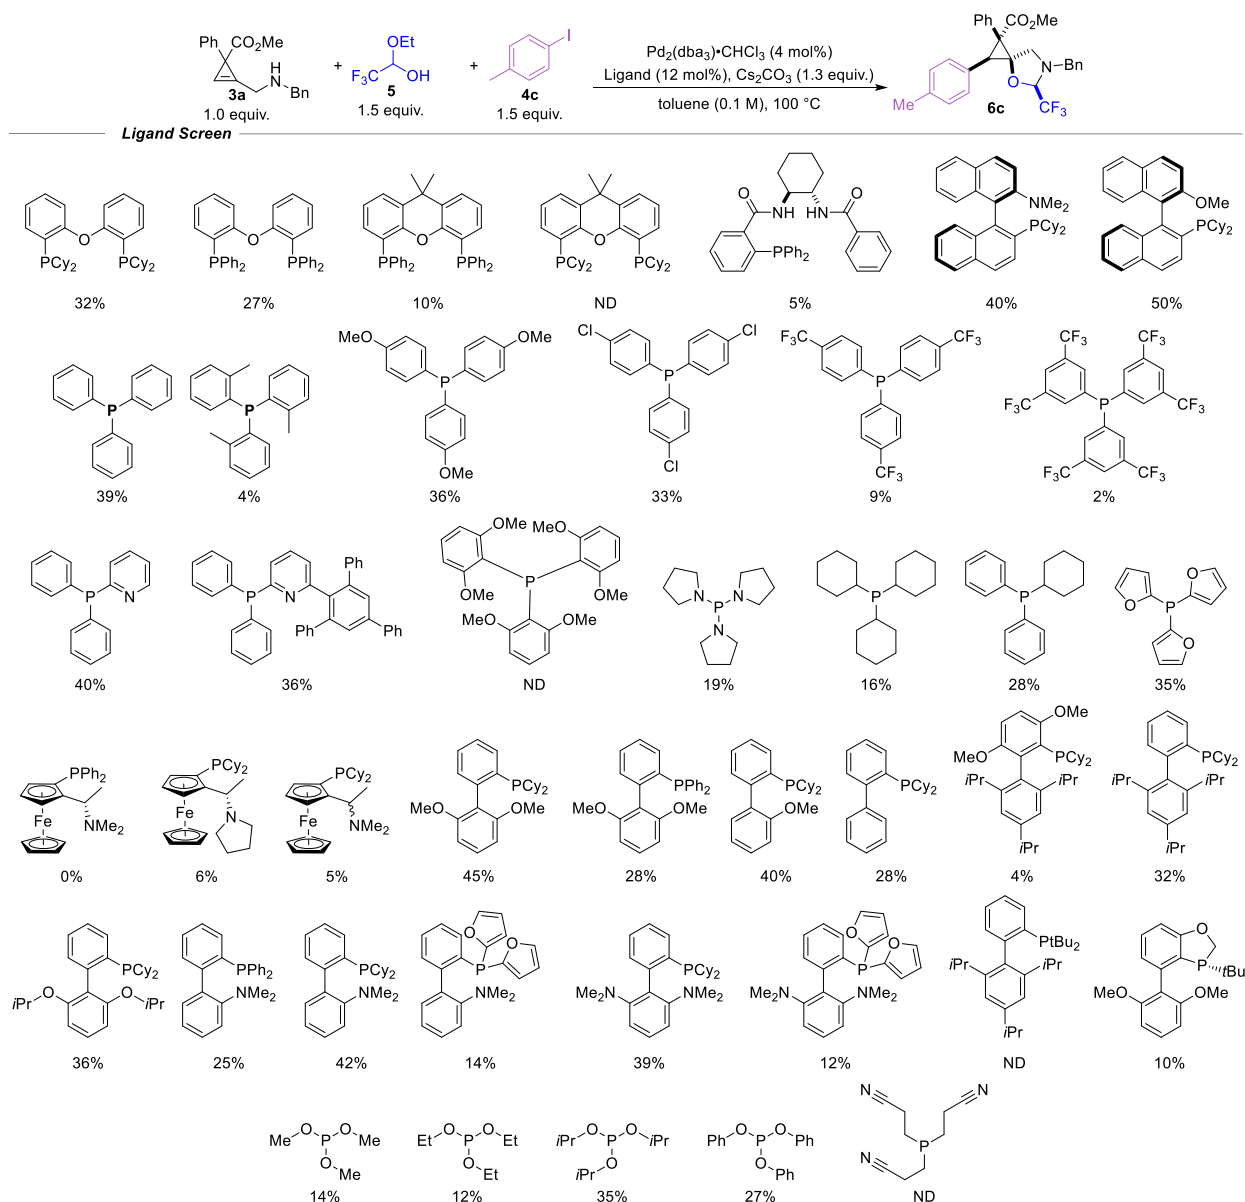

**Scheme S1.** Ligand screen for the tethered carboetherification of cyclopropenes. Reactions performed according to optimization procedure presented *vide supra*. N.D. = not detected.

### Data-driven ligand optimization

The code to reproduce these results is available at [GitHub - aa-schoepfer/carboether\\_of\\_cyclopropenes](https://github.com/aa-schoepfer/carboether_of_cyclopropenes)

Ligand screening for product **6c** was supported by data-driven multivariate linear regression (MLR) models. Featurized monophosphine ligands were taken from the Kraken data set.<sup>16</sup> For modeling, we used Bayesian ridge regression in combination with forward sequential feature selection, applying leave-one-out cross-validation with negative mean squared error as the scoring metric and a tolerance of 0.001, implemented in scikit-learn.<sup>17,18</sup> Entries with no yield were excluded, and percent yields were converted into fractions for improved regularization (e.g., 10% to 0.1). For visualization, principal component analysis (PCA) was performed either on the full set of available features or on the subset selected by the MLR models.

In the small-data regime, MLR models tend to overfit, yielding inaccurate predictions on out-of-sample entries. As a rule of thumb, this can be identified when the mean error approaches 0% on training data. To reduce bias, we employed automated feature selection for model construction. However, this approach was only feasible after at least 24 entries, at which point the model achieved a mean absolute error (MAE) of 7% yield on the training set (Figure S1a).



A final round of readily available ligands was tested despite not being predicted to provide major improvements (Figure S1). As expected, no significant improvement was observed, as no ligand exceeded the current best performance of 45%. The model was then retrained with the newly obtained data and yielded an MAE of 6% yield on the training data (Figure S2a).

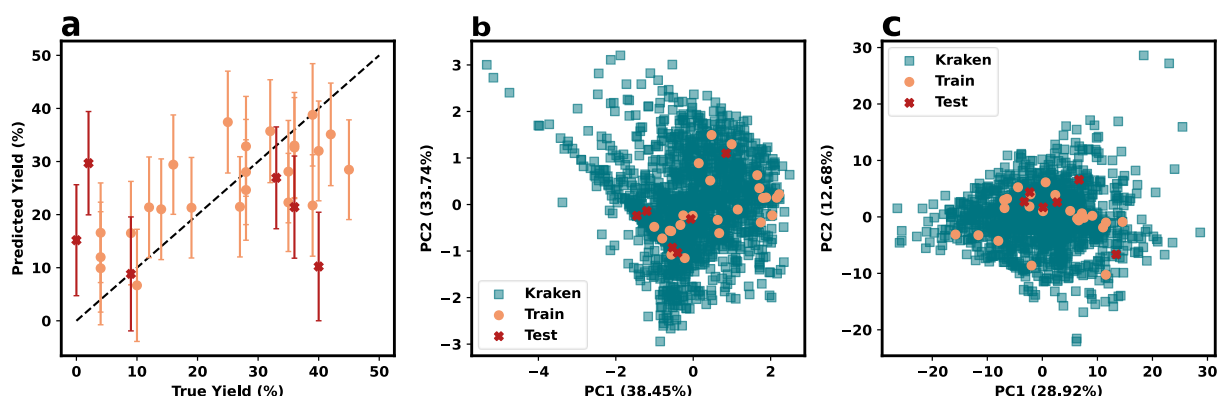

**Figure S1.** a) Correlation plot of the used model. Orange dots represent train points, red crosses test points. Train MAE of 7% and Test MAE of 16%. Error bars represent  $1\sigma$  given by the Bayesian ridge regression method. b) PCA of the model-selected feature subset. The explained variance ratio is found in the axis titles. c) PCA of the fully Kraken feature set.

We next screened the Kraken dataset for promising and easily accessible ligands (Figure S2). Among the top ten predicted candidates, only one ligand was predicted to exceed 50% yield, while the 10th-ranked candidate was already below the current best yield of 45%. PCA of the model-selected features revealed that most of the top candidates are far removed from previously tested ligands in feature space, suggesting they are likely false “better-than-best” predictions (Figure S2b), or at least, very exploratory. Moreover, decomposition of the MLR predictions into the individual contribution of each feature (Scheme S2 and Scheme S3), shows that the top 2 candidates predict higher yields due to a steric feature (vbur\_qvbur\_min\_max) for which there is no comparable precedent in the current training data. Reversely, PCA on the full feature set reveals that most of the predicted candidates are within or close to the space of already tested ligands. Taken together, these results suggest that monophosphine ligand screening within the Kraken dataset is approaching a performance plateau. This finding motivated us to shift focus away from ligand optimization toward other parameters, which ultimately proved to be key for achieving successful general optimization.

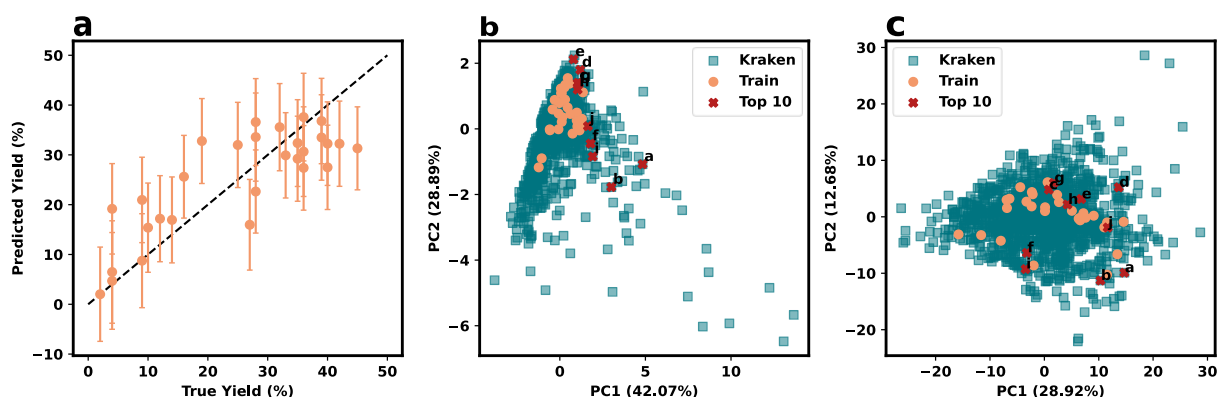

**Figure S2.** a) Correlation plot of the used model. Full MAE of 6%. b) PCA of the model-selected feature subset with the top 10 candidates. The explained variance ratio is found in the axis titles. c) PCA of the fully Kraken feature set with the top 10 candidates.

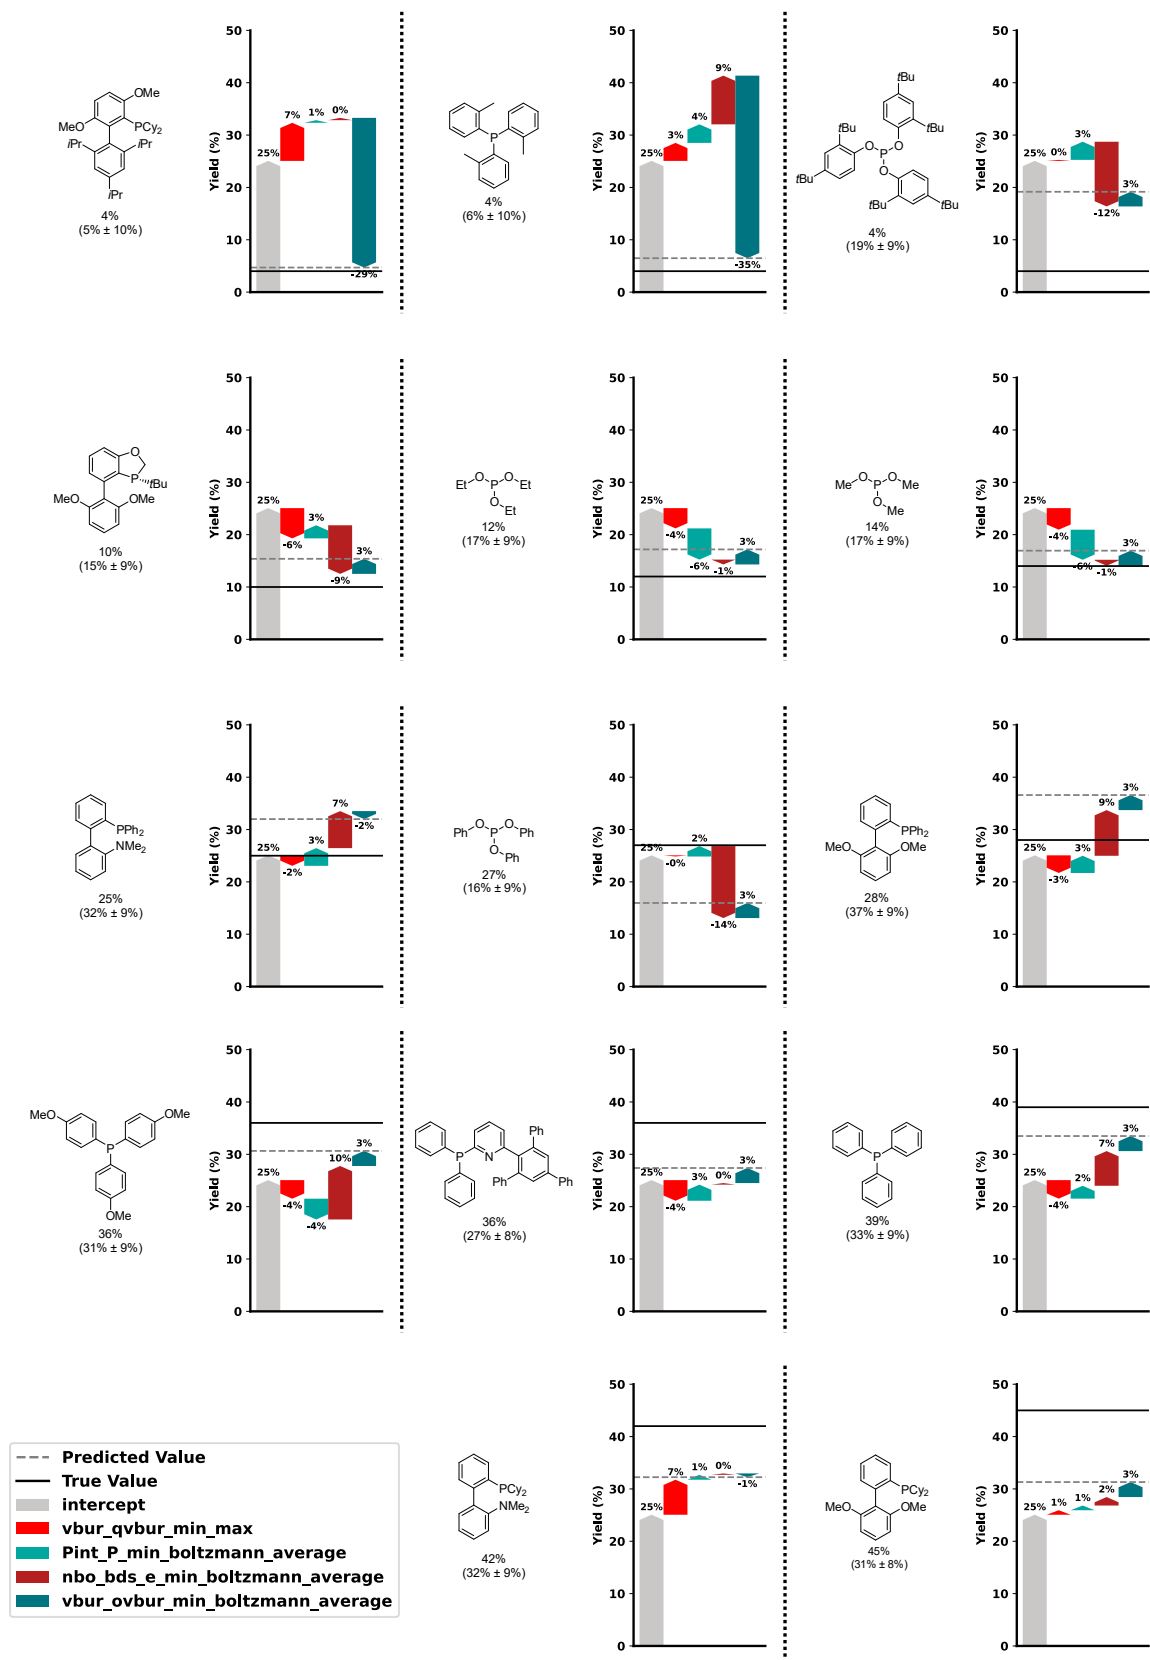

**Scheme S2.** Examples of ligand structures and attributions of features of training set.

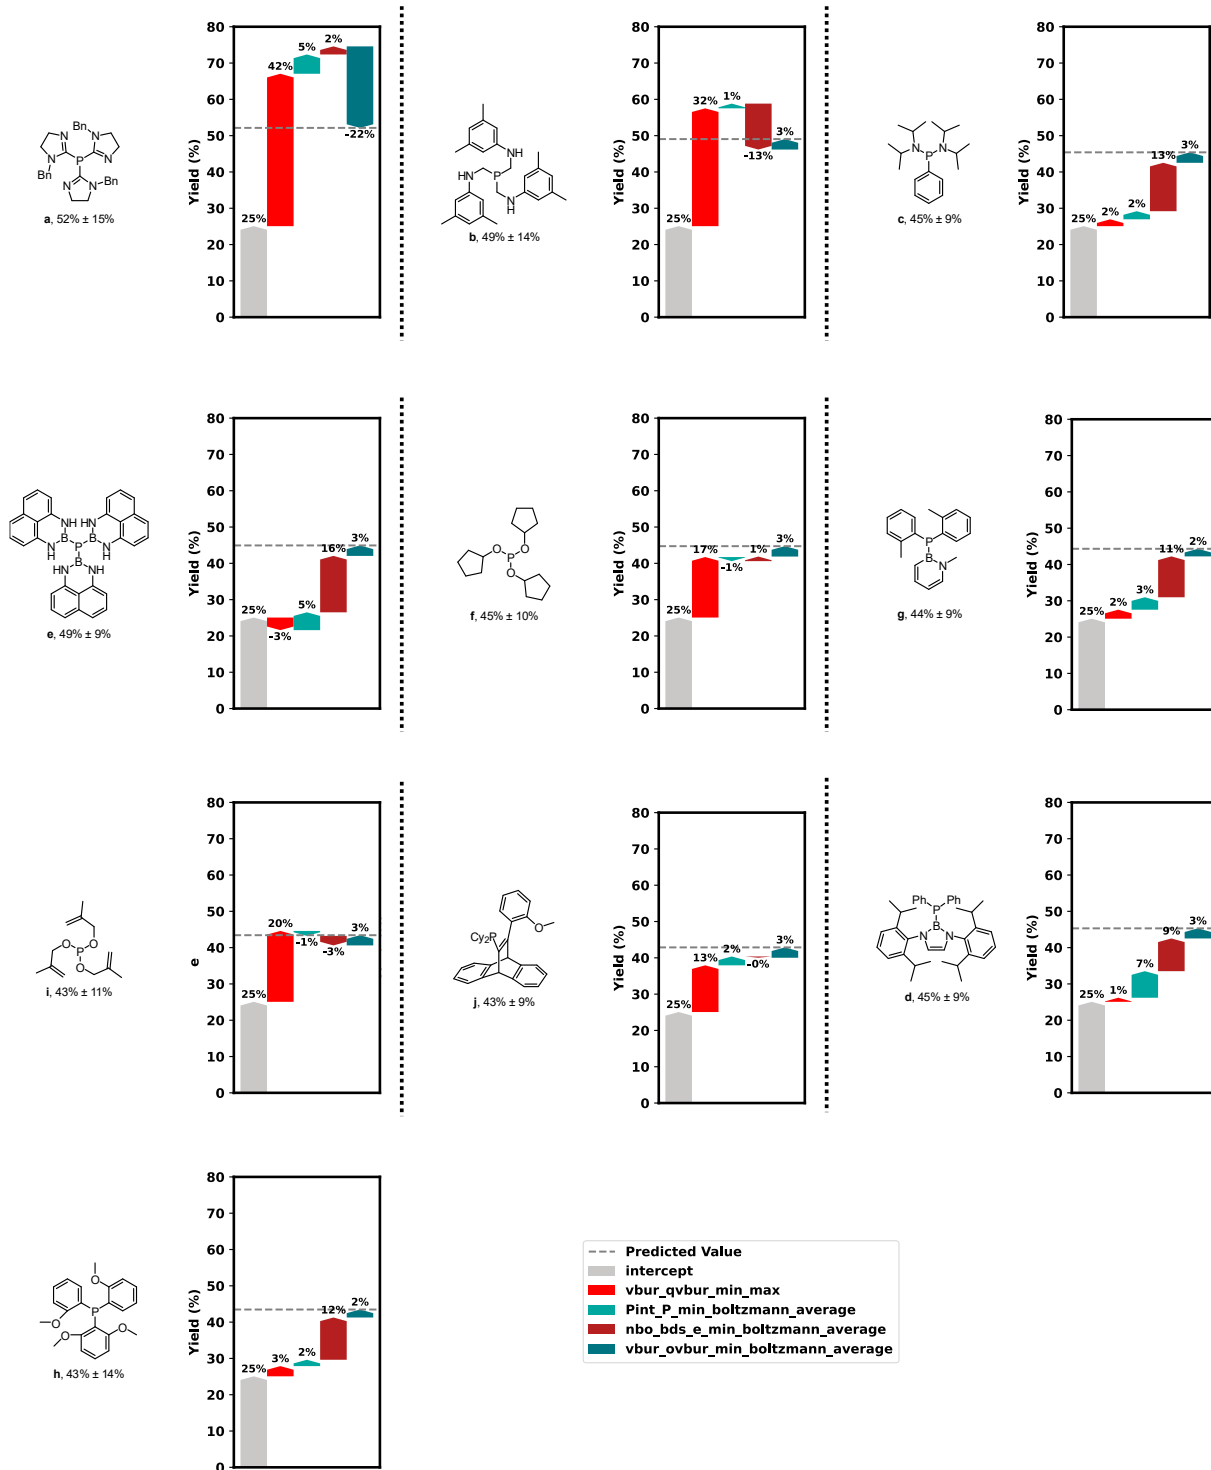

**Scheme S3.** Structures of top 10 predicted ligand structures within the Kraken data set.

**Table S1.** Optimization of catalyst system using 4-iodobenzotrifluoride.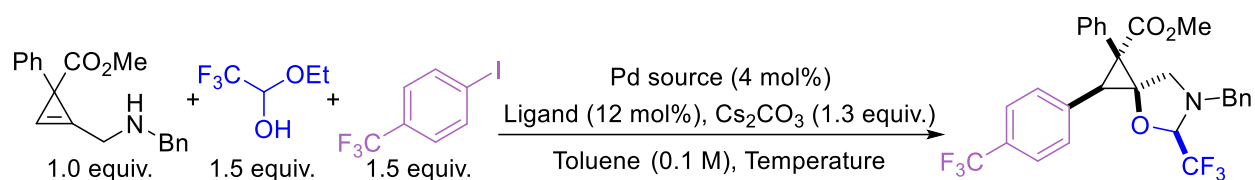

| Entry | [Pd] and Ligand                                                         | Temperature | Yield <sup>[a]</sup> |
|-------|-------------------------------------------------------------------------|-------------|----------------------|
| 1     | N/A                                                                     | 80 °C       | N.D.                 |
| 2     | $\text{Pd}_2\text{dba}_3 \cdot \text{CHCl}_3$ /SPhos                    | 80 °C       | 53%                  |
| 3     | $\text{Pd}_2\text{dba}_3 \cdot \text{CHCl}_3$ /XantPhos                 | 80 °C       | 19%                  |
| 4     | $\text{Pd}_2\text{dba}_3 \cdot \text{CHCl}_3$ /PPh <sub>3</sub>         | 80 °C       | 41%                  |
| 5     | $\text{Pd}_2\text{dba}_3 \cdot \text{CHCl}_3$ /(2-Furyl) <sub>3</sub> P | 80 °C       | 32%                  |
| 6     | $\text{Pd}_2\text{dba}_3 \cdot \text{CHCl}_3$ /BrettPhos                | 80 °C       | 13%                  |
| 7     | SPhos Pd G3/SPhos                                                       | 80 °C       | 69%                  |
| 8     | SPhos Pd G4/SPhos                                                       | 80 °C       | 68%                  |
| 9     | SPhos Pd G3/SPhos                                                       | 100 °C      | 69%                  |
| 10    | SPhos Pd G3/SPhos                                                       | 60 °C       | 68%                  |

Reactions performed on 0.07 mmol scale for 16 h. [a] Yield determined by  $^1\text{H}$  NMR using trichloroethylene as an internal standard. N.D. = not detected

**Table S2.** Optimization of reaction conditions.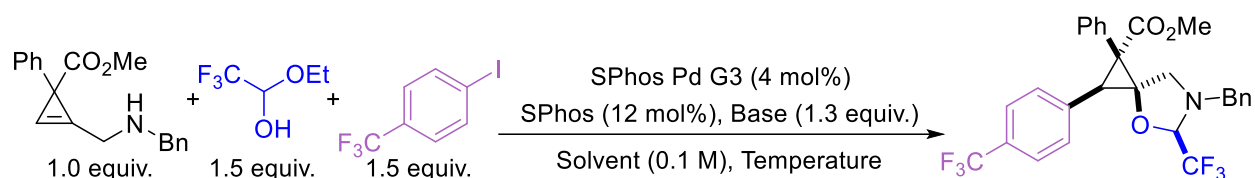

| Entry | Base                     | Solvent (0.1 M)        | Temperature | Yield <sup>[a]</sup> |
|-------|--------------------------|------------------------|-------------|----------------------|
| 1     | $\text{Cs}_2\text{CO}_3$ | DCE                    | 80 °C       | 69%                  |
| 2     | $\text{Cs}_2\text{CO}_3$ | $\text{CF}_3\text{Ph}$ | 80 °C       | 63%                  |
| 3     | $\text{Cs}_2\text{CO}_3$ | EtOAc                  | 80 °C       | 56%                  |
| 4     | $\text{Cs}_2\text{CO}_3$ | CPME                   | 80 °C       | 51%                  |
| 5     | $\text{Cs}_2\text{CO}_3$ | MeCN                   | 80 °C       | 36%                  |
| 6     | $\text{Cs}_2\text{CO}_3$ | PhCl                   | 80 °C       | 62%                  |
| 7     | $\text{K}_3\text{PO}_4$  | DCE                    | 80 °C       | 70%                  |
| 8     | $\text{K}_2\text{CO}_3$  | DCE                    | 80 °C       | 66%                  |
| 9     | $\text{KO}^t\text{Bu}$   | DCE                    | 80 °C       | ND                   |
| 10    | $\text{K}_3\text{PO}_4$  | DCE                    | 50 °C       | 80%                  |
| 11    | $\text{K}_3\text{PO}_4$  | DCE                    | 23 °C       | 67%                  |

Reactions performed on 0.07 mmol scale for 16 h. [a] Yield determined by  $^1\text{H}$  NMR using trichloroethylene as an internal standard.

# Procedures and Product Characterization of Cyclopropane Products

**General procedure C:** Synthesis of spirocyclopropanes.

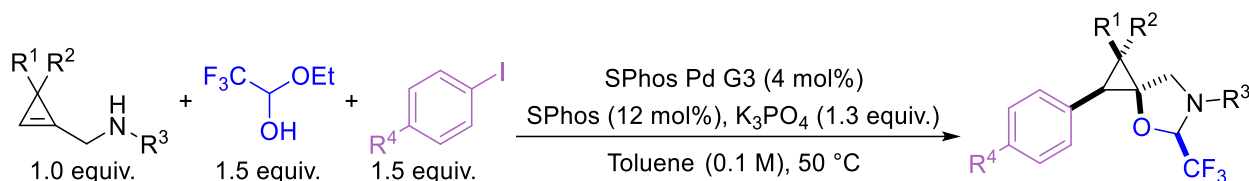

SPhos Pd G3 (7.7 mg, 0.080 mmol, 4 mol%), SPhos (13 mg, 0.024 mmol, 12 mol%) and K<sub>3</sub>PO<sub>4</sub> (55 mg, 0.26 mmol, 1.3 equiv.) are weighed in an 8 mL microwave vial inside of a nitrogen filled glovebox, sealed and removed from the glovebox. The vial is then charged with aryl iodide (1.5 equiv.) and the cyclopropene starting material (0.20 mmol, 1.0 equiv.), sealed, and purged and backfilled with nitrogen three times. Anhydrous DCE (2 mL, 0.1 M), trifluoroacetaldehyde ethyl hemiacetal (90%, 39  $\mu$ L, 0.30 mmol, 1.5 equiv.) and if liquid, the aryl iodide coupling partner (1.5 equiv.) are added and the reaction vial is placed into an aluminum reaction block that has been preheated to 50 °C and stirred for 16 h. The reaction mixture is then cooled to room temperature, and the crude mixture is filtered over a pad of silica gel, eluting with EtOAc, and concentrated *in vacuo*. The crude residue is then purified via flash column chromatography using the indicated solvents to afford the desired compounds.

**Methyl 6-benzyl-1-phenyl-5-(trifluoromethyl)-2-(4-(trifluoromethyl)phenyl)-4-oxa-6-azaspiro[2.4]heptane-1-carboxylate (6a)**

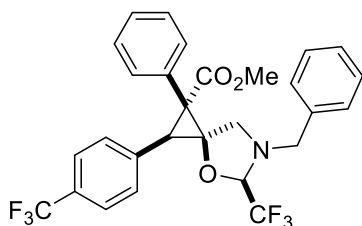

Following general procedure C, starting from **3a** (58 mg, 0.20 mmol, 1.0 equiv.), the crude product was purified by flash column chromatography (SiO<sub>2</sub>, 12 g, 3 – 15% Et<sub>2</sub>O in pentane) to afford **6a** as an off-white solid (77 mg, 0.14 mmol, 73%).

Melting Point: 124 – 125 °C.

TLC: R<sub>f</sub> = 0.22 (SiO<sub>2</sub>, 10% Et<sub>2</sub>O in pentane).

<sup>1</sup>H NMR (400 MHz, CDCl<sub>3</sub>)  $\delta$  7.38 (d, *J* = 8.2 Hz, 2H, ArH), 7.26 (s, 8H, ArH), 7.06 – 6.97 (m, 4H, ArH), 4.80 (q, *J* = 5.6 Hz, 1H, CHCF<sub>3</sub>), 3.90 (d, *J* = 13.2 Hz, 1H, CH<sub>2</sub>), 3.85 – 3.77 (m, 2H, CH<sub>2</sub>), 3.62 (s, 3H, CO<sub>2</sub>CH<sub>3</sub>), 3.49 – 3.42 (m, 1H, CH<sub>2</sub>), 3.25 (s, 1H, CH).

<sup>13</sup>C NMR (101 MHz, CDCl<sub>3</sub>)  $\delta$  172.4, 138.2, 137.0, 132.8, 130.5, 130.2, 128.8, 128.8, 128.7 (q, *J*<sub>C-F</sub> = 32.4 Hz), 128.1, 127.9, 127.9, 124.4 (q, *J* = 3.8 Hz), 124.40 (q, *J*<sub>C-F</sub> = 271.7 Hz), 123.1 (q, *J*<sub>C-F</sub> = 283.5 Hz), 93.6 (q, *J*<sub>C-F</sub> = 34.3 Hz), 73.5, 60.6, 57.5, 57.5, 53.3, 39.5.

<sup>19</sup>F NMR (376 MHz, CDCl<sub>3</sub>)  $\delta$  -62.44, -79.40 (d, *J* = 5.6 Hz).

HRMS (nanochip-ESI/LTQ-Orbitrap) *m/z*: [M + H]<sup>+</sup> Calcd for C<sub>28</sub>H<sub>24</sub>F<sub>6</sub>NO<sub>3</sub><sup>+</sup> 536.1655; Found 536.1654.

IR ( $\nu_{\text{max}}$ , cm<sup>-1</sup>) 3065 (w), 3034 (w), 2953 (w), 2849 (w), 1718 (m), 1619 (w), 1326 (s), 1256 (m), 1235 (m), 1169 (s), 1119 (s), 1070 (m), 1016 (m), 990 (m), 847 (m).

**(+)-Methyl 6-benzyl-1-phenyl-5-(trifluoromethyl)-2-(4-(trifluoromethyl)phenyl)-4-oxa-6-azaspiro[2.4]heptane-1-carboxylate ((+)-6a)**

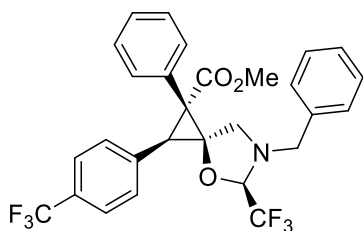

Following general procedure C, starting from **(+)-3a** (29 mg, 0.10 mmol, 1.0 equiv.), the crude product was purified by flash column chromatography (SiO<sub>2</sub>, 12 g, 3 – 15% Et<sub>2</sub>O in pentane) to afford **(+)-6a** as an off-white solid (33 mg, 0.062 mmol, 62%) with identical spectral properties to racemic **6a**. The enantiomeric ratio was determined to be 87:13 by HPLC analysis on a Daicel Chiralpak IB N-5 column: 99:1 hexane/IPA, flow rate 1 mL/min,  $\lambda$  = 254 nm:  $\tau_{\text{major}}$  = 8.0 min,  $\tau_{\text{minor}}$  = 8.9 min.

$[\alpha]_{\text{D}}^{20}$  = 166.8 ( $c$  = 1.17 in CHCl<sub>3</sub>, 87:13 e.r.,)

**Methyl 6-benzyl-1,2-diphenyl-5-(trifluoromethyl)-4-oxa-6-azaspiro[2.4]heptane-1-carboxylate (6b)**

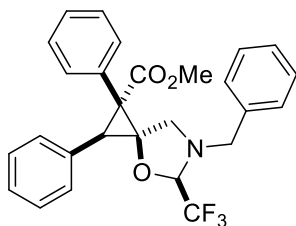

Following general procedure C, starting from **3a** (59 mg, 0.20 mmol, 1.0 equiv.), the crude product was purified by flash column chromatography (SiO<sub>2</sub>, 12 g, 3 – 10% Et<sub>2</sub>O in pentane, then SiO<sub>2</sub>, 12 g 20 – 45% DCM in pentane) to afford **6b** as an off-white solid (51 mg, 0.11 mmol, 54%).

Melting Point: 137 – 139 °C.

TLC:  $R_f$  = 0.19 (SiO<sub>2</sub>, 10% Et<sub>2</sub>O in pentane).

<sup>1</sup>H NMR (400 MHz, CDCl<sub>3</sub>)  $\delta$  7.33 – 7.26 (m, 5H, ArH), 7.25 – 7.11 (m, 6H, ArH), 7.06 – 7.00 (m, 2H, ArH), 7.00 – 6.94 (m, 2H, ArH), 4.79 (q,  $J$  = 5.7 Hz, 1H, CHCF<sub>3</sub>), 3.92 (d,  $J$  = 13.2 Hz, 1H, CH<sub>2</sub>), 3.86 – 3.75 (m, 2H, CH<sub>2</sub>), 3.61 (s, 3H, CO<sub>2</sub>CH<sub>3</sub>), 3.48 – 3.40 (m, 1H, CH<sub>2</sub>), 3.23 (s, 1H, CH).

<sup>13</sup>C NMR (101 MHz, CDCl<sub>3</sub>)  $\delta$  172.8, 137.3, 134.0, 132.9, 130.8, 130.3, 128.8, 128.7, 127.9, 127.7, 127.6, 127.5, 126.7, 123.0 (q,  $J_{\text{C-F}}$  = 283.4 Hz), 93.5 (q,  $J_{\text{C-F}}$  = 34.2 Hz), 73.5, 60.6, 57.6, 53.1, 40.2, 38.9.

<sup>19</sup>F NMR (376 MHz, CDCl<sub>3</sub>)  $\delta$  -79.42 (d,  $J$  = 5.6 Hz).

HRMS (ESI/QTOF)  $m/z$ :  $[M + H]^+$  Calcd for C<sub>27</sub>H<sub>25</sub>F<sub>3</sub>NO<sub>3</sub><sup>+</sup> 468.1781; Found 468.1783.

IR ( $\nu_{\text{max}}$ , cm<sup>-1</sup>) 3089 (w), 3063 (w), 3032 (w), 2952 (w), 2846 (w), 1955 (w), 1881 (w), 1809 (w), 1715 (s), 1498 (m), 1293 (s), 1255 (s), 1233 (s), 1174 (s), 1147 (s), 1123 (s), 992 (s), 760 (s).

**Methyl 6-benzyl-1-phenyl-2-(p-tolyl)-5-(trifluoromethyl)-4-oxa-6-azaspiro[2.4]heptane-1-carboxylate (6c)**

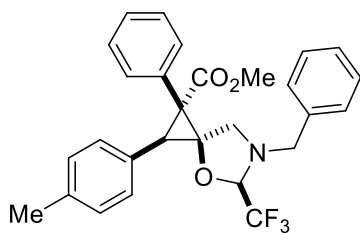

Following general procedure C, starting from **3a** (60 mg, 0.20 mmol, 1.0 equiv.), the crude product was purified by flash column chromatography (SiO<sub>2</sub>, 12 g, 3 – 15% Et<sub>2</sub>O in pentane) to afford **6c** as an off-white solid (44 mg, 0.091 mmol, 45%).

Melting Point: 137 – 138 °C.

TLC: R<sub>f</sub> = 0.49 (SiO<sub>2</sub>, 10% Et<sub>2</sub>O in pentane).

<sup>1</sup>H NMR (400 MHz, CDCl<sub>3</sub>) δ 7.26 – 7.19 (m, 5H, ArH), 7.18 – 7.10 (m, 3H, ArH), 6.98 – 6.92 (m, 2H, ArH), 6.88 (d, *J* = 8.1 Hz, 2H, ArH), 6.77 (d, *J* = 8.2 Hz, 2H, ArH), 4.69 (q, *J* = 5.7 Hz, 1H, CHCF<sub>3</sub>), 3.83 (d, *J* = 13.2 Hz, 1H, CH<sub>2</sub>), 3.75 (d, *J* = 13.2 Hz, 1H, CH<sub>2</sub>), 3.69 (d, *J* = 13.2 Hz, 1H, CH<sub>2</sub>), 3.53 (s, 3H, CO<sub>2</sub>CH<sub>3</sub>), 3.38 – 3.32 (m, 1H, CH<sub>2</sub>), 3.12 (s, 1H, CH), 2.22 (s, 3H, ArCH<sub>3</sub>).

<sup>13</sup>C NMR (101 MHz, CDCl<sub>3</sub>) δ 172.7, 137.2, 136.1, 132.8, 130.8, 130.6, 130.0, 128.7, 128.6, 128.3, 127.8, 127.5, 127.5, 127.4, 121.7 (q, *J*<sub>C-F</sub> = 283.4 Hz), 93.4 (q, *J*<sub>C-F</sub> = 34.3 Hz), 73.3, 60.5, 57.5, 52.9, 39.9, 38.6, 21.1.

<sup>19</sup>F NMR (376 MHz, CDCl<sub>3</sub>) δ -79.43 (d, *J* = 5.7 Hz, 1F).

HRMS (nanochip-ESI/LTQ-Orbitrap) *m/z*: [M + H]<sup>+</sup> Calcd for C<sub>28</sub>H<sub>27</sub>F<sub>3</sub>NO<sub>3</sub><sup>+</sup> 482.1938; Found 482.1935.

IR (ν<sub>max</sub>, cm<sup>-1</sup>) 3060 (w), 3029 (w), 2954 (w), 2902 (w), 1715 (m), 1517 (w), 1497 (w), 1452 (w), 1436 (w), 1293 (m), 1255 (m), 1232 (s), 1177 (m), 1147 (m), 1123 (m), 996 (m), 771 (s).

**Methyl 6-benzyl-2-(4-methoxyphenyl)-1-phenyl-5-(trifluoromethyl)-4-oxa-6-azaspiro[2.4]heptane-1-carboxylate (6d)**

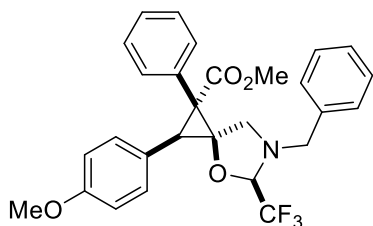

Following general procedure C, starting from **3a** (58 mg, 0.20 mmol, 1.0 equiv.), the crude product was purified by flash column chromatography (SiO<sub>2</sub>, 12 g, 5 – 18% Et<sub>2</sub>O in pentane) to afford **6d** as an off-white solid (31 mg, 0.061 mmol, 31%).

Melting Point: 107 – 108 °C.

TLC: R<sub>f</sub> = 0.21 (SiO<sub>2</sub>, 10% Et<sub>2</sub>O in pentane).

<sup>1</sup>H NMR (400 MHz, CDCl<sub>3</sub>) δ 7.35 – 7.26 (m, 5H, ArH), 7.26 – 7.18 (m, 3H, ArH), 7.05 – 6.98 (m, 2H, ArH), 6.92 – 6.85 (m, 2H, ArH), 6.72 – 6.65 (m, 2H, ArH), 4.77 (q, *J* = 5.6 Hz, 1H, CHCF<sub>3</sub>), 3.95 – 3.80 (m, 2H, CH<sub>2</sub>), 3.76 (s, 4H, CH<sub>2</sub>, ArOCH<sub>3</sub>), 3.60 (s, 3H, CO<sub>2</sub>CH<sub>3</sub>), 3.49 – 3.38 (m, 1H, CH<sub>2</sub>), 3.18 (s, 1H, CH).

$^{13}\text{C}$  NMR (101 MHz,  $\text{CDCl}_3$ )  $\delta$  172.9, 158.4, 137.3, 133.0, 131.3, 130.9, 128.9, 128.7, 127.9, 127.6, 127.5, 125.9, 123.2 (q,  $J_{\text{C-F}} = 283.5$  Hz), 113.2, 93.4 (q,  $J_{\text{C-F}} = 34.2$  Hz), 73.4, 60.6, 57.7, 55.3, 53.0, 39.8, 38.5.

$^{19}\text{F}$  NMR (376 MHz,  $\text{CDCl}_3$ )  $\delta$  -79.4 (d,  $J = 5.5$  Hz).

HRMS (APCI/QTOF)  $m/z$ :  $[\text{M} + \text{Na}]^+$  Calcd for  $\text{C}_{28}\text{H}_{26}\text{F}_3\text{NNaO}_4^+$  520.1706; Found 520.1705.

IR ( $\nu_{\text{max}}$ ,  $\text{cm}^{-1}$ ) 3061 (w), 3028 (w), 2955 (w), 2903 (w), 2840 (w), 1714 (m), 1515 (m), 1296 (m), 1254 (s), 1235 (s), 1177 (s), 1147 (s), 1123 (m), 1034 (m), 994 (m), 770 (s).

**Methyl 6-benzyl-2-(4-(*tert*-butyl)phenyl)-1-phenyl-5-(trifluoromethyl)-4-oxa-6-azaspiro[2.4]heptane-1-carboxylate (6e)**

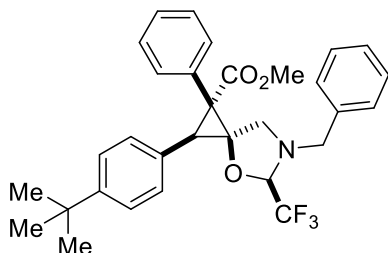

Following general procedure C, starting from **3a** (57 mg, 0.19 mmol, 1.0 equiv.), the crude product was purified by flash column chromatography ( $\text{SiO}_2$ , 12 g, 3 – 15%  $\text{Et}_2\text{O}$  in pentane) to afford **6e** as a white solid (20 mg, 0.038 mmol, 20%).

Melting Point: 135 – 137  $^\circ\text{C}$ .

TLC:  $R_f = 0.32$  ( $\text{SiO}_2$ , 10%  $\text{Et}_2\text{O}$  in pentane).

$^1\text{H}$  NMR (400 MHz,  $\text{CDCl}_3$ )  $\delta$  7.33 – 7.27 (m, 5H,  $\text{ArH}$ ), 7.25 – 7.17 (m, 3H,  $\text{ArH}$ ), 7.18 – 7.13 (m, 2H,  $\text{ArH}$ ), 7.06 – 7.00 (m, 2H,  $\text{ArH}$ ), 6.93 – 6.86 (m, 2H,  $\text{ArH}$ ), 4.78 (q,  $J = 5.6$  Hz, 1H,  $\text{CHF}_3$ ), 3.93 (d,  $J = 13.2$  Hz, 1H,  $\text{CH}_2$ ), 3.84 (d,  $J = 13.2$  Hz, 1H,  $\text{CH}_2$ ), 3.81 – 3.73 (m, 1H,  $\text{CH}_2$ ), 3.61 (s, 3H,  $\text{CO}_2\text{CH}_3$ ), 3.47 – 3.41 (m, 1H,  $\text{CH}_2$ ), 3.21 (s, 1H,  $\text{CH}$ ), 1.29 (s, 9H,  $\text{C}(\text{CH}_3)_3$ ).

$^{13}\text{C}$  NMR (101 MHz,  $\text{CDCl}_3$ )  $\delta$  172.9, 149.4, 137.4, 133.0, 130.9, 130.7, 129.9, 128.9, 128.7, 127.9, 127.6, 127.4, 124.5, 123.2 (q,  $J = 283.5$  Hz), 93.4 (q,  $J = 34.1$  Hz), 73.4, 60.5, 57.6, 53.0, 39.9, 38.7, 34.5, 31.4.

$^{19}\text{F}$  NMR (376 MHz,  $\text{CDCl}_3$ )  $\delta$  -79.4 (d,  $J = 5.6$  Hz).

HRMS (ESI/QTOF)  $m/z$ :  $[\text{M} + \text{H}]^+$  Calcd for  $\text{C}_{31}\text{H}_{33}\text{F}_3\text{NO}_3^+$  524.2407; Found 524.2421.

IR ( $\nu_{\text{max}}$ ,  $\text{cm}^{-1}$ ) 2970 (s), 2901 (s), 1713 (m), 1406 (m), 1254 (m), 1217 (s), 1061 (s), 912 (m).

**Methyl 6-benzyl-2-(4-fluorophenyl)-1-phenyl-5-(trifluoromethyl)-4-oxa-6-azaspiro[2.4]heptane-1-carboxylate (6f)**

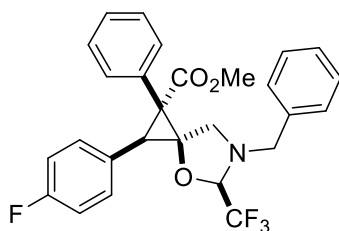



Following general procedure C, starting from **3a** (59 mg, 0.20 mmol, 1.0 equiv.), the crude product was purified by flash column chromatography (SiO<sub>2</sub>, 12 g, 5 – 15% Et<sub>2</sub>O in pentane) to afford **6f** as an off-white solid (69 mg, 0.14 mmol, 71%).

Melting Point: 126 – 127 °C.

TLC: R<sub>f</sub> = 0.28 (SiO<sub>2</sub>, 10% Et<sub>2</sub>O in pentane).

<sup>1</sup>H NMR (400 MHz, CDCl<sub>3</sub>) δ 7.37 – 7.26 (m, 5H, ArH), 7.26 – 7.17 (m, 3H, ArH), 7.04 – 6.98 (m, 2H, ArH), 6.96 – 6.89 (m, 2H, ArH), 6.87 – 6.79 (m, 2H, ArH), 4.79 (q, *J* = 5.7 Hz, 1H, CHCF<sub>3</sub>), 3.92 (d, *J* = 13.2 Hz, 1H, CH<sub>2</sub>), 3.85 – 3.76 (m, 2H, CH<sub>2</sub>), 3.61 (s, 3H, CO<sub>2</sub>CH<sub>3</sub>), 3.49 – 3.42 (m, 1H, CH<sub>2</sub>), 3.21 (s, 1H, CH).

<sup>13</sup>C NMR (101 MHz, CDCl<sub>3</sub>) δ 172.7, 161.8 (d, *J*<sub>C-F</sub> = 245.6 Hz), 137.1, 132.9, 131.7 (d, *J*<sub>C-F</sub> = 7.7 Hz), 130.5, 129.7 (d, *J*<sub>C-F</sub> = 3.3 Hz), 128.8, 128.7, 128.0, 127.7, 127.7, 123.2 (q, *J*<sub>C-F</sub> = 283.2 Hz), 114.6 (d, *J*<sub>C-F</sub> = 21.1 Hz), 93.5 (q, *J*<sub>C-F</sub> = 34.2 Hz), 73.3, 60.6, 57.6, 53.1, 39.3, 38.8.

<sup>19</sup>F NMR (376 MHz, CDCl<sub>3</sub>) δ -79.4 (d, *J* = 5.6 Hz), -115.9 (tt, *J* = 8.9, 5.6 Hz).

HRMS (ESI/QTOF) *m/z*: [M + Na]<sup>+</sup> Calcd for C<sub>27</sub>H<sub>23</sub>F<sub>4</sub>NNaO<sub>3</sub><sup>+</sup> 508.1506; Found 508.1504.

IR (ν<sub>max</sub>, cm<sup>-1</sup>) 3087 (w), 3064 (w), 3032 (m), 2952 (w), 2845 (w), 1955 (w), 1890 (w), 1715 (s), 1511 (s), 1293 (s), 1256 (s), 1224 (s), 1173 (s), 1124 (s), 993 (s), 757 (s).

**Methyl 6-benzyl-2-(4-chlorophenyl)-1-phenyl-5-(trifluoromethyl)-4-oxa-6-azaspiro[2.4]heptane-1-carboxylate (6g)**

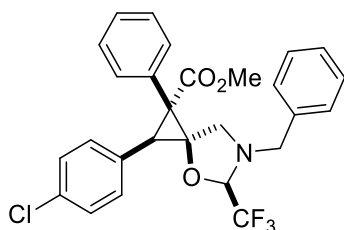

Following general procedure C, starting from **3a** (58 mg, 0.20 mmol, 1.0 equiv.), the crude product was purified by flash column chromatography (SiO<sub>2</sub>, 12 g, 3 – 15% Et<sub>2</sub>O in pentane), afford **6g** as an off-white solid (72 mg, 0.14 mmol, 72%).

Melting Point: 131 – 133 °C.

TLC: R<sub>f</sub> = 0.34 (SiO<sub>2</sub>, 10% Et<sub>2</sub>O in pentane).

<sup>1</sup>H NMR (400 MHz, CDCl<sub>3</sub>) δ 7.33 – 7.26 (m, 4H, ArH), 7.26 – 7.19 (m, 4H, ArH), 7.13 – 7.08 (m, 2H, ArH), 7.03 – 6.98 (m, 2H, ArH), 6.90 – 6.85 (m, 2H, ArH), 4.78 (q, *J* = 5.7 Hz, 1H, CHCF<sub>3</sub>), 3.90 (d, *J* = 13.2 Hz, 1H, CH<sub>2</sub>), 3.85 – 3.75 (m, 2H, CH<sub>2</sub>), 3.61 (s, 3H, CO<sub>2</sub>CH<sub>3</sub>), 3.48 – 3.40 (m, 1H, CH<sub>2</sub>), 3.18 (s, 1H, CH).

<sup>13</sup>C NMR (101 MHz, CDCl<sub>3</sub>) δ 172.6, 137.1, 132.9, 132.6, 132.5, 131.5, 130.4, 128.8, 128.8, 128.0, 127.8, 127.8, 127.7, 123.2 (q, *J*<sub>C-F</sub> = 283.8 Hz), 93.5 (q, *J*<sub>C-F</sub> = 34.4 Hz), 73.3, 60.6, 57.6, 53.2, 39.4, 39.0.

<sup>19</sup>F NMR (376 MHz, CDCl<sub>3</sub>) δ -79.39 (d, *J* = 5.6 Hz).

HRMS (nanochip-ESI/LTQ-Orbitrap) *m/z*: [M + H]<sup>+</sup> Calcd for C<sub>27</sub>H<sub>24</sub>ClF<sub>3</sub>NO<sub>3</sub><sup>+</sup> 502.1391; Found 502.1389.

IR (ν<sub>max</sub>, cm<sup>-1</sup>) 3088 (w), 3063 (w), 3030 (w), 2954 (w), 2900 (w), 1962 (w), 1904 (w), 1715 (s), 1495 (m), 1292 (s), 1254 (s), 1233 (s), 1174 (s), 1147 (s), 1123 (s), 992 (s), 764 (s).

**Methyl 6-benzyl-1-phenyl-2-(4-(trifluoromethoxy)phenyl)-5-(trifluoromethyl)-4-oxa-6-azaspiro[2.4]heptane-1-carboxylate (6h)**

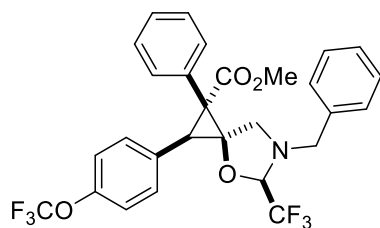

Following general procedure C, starting from **3a** (60 mg, 0.20 mmol, 1.0 equiv.), the crude product was purified by flash column chromatography (SiO<sub>2</sub>, 12 g, 5 – 10% Et<sub>2</sub>O in pentane, then SiO<sub>2</sub>, 12 g, 25-50% DCM in pentane) to afford **6h** as an off-white solid (69 mg, 0.13 mmol, 62%).

Melting Point: 144 – 146 °C.

TLC: R<sub>f</sub> = 0.22 (SiO<sub>2</sub>, 10% Et<sub>2</sub>O in pentane).

<sup>1</sup>H NMR (400 MHz, CDCl<sub>3</sub>) δ 7.31 – 7.26 (m, 4H, ArH), 7.26 – 7.18 (m, 4H, ArH), 7.03 – 6.92 (m, 6H, ArH), 4.81 (q, *J* = 5.7 Hz, 1H, CHCF<sub>3</sub>), 3.92 (d, *J* = 13.3 Hz, 1H, CH<sub>2</sub>), 3.86 – 3.76 (m, 2H, CH<sub>2</sub>, CH<sub>2</sub>), 3.62 (s, 3H, CO<sub>2</sub>CH<sub>3</sub>), 3.49 – 3.41 (m, 1H, CH<sub>2</sub>), 3.21 (s, 1H, CH).

<sup>13</sup>C NMR (101 MHz, CDCl<sub>3</sub>) δ 172.4, 147.9 (q, *J*<sub>C-F</sub> = 1.9 Hz), 136.9, 132.7, 132.6, 131.4, 130.2, 128.7, 128.6, 127.9, 127.7, 127.6, 125.9 (q, *J*<sub>C-F</sub> = 283.3 Hz), 120.5 (q, *J*<sub>C-F</sub> = 257.0 Hz), 119.9, 93.4 (q, *J*<sub>C-F</sub> = 34.2 Hz), 73.3, 60.4, 57.4, 53.0, 39.1, 39.0.

<sup>19</sup>F NMR (376 MHz, CDCl<sub>3</sub>) δ -57.82, -79.42 (d, *J* = 5.9 Hz).

HRMS (ESI/QTOF) *m/z*: [M + Na]<sup>+</sup> Calcd for C<sub>28</sub>H<sub>23</sub>F<sub>6</sub>NNaO<sub>4</sub><sup>+</sup> 574.1423; Found 574.1437.

IR (ν<sub>max</sub>, cm<sup>-1</sup>) 3060 (w), 3033 (w), 2952 (w), 2843 (w), 1717 (m), 1510 (m), 1292 (m), 1255 (s), 1223 (s), 1167 (s), 1147 (s), 992 (m), 758 (s).

**Methyl 6-benzyl-2-(4-cyanophenyl)-1-phenyl-5-(trifluoromethyl)-4-oxa-6-azaspiro[2.4]heptane-1-carboxylate (6i)**

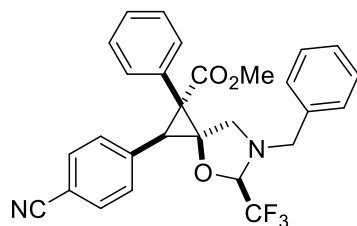

Following general procedure C, starting from **3a** (60 mg, 0.20 mmol, 1.0 equiv.), the crude product was purified by flash column chromatography (SiO<sub>2</sub>, 12 g, 2 – 15% Et<sub>2</sub>O in pentane) to afford **6i** as an off-white solid (70 mg, 0.14 mmol, 70%).

Melting Point: 128 – 129 °C.

TLC: R<sub>f</sub> = 0.24 (SiO<sub>2</sub>, 10% EtOAc in pentane).

<sup>1</sup>H NMR (400 MHz, CDCl<sub>3</sub>) δ 7.44 – 7.37 (m, 2H, ArH), 7.32 – 7.26 (m, 3H, ArH), 7.26 – 7.19 (m, 5H, ArH), 7.04 – 6.94 (m, 4H, ArH), 4.81 (q, *J* = 5.6 Hz, 1H, CHCF<sub>3</sub>), 3.90 (d, *J* = 13.3 Hz, 1H, CH<sub>2</sub>), 3.83 – 3.77 (m, 2H, CH<sub>2</sub>), 3.62 (s, 3H, CO<sub>2</sub>CH<sub>3</sub>), 3.50 – 3.41 (m, 1H, CH<sub>2</sub>), 3.22 (s, 1H, CH).

$^{13}\text{C}$  NMR (101 MHz,  $\text{CDCl}_3$ )  $\delta$  172.1, 139.9, 136.8, 132.7, 131.3, 130.8, 129.9, 128.8, 128.2, 128.0, 128.0, 127.3, 123.2 (q,  $J_{\text{C-F}} = 285.2$  Hz), 119.1, 110.3, 93.7 (q,  $J_{\text{C-F}} = 34.3$  Hz), 73.7, 60.6, 57.5, 53.3, 40.0, 39.6.

$^{19}\text{F}$  NMR (376 MHz,  $\text{CDCl}_3$ )  $\delta$  -79.36 (d,  $J = 5.5$  Hz).

HRMS (nanochip-ESI/LTQ-Orbitrap)  $m/z$ :  $[\text{M} + \text{H}]^+$  Calcd for  $\text{C}_{28}\text{H}_{24}\text{F}_3\text{N}_2\text{O}_3^+$  493.1734; Found 493.1730.

IR ( $\nu_{\text{max}}$ ,  $\text{cm}^{-1}$ ) 3087 (w), 3063 (w), 3029 (w), 2954 (w), 2847 (w), 2228 (m), 1719 (s), 1293 (s), 1256 (s), 1175 (s), 1148 (s), 1124 (s), 992 (m), 757 (s).

**Methyl 6-benzyl-2-(4-nitrophenyl)-1-phenyl-5-(trifluoromethyl)-4-oxa-6-azaspiro[2.4]heptane-1-carboxylate (6j)**

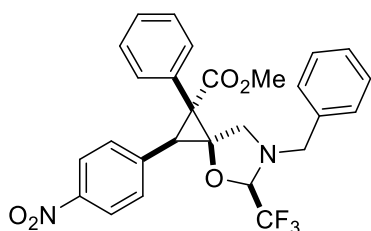

Following general procedure C, starting from **3a** (67 mg, 0.23 mmol, 1.0 equiv.), the crude product was purified by flash column chromatography ( $\text{SiO}_2$ , 12 g, 10 – 35%  $\text{Et}_2\text{O}$  in pentane) to afford **6j** as an off-white solid (67 mg, 0.13 mmol, 57%).

Melting Point: 172 – 174  $^\circ\text{C}$ .

TLC:  $R_f = 0.29$  ( $\text{SiO}_2$ , 30%  $\text{Et}_2\text{O}$  in pentane).

$^1\text{H}$  NMR (400 MHz,  $\text{CDCl}_3$ )  $\delta$  8.04 – 7.90 (m, 2H, ArH), 7.31 – 7.26 (m, 3H, ArH), 7.26 – 7.19 (m, 5H, ArH), 7.10 – 7.04 (m, 2H, ArH), 7.02 – 6.95 (m, 2H, ArH), 4.82 (q,  $J = 5.6$  Hz, 1H,  $\text{CHCF}_3$ ), 3.90 (d,  $J = 13.2$  Hz, 1H,  $\text{CH}_2$ ), 3.86 – 3.76 (m, 2H,  $\text{CH}_2$ ), 3.63 (s, 3H,  $\text{CO}_2\text{CH}_3$ ), 3.53 – 3.43 (m, 1H,  $\text{CH}_2$ ), 3.29 (s, 1H, CH).

$^{13}\text{C}$  NMR (101 MHz,  $\text{CDCl}_3$ )  $\delta$  172.1, 146.6, 142.1, 136.8, 132.6, 130.9, 129.8, 128.8 (2C), 128.2, 128.1, 128.1, 123.1 (d,  $J_{\text{C-F}} = 283.8$  Hz), 122.7, 93.7 (q,  $J_{\text{C-F}} = 34.4$  Hz), 73.8, 60.6, 57.5, 53.4, 40.3, 39.4.

$^{19}\text{F}$  NMR (376 MHz,  $\text{CDCl}_3$ )  $\delta$  -79.34 (d,  $J = 5.6$  Hz).

HRMS (ESI/QTOF)  $m/z$ :  $[\text{M} + \text{H}]^+$  Calcd for  $\text{C}_{27}\text{H}_{24}\text{F}_3\text{N}_2\text{O}_5^+$  513.1632; Found 513.1646.

IR ( $\nu_{\text{max}}$ ,  $\text{cm}^{-1}$ ) 3065 (w), 3028 (w), 2953 (w), 2849 (w), 1718 (m), 1600 (w), 1520 (m), 1345 (m), 1293 (m), 1257 (m), 1221 (m), 1176 (m), 991 (m), 858 (m), 769 (s).

**Methyl 2-(4-acetoxyphenyl)-6-benzyl-1-phenyl-5-(trifluoromethyl)-4-oxa-6-azaspiro[2.4]heptane-1-carboxylate (6k)**

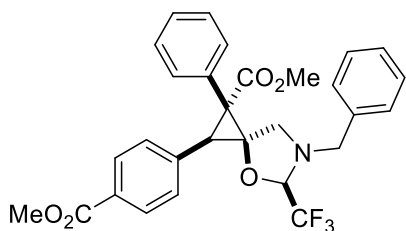

Following general procedure C, starting from **3a** (59 mg, 0.20 mmol, 1.0 equiv.), the crude product was purified by flash column chromatography (SiO<sub>2</sub>, 12 g, 5 – 15% Et<sub>2</sub>O in pentane) to afford **6k** as an off-white solid (78 mg, 0.15 mmol, 74%).

Melting Point: 130 – 131 °C.

TLC: R<sub>f</sub> = 0.25 (SiO<sub>2</sub>, 10% EtOAc in pentane).

<sup>1</sup>H NMR (400 MHz, CDCl<sub>3</sub>) δ 7.84 – 7.76 (m, 2H, ArH), 7.27 (d, *J* = 5.3 Hz, 2H, ArH), 7.26 – 7.17 (m, 6H, ArH), 7.06 – 6.95 (m, 4H, ArH), 4.79 (q, *J* = 5.6 Hz, 1H, CHCF<sub>3</sub>), 3.93 – 3.86 (m, 4H, CH<sub>2</sub>, CO<sub>2</sub>CH<sub>3</sub>), 3.80 (d, *J* = 13.2 Hz, 2H, CH<sub>2</sub>), 3.62 (s, 3H, CO<sub>2</sub>CH<sub>3</sub>), 3.48 (d, *J* = 1.5 Hz, 1H, CH<sub>2</sub>), 3.25 (s, 1H, CH).

<sup>13</sup>C NMR (101 MHz, CDCl<sub>3</sub>) δ 172.4, 167.2, 139.6, 137.0, 132.8, 130.3, 130.2, 128.8, 128.8, 128.8, 128.3, 128.1, 127.8, 127.8, 123.2 (q, *J*<sub>C-F</sub> = 283.8 Hz), 93.6 (q, *J*<sub>C-F</sub> = 34.1 Hz), 73.7, 60.6, 57.6, 53.2, 52.2, 39.9, 39.7.

<sup>19</sup>F NMR (376 MHz, CDCl<sub>3</sub>) δ -79.39 (d, *J* = 5.7 Hz).

HRMS (nanochip-ESI/LTQ-Orbitrap) *m/z*: [M + H]<sup>+</sup> Calcd for C<sub>29</sub>H<sub>27</sub>F<sub>3</sub>NO<sub>5</sub><sup>+</sup> 526.1836; Found 526.1830.

IR (ν<sub>max</sub>, cm<sup>-1</sup>) 3029 (m), 2954 (m), 2847 (w), 1717 (s), 1610 (m), 1436 (m), 1282 (s), 1175 (s), 1119 (s), 993 (s), 756 (s).

**Methyl 6-benzyl-2-(4-formylphenyl)-1-phenyl-5-(trifluoromethyl)-4-oxa-6-azaspiro[2.4]heptane-1-carboxylate (6l)**

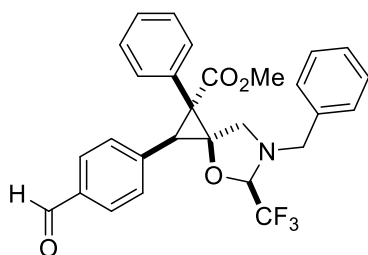

Following general procedure C, starting from **3a** (59 mg, 0.20 mmol, 1.0 equiv.), the crude product was purified by flash column chromatography (SiO<sub>2</sub>, 12 g, 5 – 15% Et<sub>2</sub>O in pentane) to afford **6l** as an off-white solid (53 mg, 0.11 mmol, 53%).

Melting Point: 133 – 134 °C.

TLC: R<sub>f</sub> = 0.27 (SiO<sub>2</sub>, 10% Et<sub>2</sub>O in pentane).

<sup>1</sup>H NMR (400 MHz, CDCl<sub>3</sub>) δ 9.94 (s, 1H, COH), 7.72 – 7.56 (m, 2H, ArH), 7.32 – 7.26 (m, 3H, ArH), 7.26 – 7.18 (m, 5H, ArH), 7.13 – 7.06 (m, 2H, ArH), 7.03 – 6.98 (m, 2H, ArH), 4.81 (q, *J* = 5.6 Hz, 1H, CHCF<sub>3</sub>), 3.95 – 3.77 (m, 3H, CH<sub>2</sub>, CH<sub>2</sub>), 3.63 (s, 3H, CO<sub>2</sub>CH<sub>3</sub>), 3.53 – 3.41 (m, 1H, CH<sub>2</sub>), 3.28 (s, 1H, CH).

<sup>13</sup>C NMR (101 MHz, CDCl<sub>3</sub>) δ 192.2, 172.3, 141.5, 136.9, 134.7, 132.7, 130.8, 130.2, 128.9, 128.8, 128.8, 128.1, 127.9, 127.9, 123.1 (q, *J*<sub>C-F</sub> = 283.6 Hz), 93.6 (q, *J*<sub>C-F</sub> = 34.3 Hz), 73.8, 60.6, 57.6, 53.3, 40.0, 40.0.

<sup>19</sup>F NMR (376 MHz, CDCl<sub>3</sub>) δ -79.36 (d, *J* = 5.6 Hz).

HRMS (ESI/QTOF) *m/z*: [M + Na]<sup>+</sup> Calcd for C<sub>28</sub>H<sub>24</sub>F<sub>3</sub>NNaO<sub>4</sub><sup>+</sup> 518.1550; Found 518.1553.

IR ( $\nu_{\max}$ ,  $\text{cm}^{-1}$ ) 3046 (w), 2984 (s), 2903 (s), 1713 (m), 1701 (s), 1606 (m), 1391 (m), 1232 (s), 1057 (s), 760 (m).

**Methyl 2-(4-acetylphenyl)-6-benzyl-1-phenyl-5-(trifluoromethyl)-4-oxa-6-azaspiro[2.4]heptane-1-carboxylate (6m)**

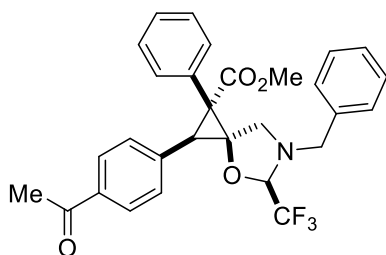

Following general procedure C, starting from **3a** (61 mg, 0.21 mmol, 1.0 equiv.), the crude product was purified by flash column chromatography ( $\text{SiO}_2$ , 12 g, 5 – 15%  $\text{Et}_2\text{O}$  in pentane) to afford **6m** as an off-white solid (62 mg, 0.12 mmol, 58%).

Melting Point: 143 – 144  $^{\circ}\text{C}$ .

TLC:  $R_f$  = 0.37 ( $\text{SiO}_2$ , 10%  $\text{Et}_2\text{O}$  in pentane).

$^1\text{H}$  NMR (400 MHz,  $\text{CDCl}_3$ )  $\delta$  7.77 – 7.69 (m, 2H, ArH), 7.31 – 7.18 (m, 8H, ArH), 7.06 – 6.97 (m, 4H, ArH), 4.79 (q,  $J$  = 5.6 Hz, 1H,  $\text{CHCF}_3$ ), 3.90 (d,  $J$  = 13.2 Hz, 1H,  $\text{CH}_2$ ), 3.80 (d,  $J$  = 13.2 Hz, 2H,  $\text{CH}_2$ ,  $\text{CH}_2$ ), 3.62 (s, 3H,  $\text{CO}_2\text{CH}_3$ ), 3.46 (dt,  $J$  = 13.3, 1.6 Hz, 1H,  $\text{CH}_2$ ), 3.27 (s, 1H, CH), 2.55 (s, 3H,  $\text{COCH}_3$ ).

$^{13}\text{C}$  NMR (101 MHz,  $\text{CDCl}_3$ )  $\delta$  198.1, 172.4, 139.8, 137.0, 135.4, 132.7, 130.4, 130.3, 128.8, 128.8, 128.1, 127.9, 127.8, 127.6, 123.1 (q,  $J_{\text{C-F}}$  = 283.1 Hz), 93.6 (q,  $J_{\text{C-F}}$  = 34.3 Hz), 73.7, 60.6, 57.6, 53.3, 39.9, 39.8, 26.7.

$^{19}\text{F}$  NMR (376 MHz,  $\text{CDCl}_3$ )  $\delta$  -79.39 (d,  $J$  = 5.5 Hz).

HRMS (nanochip-ESI/LTQ-Orbitrap)  $m/z$ :  $[\text{M} + \text{H}]^+$  Calcd for  $\text{C}_{29}\text{H}_{27}\text{F}_3\text{NO}_4^+$  510.1887; Found 510.1880.

IR ( $\nu_{\max}$ ,  $\text{cm}^{-1}$ ) 3064 (w), 3028 (w), 2954 (w), 2849 (w), 1717 (m), 1681 (m), 1606 (m), 1255 (s), 1232 (s), 1174 (s), 1147 (s), 1123 (m), 992 (m), 844 (w), 754 (s).

**Methyl 6-benzyl-2-(3-methoxyphenyl)-1-phenyl-5-(trifluoromethyl)-4-oxa-6-azaspiro[2.4]heptane-1-carboxylate (6n)**

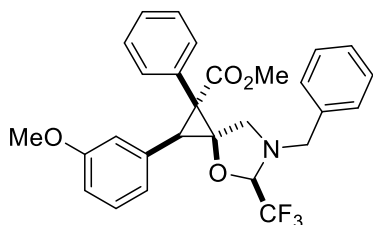

Following general procedure C, starting from **3a** (61 mg, 0.21 mmol, 1.0 equiv.), the crude product was purified by flash column chromatography ( $\text{SiO}_2$ , 12 g, 5 – 15%  $\text{Et}_2\text{O}$  in pentane), afford **6n** as an off-white solid (58 mg, 0.12 mmol, 56%).

Melting Point: 110 – 112  $^{\circ}\text{C}$ .

TLC:  $R_f$  = 0.26 ( $\text{SiO}_2$ , 10%  $\text{Et}_2\text{O}$  in pentane).

$^1\text{H}$  NMR (400 MHz,  $\text{CDCl}_3$ )  $\delta$  7.37 – 7.27 (m, 5H, ArH), 7.25 – 7.18 (m, 3H, ArH), 7.11 – 7.02 (m, 3H, ArH), 6.76 – 6.64 (m, 2H, ArH), 6.38 (dd,  $J$  = 2.6, 1.6 Hz, 1H, ArH), 4.78 (q,  $J$  = 5.6 Hz, 1H,  $\text{CHCF}_3$ ), 3.92 (d,  $J$  = 13.2 Hz, 1H,  $\text{CH}_2$ ), 3.84 (d,  $J$  = 13.2 Hz, 1H,  $\text{CH}_2$ ), 3.78 (dd,  $J$  = 13.2, 1.4 Hz, 1H,  $\text{CH}_2$ ), 3.61 (s, 3H,  $\text{CO}_2\text{CH}_3$ ), 3.50 (s, 3H,  $\text{ArOCH}_3$ ), 3.47 – 3.40 (m, 1H,  $\text{CH}_2$ ), 3.20 (s, 1H, CH).

$^{13}\text{C}$  NMR (101 MHz,  $\text{CDCl}_3$ )  $\delta$  172.7, 158.8, 137.3, 135.3, 132.9, 130.8, 128.8, 128.7, 128.5, 127.9, 127.7, 127.5, 123.2 (q,  $J_{\text{C-F}}$  = 283.0 Hz), 123.0, 115.3, 113.0, 93.5 (q,  $J_{\text{C-F}}$  = 34.1 Hz), 73.4, 60.6, 57.6, 55.0, 53.1, 40.1, 39.0.

$^{19}\text{F}$  NMR (376 MHz,  $\text{CDCl}_3$ )  $\delta$  -79.54 (d,  $J$  = 5.4 Hz).

HRMS (nanochip-ESI/LTQ-Orbitrap)  $m/z$ :  $[\text{M} + \text{H}]^+$  Calcd for  $\text{C}_{28}\text{H}_{27}\text{F}_3\text{NO}_4^+$  498.1887; Found 498.1890.

IR ( $\nu_{\text{max}}$ ,  $\text{cm}^{-1}$ ) 3088 (w), 3061 (w), 3029 (w), 3000 (w), 2956 (w), 2898 (w), 2840 (w), 1716 (s), 1600 (m), 1494 (m), 1454 (m), 1292 (s), 1232 (s), 1173 (s), 1148 (s), 1123 (s), 734 (s).

**Methyl 6-benzyl-1-phenyl-2-(o-tolyl)-5-(trifluoromethyl)-4-oxa-6-azaspiro[2.4]heptane-1-carboxylate (6o)**

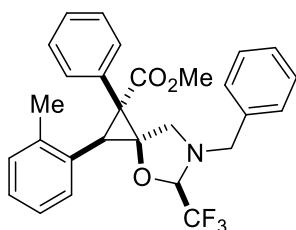

Following general procedure C, starting from **3a** (60 mg, 0.20 mmol, 1.0 equiv.), the crude product was purified by flash column chromatography ( $\text{SiO}_2$ , 12 g, 4 – 15%  $\text{Et}_2\text{O}$  in pentane) to afford **6o** as a colourless amorphous foam (26 mg, 0.053 mmol, 26%).

TLC:  $R_f$  = 0.38 ( $\text{SiO}_2$ , 10%  $\text{Et}_2\text{O}$  in pentane).

$^1\text{H}$  NMR (400 MHz,  $\text{CDCl}_3$ )  $\delta$  7.36 – 7.27 (m, 5H, ArH), 7.25 – 7.20 (m, 1H, ArH), 7.20 – 7.07 (m, 4H, ArH), 7.05 – 7.01 (m, 1H, ArH), 6.96 – 6.85 (m, 3H, ArH), 4.93 (q,  $J$  = 5.7 Hz, 1H,  $\text{CHCF}_3$ ), 4.02 (d,  $J$  = 13.2 Hz, 1H,  $\text{CH}_2$ ), 3.96 (d,  $J$  = 13.2 Hz, 1H,  $\text{CH}_2$ ), 3.88 – 3.78 (m, 1H,  $\text{CH}_2$ ), 3.64 (s, 3H,  $\text{CO}_2\text{CH}_3$ ), 3.50 – 3.39 (m, 1H,  $\text{CH}_2$ ), 3.25 (s, 1H, CH), 2.50 (s, 3H,  $\text{ArCH}_3$ ).

$^{13}\text{C}$  NMR (101 MHz,  $\text{CDCl}_3$ )  $\delta$  172.9, 138.1, 137.3, 133.4, 132.4, 131.4, 129.9, 128.9, 128.8, 128.3, 128.0, 127.6, 127.4, 126.8, 125.8, 123.2 (q,  $J_{\text{C-F}}$  = 283.7 Hz), 93.5 (q,  $J$  = 34.1 Hz), 74.4, 60.6, 58.4, 53.1, 38.6, 36.0, 20.8.

$^{19}\text{F}$  NMR (376 MHz,  $\text{CDCl}_3$ )  $\delta$  -79.2 (d,  $J$  = 5.7 Hz).

HRMS (ESI/QTOF)  $m/z$ :  $[\text{M} + \text{H}]^+$  Calcd for  $\text{C}_{28}\text{H}_{27}\text{F}_3\text{NO}_3^+$  482.1938; Found 482.1947.

IR ( $\nu_{\text{max}}$ ,  $\text{cm}^{-1}$ ) 2973 (s), 2904 (m), 1714 (s), 1496 (w), 1452 (m), 1408 (m), 1292 (s), 1236 (s), 1174 (s), 1146 (s), 1061 (s).

**Methyl 6-benzyl-2-(2-fluorophenyl)-1-phenyl-5-(trifluoromethyl)-4-oxa-6-azaspiro[2.4]heptane-1-carboxylate (6p)**

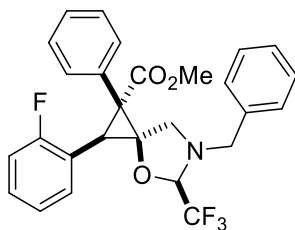

Following general procedure C, starting from **3a** (58 mg, 0.20 mmol, 1.0 equiv.), the crude product was purified by flash column chromatography (SiO<sub>2</sub>, 12 g, 4 – 15% Et<sub>2</sub>O in pentane) to afford **6p** as a white solid (59 mg, 0.12 mmol, 61%).

Melting Point: 159 – 161 °C.

TLC: R<sub>f</sub> = 0.44 (SiO<sub>2</sub>, 10% Et<sub>2</sub>O in pentane).

<sup>1</sup>H NMR (400 MHz, CDCl<sub>3</sub>) δ 7.29 – 7.25 (m, 4H, ArH), 7.25 – 7.14 (m, 4H, ArH), 7.12 – 7.00 (m, 4H, ArH), 6.72 (td, *J* = 7.5, 1.5 Hz, 1H, ArH), 6.62 (td, *J* = 7.8, 1.7 Hz, 1H, ArH), 4.82 (q, *J* = 5.6 Hz, 1H, CHCF<sub>3</sub>), 3.93 (d, *J* = 13.2 Hz, 1H, CH<sub>2</sub>), 3.84 (d, *J* = 13.2 Hz, 1H, CH<sub>2</sub>), 3.82 – 3.74 (m, 1H, CH<sub>2</sub>), 3.59 (s, 3H, CO<sub>2</sub>CH<sub>3</sub>), 3.51 (s, 1H, CH), 3.50 – 3.43 (m, 1H, CH<sub>2</sub>).

<sup>13</sup>C NMR (101 MHz, CDCl<sub>3</sub>) δ 172.4, 162.3 (d, *J*<sub>C-F</sub> = 245.7 Hz), 137.1, 132.6, 130.8, 130.6 (d, *J*<sub>C-F</sub> = 2.4 Hz), 128.9, 128.7, 128.0, 127.9, 127.7, 127.6, 123.2 (d, *J*<sub>C-F</sub> = 3.6 Hz), 123.2 (q, *J*<sub>C-F</sub> = 283.7 Hz), 121.6 (d, *J*<sub>C-F</sub> = 12.1 Hz), 114.6 (d, *J*<sub>C-F</sub> = 22.6 Hz), 93.6 (q, *J*<sub>C-F</sub> = 34.2 Hz), 73.6, 60.6, 57.7, 53.1, 38.6, 31.3 (d, *J*<sub>C-F</sub> = 7.2 Hz).

<sup>19</sup>F NMR (376 MHz, CDCl<sub>3</sub>) δ -79.3 (d, *J* = 5.6 Hz), -117.2 – -117.9 (m).

HRMS (Sicrit plasma/LTQ-Orbitrap) *m/z*: [M + H]<sup>+</sup> Calcd for C<sub>27</sub>H<sub>24</sub>F<sub>4</sub>NO<sub>3</sub><sup>+</sup> 486.1687; Found 486.1688.

IR (ν<sub>max</sub>, cm<sup>-1</sup>) 2975 (s), 2901 (m), 1717 (m), 1496 (m), 1453 (m), 1293 (m), 1237 (s), 1176 (s), 1147 (s), 1122 (s), 1058 (s), 912 (m).

**Methyl 6-benzyl-1-phenyl-5-(trifluoromethyl)-2-(2-(trifluoromethyl)phenyl)-4-oxa-6-azaspiro[2.4]heptane-1-carboxylate (6q)**

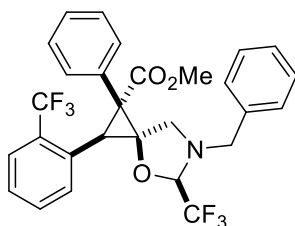

Following general procedure C, starting from **3a** (59 mg, 0.20, 1.0 equiv.), the crude product was purified by flash column chromatography (SiO<sub>2</sub>, 12 g, 5 – 10% Et<sub>2</sub>O in pentane, then SiO<sub>2</sub>, 12 g, 25 – 50% DCM in pentane) to afford **6q** as an off-white solid (29 mg, 0.054 mmol, 27%).

Melting Point: 138 – 139 °C.

TLC: R<sub>f</sub> = 0.43 (SiO<sub>2</sub>, 10% DCM in pentane).

<sup>1</sup>H NMR (400 MHz, CDCl<sub>3</sub>) δ 7.70 (dd, *J* = 7.9, 1.4 Hz, 1H, ArH), 7.31 – 7.27 (m, 4H, ArH), 7.26 – 7.08 (m, 6H, ArH), 7.00 – 6.92 (m, 3H, ArH), 4.89 (q, *J* = 5.7 Hz, 1H, CHCF<sub>3</sub>), 3.97 – 3.84 (m, 2H, CH<sub>2</sub>), 3.84 – 3.78 (m, 1H, CH<sub>2</sub>), 3.62 (s, 3H, CO<sub>2</sub>CH<sub>3</sub>), 3.54 (s, 1H, CH), 3.53 – 3.47 (m, 1H, CH<sub>2</sub>).

<sup>13</sup>C NMR (101 MHz, CDCl<sub>3</sub>) δ 172.0, 137.1, 133.3, 132.6, 131.0, 130.7, 130.4 (q, *J*<sub>C-F</sub> = 29.2 Hz), 130.4, 128.9, 128.8, 128.0, 127.7, 127.7, 126.4, 125.7 (q, *J*<sub>C-F</sub> = 5.9 Hz), 124.8 (q, *J*<sub>C-F</sub> =

273.9 Hz), 123.2 (q,  $J_{C-F}$  = 283.7 Hz), 93.8 (q,  $J_{C-F}$  = 34.4 Hz), 74.2, 60.6, 58.1, 53.2, 39.7, 34.9 (q,  $J_{C-F}$  = 2.2 Hz).

$^{19}\text{F}$  NMR (376 MHz,  $\text{CDCl}_3$ )  $\delta$  -59.4, -79.4 (d,  $J$  = 5.4 Hz).

HRMS (APCI/QTOF)  $m/z$ :  $[\text{M} + \text{H}]^+$  Calcd for  $\text{C}_{28}\text{H}_{24}\text{F}_6\text{NO}_3^+$  536.1655; Found 536.1648.

IR ( $\nu_{\text{max}}$ ,  $\text{cm}^{-1}$ ) 3068 (w), 3031 (w), 2956 (w), 2902 (w), 2848 (w), 1721 (m), 1313 (s), 1294 (s), 1236 (s), 1159 (s), 1120 (s), 1062 (m), 1036 (m), 991 (m), 770 (s).

**Methyl 6-benzyl-2-(4-fluoro-3-(methoxycarbonyl)phenyl)-1-phenyl-5-(trifluoromethyl)-4-oxa-6-azaspiro[2.4]heptane-1-carboxylate (6r)**

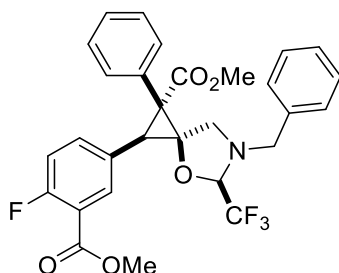

Following general procedure C, starting from **3a** (57 mg, 0.19 mmol, 1.0 equiv.), the crude product was purified by flash column chromatography ( $\text{SiO}_2$ , 12 g, 3 – 15%  $\text{Et}_2\text{O}$  in pentane), afford **6r** as an off-white solid (62 mg, 0.11 mmol, 59%).

Melting Point: 54 – 55  $^\circ\text{C}$ .

TLC:  $R_f$  = 0.10 ( $\text{SiO}_2$ , 10%  $\text{Et}_2\text{O}$  in pentane).

$^1\text{H}$  NMR (400 MHz,  $\text{CDCl}_3$ )  $\delta$  7.79 – 7.71 (m, 1H, ArH), 7.32 – 7.26 (m, 4H, ArH), 7.26 – 7.18 (m, 4H, ArH), 7.02 – 6.94 (m, 2H, ArH), 6.82 – 6.76 (m, 2H, ArH), 4.81 (q,  $J$  = 5.7 Hz, 1H,  $\text{CHCF}_3$ ), 3.95 – 3.88 (m, 4H,  $\text{CH}_2$ ,  $\text{CO}_2\text{CH}_3$ ), 3.86 – 3.77 (m, 2H,  $\text{CH}_2$ ), 3.62 (s, 3H,  $\text{CO}_2\text{CH}_3$ ), 3.51 – 3.40 (m, 1H,  $\text{CH}_2$ ), 3.23 (s, 1H, CH).

$^{13}\text{C}$  NMR (101 MHz,  $\text{CDCl}_3$ )  $\delta$  172.4, 165.0 (d,  $J_{C-F}$  = 3.8 Hz), 160.8 (d,  $J_{C-F}$  = 259.8 Hz), 137.0, 135.4 (d,  $J_{C-F}$  = 8.8 Hz), 134.3, 132.9, 130.2, 130.1 (d,  $J_{C-F}$  = 3.8 Hz), 128.9, 128.8, 128.1, 127.9, 127.8, 123.1 (q,  $J_{C-F}$  = 283.8 Hz), 117.8 (d,  $J_{C-F}$  = 10.2 Hz), 116.2 (d,  $J_{C-F}$  = 22.5 Hz), 93.6 (q,  $J_{C-F}$  = 34.3 Hz), 73.3, 60.6, 57.6, 53.2, 52.5, 39.0, 38.8.

$^{19}\text{F}$  NMR (376 MHz,  $\text{CDCl}_3$ )  $\delta$  -79.4 (d,  $J$  = 5.6 Hz), -112.6 (q,  $J$  = 7.3 Hz).

HRMS (ESI/QTOF)  $m/z$ :  $[\text{M} + \text{Na}]^+$  Calcd for  $\text{C}_{29}\text{H}_{25}\text{F}_4\text{NNaO}_5^+$  566.1561; Found 566.1572.

IR ( $\nu_{\text{max}}$ ,  $\text{cm}^{-1}$ ) 3063 (w), 3032 (w), 2953 (w), 2847 (w), 1718 (s), 1612 (w), 1501 (m), 1441 (m), 1296 (s), 1230 (s), 1146 (s), 988 (m), 765 (s).

**Methyl 6-benzyl-2-(2-methyl-5-nitrophenyl)-1-phenyl-5-(trifluoromethyl)-4-oxa-6-azaspiro[2.4]heptane-1-carboxylate (6s)**

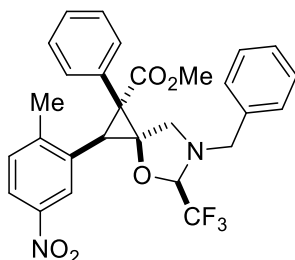



Following general procedure C, starting from **3a** (58 mg, 0.20 mmol, 1.0 equiv.), the crude product was purified by flash column chromatography (SiO<sub>2</sub>, 12 g, 5 – 25% Et<sub>2</sub>O in pentane) to afford **6s** as an off-white solid (49 mg, 0.092 mmol, 46%).

Melting Point: 127 – 128 °C.

TLC: R<sub>f</sub> = 0.13 (SiO<sub>2</sub>, 10% Et<sub>2</sub>O in pentane).

<sup>1</sup>H NMR (400 MHz, CDCl<sub>3</sub>) δ 7.93 (dd, *J* = 8.4, 2.4 Hz, 1H, ArH), 7.80 (d, *J* = 2.4 Hz, 1H, ArH), 7.35 – 7.26 (m, 5H, ArH), 7.25 – 7.10 (m, 4H, ArH), 6.94 – 6.87 (m, 2H, ArH), 5.05 (q, *J* = 5.7 Hz, 1H, CHCF<sub>3</sub>), 4.06 – 3.92 (m, 2H, CH<sub>2</sub>), 3.90 – 3.80 (m, 1H, CH<sub>2</sub>), 3.66 (s, 3H, CO<sub>2</sub>CH<sub>3</sub>), 3.53 – 3.39 (m, 1H, CH<sub>2</sub>), 3.21 (s, 1H, CH), 2.57 (s, 3H, ArCH<sub>3</sub>).

<sup>13</sup>C NMR (101 MHz, CDCl<sub>3</sub>) δ 172.4, 146.1, 145.7, 136.8, 135.2, 132.0, 130.4, 130.3, 129.0, 128.8, 128.1, 127.9, 127.9, 123.5, 123.1 (q, *J*<sub>C-F</sub> = 283.6 Hz), 121.6, 93.7 (q, *J*<sub>C-F</sub> = 34.3 Hz), 74.3, 60.6, 58.2, 53.3, 39.5, 34.7, 21.1.

<sup>19</sup>F NMR (376 MHz, CDCl<sub>3</sub>) δ -79.1 (d, *J* = 5.6 Hz).

HRMS (ESI/QTOF) *m/z*: [M + Na]<sup>+</sup> Calcd for C<sub>28</sub>H<sub>25</sub>F<sub>3</sub>N<sub>2</sub>NaO<sub>5</sub><sup>+</sup> 549.1608; Found 549.1613.

IR (ν<sub>max</sub>, cm<sup>-1</sup>) 3062 (w), 2984 (s), 2903 (s), 1716 (s), 1521 (s), 1347 (s), 1238 (s), 1061 (s), 756 (s).

**Methyl 6-benzyl-2-(3,5-bis(trifluoromethyl)phenyl)-1-phenyl-5-(trifluoromethyl)-4-oxa-6-azaspiro[2.4]heptane-1-carboxylate (6t)**

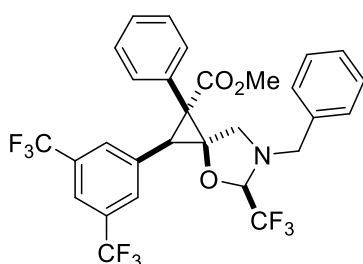

Following general procedure C, starting from **3a** (61 mg, 0.21 mmol, 1.0 equiv.), the crude product was purified by flash column chromatography (SiO<sub>2</sub>, 12 g, 3 – 10% Et<sub>2</sub>O in pentane, then SiO<sub>2</sub>, 12 g 25 – 45% DCM in pentane) to afford **6t** as an off-white solid (51 mg, 0.084 mmol, 40%).

Melting Point: 85 – 86 °C.

TLC: R<sub>f</sub> = 0.38 (SiO<sub>2</sub>, 10% Et<sub>2</sub>O in pentane).

<sup>1</sup>H NMR (400 MHz, CDCl<sub>3</sub>) δ 7.68 – 7.62 (m, 1H, ArH), 7.30 – 7.16 (m, 10H, ArH), 6.97 – 6.91 (m, 2H, ArH), 4.88 (q, *J* = 5.6 Hz, 1H, CHCF<sub>3</sub>), 3.93 (d, *J* = 13.5 Hz, 1H, CH<sub>2</sub>), 3.88 – 3.78 (m, 2H, CH<sub>2</sub>), 3.64 (s, 3H, CO<sub>2</sub>CH<sub>3</sub>), 3.54 – 3.47 (m, 1H, CH<sub>2</sub>), 3.24 (s, 1H, CH).

<sup>13</sup>C NMR (101 MHz, CDCl<sub>3</sub>) δ 172.0, 136.8, 136.7, 132.6, 130.6 (q, *J*<sub>C-F</sub> = 33.2 Hz), 130.2 (q, *J*<sub>C-F</sub> = 3.7 Hz), 129.3, 128.8, 128.8, 128.2, 128.1, 128.1, 123.3 (q, *J*<sub>C-F</sub> = 272.8 Hz), 123.1 (q, *J*<sub>C-F</sub> = 283.0 Hz), 120.4 – 120.1 (m), 93.8 (q, *J*<sub>C-F</sub> = 34.5 Hz), 73.6, 60.5, 57.4, 53.4, 40.0, 39.0.

<sup>19</sup>F NMR (376 MHz, CDCl<sub>3</sub>) δ -63.1, -79.4 (d, *J* = 5.5 Hz).

HRMS (ESI/QTOF) *m/z*: [M + Na]<sup>+</sup> Calcd for C<sub>29</sub>H<sub>22</sub>F<sub>9</sub>NNaO<sub>3</sub><sup>+</sup> 626.1348; Found 626.1349.

IR (ν<sub>max</sub>, cm<sup>-1</sup>) 3031 (w), 2848 (w), 1719 (m), 1369 (m), 1279 (s), 1258 (m), 1236 (m), 1176 (s), 1132 (s), 983 (m).

**Methyl 6-benzyl-1-phenyl-2-(quinolin-6-yl)-5-(trifluoromethyl)-4-oxa-6-azaspiro[2.4]heptane-1-carboxylate (6u)**

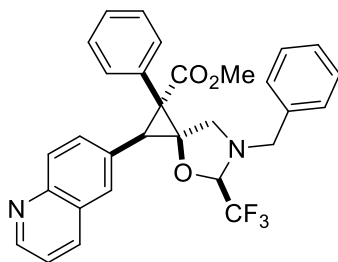

Following general procedure C, starting from **3a** (59 mg, 0.20 mmol, 1.0 equiv.), the crude product was purified by flash column chromatography (SiO<sub>2</sub>, 12 g, 15 – 40% Et<sub>2</sub>O in pentane) to afford **6u** as an off-white solid (61 mg, 0.12 mmol, 59%).

Melting Point: 165 – 167 °C.

TLC: R<sub>f</sub> = 0.27 (SiO<sub>2</sub>, 30% EtOAc in pentane).

<sup>1</sup>H NMR (400 MHz, CDCl<sub>3</sub>) δ 8.86 (dd, *J* = 4.3, 1.7 Hz, 1H, *ArH*), 7.94 (dd, *J* = 8.5, 1.7 Hz, 1H, *ArH*), 7.88 (d, *J* = 8.8 Hz, 1H, *ArH*), 7.41 – 7.30 (m, 3H, *ArH*), 7.27 – 7.15 (m, 8H, *ArH*), 7.08 – 6.99 (m, 2H, *ArH*), 4.84 (q, *J* = 5.6 Hz, 1H, *CHCF*<sub>3</sub>), 3.98 – 3.78 (m, 3H, *CH*<sub>2</sub>, *CH*<sub>2</sub>), 3.64 (s, 3H, *CO*<sub>2</sub>*CH*<sub>3</sub>), 3.57 – 3.49 (m, 1H, *CH*<sub>2</sub>), 3.41 (s, 1H, *CH*).

<sup>13</sup>C NMR (101 MHz, CDCl<sub>3</sub>) δ 172.5, 150.2, 147.2, 137.0, 136.1, 132.9, 132.7, 132.0, 130.4, 129.0, 128.8, 128.7, 128.3, 128.0, 127.8, 127.7, 127.7, 123.2 (q, *J*<sub>C-F</sub> = 283.7 Hz), 121.2, 93.6 (q, *J*<sub>C-F</sub> = 34.2 Hz), 73.7, 60.6, 57.7, 53.2, 39.9, 39.5.

<sup>19</sup>F NMR (376 MHz, CDCl<sub>3</sub>) δ -79.3 (d, *J* = 5.6 Hz).

HRMS (nanochip-ESI/LTQ-Orbitrap) *m/z*: [M + H]<sup>+</sup> Calcd for C<sub>30</sub>H<sub>26</sub>F<sub>3</sub>N<sub>2</sub>O<sub>3</sub><sup>+</sup> 519.1890; Found 519.1884.

IR (ν<sub>max</sub>, cm<sup>-1</sup>) 3033 (w), 2957 (w), 2901 (w), 1715 (s), 1501 (m), 1291 (m), 1234 (s), 1174 (s), 1147 (s), 1123 (s), 994 (m).

**Methyl 6-benzyl-1-phenyl-2-(pyridin-4-yl)-5-(trifluoromethyl)-4-oxa-6-azaspiro[2.4]heptane-1-carboxylate (6v)**

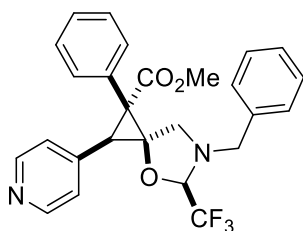

Following general procedure C, starting from **3a** (59 mg, 0.20 mmol, 1.0 equiv.), the crude product was purified by flash column chromatography (SiO<sub>2</sub>, 12 g, 15 – 50% EtOAc in pentane) to afford **6v** as an off-white solid (41 mg, 0.088 mmol, 44%).

Melting Point: 143 – 144 °C.

TLC: R<sub>f</sub> = 0.30 (SiO<sub>2</sub>, 30% EtOAc in pentane).

<sup>1</sup>H NMR (400 MHz, CDCl<sub>3</sub>) δ 8.39 – 8.28 (m, 2H, *ArH*), 7.31 – 7.20 (m, 8H, *ArH*), 7.05 – 6.93 (m, 2H, *ArH*), 6.86 – 6.74 (m, 2H, *ArH*), 4.80 (q, *J* = 5.6 Hz, 1H, *CHCF*<sub>3</sub>), 3.94 – 3.75 (m, 3H, *CH*<sub>2</sub>, *CH*<sub>2</sub>), 3.62 (s, 3H, *CO*<sub>2</sub>*CH*<sub>3</sub>), 3.50 – 3.41 (m, 1H, *CH*<sub>2</sub>), 3.14 (s, 1H, *CH*).

$^{13}\text{C}$  NMR (101 MHz,  $\text{CDCl}_3$ )  $\delta$  172.1, 149.0, 143.2, 136.9, 132.6, 129.9, 129.8, 128.8, 128.8, 128.1, 128.0, 125.2, 123.1 (q,  $J_{\text{C-F}} = 284.4$  Hz), 93.6 (q,  $J_{\text{C-F}} = 33.3$  Hz), 73.6, 60.6, 57.4, 53.3, 39.8, 38.8.

$^{19}\text{F}$  NMR (376 MHz,  $\text{CDCl}_3$ )  $\delta$  -79.4 (d,  $J = 6.8$  Hz).

HRMS (APCI/QTOF)  $m/z$ :  $[\text{M} + \text{H}]^+$  Calcd for  $\text{C}_{26}\text{H}_{24}\text{F}_3\text{N}_2\text{O}_3^+$  469.1734; Found 469.1729.

IR ( $\nu_{\text{max}}$ ,  $\text{cm}^{-1}$ ) 3028 (w), 2955 (m), 1718 (s), 1599 (m), 1498 (w), 1292 (m), 1238 (s), 1175 (s), 993 (m), 770 (s).

**Methyl 6-benzyl-2-(2-fluoropyridin-4-yl)-1-phenyl-5-(trifluoromethyl)-4-oxa-6-azaspiro[2.4]heptane-1-carboxylate (6w)**

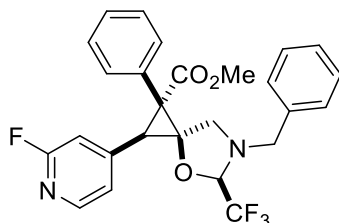

Following general procedure C, starting from **3a** (60 mg, 0.20 mmol, 1.0 equiv.), the crude product was purified by flash column chromatography ( $\text{SiO}_2$ , 12 g, 5 – 15%  $\text{Et}_2\text{O}$  in pentane), afford **6w** as an off-white solid (57 mg, 0.12 mmol, 57%).

Melting Point: 171 – 172  $^\circ\text{C}$ .

TLC:  $R_f = 0.28$  ( $\text{SiO}_2$ , 10%  $\text{Et}_2\text{O}$  in pentane).

$^1\text{H}$  NMR (400 MHz,  $\text{CDCl}_3$ )  $\delta$  7.94 (d,  $J = 5.3$  Hz, 1H, ArH), 7.32 – 7.18 (m, 8H, ArH), 7.04 – 6.92 (m, 2H, ArH), 6.72 (dt,  $J = 5.3, 1.6$  Hz, 1H, ArH), 6.41 (d,  $J = 1.3$  Hz, 1H, ArH), 4.84 (q,  $J = 5.6$  Hz, 1H,  $\text{CHCF}_3$ ), 3.90 (d,  $J = 13.3$  Hz, 1H,  $\text{CH}_2$ ), 3.85 – 3.76 (m, 2H,  $\text{CH}_2$ ,  $\text{CH}_2$ ), 3.62 (s, 3H,  $\text{CO}_2\text{CH}_3$ ), 3.49 – 3.41 (m, 1H,  $\text{CH}_2$ ), 3.16 (s, 1H, CH).

$^{13}\text{C}$  NMR (101 MHz,  $\text{CDCl}_3$ )  $\delta$  171.8, 163.4 (d,  $J_{\text{C-F}} = 237.2$  Hz), 149.1 (d,  $J_{\text{C-F}} = 8.7$  Hz), 146.4 (d,  $J_{\text{C-F}} = 15.3$  Hz), 136.7, 132.4, 129.5, 128.8 (2C), 128.2, 128.1, 123.0 (q,  $J_{\text{C-F}} = 283.7$  Hz), 122.9, 122.9, 110.6 (d,  $J_{\text{C-F}} = 38.9$  Hz), 110.4, 93.8 (q,  $J_{\text{C-F}} = 34.5$  Hz), 73.7, 60.6, 57.3, 53.4, 40.3, 38.5 (d,  $J_{\text{C-F}} = 3.5$  Hz).

$^{19}\text{F}$  NMR (376 MHz,  $\text{CDCl}_3$ )  $\delta$  -68.9, -79.4 (d,  $J = 5.6$  Hz).

HRMS (ESI/QTOF)  $m/z$ :  $[\text{M} + \text{H}]^+$  Calcd for  $\text{C}_{26}\text{H}_{23}\text{F}_4\text{N}_2\text{O}_3^+$  487.1639; Found 487.1647.

IR ( $\nu_{\text{max}}$ ,  $\text{cm}^{-1}$ ) 3068 (w), 3032 (w), 2954 (w), 2918 (w), 2848 (w), 1719 (m), 1611 (m), 1553 (m), 1292 (m), 1220 (s), 1150 (s), 1124 (m), 995 (m), 770 (s).

**Methyl 6-benzyl-1-phenyl-2-(thiophen-2-yl)-5-(trifluoromethyl)-4-oxa-6-azaspiro[2.4]heptane-1-carboxylate (6x)**

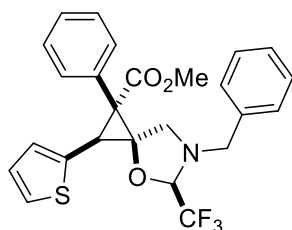

Following general procedure C, starting from **3a** (61 mg, 0.21 mmol, 1.0 equiv.), the crude product was purified by flash column chromatography (SiO<sub>2</sub>, 12 g, 5 – 15% Et<sub>2</sub>O in pentane) to afford **6x** as an off-white solid (31 mg, 0.065 mmol, 31%).

Melting Point: 109 – 110 °C.

TLC: R<sub>f</sub> = 0.26 (SiO<sub>2</sub>, 10% Et<sub>2</sub>O in pentane).

<sup>1</sup>H NMR (400 MHz, CDCl<sub>3</sub>) δ 7.35 – 7.27 (m, 5H, ArH), 7.24 – 7.16 (m, 3H, ArH), 7.11 (dd, *J* = 5.2, 1.2 Hz, 1H, ArH), 7.09 – 7.04 (m, 2H, ArH), 6.89 (dd, *J* = 5.1, 3.6 Hz, 1H, ArH), 6.81 (dd, *J* = 3.7, 1.2 Hz, 1H, ArH), 4.86 (q, *J* = 5.6 Hz, 1H, CHCF<sub>3</sub>), 3.97 (d, *J* = 13.1 Hz, 1H, CH<sub>2</sub>), 3.89 (d, *J* = 13.1 Hz, 1H, CH<sub>2</sub>), 3.84 – 3.77 (m, 1H, CH<sub>2</sub>), 3.62 (s, 3H, CO<sub>2</sub>CH<sub>3</sub>), 3.56 (s, 1H, CH), 3.52 – 3.45 (m, 1H, CH<sub>2</sub>).

<sup>13</sup>C NMR (101 MHz, CDCl<sub>3</sub>) δ 172.3, 137.2, 135.0, 132.6, 130.7, 128.9, 128.7, 128.0, 127.9, 127.6, 127.6, 126.3, 125.2, 123.1 (q, *J*<sub>C-F</sub> = 283.5 Hz), 93.4 (q, *J*<sub>C-F</sub> = 34.3 Hz), 73.1, 60.6, 57.2, 53.1, 39.0, 36.1.

<sup>19</sup>F NMR (376 MHz, CDCl<sub>3</sub>) δ -79.5 (d, *J* = 5.5 Hz).

HRMS (nanochip-ESI/LTQ-Orbitrap) *m/z*: [M + H]<sup>+</sup> Calcd for C<sub>25</sub>H<sub>23</sub>F<sub>3</sub>NO<sub>3</sub>S<sup>+</sup> 474.1345; Found 474.1342.

IR (ν<sub>max</sub>, cm<sup>-1</sup>) 3085 (m), 3064 (m), 3031 (m), 2952 (m), 2845 (m), 1956 (w), 1880 (w), 1805 (w), 1714 (s), 1437 (m), 1292 (s), 1233 (s), 1174 (s), 1146 (s), 1122 (s), 991 (s), 758 (s).

**Methyl 6-benzyl-1-(4-chlorophenyl)-5-(trifluoromethyl)-2-(4-(trifluoromethyl)phenyl)-4-oxa-6-azaspiro[2.4]heptane-1-carboxylate (7aa)**

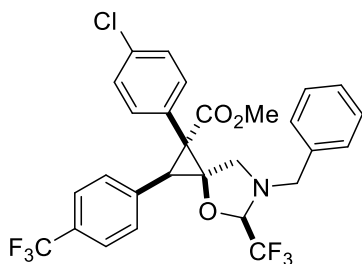

Following general procedure C, starting from **3b** (66 mg, 0.20 mmol, 1.0 equiv.), the crude product was purified by flash column chromatography (SiO<sub>2</sub>, 12 g, 5 – 15% Et<sub>2</sub>O in pentane) to afford **7aa** as an off-white solid (85 mg, 0.15 mmol, 75%).

Gram scale procedure: prepared according to the general procedure C using **3b** (1.02 g, 3.10 mmol, 1.00 equiv.), in anhydrous DCE (15.5 mL, 0.2 M). The crude material was purified by flash column chromatography (SiO<sub>2</sub>, 40 g, 3 – 15% Et<sub>2</sub>O in pentane) to afford **7aa** as an off-white solid (1.03 g, 1.81 mmol, 58%).

Melting Point: 149 – 151 °C.

TLC: R<sub>f</sub> = 0.29 (SiO<sub>2</sub>, 10% Et<sub>2</sub>O in pentane).

<sup>1</sup>H NMR (400 MHz, CDCl<sub>3</sub>) δ 7.41 (d, *J* = 8.2 Hz, 2H, ArH), 7.30 – 7.22 (m, 5H, ArH), 7.22 – 7.17 (m, 2H, ArH), 7.05 (d, *J* = 8.2 Hz, 2H, ArH), 6.94 – 6.87 (m, 2H, ArH), 4.81 (q, *J* = 5.6 Hz, 1H, CHCF<sub>3</sub>), 3.89 (d, *J* = 13.3 Hz, 1H, CH<sub>2</sub>), 3.84 – 3.75 (m, 2H, CH<sub>2</sub>, CH<sub>2</sub>), 3.62 (s, 3H, CO<sub>2</sub>CH<sub>3</sub>), 3.50 – 3.41 (m, 1H, CH<sub>2</sub>), 3.24 (s, 1H, CH).

<sup>13</sup>C NMR (101 MHz, CDCl<sub>3</sub>) δ 171.9, 137.9 (q, *J*<sub>C-F</sub> = 1.5 Hz), 136.9, 134.1, 134.0, 130.5, 129.3 (q, *J*<sub>C-F</sub> = 32.2 Hz), 128.8, 128.8, 128.8, 128.3, 128.1, 124.6 (q, *J*<sub>C-F</sub> = 3.8 Hz), 124.3 (q, *J*<sub>C-F</sub> = 271.9 Hz), 123.1 (q, *J*<sub>C-F</sub> = 283.6 Hz), 93.7 (q, *J*<sub>C-F</sub> = 34.3 Hz), 73.5, 60.6, 57.5, 53.3, 39.5, 38.9.

$^{19}\text{F}$  NMR (376 MHz,  $\text{CDCl}_3$ )  $\delta$  -62.5, -79.4 (d,  $J$  = 5.6 Hz).

HRMS (nanochip-ESI/LTQ-Orbitrap)  $m/z$ :  $[\text{M} + \text{H}]^+$  Calcd for  $\text{C}_{28}\text{H}_{23}\text{ClF}_6\text{NO}_3^+$  570.1265; Found 570.1261.

IR ( $\nu_{\text{max}}$ ,  $\text{cm}^{-1}$ ) 3066 (w), 3032 (w), 2954 (w), 2849 (w), 1720 (m), 1619 (m), 1495 (m), 1326 (s), 1256 (s), 1236 (s), 1169 (s), 1120 (s), 1015 (m), 912 (m), 732 (s).

**Methyl 6-benzyl-1-(4-chlorophenyl)-2-(4-(methoxycarbonyl)phenyl)-5-(trifluoromethyl)-4-oxa-6-azaspiro[2.4]heptane-1-carboxylate (7ab)**

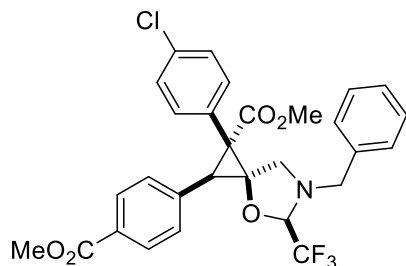

Following general procedure C, starting from **3b** (66 mg, 0.20 mmol, 1.0 equiv.), the crude product was purified by flash column chromatography ( $\text{SiO}_2$ , 12 g, 5 – 20%  $\text{Et}_2\text{O}$  in pentane) to afford **7ab** as an off-white solid (99 mg, 0.18 mmol, 87%).

Melting Point: 161 – 163  $^\circ\text{C}$ .

TLC:  $R_f$  = 0.14 ( $\text{SiO}_2$ , 10%  $\text{Et}_2\text{O}$  in pentane).

$^1\text{H}$  NMR (400 MHz,  $\text{CDCl}_3$ )  $\delta$  7.86 – 7.78 (m, 2H, ArH), 7.32 – 7.21 (m, 5H, ArH), 7.21 – 7.15 (m, 2H, ArH), 7.06 – 6.99 (m, 2H, ArH), 6.94 – 6.88 (m, 2H, ArH), 4.82 (q,  $J$  = 5.6 Hz, 1H,  $\text{CHCF}_3$ ), 3.94 – 3.87 (m, 4H,  $\text{CO}_2\text{CH}_3$ ,  $\text{CH}_2$ ), 3.84 – 3.76 (m, 2H,  $\text{CH}_2$ ,  $\text{CH}_2$ ), 3.62 (s, 3H,  $\text{CO}_2\text{CH}_3$ ), 3.51 – 3.42 (m, 1H,  $\text{CH}_2$ ), 3.25 (s, 1H, CH).

$^{13}\text{C}$  NMR (101 MHz,  $\text{CDCl}_3$ )  $\delta$  171.9, 167.1, 139.2, 136.9, 134.1, 133.9, 130.2, 128.9, 128.9, 128.8, 128.8, 128.6, 128.2, 128.1, 123.1 (q,  $J_{\text{C-F}}$  = 283.6 Hz), 93.6 (q,  $J_{\text{C-F}}$  = 34.3 Hz), 73.7, 60.5, 57.5, 53.3, 52.2, 39.8, 39.0.

$^{19}\text{F}$  NMR (376 MHz,  $\text{CDCl}_3$ )  $\delta$  -79.3 (d,  $J$  = 5.7 Hz).

HRMS (nanochip-ESI/LTQ-Orbitrap)  $m/z$ :  $[\text{M} + \text{H}]^+$  Calcd for  $\text{C}_{29}\text{H}_{26}\text{ClF}_3\text{NO}_5^+$  560.1446; Found 560.1439.

IR ( $\nu_{\text{max}}$ ,  $\text{cm}^{-1}$ ) 3030 (w), 2953 (w), 2846 (w), 1718 (s), 1610 (w), 1495 (m), 1436 (m), 1282 (s), 1176 (s), 990 (m), 758 (s), 729 (s).

**Methyl 6-benzyl-1-(4-chlorophenyl)-2-(pyridin-4-yl)-5-(trifluoromethyl)-4-oxa-6-azaspiro[2.4]heptane-1-carboxylate (7ac)**

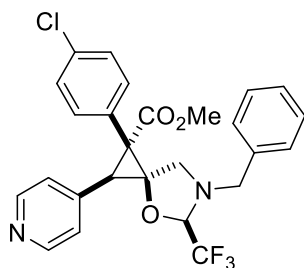

Following general procedure C, starting from **3b** (67 mg, 0.20 mmol, 1.0 equiv.), the crude product was purified by flash column chromatography (SiO<sub>2</sub>, 12 g, 15 – 50% Et<sub>2</sub>O in pentane), afford **7ac** as an off-white solid (56 mg, 0.11 mmol, 54%).

Melting Point: 153 – 155 °C.

TLC: R<sub>f</sub> = 0.22 (SiO<sub>2</sub>, 50% Et<sub>2</sub>O in pentane).

<sup>1</sup>H NMR (400 MHz, CDCl<sub>3</sub>) δ 8.41 – 8.32 (m, 2H, ArH), 7.31 – 7.27 (m, 1H, ArH), 7.25 – 7.18 (m, 4H, ArH), 6.94 – 6.88 (m, 2H, ArH), 6.87 – 6.78 (m, 2H, ArH), 4.82 (q, *J* = 5.6 Hz, 1H, CHCF<sub>3</sub>), 3.89 (d, *J* = 13.2 Hz, 1H, CH<sub>2</sub>), 3.83 – 3.75 (m, 2H, CH<sub>2</sub>, CH<sub>2</sub>), 3.63 (s, 3H, CO<sub>2</sub>CH<sub>3</sub>), 3.50 – 3.41 (m, 1H, CH<sub>2</sub>), 3.13 (s, 1H, CH).

<sup>13</sup>C NMR (101 MHz, CDCl<sub>3</sub>) δ 171.6, 149.1, 142.9, 136.7, 134.1, 133.9, 128.8, 128.8, 128.5, 128.4, 128.2, 125.1, 123.1 (q, *J*<sub>C-F</sub> = 283.9 Hz), 93.7 (q, *J*<sub>C-F</sub> = 34.6 Hz), 73.6, 60.5, 57.4, 53.4, 39.2, 38.8.

<sup>19</sup>F NMR (376 MHz, CDCl<sub>3</sub>) δ -79.4 (d, *J* = 5.5 Hz).

HRMS (ESI/QTOF) *m/z*: [M + H]<sup>+</sup> Calcd for C<sub>26</sub>H<sub>23</sub>ClF<sub>3</sub>N<sub>2</sub>O<sub>3</sub><sup>+</sup> 503.1344; Found 503.1357.

IR (ν<sub>max</sub>, cm<sup>-1</sup>) 3060 (w), 2976 (s), 2902 (s), 1721 (m), 1598 (m), 1406 (m), 1239 (s), 1176 (s), 1058 (s), 993 (m), 768 (s).

**Methyl 6-benzyl-1-(4-methoxyphenyl)-5-(trifluoromethyl)-2-(4-(trifluoromethyl)phenyl)-4-oxa-6-azaspiro[2.4]heptane-1-carboxylate (7b)**

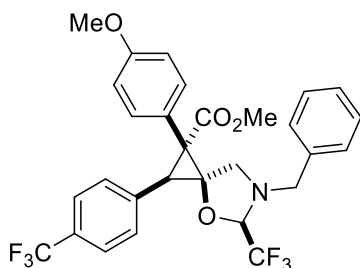

Following general procedure C, starting from **3c** (62 mg, 0.19 mmol, 1.0 equiv.), the crude product was purified by flash column chromatography (SiO<sub>2</sub>, 12 g, 3 – 10% Et<sub>2</sub>O in pentane) to afford **7b** as an off-white solid (62 mg, 0.11 mmol, 57%).

Melting Point: 125 – 126 °C.

TLC: R<sub>f</sub> = 0.17 (SiO<sub>2</sub>, 10% Et<sub>2</sub>O in pentane).

<sup>1</sup>H NMR (400 MHz, CDCl<sub>3</sub>) δ 7.42 – 7.35 (m, 2H, ArH), 7.31 – 7.26 (m, 2H, ArH), 7.25 (d, *J* = 7.0 Hz, 3H, ArH), 7.08 – 7.02 (m, 2H, ArH), 6.94 – 6.87 (m, 2H, ArH), 6.79 – 6.72 (m, 2H, ArH), 4.79 (q, *J* = 5.6 Hz, 1H, CHCF<sub>3</sub>), 3.92 – 3.75 (m, 6H, ArOCH<sub>3</sub>, CH<sub>2</sub>, CH<sub>2</sub>), 3.62 (s, 3H, CO<sub>2</sub>CH<sub>3</sub>), 3.48 – 3.40 (m, 1H, CH<sub>2</sub>), 3.22 (s, 1H, CH).

<sup>13</sup>C NMR (101 MHz, CDCl<sub>3</sub>) δ 172.7, 159.1, 138.3, 137.0, 133.8, 130.5, 128.9 (q, *J* = 32.4 Hz), 128.8, 128.8, 128.5, 128.1, 124.45 (q, *J*<sub>C-F</sub> = 3.7 Hz), 124.43 (q, *J*<sub>C-F</sub> = 271.9 Hz), 123.15 (q, *J*<sub>C-F</sub> = 283.8 Hz), 122.1, 113.4, 93.6 (q, *J*<sub>C-F</sub> = 34.5 Hz), 73.6, 60.6, 57.5, 55.2, 53.2, 39.6, 38.9.

<sup>19</sup>F NMR (376 MHz, CDCl<sub>3</sub>) δ -62.4, -79.4 (d, *J* = 5.6 Hz).

HRMS (APCI/QTOF) *m/z*: [M + H]<sup>+</sup> Calcd for C<sub>29</sub>H<sub>26</sub>F<sub>6</sub>NO<sub>4</sub><sup>+</sup> 566.1761; Found 566.1764.

IR (ν<sub>max</sub>, cm<sup>-1</sup>) 3065 (w), 3031 (w), 2956 (w), 2901 (w), 2848 (w), 1721 (m), 1498 (w), 1457 (w), 1311 (s), 1297 (s), 1236 (s), 1159 (s), 1120 (s), 770 (s).

**Methyl 6-benzyl-1-(4-(methoxycarbonyl)phenyl)-5-(trifluoromethyl)-2-(4-(trifluoromethyl)phenyl)-4-oxa-6-azaspiro[2.4]heptane-1-carboxylate (7c)**

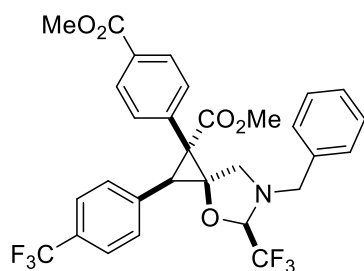

Following general procedure C, starting from **3d** (72, 0.20 mmol, 1.0 equiv.), the crude product was purified by flash column chromatography (SiO<sub>2</sub>, 12 g, 5 – 15% Et<sub>2</sub>O in pentane) to afford **7c** as an off-white amorphous foam (102 mg, 0.17 mmol, 84%).

TLC: R<sub>f</sub> = 0.37 (SiO<sub>2</sub>, 10% Et<sub>2</sub>O in pentane).

<sup>1</sup>H NMR (400 MHz, CDCl<sub>3</sub>) δ 7.93 – 7.85 (m, 2H, ArH), 7.42 – 7.36 (m, 2H, ArH), 7.31 – 7.26 (m, 2H, ArH), 7.26 – 7.21 (m, 3H, ArH), 7.10 – 7.05 (m, 2H, ArH), 7.04 – 6.99 (m, 2H, ArH), 4.82 (q, *J* = 5.6 Hz, 1H, CHCF<sub>3</sub>), 3.89 (d, *J* = 8.4 Hz, 4H, CH<sub>2</sub>, CH<sub>3</sub>), 3.85 – 3.77 (m, 2H, CH<sub>2</sub>), 3.62 (s, 3H, CO<sub>2</sub>CH<sub>3</sub>), 3.53 – 3.45 (m, 1H, CH<sub>2</sub>), 3.27 (s, 1H, CH).

<sup>13</sup>C NMR (101 MHz, CDCl<sub>3</sub>) δ 171.7, 167.0, 137.7 (q, *J*<sub>C-F</sub> = 1.1 Hz), 136.8, 135.5, 132.8, 130.4, 129.6, 129.1, 129.0 (q, *J* = 32.4 Hz), 128.8, 128.8, 128.1, 124.6 (q, *J*<sub>C-F</sub> = 3.8 Hz), 124.3 (q, *J*<sub>C-F</sub> = 272.0 Hz), 123.1 (q, *J*<sub>C-F</sub> = 283.6 Hz), 93.7 (q, *J*<sub>C-F</sub> = 34.3 Hz), 73.5, 60.6, 57.5, 53.3, 52.2, 39.6, 39.3.

<sup>19</sup>F NMR (376 MHz, CDCl<sub>3</sub>) δ -62.5, -79.4 (d, *J* = 5.7 Hz).

HRMS (ESI/QTOF) *m/z*: [M + H]<sup>+</sup> Calcd for C<sub>30</sub>H<sub>26</sub>F<sub>6</sub>NO<sub>5</sub><sup>+</sup> 594.1710; Found 594.1717.

IR (ν<sub>max</sub>, cm<sup>-1</sup>) 3033 (w), 2952 (w), 2845 (w), 1718 (m), 1615 (w), 1437 (w), 1326 (m), 1282 (m), 1218 (m), 1170 (m), 1119 (s), 990 (m), 849 (w), 752 (s).

**Methyl 6-benzyl-2-(4-(methoxycarbonyl)phenyl)-1-(p-tolyl)-5-(trifluoromethyl)-4-oxa-6-azaspiro[2.4]heptane-1-carboxylate (7d)**

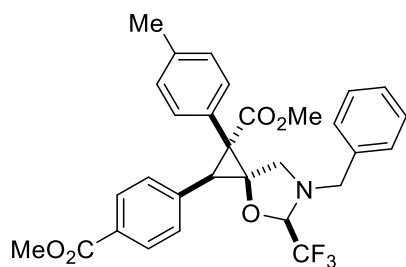

Following general procedure C, starting from **3e** (61 mg, 0.20 mmol, 1.0 equiv.), the crude product was purified by flash column chromatography (SiO<sub>2</sub>, 12 g, 5 – 15% Et<sub>2</sub>O in pentane) to afford **7d** as an off-white solid (70 mg, 0.13 mmol, 65%).

Melting Point: 154 – 156 °C.

TLC: R<sub>f</sub> = 0.29 (SiO<sub>2</sub>, 10% Et<sub>2</sub>O in pentane).

<sup>1</sup>H NMR (400 MHz, CDCl<sub>3</sub>) δ 7.85 – 7.76 (m, 2H, ArH), 7.31 – 7.26 (m, 2H, ArH), 7.26 – 7.20 (m, 3H, ArH), 7.07 – 6.96 (m, 4H, ArH), 6.92 – 6.83 (m, 2H, ArH), 4.78 (q, *J* = 5.6 Hz, 1H,

$\text{CHCF}_3$ ), 3.92 – 3.86 (m, 4H,  $\text{CH}_2$ ,  $\text{CO}_2\text{CH}_3$ ), 3.84 – 3.75 (m, 2H,  $\text{CH}_2$ ), 3.62 (s, 3H,  $\text{CO}_2\text{CH}_3$ ), 3.49 – 3.40 (m, 1H,  $\text{CH}_2$ ), 3.23 (s, 1H, CH), 2.31 (s, 3H,  $\text{ArCH}_3$ ).

$^{13}\text{C}$  NMR (101 MHz,  $\text{CDCl}_3$ )  $\delta$  172.5, 167.2, 139.6, 137.4, 136.9, 132.4, 130.1, 128.7, 128.7, 128.6, 128.5, 128.1, 127.9, 127.0, 123.0 (q,  $J_{\text{C-F}} = 283.8$  Hz), 93.4 (q,  $J_{\text{C-F}} = 34.2$  Hz), 73.6, 60.4, 57.4, 53.1, 52.0, 39.7, 39.3, 21.3.

$^{19}\text{F}$  NMR (376 MHz,  $\text{CDCl}_3$ )  $\delta$  -79.4 (d,  $J = 5.6$  Hz).

HRMS (ESI/QTOF)  $m/z$ :  $[\text{M} + \text{H}]^+$  Calcd for  $\text{C}_{30}\text{H}_{29}\text{F}_3\text{NO}_5^+$  540.1992; Found 540.2002.

IR ( $\nu_{\text{max}}$ ,  $\text{cm}^{-1}$ ) 3060 (w), 3030 (w), 2953 (w), 2846 (w), 1717 (s), 1611 (w), 1436 (m), 1281 (s), 1233 (s), 1175 (s), 1147 (s), 1119 (s), 1018 (m), 992 (m), 756 (s).

**Methyl 6-benzyl-1-(2-fluorophenyl)-2-(4-(methoxycarbonyl)phenyl)-5-(trifluoromethyl)-4-oxa-6-azaspiro[2.4]heptane-1-carboxylate (7e)**

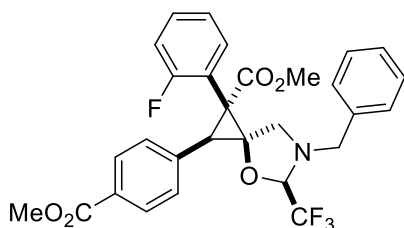

Following general procedure C, starting from **3f** (62 mg, 0.20 mmol, 1.0 equiv.), the crude product was purified by flash column chromatography ( $\text{SiO}_2$ , 12 g, 5 – 15%  $\text{Et}_2\text{O}$  in pentane) to afford **7e** as an off-white solid (70 mg, 0.13 mmol, 64%).

Melting Point: 139 – 139  $^\circ\text{C}$ .

TLC:  $R_f = 0.32$  ( $\text{SiO}_2$ , 10%  $\text{Et}_2\text{O}$  in pentane).

$^1\text{H}$  NMR (400 MHz,  $\text{CDCl}_3$ )  $\delta$  7.81 – 7.72 (m, 2H,  $\text{ArH}$ ), 7.35 – 7.27 (m, 1H,  $\text{ArH}$ ), 7.26 – 7.18 (m, 6H,  $\text{ArH}$ ), 7.10 – 6.98 (m, 3H,  $\text{ArH}$ ), 6.86 – 6.74 (m, 1H,  $\text{ArH}$ ), 4.79 (q,  $J = 5.6$  Hz, 1H,  $\text{CHCF}_3$ ), 3.90 (d,  $J = 13.2$  Hz, 1H,  $\text{CH}_2$ ), 3.86 (s, 3H,  $\text{CO}_2\text{CH}_3$ ), 3.82 – 3.73 (m, 2H,  $\text{CH}_2$ ,  $\text{CH}_2$ ), 3.62 (s, 3H,  $\text{CO}_2\text{CH}_3$ ), 3.54 – 3.46 (m, 1H,  $\text{CH}_2$ ), 3.29 (s, 1H, CH).

$^{13}\text{C}$  NMR (101 MHz,  $\text{CDCl}_3$ )  $\delta$  171.6, 167.2, 162.4 (d,  $J_{\text{C-F}} = 249.2$  Hz), 139.4, 137.0, 133.4 (d,  $J_{\text{C-F}} = 3.3$  Hz), 130.1 (d,  $J_{\text{C-F}} = 8.6$  Hz), 129.6, 128.8, 128.8, 128.5, 128.1, 123.6 (d,  $J_{\text{C-F}} = 3.5$  Hz), 123.1 (q,  $J_{\text{C-F}} = 283.6$  Hz), 118.9 (d,  $J_{\text{C-F}} = 14.7$  Hz), 115.2 (d,  $J_{\text{C-F}} = 21.5$  Hz), 93.7 (q,  $J_{\text{C-F}} = 34.3$  Hz), 73.7, 60.6, 57.5, 53.3, 52.2, 40.3, 35.4. One carbon is not resolved.

$^{19}\text{F}$  NMR (376 MHz,  $\text{CDCl}_3$ )  $\delta$  -79.4 – -79.5 (m), -112.0 – -112.2 (m).

HRMS (ESI/QTOF)  $m/z$ :  $[\text{M} + \text{H}]^+$  Calcd for  $\text{C}_{29}\text{H}_{26}\text{F}_4\text{NO}_5^+$  544.1742; Found 544.1745.

IR ( $\nu_{\text{max}}$ ,  $\text{cm}^{-1}$ ) 3064 (w), 2984 (s), 2969 (s), 2903 (s), 1720 (s), 1612 (w), 1496 (m), 1437 (m), 1282 (s), 1254 (s), 1234 (s), 1061 (s).

**Methyl 6-benzyl-2-(4-(methoxycarbonyl)phenyl)-1-(3-methoxyphenyl)-5-(trifluoromethyl)-4-oxa-6-azaspiro[2.4]heptane-1-carboxylate (7f)**



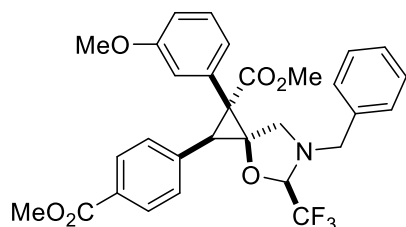

Following general procedure C, starting from **3g** (65 mg, 0.20 mmol, 1.0 equiv.), the crude product was purified by flash column chromatography (SiO<sub>2</sub>, 12 g, 10 – 25% Et<sub>2</sub>O in pentane) to afford **7f** as a colourless amorphous foam (65 mg, 0.12 mmol, 59%).

TLC: R<sub>f</sub> = 0.34 (SiO<sub>2</sub>, 20% Et<sub>2</sub>O in pentane).

<sup>1</sup>H NMR (400 MHz, CDCl<sub>3</sub>) δ 7.85 – 7.76 (m, 2H, ArH), 7.31 – 7.26 (m, 2H, ArH), 7.26 – 7.21 (m, 3H, ArH), 7.11 – 7.01 (m, 3H, ArH), 6.80 (ddd, *J* = 8.3, 2.6, 1.0 Hz, 1H, ArH), 6.65 (dd, *J* = 2.6, 1.5 Hz, 1H, ArH), 6.50 (ddd, *J* = 7.5, 1.5, 1.0 Hz, 1H, ArH), 4.81 (q, *J* = 5.6 Hz, 1H, CHCF<sub>3</sub>), 3.89 (s, 4H, CO<sub>2</sub>CH<sub>3</sub>, CH<sub>2</sub>), 3.83 – 3.76 (m, 2H, CH<sub>2</sub>, CH<sub>2</sub>), 3.66 (s, 3H, ArOCH<sub>3</sub>), 3.63 (s, 3H, CO<sub>2</sub>CH<sub>3</sub>), 3.49 – 3.42 (m, 1H, CH<sub>2</sub>), 3.24 (s, 1H, CH).

<sup>13</sup>C NMR (101 MHz, CDCl<sub>3</sub>) δ 172.3, 167.2, 159.1, 139.6, 137.0, 131.6, 130.2, 128.8, 128.8, 128.8, 128.7, 128.3, 128.1, 125.2, 123.2 (q, *J*<sub>C-F</sub> = 283.2 Hz), 117.4, 114.4, 93.6 (q, *J*<sub>C-F</sub> = 34.2 Hz), 73.7, 60.6, 57.6, 55.1, 53.2, 52.2, 39.8, 39.7.

<sup>19</sup>F NMR (376 MHz, CDCl<sub>3</sub>) δ -79.3 (d, *J* = 5.6 Hz).

HRMS (ESI/QTOF) *m/z*: [M + Na]<sup>+</sup> Calcd for C<sub>30</sub>H<sub>28</sub>F<sub>3</sub>NNaO<sub>6</sub><sup>+</sup> 578.1761; Found 578.1764.

IR (ν<sub>max</sub>, cm<sup>-1</sup>) 3031 (w), 2953 (w), 2842 (w), 1720 (s), 1608 (m), 1435 (m), 1284 (s), 1249 (s), 1178 (s), 993 (m), 864 (m).

**Methyl 6-benzyl-1-(2-chloro-4-fluorophenyl)-2-(4-(methoxycarbonyl)phenyl)-5-(trifluoromethyl)-4-oxa-6-azaspiro[2.4]heptane-1-carboxylate (7g)**

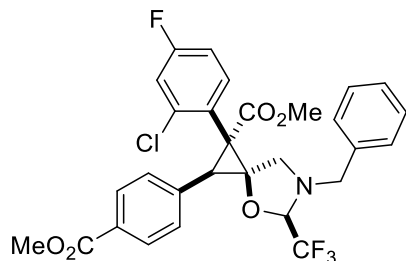

Following general procedure C, starting from **3h** (69 mg, 0.20 mmol, 1.0 equiv.), the crude product was purified by flash column chromatography (SiO<sub>2</sub>, 12 g, 5 – 15% Et<sub>2</sub>O in pentane), afford **7g** as an off-white amorphous foam (88 mg, 0.15 mmol, 76%).

TLC: R<sub>f</sub> = 0.23 (SiO<sub>2</sub>, 10% Et<sub>2</sub>O in pentane).

<sup>1</sup>H NMR (400 MHz, CDCl<sub>3</sub>) δ 7.78 (d, *J* = 8.1 Hz, 2H, ArH), 7.64 (s, 1H, ArH), 7.31 – 7.18 (m, 5H, ArH), 7.13 – 6.82 (m, 4H, ArH), 4.92 – 4.71 (m, 1H, CHCF<sub>3</sub>), 3.93 – 3.85 (m, 4H, CH<sub>2</sub>, CO<sub>2</sub>CH<sub>3</sub>), 3.79 (d, *J* = 13.2 Hz, 1H, CH<sub>2</sub>), 3.73 (d, *J* = 13.3 Hz, 1H, CH<sub>2</sub>), 3.64 (s, 3H, CO<sub>2</sub>CH<sub>3</sub>), 3.49 (d, *J* = 13.3 Hz, 1H, CH<sub>2</sub>), 3.41 (s, 1H, CH).

<sup>13</sup>C NMR (101 MHz, CDCl<sub>3</sub>) δ 171.1, 167.1, 162.1 (d, *J*<sub>C-F</sub> = 251.0 Hz), 138.7, 138.0 (d, *J*<sub>C-F</sub> = 10.3 Hz), 136.7, 134.4 (d, *J*<sub>C-F</sub> = 8.8 Hz), 129.4, 128.7, 128.7, 128.4, 128.0, 125.9, 123.0 (q, *J*<sub>C-F</sub> = 283.6 Hz), 116.9 (d, *J*<sub>C-F</sub> = 24.7 Hz), 113.7 (d, *J*<sub>C-F</sub> = 20.7 Hz), 93.7 (q, *J*<sub>C-F</sub> = 34.3 Hz), 73.7, 60.4, 57.4, 53.2, 52.0, 40.8, 37.8. One carbon is not resolved.

<sup>19</sup>F NMR (376 MHz, CDCl<sub>3</sub>) δ -79.3, -111.2.

HRMS (ESI/QTOF)  $m/z$ :  $[M + H]^+$  Calcd for  $C_{29}H_{25}ClF_4NO_5^+$  578.1352; Found 578.1359.

IR ( $\nu_{\max}$ ,  $cm^{-1}$ ) 3070 (w), 3031 (w), 2953 (w), 2846 (w), 1720 (s), 1607 (m), 1495 (m), 1437 (m), 1282 (s), 1234 (s), 1179 (s), 1120 (s), 988 (m).

**Benzyl 6-benzyl-2-(4-(methoxycarbonyl)phenyl)-1-phenyl-5-(trifluoromethyl)-4-oxa-6-azaspiro[2.4]heptane-1-carboxylate (7h)**

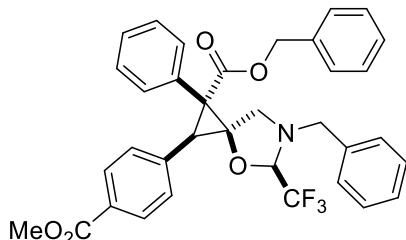

Following general procedure C, starting from **3i** (74 mg, 0.20 mmol, 1.0 equiv.), the crude product was purified by flash column chromatography ( $SiO_2$ , 12 g, 10 – 25%  $Et_2O$  in pentane) to afford **7h** as a colourless amorphous foam (82 mg, 0.14 mmol, 68%).

TLC:  $R_f$  = 0.12 ( $SiO_2$ , 10%  $Et_2O$  in pentane).

$^1H$  NMR (400 MHz,  $CDCl_3$ )  $\delta$  7.84 – 7.74 (m, 2H, ArH), 7.31 – 7.26 (m, 2H, ArH), 7.26 – 7.18 (m, 9H, ArH), 7.09 – 6.97 (m, 6H, ArH), 5.12 – 5.01 (m, 2H, ArCH<sub>2</sub>), 4.79 (q,  $J$  = 5.6 Hz, 1H, CHCF<sub>3</sub>), 3.91 – 3.84 (m, 4H, CO<sub>2</sub>CH<sub>3</sub>, CH<sub>2</sub>), 3.78 (d,  $J$  = 13.2 Hz, 1H, CH<sub>2</sub>), 3.75 – 3.67 (m, 1H, CH<sub>2</sub>), 3.43 – 3.33 (m, 1H, CH<sub>2</sub>), 3.25 (s, 1H, CH).

$^{13}C$  NMR (101 MHz,  $CDCl_3$ )  $\delta$  171.6, 167.2, 139.5, 137.0, 135.8, 132.7, 130.3, 130.2, 128.8, 128.8, 128.8, 128.6, 128.3, 128.1, 128.0, 127.9, 127.8, 127.1, 123.1 (q,  $J_{C-F}$  = 283.6 Hz), 93.6 (q,  $J_{C-F}$  = 34.3 Hz), 73.7, 67.3, 60.5, 57.5, 52.2, 39.9, 39.6.

$^{19}F$  NMR (376 MHz,  $CDCl_3$ )  $\delta$  -79.3 (d,  $J$  = 5.8 Hz).

HRMS (ESI/QTOF)  $m/z$ :  $[M + H]^+$  Calcd for  $C_{35}H_{31}F_3NO_5^+$  602.2149; Found 602.2149.

IR ( $\nu_{\max}$ ,  $cm^{-1}$ ) 3063 (w), 3030 (m), 2954 (m), 2902 (m), 2847 (w), 1718 (s), 1610 (m), 1438 (m), 1281 (s), 1219 (s), 1176 (s), 1119 (s), 992 (s), 862 (m), 769 (s).

**Methyl 4-(-6-benzyl-2-phenyl-2,5-bis(trifluoromethyl)-4-oxa-6-azaspiro[2.4]heptan-1-yl)benzoate (7i)**

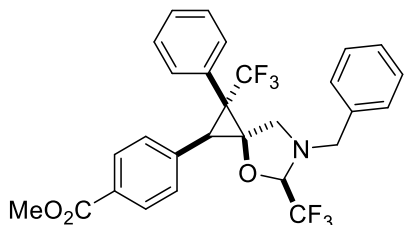

Following general procedure C, starting from **3j** (61 mg, 0.20 mmol, 1.0 equiv.), the crude product was purified by flash column chromatography ( $SiO_2$ , 12 g, 5 – 15%  $Et_2O$  in pentane) to afford **7i** as a colourless amorphous foam (73 mg, 0.14 mmol, 68%).

TLC:  $R_f$  = 0.27 ( $SiO_2$ , 5% EtOAc in pentane).

$^1H$  NMR (400 MHz,  $CDCl_3$ )  $\delta$  7.86 – 7.80 (m, 2H, ArH), 7.35 – 7.26 (m, 4H, ArH), 7.26 – 7.19 (m, 4H, ArH), 7.10 – 7.04 (m, 2H, ArH), 7.04 – 6.98 (m, 2H, ArH), 4.74 (q,  $J$  = 5.5 Hz, 1H,

$\text{CHCF}_3$ ), 4.04 (d,  $J = 13.2$  Hz, 1H,  $\text{CH}_2$ ), 3.92 – 3.84 (m, 4H,  $\text{CO}_2\text{CH}_3$ ,  $\text{CH}_2$ ), 3.78 (d,  $J = 13.2$  Hz, 1H,  $\text{CH}_2$ ), 3.30 (d,  $J = 12.9$  Hz, 1H,  $\text{CH}_2$ ), 2.84 (s, 1H, CH).

$^{13}\text{C}$  NMR (101 MHz,  $\text{CDCl}_3$ )  $\delta$  167.1, 138.4, 136.8, 133.7, 130.2, 128.9, 128.9, 128.8, 128.8, 128.7, 128.2, 127.9, 126.8, 125.1 (d,  $J_{\text{C-F}} = 275.9$  Hz), 123.0 (d,  $J_{\text{C-F}} = 283.4$  Hz), 93.0 (q,  $J_{\text{C-F}} = 34.5$  Hz), 70.1, 60.5, 56.9, 52.2, 37.1 (q,  $J_{\text{C-F}} = 32.5$  Hz), 34.8 (q,  $J_{\text{C-F}} = 2.5$  Hz).

$^{19}\text{F}$  NMR (376 MHz,  $\text{CDCl}_3$ )  $\delta$  -66.8, -79.5 (d,  $J = 5.5$  Hz).

HRMS (ESI/QTOF)  $m/z$ :  $[\text{M} + \text{H}]^+$  Calcd for  $\text{C}_{28}\text{H}_{24}\text{F}_6\text{NO}_3^+$  536.1655; Found 536.1660.

IR ( $\nu_{\text{max}}$ ,  $\text{cm}^{-1}$ ) 3065 (w), 2959 (m), 2899 (w), 1721 (s), 1612 (w), 1280 (s), 1139 (s), 1049 (m), 861 (w), 765 (s).

### 6-Benzyl-2-(4-chlorophenyl)-1-phenyl-1,5-bis(trifluoromethyl)-4-oxa-6-azaspiro[2.4]heptane (7j)

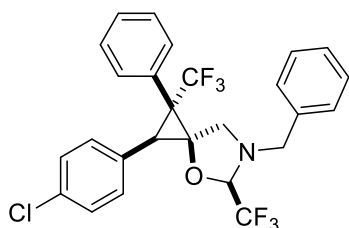

Following general procedure C, starting from **3j** (150 mg, 0.495 mmol, 1.00 equiv.), the crude product was purified by flash column chromatography ( $\text{SiO}_2$ , 12 g, 3 – 12% EtOAc in pentane) to afford **7j** as a colourless amorphous foam (165 mg, 0.322 mmol, 65%).

TLC:  $R_f = 0.65$  ( $\text{SiO}_2$ , 5% EtOAc in pentane).

$^1\text{H}$  NMR (400 MHz,  $\text{CDCl}_3$ )  $\delta$  7.36 – 7.20 (m, 8H, ArH), 7.15 – 7.11 (m, 2H, ArH), 7.10 – 7.01 (m, 2H, ArH), 6.90 – 6.83 (m, 2H, ArH), 4.72 (q,  $J = 5.6$  Hz, 1H,  $\text{CHCF}_3$ ), 4.01 (d,  $J = 13.2$  Hz, 1H,  $\text{CH}_2$ ), 3.87 (d,  $J = 13.2$  Hz, 1H,  $\text{CH}_2$ ), 3.78 (d,  $J = 13.2$  Hz, 1H,  $\text{CH}_2$ ), 3.30 – 3.23 (m, 1H,  $\text{CH}_2$ ), 2.76 (s, 1H, CH).

$^{13}\text{C}$  NMR (101 MHz,  $\text{CDCl}_3$ )  $\delta$  136.9, 133.8, 133.0, 131.5, 131.4, 128.9, 128.8, 128.8, 128.2, 128.0, 127.9, 126.9, 125.2 (q,  $J_{\text{C-F}} = 275.4$  Hz), 123.0 (q,  $J_{\text{C-F}} = 283.4$  Hz), 93.0 (q,  $J_{\text{C-F}} = 34.4$  Hz), 69.7 (q,  $J_{\text{C-F}} = 1.8$  Hz), 60.5, 56.8, 36.5 (q,  $J_{\text{C-F}} = 32.4$  Hz), 34.3 (q,  $J_{\text{C-F}} = 2.8$  Hz).

$^{19}\text{F}$  NMR (376 MHz,  $\text{CDCl}_3$ )  $\delta$  -66.7, -79.5 (d,  $J = 5.5$  Hz).

HRMS (ESI/QTOF)  $m/z$ :  $[\text{M} + \text{H}]^+$  Calcd for  $\text{C}_{26}\text{H}_{21}\text{ClF}_6\text{NO}^+$  512.1210; Found 512.1221.

IR ( $\nu_{\text{max}}$ ,  $\text{cm}^{-1}$ ) 3064 (w), 3031 (w), 2842 (w), 1496 (m), 1294 (m), 1217 (s), 1179 (s), 1141 (s), 1004 (m), 934 (m).

### Methyl 6-(4-methoxybenzyl)-2-(4-(methoxycarbonyl)phenyl)-1-phenyl-5-(trifluoromethyl)-4-oxa-6-azaspiro[2.4]heptane-1-carboxylate (7k)

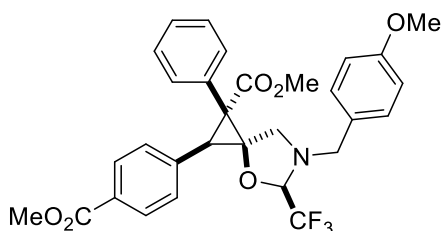

Following general procedure C, starting from **3k** (65 mg, 0.20 mmol, 1.0 equiv.), the crude product was purified by flash column chromatography (SiO<sub>2</sub>, 12 g, 5 – 20% Et<sub>2</sub>O in pentane), to afford **7k** as an off-white solid (64 mg, 0.12 mmol, 58%).

Melting Point: 137 – 139 °C.

TLC: R<sub>f</sub> = 0.32 (SiO<sub>2</sub>, 20% Et<sub>2</sub>O in pentane).

<sup>1</sup>H NMR (400 MHz, CDCl<sub>3</sub>) δ 7.82 – 7.75 (m, 2H, ArH), 7.25 – 7.16 (m, 3H, ArH), 7.16 – 7.10 (m, 2H, ArH), 7.02 – 6.95 (m, 4H, ArH), 6.80 – 6.75 (m, 2H, ArH), 4.79 (q, *J* = 5.7 Hz, 1H, CHCF<sub>3</sub>), 3.88 (s, 3H, CO<sub>2</sub>CH<sub>3</sub>), 3.84 (d, *J* = 13.0 Hz, 1H, CH<sub>2</sub>), 3.81 – 3.76 (m, 1H, CH<sub>2</sub>), 3.75 (s, 3H, ArOCH<sub>3</sub>), 3.73 (d, *J* = 13.0 Hz, 1H, CH<sub>2</sub>), 3.62 (s, 3H, CO<sub>2</sub>CH<sub>3</sub>), 3.50 – 3.44 (m, 1H, CH<sub>2</sub>), 3.22 (s, 1H, CH).

<sup>13</sup>C NMR (101 MHz, CDCl<sub>3</sub>) δ 172.4, 167.3, 159.4, 139.6, 132.7, 130.3, 130.2, 130.2, 128.9, 128.8, 128.3, 127.8, 127.8, 123.2 (d, *J*<sub>C-F</sub> = 283.6 Hz), 114.1, 93.3 (q, *J*<sub>C-F</sub> = 34.2 Hz), 73.7, 59.9, 57.4, 55.3, 53.2, 52.2, 39.9, 39.8.

<sup>19</sup>F NMR (376 MHz, CDCl<sub>3</sub>) δ -79.4 (d, *J* = 5.6 Hz).

HRMS (ESI/QTOF) *m/z*: [M + Na]<sup>+</sup> Calcd for C<sub>30</sub>H<sub>28</sub>F<sub>3</sub>NNaO<sub>6</sub><sup>+</sup> 578.1761; Found 578.1771.

IR (ν<sub>max</sub>, cm<sup>-1</sup>) 3031 (w), 2952 (w), 2839 (w), 1718 (s), 1611 (m), 1513 (m), 1437 (m), 1283 (s), 1253 (s), 1175 (s), 1147 (s), 1121 (s), 992 (m), 862 (m).

**Methyl 2-(4-(methoxycarbonyl)phenyl)-6-methyl-1-phenyl-5-(trifluoromethyl)-4-oxa-6-azaspiro[2.4]heptane-1-carboxylate (7l)**

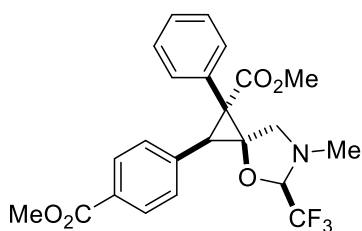

Following general procedure C, starting from **3l** (43 mg, 0.20 mmol, 1.0 equiv.), the crude product was purified by flash column chromatography (SiO<sub>2</sub>, 12 g, 15 – 45% Et<sub>2</sub>O in pentane), to afford **7l** as an off-white solid (59 mg, 0.13 mmol, 66%).

Melting Point: 101 – 102 °C.

TLC: R<sub>f</sub> = 0.31 (SiO<sub>2</sub>, 30% Et<sub>2</sub>O in pentane).

<sup>1</sup>H NMR (400 MHz, CDCl<sub>3</sub>) δ 7.82 – 7.69 (m, 2H, ArH), 7.30 – 7.16 (m, 3H, ArH), 7.03 – 6.94 (m, 4H, ArH), 4.59 (q, *J* = 5.5 Hz, 1H, CHCF<sub>3</sub>), 3.87 (s, 3H, CO<sub>2</sub>CH<sub>3</sub>), 3.82 (d, *J* = 1.4 Hz, 1H, CH<sub>2</sub>), 3.64 (s, 3H, CO<sub>2</sub>CH<sub>3</sub>), 3.37 – 3.30 (m, 1H, CH<sub>2</sub>), 3.29 (s, 1H, CH), 2.57 (s, 3H, NCH<sub>3</sub>).

<sup>13</sup>C NMR (101 MHz, CDCl<sub>3</sub>) δ 172.4, 167.2, 139.4, 132.8, 130.2, 128.8, 128.4, 127.9, 127.8, 123.0 (q, *J*<sub>C-F</sub> = 283.7 Hz), 95.4 (q, *J*<sub>C-F</sub> = 34.1 Hz), 73.4, 59.7, 53.3, 52.2, 44.4, 39.8, 39.5. One carbon is not resolved.

<sup>19</sup>F NMR (376 MHz, CDCl<sub>3</sub>) δ -79.9 (d, *J* = 5.6 Hz).

HRMS (ESI/QTOF) *m/z*: [M + Na]<sup>+</sup> Calcd for C<sub>23</sub>H<sub>22</sub>F<sub>3</sub>NNaO<sub>5</sub><sup>+</sup> 472.1342; Found 472.1347.

IR (ν<sub>max</sub>, cm<sup>-1</sup>) 3059 (w), 2987 (m), 2968 (m), 2902 (m), 1717 (s), 1610 (w), 1436 (m), 1281 (s), 1254 (s), 1228 (s), 1148 (s), 1069 (s), 860 (m), 770 (s).

**Ethyl 6-benzyl-2-(4-(methoxycarbonyl)phenyl)-1-methyl-5-(trifluoromethyl)-4-oxa-6-azaspiro[2.4]heptane-1-carboxylate (7m)**

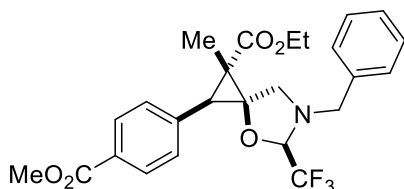

Following general procedure C, starting from **3m** (46 mg, 0.20 mmol, 1.0 equiv.), the crude product was purified by flash column chromatography (SiO<sub>2</sub>, 12 g, 5 – 15% Et<sub>2</sub>O in pentane) to afford **7m** as beige solid (62 mg, 0.12 mmol, 58%).

Melting Point: 100 – 102 °C.

TLC: R<sub>f</sub> = 0.27 (SiO<sub>2</sub>, 5% EtOAc in pentane).

<sup>1</sup>H NMR (400 MHz, CDCl<sub>3</sub>) δ 8.02 – 7.95 (m, 2H, ArH), 7.40 – 7.28 (m, 7H, ArH), 4.94 (q, *J* = 5.6 Hz, 1H, CHCF<sub>3</sub>), 4.18 (dddd, *J* = 17.9, 10.7, 7.1, 3.6 Hz, 2H, CH<sub>2</sub>CH<sub>3</sub>), 4.10 (d, *J* = 13.2 Hz, 1H, CH<sub>2</sub>), 4.03 (d, *J* = 13.2 Hz, 1H, CH<sub>2</sub>), 3.92 (s, 3H, CO<sub>2</sub>CH<sub>3</sub>), 3.60 – 3.51 (m, 1H, CH<sub>2</sub>), 3.34 – 3.24 (m, 1H, CH<sub>2</sub>), 2.97 (s, 1H, CH), 1.27 (t, *J* = 7.1 Hz, 3H, CH<sub>2</sub>CH<sub>3</sub>), 1.16 (s, 3H, C-CH<sub>3</sub>).

<sup>13</sup>C NMR (101 MHz, CDCl<sub>3</sub>) δ 172.8, 167.1, 139.5, 137.3, 130.4, 129.5, 128.8, 128.8, 128.8, 128.0, 123.2 (q, *J*<sub>C-F</sub> = 285.0 Hz), 92.6 (q, *J*<sub>C-F</sub> = 34.1 Hz), 73.8, 61.4, 60.7, 56.4, 52.2, 34.2, 32.3, 14.4, 9.9.

<sup>19</sup>F NMR (376 MHz, CDCl<sub>3</sub>) δ -79.8 (d, *J* = 5.7 Hz).

HRMS (ESI/QTOF) *m/z*: [M + Na]<sup>+</sup> Calcd for C<sub>25</sub>H<sub>26</sub>F<sub>3</sub>NNaO<sub>5</sub><sup>+</sup> 500.1655; Found 500.1663.

IR (ν<sub>max</sub>, cm<sup>-1</sup>) 3075 (w), 2985 (w), 2902 (w), 2841 (w), 1717 (s), 1611 (w), 1440 (m), 1279 (s), 1175 (s), 1115 (s), 1022 (m), 867 (m).

**Methyl 4-(-6-benzyl-2-(((*tert*-butyldimethylsilyl)oxy)methyl)-2-phenyl-5-(trifluoromethyl)-4-oxa-6-azaspiro[2.4]heptan-1-yl)benzoate (7n)**

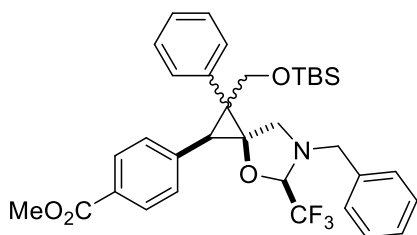

Following general procedure C, starting from **3o** (76 mg, 0.20 mmol, 1.0 equiv.), the crude product was purified by flash column chromatography (SiO<sub>2</sub>, 12 g, 2 – 10% EtOAc in pentane) to afford **7n** as a colorless amorphous solid and as an inseparable mixture of diastereomers (70 mg, 0.13 mmol, 63%, 5:3 d.r.). The d.r. was determined by comparison of the integrals of silyl group Si(CH<sub>3</sub>)<sub>2</sub> signal.

TLC: R<sub>f</sub> = 0.70 (SiO<sub>2</sub>, 10% EtOAc in pentane).

<sup>1</sup>H NMR (400 MHz, CDCl<sub>3</sub>) δ 8.06 – 8.01 (m, 2H minor, ArH), 7.83 – 7.78 (m, 2H major, ArH), 7.74 – 7.66 (m, 2H minor, ArH), 7.40 – 7.27 (m, 4H major, 10H minor, ArH), 7.25 – 7.20 (m, 4H major, ArH), 7.08 – 7.02 (m, 2H major, ArH), 7.00 – 6.94 (m, 2H major, ArH), 4.95 (q, *J* = 5.1 Hz, 1H minor, CHCF<sub>3</sub>), 4.63 (q, *J* = 5.5 Hz, 1H major, CHCF<sub>3</sub>), 4.20 (d, *J* = 13.2 Hz, 1H minor, CH<sub>2</sub>), 3.95 (s, 3H minor, CO<sub>2</sub>CH<sub>3</sub>), 3.92 (d, *J* = 8.3 Hz, 1H major, CH<sub>2</sub>), 3.91 – 3.88 (m, 3H major, 2H minor CO<sub>2</sub>CH<sub>3</sub>, CH<sub>2</sub>), 3.88 – 3.85 (m, 1H major, CH<sub>2</sub>), 3.81 (d, *J* = 3.4 Hz, 2H major OCH<sub>2</sub>),

3.71 (d,  $J = 10.9$  Hz, 1H minor,  $\text{CH}_2$ ), 3.64 (d,  $J = 10.5$  Hz, 1H major,  $\text{CH}_2$ ), 3.30 (d,  $J = 11.3$  Hz, 1H minor,  $\text{CH}_2$ ), 3.24 (d,  $J = 13.1$  Hz, 1H major,  $\text{CH}_2$ ), 2.69 (d,  $J = 11.3$  Hz, 1H minor,  $\text{CH}_2$ ), 2.58 (s, 1H minor,  $\text{CH}$ ), 2.54 (s, 1H major,  $\text{CH}$ ), 0.82 (s, 9H major,  $\text{SiC}(\text{CH}_3)_3$ ), 0.68 (s, 9H minor,  $\text{SiC}(\text{CH}_3)_3$ ), -0.11 (d,  $J = 38.6$  Hz, 6H major  $\text{Si}(\text{CH}_3)_2$ ), -0.35 (d,  $J = 38.1$  Hz, 6H minor,  $\text{Si}(\text{CH}_3)_2$ ).

$^{13}\text{C}$  NMR (101 MHz,  $\text{CDCl}_3$ )  $\delta$  167.5 (major), 167.3 (minor), 142.0 (major), 140.9 (minor), 140.3 (minor), 137.5 (major), 137.5 (minor), 134.2 (major), 132.2 (major), 130.9 (major), 129.9 (minor), 129.7 (major), 129.3 (minor), 128.9 (major), 128.7 (major), 128.7 (major), 128.7 (minor), 128.5 (minor), 128.5 (minor), 128.3 (minor), 127.9 (major), 127.9 (major), 127.3 (minor), 127.2 (major), 127.0 (minor), 123.5 (q,  $J_{\text{C-F}} = 284.1$  Hz, minor), 123.3 (q,  $J_{\text{C-F}} = 283.4$  Hz, major), 92.5 (q,  $J_{\text{C-F}} = 33.8$  Hz, major), 92.5 (q,  $J_{\text{C-F}} = 33.7$  Hz, minor), 72.2 (minor), 71.6 (major), 68.2 (major), 63.0 (minor), 60.4 (major), 59.9 (minor), 56.1 (minor), 55.9 (major), 52.2 (minor), 52.0 (major), 39.1 (minor), 37.8 (major), 34.4 (major), 33.4 (minor), 25.9 (major), 25.7 (minor), 18.2 (major), 18.1 (minor), -5.7 (2 x  $\text{CH}_3\text{Si}$ , major), -6.0 (2 x  $\text{CH}_3\text{Si}$ , minor). 1C of minor diastereomer not resolved.

$^{19}\text{F}$  NMR (376 MHz,  $\text{CDCl}_3$ )  $\delta$  -79.83 (d,  $J = 5.5$  Hz, major), -80.11 (d,  $J = 5.2$  Hz, minor).

IR ( $\nu_{\text{max}}$ ,  $\text{cm}^{-1}$ ) 3060 (w), 3028 (w), 2954 (m), 2898 (m), 2858 (m), 1722 (s), 1610 (w), 1497 (w), 1467 (w), 1439 (w), 1281 (s), 1174 (s), 1154 (s), 1110 (s), 1023 (m), 840 (s).

HRMS (ESI/QTOF)  $m/z$ :  $[\text{M} + \text{Na}]^+$  Calcd for  $\text{C}_{34}\text{H}_{40}\text{F}_3\text{NNaO}_4\text{Si}^+$  634.2571; Found 634.2570.

**Methyl 6-benzyl-1-phenyl-5-(trifluoromethyl)-2-((triisopropylsilyl)ethynyl)-4-oxa-6-azaspiro[2.4]heptane-1-carboxylate (9a)**

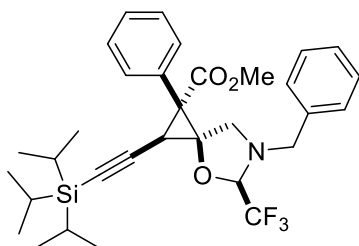

Following a modified version of general procedure C, starting from **3a** (59 mg, 0.20 mmol, 1.0 equiv.) using (bromoethynyl)triisopropylsilane (72  $\mu\text{L}$ , 0.30 mmol, 1.5 equiv.),  $\text{Cs}_2\text{CO}_3$  (85 mg, 0.26 mmol, 1.3 equiv.), BrettPhos Pd G3 (7.7 mg, 8.0  $\mu\text{mol}$ , 4.0 mol%) and BrettPhos (8.6 mg, 16  $\mu\text{mol}$ , 8.0 mol%). The crude product was purified by flash column chromatography ( $\text{SiO}_2$ , 12 g, 3 – 12%  $\text{Et}_2\text{O}$  in pentane) to afford **9a** as a colourless amorphous foam (45 mg, 0.079 mmol, 39%).

TLC:  $R_f = 0.44$  ( $\text{SiO}_2$ , 5%  $\text{Et}_2\text{O}$  in pentane).

$^1\text{H}$  NMR (400 MHz,  $\text{CDCl}_3$ )  $\delta$  7.42 – 7.37 (m, 4H,  $\text{ArH}$ ), 7.37 – 7.23 (m, 6H,  $\text{ArH}$ ), 4.77 (q,  $J = 5.6$  Hz, 1H,  $\text{CHCF}_3$ ), 4.09 (d,  $J = 13.1$  Hz, 1H,  $\text{CH}_2$ ), 4.03 (d,  $J = 13.1$  Hz, 1H,  $\text{CH}_2$ ), 3.77 – 3.70 (m, 1H,  $\text{CH}_2$ ), 3.60 (s, 3H,  $\text{CO}_2\text{CH}_3$ ), 3.39 – 3.31 (m, 1H,  $\text{CH}_2$ ), 2.78 (s, 1H,  $\text{CH}$ ), 1.01 – 0.86 (m, 21H,  $\text{Si}-(\text{CH}-(\text{CH}_3)_2)_3$ ).

$^{13}\text{C}$  NMR (101 MHz,  $\text{CDCl}_3$ )  $\delta$  171.3, 137.2, 132.1, 131.2, 129.0, 128.8, 128.0, 127.7, 127.6, 123.1 (q,  $J_{\text{C-F}} = 283.3$  Hz), 100.4, 92.9 (q,  $J_{\text{C-F}} = 34.2$  Hz), 88.0, 72.5, 60.7, 56.6, 56.6, 53.2, 38.1, 27.7, 18.6, 18.5, 11.2.

$^{19}\text{F}$  NMR (376 MHz,  $\text{CDCl}_3$ )  $\delta$  -79.7 (d,  $J = 5.6$  Hz).

HRMS (ESI/QTOF)  $m/z$ :  $[\text{M} + \text{H}]^+$  Calcd for  $\text{C}_{32}\text{H}_{41}\text{F}_3\text{NO}_3\text{Si}^+$  572.2802; Found 572.2809.

IR ( $\nu_{\max}$ ,  $\text{cm}^{-1}$ ) 3065 (w), 3033 (w), 2944 (m), 2865 (m), 2166 (w), 1722 (s), 1461 (m), 1293 (m), 1254 (s), 1176 (s), 1150 (s).

**Methyl 6-benzyl-1-(4-chlorophenyl)-5-(trifluoromethyl)-2-(3,3,3-trifluoroprop-1-en-2-yl)-4-oxa-6-azaspiro[2.4]heptane-1-carboxylate (11a)**

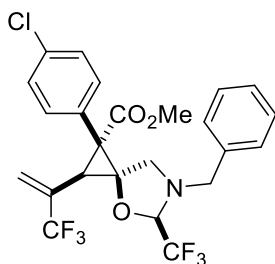

Following general procedure C, starting from **3b** (65 mg, 0.20 mmol, 1.0 equiv.), the crude product was purified by flash column chromatography ( $\text{SiO}_2$ , 12 g, 5 – 15%  $\text{Et}_2\text{O}$  in pentane) to afford **11a** as white solid (44 mg, 0.084 mmol, 42%).

Melting Point: 81 – 82 °C.

TLC:  $R_f$  = 0.61 ( $\text{SiO}_2$ , 10%  $\text{Et}_2\text{O}$  in pentane).

$^1\text{H}$  NMR (400 MHz,  $\text{CDCl}_3$ )  $\delta$  7.40 – 7.33 (m, 4H, ArH), 7.33 – 7.28 (m, 3H, ArH), 7.14 – 7.08 (m, 2H, ArH), 5.68 – 5.61 (m, 1H,  $\text{C}=\text{CH}_2$ ), 4.83 (q,  $J$  = 5.6 Hz, 1H,  $\text{CHCF}_3$ ), 4.68 (q,  $J$  = 1.5 Hz, 1H,  $\text{C}=\text{CH}_2$ ), 3.98 (d,  $J$  = 13.0 Hz, 1H,  $\text{CH}_2$ ), 3.91 (d,  $J$  = 13.0 Hz, 1H,  $\text{CH}_2$ ), 3.75 – 3.68 (m, 1H,  $\text{CH}_2$ ), 3.62 (s, 3H,  $\text{CO}_2\text{CH}_3$ ), 3.43 – 3.35 (m, 1H,  $\text{CH}_2$ ), 2.79 (s, 1H, CH).

$^{13}\text{C}$  NMR (101 MHz,  $\text{CDCl}_3$ )  $\delta$  171.4, 136.8, 134.1, 134.0, 129.7 (q,  $J_{\text{C-F}}$  = 29.7 Hz), 128.9, 128.9, 128.4, 128.2, 128.1, 123.6 (q,  $J_{\text{C-F}}$  = 274.4 Hz), 123.0 (q,  $J_{\text{C-F}}$  = 283.4 Hz), 122.1 (q,  $J_{\text{C-F}}$  = 4.7 Hz), 93.8 (q,  $J_{\text{C-F}}$  = 34.4 Hz), 72.7, 60.6, 57.1, 53.4, 38.0, 31.7.

$^{19}\text{F}$  NMR (376 MHz,  $\text{CDCl}_3$ )  $\delta$  -68.8 (s), -79.4 (d,  $J$  = 5.5 Hz).

HRMS (ESI/QTOF)  $m/z$ :  $[\text{M} + \text{H}]^+$  Calcd for  $\text{C}_{24}\text{H}_{21}\text{ClF}_6\text{NO}_3^+$  520.1109; Found 520.1114.

IR ( $\nu_{\max}$ ,  $\text{cm}^{-1}$ ) 3066 (w), 3033 (w), 2956 (w), 2851 (w), 1725 (m), 1496 (w), 1293 (m), 1238 (m), 1173 (s), 1123 (s), 988 (m), 740 (m).

**Methyl 6-benzyl-1-(4-(methoxycarbonyl)phenyl)-5-(trifluoromethyl)-2-(3,3,3-trifluoroprop-1-en-2-yl)-4-oxa-6-azaspiro[2.4]heptane-1-carboxylate (11b)**

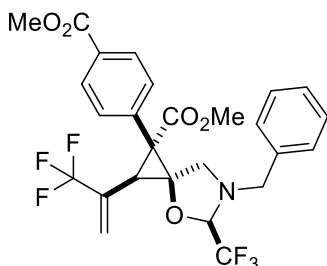

Following general procedure C, starting from **3d** (328 mg, 0.933 mmol, 1.00 equiv.), the crude product was purified by flash column chromatography ( $\text{SiO}_2$ , 12 g, 3 – 15%  $\text{Et}_2\text{O}$  in pentane), afford **11b** as a white solid (164 mg, 0.302 mmol, 32%).

TLC:  $R_f$  = 0.36 ( $\text{SiO}_2$ , 10%  $\text{Et}_2\text{O}$  in pentane).

$^1\text{H}$  NMR (400 MHz,  $\text{CDCl}_3$ )  $\delta$  8.03 – 7.97 (m, 2H, ArH), 7.44 – 7.28 (m, 5H, ArH), 7.28 – 7.21 (m, 2H, ArH), 5.65 – 5.54 (m, 1H,  $\text{C}=\text{CH}_2$ ), 4.82 (q,  $J = 5.6$  Hz, 1H,  $\text{CHCF}_3$ ), 4.65 – 4.55 (m, 1H,  $\text{C}=\text{CH}_2$ ), 3.97 (d,  $J = 13.0$  Hz, 1H,  $\text{CH}_2$ ), 3.93 – 3.86 (m, 4H  $\text{CH}_2$ ,  $\text{ArCO}_2\text{CH}_3$ ), 3.77 – 3.68 (m, 1H  $\text{CH}_2$ ), 3.60 (s, 3H,  $\text{CO}_2\text{CH}_3$ ), 3.45 – 3.36 (m, 1H,  $\text{CH}_2$ ), 2.81 (s, 1H, CH).

$^{13}\text{C}$  NMR (101 MHz,  $\text{CDCl}_3$ )  $\delta$  171.1, 167.0, 136.8, 134.8, 132.7, 129.8, 129.7 (q,  $J_{\text{C-F}} = 29.8$  Hz), 129.3, 128.9, 128.9, 128.2, 123.5 (q,  $J_{\text{C-F}} = 273.5$  Hz), 123.0 (q,  $J_{\text{C-F}} = 283.3$  Hz), 122.1 (q,  $J_{\text{C-F}} = 5.6$  Hz), 93.8 (q,  $J_{\text{C-F}} = 34.5$  Hz), 72.7, 60.6, 57.2, 53.4, 52.3, 38.5, 31.8.

$^{19}\text{F}$  NMR (376 MHz,  $\text{CDCl}_3$ )  $\delta$  -68.8, -79.4 (d,  $J = 5.5$  Hz).

HRMS (ESI/QTOF)  $m/z$ :  $[\text{M} + \text{H}]^+$  Calcd for  $\text{C}_{26}\text{H}_{24}\text{F}_6\text{NO}_5^+$  544.1553; Found 544.1559.

IR ( $\nu_{\text{max}}$ ,  $\text{cm}^{-1}$ ) 3037 (w), 2955 (w), 2852 (w), 1724 (s), 1607 (w), 1438 (m), 1282 (s), 1177 (s), 1124 (s), 992 (m).



# Product Modifications

## Methyl 5-(benzyl(*tert*-butoxycarbonyl)amino)-3-(4-chlorophenyl)-4-oxo-2-phenylpentanoate (**12**)

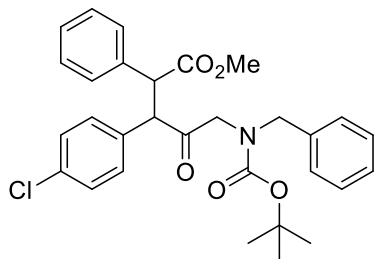

To a vial containing tethered product **6g** (50 mg, 0.10 mmol, 1.0 equiv.) was added HFIP (1.0 mL) and trifluoroacetic acid (31  $\mu$ L, 0.40 mmol, 4.0 equiv.). The reaction is stirred at room temperature for 16 h, then concentrated *in vacuo*. The crude mixture is then dissolved in DCM (1 mL), cooled to 0 °C, and Et<sub>3</sub>N (70  $\mu$ L, 0.50 mmol, 5.0 equiv.) and Boc<sub>2</sub>O (65 mg, 0.3 mmol, 3.0 equiv.) are added sequentially. The reaction was then stirred at room temperature for 2 h, then quenched with water (3 mL) and extracted with DCM (3 x 3 mL). The combined organic fractions were combined and dried over anhydrous Na<sub>2</sub>SO<sub>4</sub>, filtered and concentrated *in vacuo*. The crude residue was then purified via preparatory thin layer chromatography (SiO<sub>2</sub>, 50% Et<sub>2</sub>O in pentane) to afford **12** as an amorphous solid and as an inseparable mixture of diastereoisomers (38 mg, 0.073 mmol, 73%, 2:1 d.r.). The d.r. was determined by comparison of the integrals of Boc group C(CH<sub>3</sub>)<sub>3</sub> signal.

TLC: R<sub>f</sub> = 0.50 (SiO<sub>2</sub>, 30% Et<sub>2</sub>O in pentane).

<sup>1</sup>H NMR (400 MHz, CDCl<sub>3</sub>)  $\delta$  7.48 – 7.40 (m, 2H major, 2H minor, ArH), 7.37 – 7.28 (m, 7H major, 7H minor, ArH), 7.22 – 7.14 (m, 3H major, 3H minor, ArH), 6.80 – 6.70 (m, 2H major, 2H minor, ArH), 4.55 (d, *J* = 11.7 Hz, 1H minor, ArCHCO), 4.46 – 4.35 (m, 2H major, 1H minor, ArCHCO), 4.26 (d, *J* = 14.9 Hz, 1H major, CH<sub>2</sub>), 3.91 (d, *J* = 15.6 Hz, 1H minor), 3.84 – 3.75 (m, 1H major, 1H minor, CH<sub>2</sub>), 3.75 – 3.67 (m, 1H major, 1H minor, CH<sub>2</sub>), 3.66 – 3.58 (m, 1H minor, CH<sub>2</sub>), 3.41 (s, 3H major, 3H minor, CO<sub>2</sub>CH<sub>3</sub>), 3.32 (d, *J* = 18.7 Hz, 1H major, CH<sub>2</sub>), 1.42 (s, 9H minor, C(CH<sub>3</sub>)<sub>3</sub>), 1.10 (s, 9H major, C(CH<sub>3</sub>)<sub>3</sub>)

<sup>13</sup>C NMR (101 MHz, CDCl<sub>3</sub>)  $\delta$  203.5 (minor), 202.5 (major), 171.9 (minor), 171.9 (major), 155.4 (major), 155.3 (minor), 137.1 (minor), 136.9 (major), 136.2 (minor), 136.2 (major), 134.2 (major), 134.1 (minor), 133.8 (major), 133.7 (minor), 130.2 (minor), 130.1 (major), 129.2 (major), 128.9 (major), 128.9 (minor), 128.6 (minor), 128.6 (major), 128.4 (major), 128.3 (minor), 128.1 (major), 128.0 (minor), 127.5 (minor), 127.4 (major), 127.3 (minor), 80.6 (minor), 80.2 (major), 57.7 (major), 57.7 (minor), 55.4 (major), 54.8 (minor), 54.2 (minor), 54.1 (major), 52.1 (major), 52.1 (minor), 50.3 (minor), 50.2 (major), 28.3 (minor), 27.8 (major). 2C not resolved.

HRMS (ESI/QTOF) *m/z*: [M + Na]<sup>+</sup> Calcd for C<sub>30</sub>H<sub>32</sub>ClNNaO<sub>5</sub><sup>+</sup> 544.1861; Found 544.1844.

IR ( $\nu_{\text{max}}$ , cm<sup>-1</sup>) 2975 (m), 1730 (s), 1697 (s), 1491 (m), 1453 (m), 1429 (m), 1392 (m), 1366 (m), 1238 (s), 1159 (s), 912 (m).

## Methyl 5-(*N*-benzylacetamido)-3-(4-chlorophenyl)-4-oxo-2-phenylpentanoate (**13**)

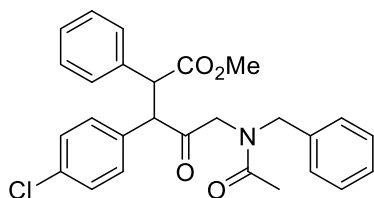

To a vial containing tethered product **6g** (50 mg, 0.10 mmol, 1.0 equiv.) was added HFIP (1.0 mL) and trifluoroacetic acid (31  $\mu$ L, 0.40 mmol, 4.0 equiv.). The reaction is stirred at room temperature for 16 h, then concentrated *in vacuo*. The crude mixture is then dissolved in DCM (1 mL), cooled to 0  $^{\circ}$ C, and Et<sub>3</sub>N (42  $\mu$ L, 0.30 mmol, 3.0 equiv.) and AcCl (14  $\mu$ L, 0.2 mmol, 2.0 equiv.) are added sequentially. The reaction was then stirred at room temperature for 1 h, then quenched with water (3 mL) and extracted with DCM (3 x 3 mL). The combined organic fractions were combined and dried over anhydrous Na<sub>2</sub>SO<sub>4</sub>, filtered and concentrated *in vacuo*. The crude residue was then purified via preparatory thin layer chromatography (SiO<sub>2</sub>, 50% Et<sub>2</sub>O in pentane) to afford **13** as a white amorphous solid and as an inseparable mixture of diastereoisomers (24 mg, 0.052 mmol, 52%, 1.4:1 d.r.). The d.r. was determined by comparison of the integrals of Ac group COCH<sub>3</sub> signal.

TLC: R<sub>f</sub> = 0.44 (SiO<sub>2</sub>, 50% Et<sub>2</sub>O in pentane)

<sup>1</sup>H NMR (400 MHz, CDCl<sub>3</sub>)  $\delta$  7.47 – 7.40 (m, 2H major, 2H minor, ArH), 7.37 – 7.26 (m, 7H major, 7H minor, ArH), 7.25 – 7.09 (m, 3H major, 3H minor, ArH), 6.82 – 6.76 (m, 2H major, ArH), 6.76 – 6.72 (m, 2H minor, ArH), 4.51 (d, *J* = 11.7 Hz, 1H major, ArCHCO), 4.42 – 4.37 (m, 1H major, 2H minor, ArCHCO), 4.23 – 4.12 (m, 2H minor, CH<sub>2</sub>), 4.05 (d, *J* = 7.1 Hz, 1H major, CH<sub>2</sub>), 4.01 (d, *J* = 8.0 Hz, 1H major, CH<sub>2</sub>), 3.84 (d, *J* = 13.1 Hz, 1H major, CH<sub>2</sub>), 3.79 (d, *J* = 16.0 Hz, 1H minor, CH<sub>2</sub>), 3.73 (d, *J* = 17.4 Hz, 1H major, CH<sub>2</sub>), 3.56 (d, *J* = 19.4 Hz, 1H minor, CH<sub>2</sub>), 3.43 (s, 3H minor, CO<sub>2</sub>CH<sub>3</sub>), 3.41 (s, 3H major, CO<sub>2</sub>CH<sub>3</sub>), 2.08 (s, 3H major, NHCOCH<sub>3</sub>), 1.35 (s, 3H minor, CO<sub>2</sub>CH<sub>3</sub>).

<sup>13</sup>C NMR (101 MHz, CDCl<sub>3</sub>)  $\delta$  202.6 (major), 202.2 (minor), 171.9 (major), 171.8 (minor), 171.0 (minor), 170.9 (major), 136.4 (minor), 136.3 (major), 136.1 (minor), 135.7 (major), 134.6 (minor), 134.3 (major), 133.7 (major), 133.1 (minor), 130.3 (major), 130.1 (minor), 129.5 (minor), 129.3 (major), 129.2 (minor), 129.0 (major), 128.9 (major), 128.7 (major 2C), 128.6 (minor 2C), 128.5 (minor), 128.2 (minor), 127.9 (major), 127.7 (minor), 126.7 (major), 58.2 (minor), 58.1 (major), 57.0 (minor), 54.3 (major), 54.2 (major), 54.1 (minor), 52.3 (minor), 52.2 (major), 52.0 (major), 49.2 (minor), 21.2 (major), 20.6 (minor).

HRMS (Sicrit plasma/LTQ-Orbitrap) *m/z*: [M + H]<sup>+</sup> Calcd for C<sub>27</sub>H<sub>27</sub>ClNO<sub>4</sub><sup>+</sup> 464.1623; Found 464.1620.

IR ( $\nu_{\text{max}}$ , cm<sup>-1</sup>) 3030 (w), 2953 (w), 1729 (s), 1650 (s), 1491 (m), 1431 (s), 1283 (s), 1234 (s), 1159 (s), 1092 (m).

**6-Benzyl-1-(4-chlorophenyl)-5-(trifluoromethyl)-2-(4-(trifluoromethyl)phenyl)-4-oxa-6-azaspiro[2.4]heptan-1-yl)methanol (14)**

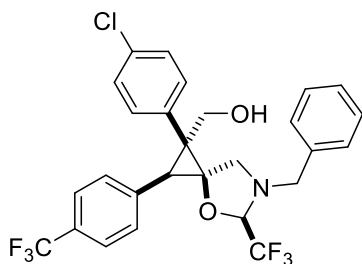

Product **7aa** (114 mg, 0.200 mmol, 1.00 equiv.) was added to a dried flask containing anhydrous THF (2 mL) and cooled to 0 °C. A solution of LiAlH<sub>4</sub> in THF (1 M, 0.40 mL, 0.40 mmol, 2.0 equiv.) was then added to the flask dropwise, and the reaction mixture was warmed to room temperature and stirred for 2 hours. The reaction mixture was then cooled to 0 °C and water was added slowly dropwise, followed by the addition of EtOAc (10 mL) to destroy excess LiAlH<sub>4</sub>. Water (1 mL) was then added to the solution and a white precipitate formed. The solution was decanted into a flask, and the precipitate was washed with Et<sub>2</sub>O (3 x 8 mL). The combined organic fractions were dried over anhydrous Na<sub>2</sub>SO<sub>4</sub>, filtered and concentrated *in vacuo*. The crude residue was then purified by flash column chromatography (SiO<sub>2</sub>, 4 g, 10 - 35% Et<sub>2</sub>O in pentane) to afford **14** as a white solid (90 mg, 0.17 mmol, 83%).

Melting Point: 136 – 138 °C.

TLC: R<sub>f</sub> = 0.143 (SiO<sub>2</sub>, 20% Et<sub>2</sub>O in pentane).

<sup>1</sup>H NMR (400 MHz, CDCl<sub>3</sub>) δ 7.40 (d, *J* = 8.3 Hz, 2H, ArH), 7.34 – 7.26 (m, 5H, ArH), 7.26 – 7.23 (m, 2H, ArH), 7.03 – 6.94 (m, 4H, ArH), 4.68 (q, *J* = 5.5 Hz, 1H, CHCF<sub>3</sub>), 4.00 (d, *J* = 12.6 Hz, 1H, CH<sub>2</sub>), 3.90 – 3.76 (m, 3H, CH<sub>2</sub>OH, CH<sub>2</sub>), 3.56 (dd, *J* = 11.6, 4.5 Hz, 1H, CH<sub>2</sub>), 3.21 – 3.07 (m, 1H, CH<sub>2</sub>), 2.37 (s, 1H, CH), 1.52 (br s, 1H, OH).

<sup>13</sup>C NMR (101 MHz, CDCl<sub>3</sub>) δ 139.5, 137.2, 133.8, 133.4, 131.8, 129.8, 128.8, 128.8, 128.7, 128.1 (q, *J*<sub>C-F</sub> = 32.5 Hz), 128.0, 124.5 (q, *J*<sub>C-F</sub> = 3.8 Hz), 124.5 (d, *J*<sub>C-F</sub> = 272.0 Hz), 123.2 (d, *J*<sub>C-F</sub> = 283.5 Hz), 93.0 (q, *J*<sub>C-F</sub> = 34.0 Hz), 71.9, 69.6, 60.4, 55.9, 37.0, 36.4.

<sup>19</sup>F NMR (376 MHz, CDCl<sub>3</sub>) δ -62.3 (s, 1F), -79.8 (d, *J* = 5.4 Hz, 1F).

HRMS (ESI/QTOF) *m/z*: [M + H]<sup>+</sup> Calcd for C<sub>27</sub>H<sub>23</sub>ClF<sub>6</sub>NO<sub>2</sub><sup>+</sup> 542.1316; Found 542.1324.

IR (ν<sub>max</sub>, cm<sup>-1</sup>) 3380 (w), 3063 (w), 3031 (w), 2946 (w), 2885 (w), 1618 (w), 1494 (m), 1327 (s), 1292 (m), 1169 (s), 1118 (s), 1016 (m), 844 (m), 735 (m).

**Methyl (-6-benzyl-1-(4-chlorophenyl)-5-(trifluoromethyl)-2-(4-(trifluoromethyl)phenyl)-4-oxa-6-azaspiro[2.4]heptane-1-carbonyl)glycinate (15)**

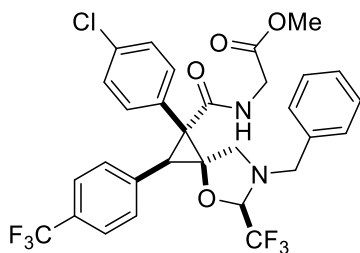

Product **7aa** (57 mg, 0.10 mmol, 1.0 equiv.) was dissolved in a mixture of THF/water (9:1, 1 mL) containing LiOH (10 mg, 0.42 mmol, 4.2 equiv.). The reaction mixture was stirred for 16 h at room temperature, then diluted with water (3 mL) and acidified with 2 M HCl until pH = 1. The aqueous layer was then extracted with DCM (3 x 15 mL), and the combined organic fractions were dried over anhydrous Na<sub>2</sub>SO<sub>4</sub>, filtered and concentrated *in vacuo*. The resulting acid was used immediately in the next step without further purification.

The intermediate carboxylic acid (0.1 mmol) was used directly from previous reaction and dissolved in anhydrous DMF (1 mL). HATU (49 mg, 0.13 mmol, 1.3 equiv.) and DIPEA (52 μL, 0.30 mmol, 3.0 equiv.) were added to this solution and stirred at room temperature for 5 minutes before adding glycine methyl ester HCl (16 mg, 0.13 mmol, 1.3 equiv.). The reaction was stirred for 16 h at room temperature, and then diluted with EtOAc (15 mL), and washed with 10% LiCl (3 x 15 mL). The combined organic fractions were dried over anhydrous Na<sub>2</sub>SO<sub>4</sub>, filtered and concentrated *in vacuo*. The crude residue was then purified by flash column chromatography

(SiO<sub>2</sub>, 4 g, 15-35% Et<sub>2</sub>O in pentane) to afford **15** as a colourless amorphous foam (51 mg, 0.081 mmol, 81%).

TLC: R<sub>f</sub> = 0.14 (SiO<sub>2</sub>, 20% Et<sub>2</sub>O in pentane).

<sup>1</sup>H NMR (400 MHz, CDCl<sub>3</sub>) δ 7.41 (d, *J* = 8.2 Hz, 2H, ArH), 7.34 – 7.28 (m, 2H, ArH), 7.27 – 7.19 (m, 5H, ArH), 7.04 (dd, *J* = 10.4, 8.1 Hz, 4H, ArH), 5.76 (t, *J* = 5.5 Hz, 1H, CONH), 4.81 (q, *J* = 5.7 Hz, 1H, CHCF<sub>3</sub>), 3.99 – 3.83 (m, 3H, CH<sub>2</sub>, CH<sub>2</sub>), 3.82 – 3.73 (m, 2H, CH<sub>2</sub>, CH<sub>2</sub>), 3.69 (s, 3H, CO<sub>2</sub>CH<sub>3</sub>), 3.57 – 3.49 (m, 1H, CH<sub>2</sub>), 3.40 (s, 1H, CH).

<sup>13</sup>C NMR (101 MHz, CDCl<sub>3</sub>) δ 170.5, 169.8, 138.4, 137.0, 135.1, 134.3, 130.4, 129.3, 128.8, 128.8, 128.8 (q, *J*<sub>C-F</sub> = 32.4 Hz), 128.7, 128.0, 124.6 (q, *J*<sub>C-F</sub> = 3.6 Hz), 124.4 (d, *J*<sub>C-F</sub> = 271.8 Hz), 123.2 (q, *J*<sub>C-F</sub> = 283.9 Hz), 73.5, 60.6, 57.1, 52.5, 42.0, 40.1, 38.2.

<sup>19</sup>F NMR (376 MHz, CDCl<sub>3</sub>) δ -62.4, -79.3 (d, *J* = 6.0 Hz).

HRMS (ESI/QTOF) *m/z*: [M + Na]<sup>+</sup> Calcd for C<sub>30</sub>H<sub>25</sub>ClF<sub>6</sub>N<sub>2</sub>NaO<sub>4</sub><sup>+</sup> 649.1299; Found 649.1305.

IR (ν<sub>max</sub>, cm<sup>-1</sup>) 3652 (w), 3426 (w), 3066 (w), 2974 (m), 2903 (m), 1751 (m), 1665 (m), 1511 (m), 1497 (m), 1326 (s), 1218 (m), 1171 (s), 1120 (s), 768 (s).

### Methyl 1-(4-chlorophenyl)-5-(trifluoromethyl)-2-(4-(trifluoromethyl)phenyl)-4-oxa-6-azaspiro[2.4]heptane-1-carboxylate (**16a**)

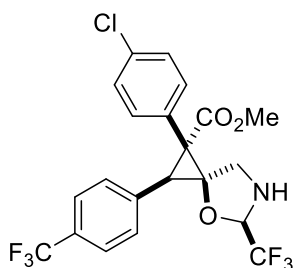

An 8 mL microwave vial equipped with a stirring bar was charged with Pd/C (20 mol%) and **7aa** (57 mg, 0.10 mmol, 1.0 equiv.). The flask was sealed, evacuated and back-filled with N<sub>2</sub> three times. EtOAc (2 mL) was then added and the resulting suspension was stirred at room temperature for 10 minutes under a nitrogen flow. Then, a balloon containing hydrogen was connected to the flask through a needle and the mixture was vigorously stirred at room temperature for 16 h. Then, the reaction mixture was degassed by bubbling nitrogen for 10 minutes and the suspension was filtered through syringe filter and concentrated *in vacuo*. The crude material was then purified by preparatory thin layer chromatography (SiO<sub>2</sub>, 10% EtOAc in pentane) to afford **16a** as an off-white powder (42 mg, 0.087 mmol, 87%).

Melting Point: 189 – 191 °C.

TLC: R<sub>f</sub> = 0.50 (SiO<sub>2</sub>, 15% EtOAc in pentane).

<sup>1</sup>H NMR (400 MHz, CDCl<sub>3</sub>) δ 7.38 (d, *J* = 8.1 Hz, 2H, ArH), 7.25 – 7.16 (m, 2H, ArH), 7.03 (d, *J* = 8.1 Hz, 2H, ArH), 6.95 – 6.87 (m, 2H, ArH), 5.05 (q, *J* = 5.6 Hz, 1H, CHCF<sub>3</sub>), 3.70 (d, *J* = 13.0 Hz, 1H, CH<sub>2</sub>), 3.66 (s, 3H, CO<sub>2</sub>CH<sub>3</sub>), 3.62 (d, *J* = 12.5 Hz, 1H, CH<sub>2</sub>), 3.25 (s, 1H, CH).

<sup>13</sup>C NMR (101 MHz, CDCl<sub>3</sub>) δ 172.0, 138.4, 134.0, 134.0, 130.5, 128.9 (q, *J*<sub>C-F</sub> = 32.5 Hz), 128.9, 128.3, 124.6 (q, *J*<sub>C-F</sub> = 3.0 Hz), 124.3 (d, *J*<sub>C-F</sub> = 271.9 Hz), 121.8 (q, *J*<sub>C-F</sub> = 283.3 Hz), 75.0, 53.4, 51.7, 40.0, 39.2.

<sup>19</sup>F NMR (376 MHz, CDCl<sub>3</sub>) δ -62.5, -80.4 (d, *J* = 5.6 Hz).

HRMS (APCI/QTOF) *m/z*: [M + Na]<sup>+</sup> Calcd for C<sub>21</sub>H<sub>16</sub>ClF<sub>6</sub>NNaO<sub>3</sub><sup>+</sup> 502.0615; Found 502.0608.

IR ( $\nu_{\text{max}}$ ,  $\text{cm}^{-1}$ ) 3349 (w), 3033 (w), 2956 (w), 2892 (w), 2847 (w), 1719 (m), 1619 (w), 1495 (m), 1326 (s), 1236 (m), 1168 (s), 1146 (s), 1117 (s), 1071 (s), 911 (m), 736 (s).

**Methyl 4-(2-phenyl-2,5-bis(trifluoromethyl)-4-oxa-6-azaspiro[2.4]heptan-1-yl)benzoate (16b)**

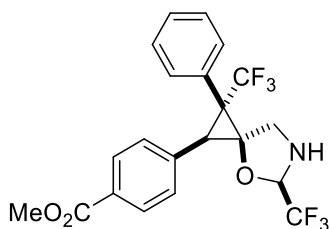

An 8 mL microwave vial equipped with a stirring bar was charged with Pd/C (20 mol%) and **7i** (102 mg, 0.191 mmol, 1.00 equiv.). The flask was sealed, evacuated and back-filled with N<sub>2</sub> three times. EtOAc (2 mL) was then added and the resulting suspension was stirred at room temperature for 10 minutes under a nitrogen flow. Then, a balloon containing hydrogen was connected to the flask through a needle and the mixture was vigorously stirred at room temperature for 16 h. Then, the reaction mixture was degassed by bubbling nitrogen for 10 minutes and the suspension was filtered through syringe filter and concentrated *in vacuo*. The crude material was then purified by preparatory thin layer chromatography (SiO<sub>2</sub>, 30% Et<sub>2</sub>O in pentane) to afford **16b** as a white solid (72 mg, 0.15 mmol, 85%).

Melting Point: 133 – 135 °C.

TLC:  $R_f = 0.31$  ( $\text{SiO}_2$ , 30%  $\text{Et}_2\text{O}$  in pentane).

<sup>1</sup>H NMR (400 MHz, CDCl<sub>3</sub>) δ 7.81 – 7.74 (m, 2H, ArH), 7.36 – 7.28 (m, 1H, ArH), 7.27 – 7.20 (m, 2H, ArH), 7.11 – 7.02 (m, 2H, ArH), 7.01 – 6.91 (m, 2H, ArH), 5.00 (q, *J* = 5.5 Hz, 1H, CHCF<sub>3</sub>), 3.91 – 3.79 (m, 4H, CH<sub>2</sub>, CO<sub>2</sub>CH<sub>3</sub>), 3.60 – 3.45 (m, 1H, CH<sub>2</sub>), 2.84 (s, 1H, CH).

<sup>13</sup>C NMR (101 MHz, CDCl<sub>3</sub>) δ 166.9, 138.9, 133.5, 130.1, 128.8, 128.7, 128.5, 127.8, 126.7, 125.1 (q, *J*<sub>C-F</sub> = 275.6 Hz), 123.0 (q, *J*<sub>C-F</sub> = 283.1 Hz), 88.3 (q, *J*<sub>C-F</sub> = 34.7 Hz), 71.1 (q, *J*<sub>C-F</sub> = 1.5 Hz), 52.1, 51.0, 38.2 (q, *J*<sub>C-F</sub> = 32.4 Hz), 34.4 (q, *J*<sub>C-F</sub> = 2.6 Hz).

<sup>19</sup>F NMR (376 MHz, CDCl<sub>3</sub>) δ -66.8, -80.7 (d, *J* = 5.5 Hz).

HRMS (Nanochip-based ESI/LTQ-Orbitrap) m/z: [M + H]<sup>+</sup> Calcd for C<sub>21</sub>H<sub>18</sub>F<sub>6</sub>NO<sub>3</sub><sup>+</sup> 446.1185; Found 446.1188.

IR ( $\nu_{\text{max}}$ ,  $\text{cm}^{-1}$ ) 3345 (w), 3062 (w), 3013 (w), 2956 (w), 2893 (w), 2849 (w), 1713 (m), 1611 (w), 1439 (w), 1283 (s), 1140 (s), 1115 (s), 1041 (m), 757 (m).

# DFT Calculations

SMILES were generated for all possible diastereomers of compound **6b**. Rough 3D geometries were obtained with Open Babel,<sup>19</sup> followed by a first GFN2-xTB geometry optimization. Conformers for each isomers were generated with Crest also at the GFN2-xTB level.<sup>20,21</sup> Final energies were then computed with DFT using Gaussian16<sup>22</sup> at the  $\omega$ B97X-D/def2-TZVP// $\omega$ B97X-D/def2-SVP level.<sup>23–25</sup>

**Table S3.** SMILES for all 8 possible diastereomers of cyclopropane **6b**.

| Isomer | SMILES                                                                                             |
|--------|----------------------------------------------------------------------------------------------------|
| D1     | <chem>O=C(OC)[C@@]1(C2=CC=CC=C2)[C@H](C3=CC=CC=C3)[C@]14O[C@@H](C(F)(F)F)N(CC5=CC=CC=C5)C4</chem>  |
| D2     | <chem>O=C(OC)[C@]1(C2=CC=CC=C2)[C@H](C3=CC=CC=C3)[C@]14O[C@@H](C(F)(F)F)N(CC5=CC=CC=C5)C4</chem>   |
| D3     | <chem>O=C(OC)[C@@]1(C2=CC=CC=C2)[C@@H](C3=CC=CC=C3)[C@]14O[C@@H](C(F)(F)F)N(CC5=CC=CC=C5)C4</chem> |
| D4     | <chem>O=C(OC)[C@@]1(C2=CC=CC=C2)[C@H](C3=CC=CC=C3)[C@@]14O[C@@H](C(F)(F)F)N(CC5=CC=CC=C5)C4</chem> |
| D5     | <chem>O=C(OC)[C@@]1(C2=CC=CC=C2)[C@H](C3=CC=CC=C3)[C@]14O[C@H](C(F)(F)F)N(CC5=CC=CC=C5)C4</chem>   |
| D6     | <chem>O=C(OC)[C@]1(C2=CC=CC=C2)[C@H](C3=CC=CC=C3)[C@]14O[C@H](C(F)(F)F)N(CC5=CC=CC=C5)C4</chem>    |
| D7     | <chem>O=C(OC)[C@]1(C2=CC=CC=C2)[C@H](C3=CC=CC=C3)[C@@]14O[C@@H](C(F)(F)F)N(CC5=CC=CC=C5)C4</chem>  |
| D8     | <chem>[C@@]1([C@]2([C@H]1c1ccccc1)O[C@@H](N(C2)Cc1ccccc1)C(F)(F)F)(c1ccccc1)C(=O)OC</chem>         |

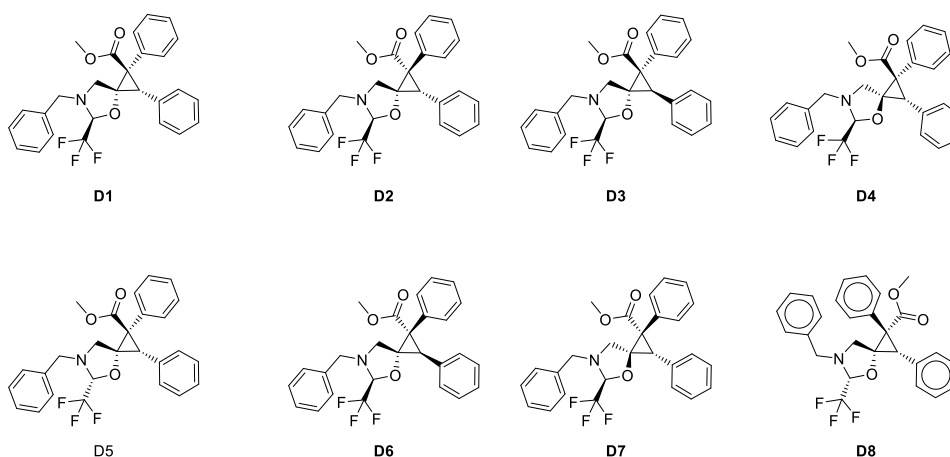

**Figure S3.** Structures of 8 possible diastereomers of spirocyclopropane **6b**.

**Table S4.** Gibbs free energies of diastereomers of **6b**. Isomers D1 and D5 are most stable and degenerate in energy.

| Isomer | G (Ha)       | $\Delta$ G (kcal/mol) |
|--------|--------------|-----------------------|
| D1     | -1622.965877 | 0                     |
| D2     | -1622.959335 | 4.105166979           |
| D3     | -1622.962443 | 2.154867534           |
| D4     | -1622.962204 | 2.304842298           |

|    |              |             |
|----|--------------|-------------|
| D5 | -1622.965769 | 0.067771023 |
| D6 | -1622.961471 | 2.764806743 |
| D7 | -1622.960892 | 3.128134728 |
| D8 | -1622.957338 | 5.358303399 |

# X-ray Crystallographic Data

## Methyl 6-benzyl-2-(4-nitrophenyl)-1-phenyl-5-(trifluoromethyl)-4-oxa-6-azaspiro[2.4]heptane-1-carboxylate **6j**

CCDC deposition number: 2451792

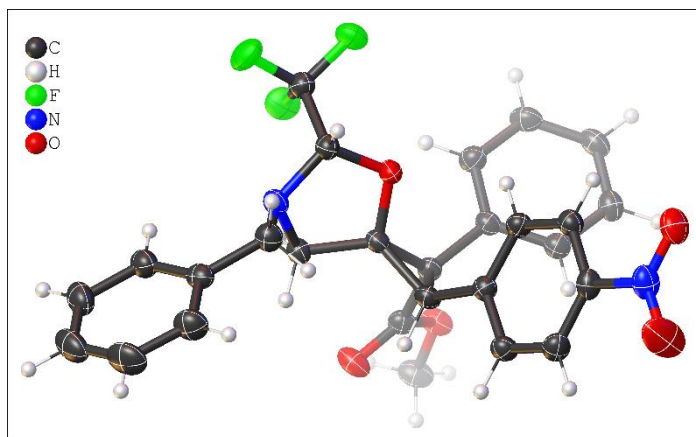

Crystals of compound **6j** were collected upon crystallization via slow evaporation with EtOH in heptane.

**Experimental.** Single colourless prism-shaped crystals of **6j** were used as supplied. A suitable crystal with dimensions  $0.13 \times 0.09 \times 0.05$  mm<sup>3</sup> was selected and mounted on an XtaLAB Synergy R, DW system, HyPix-Arc 150 diffractometer. The crystal was kept at a steady  $T = 140.00(10)$  K during data collection. The structure was solved with the ShelXT 2018/2 (Sheldrick, 2015) solution program using dual methods and by using Olex2 1.5 (Dolomanov et al., 2009) as the graphical interface. The model was refined with ShelXL 2019/3 (Sheldrick, 2015) using full matrix least squares minimisation on  $F^2$ .

**Crystal Data.** C<sub>27</sub>H<sub>23</sub>N<sub>2</sub>O<sub>5</sub>F<sub>3</sub>,  $M_r = 512.47$ , monoclinic,  $C2/c$  (No. 15),  $a = 25.4150(5)$  Å,  $b = 9.44890(15)$  Å,  $c = 21.1616(3)$  Å,  $\beta = 110.432(2)^\circ$ ,  $\alpha = \gamma = 90^\circ$ ,  $V = 4762.11(15)$  Å<sup>3</sup>,  $T = 140.00(10)$  K,  $Z = 8$ ,  $Z' = 1$ ,  $\mu(\text{Cu } K\alpha) = 0.975$ , 23714 reflections measured, 4842 unique ( $R_{\text{int}} = 0.0349$ ) which were used in all calculations. The final  $wR_2$  was 0.1121 (all data) and  $R_1$  was 0.0413 ( $I \geq \sigma(I)$ ).

| Compound                              | <b>6j</b>                                                                    |
|---------------------------------------|------------------------------------------------------------------------------|
| Formula                               | C <sub>27</sub> H <sub>23</sub> N <sub>2</sub> O <sub>5</sub> F <sub>3</sub> |
| $D_{\text{calc.}} / \text{g cm}^{-3}$ | 1.430                                                                        |
| $\mu / \text{mm}^{-1}$                | 0.975                                                                        |
| Formula Weight                        | 512.47                                                                       |
| Colour                                | colourless                                                                   |
| Shape                                 | prism-shaped                                                                 |
| Size/mm <sup>3</sup>                  | 0.13×0.09×0.05                                                               |
| $T/\text{K}$                          | 140.00(10)                                                                   |
| Crystal System                        | monoclinic                                                                   |
| Space Group                           | $C2/c$                                                                       |
| $a/\text{\AA}$                        | 25.4150(5)                                                                   |
| $b/\text{\AA}$                        | 9.44890(15)                                                                  |
| $c/\text{\AA}$                        | 21.1616(3)                                                                   |
| $\alpha/^\circ$                       | 90                                                                           |
| $\beta/^\circ$                        | 110.432(2)                                                                   |
| $\gamma/^\circ$                       | 90                                                                           |
| $V/\text{\AA}^3$                      | 4762.11(15)                                                                  |
| $Z$                                   | 8                                                                            |
| $Z'$                                  | 1                                                                            |
| Wavelength/Å                          | 1.54184                                                                      |
| Radiation type                        | CuK $\alpha$                                                                 |
| $\Theta_{\text{min}}/^\circ$          | 3.712                                                                        |
| $\Theta_{\text{max}}/^\circ$          | 75.535                                                                       |
| Measured Refl's.                      | 23714                                                                        |
| Indep't Refl's                        | 4842                                                                         |
| Refl's $I \geq 2 \sigma(I)$           | 3952                                                                         |
| $R_{\text{int}}$                      | 0.0349                                                                       |
| Parameters                            | 335                                                                          |
| Restraints                            | 0                                                                            |
| Largest Peak/e Å <sup>-3</sup>        | 0.320                                                                        |
| Deepest Hole/e Å <sup>-3</sup>        | -0.390                                                                       |
| GooF                                  | 1.050                                                                        |
| $wR_2$ (all data)                     | 0.1121                                                                       |
| $wR_2$                                | 0.1062                                                                       |
| $R_1$ (all data)                      | 0.0514                                                                       |
| $R_1$                                 | 0.0413                                                                       |
| CCDC number                           | 2451792                                                                      |



## Structure Quality Indicators

|              |                                             |       |                 |      |                |       |                              |       |
|--------------|---------------------------------------------|-------|-----------------|------|----------------|-------|------------------------------|-------|
| Reflections: | d min (CuK $\alpha$ )<br>2 $\theta$ =151.1° | 0.80  | I/ $\sigma$ (I) | 37.0 | Rint<br>m=5.11 | 3.49% | Full 135.4°<br>98% to 151.1° | 100   |
|              | Shift                                       | 0.001 | Max Peak        | 0.3  | Min Peak       | -0.4  | GooF                         | 1.050 |

A colourless prism-shaped crystal with dimensions  $0.13 \times 0.09 \times 0.05$  mm<sup>3</sup> was mounted. Data were collected using an XtaLAB Synergy R, DW system, HyPix-Arc 150 diffractometer operating at  $T = 140.00(10)$  K.

Data were measured using  $\omega$  scans with CuK $\alpha$  radiation. The diffraction pattern was indexed and the total number of runs and images was based on the strategy calculation from the program CrysAlisPro system (CCD 43.94a 64-bit (release 20-10-2023)). The maximum resolution achieved was  $\theta = 75.535^\circ$  (0.80 Å).

The unit cell was refined using CrysAlisPro 1.171.43.94a (Rigaku OD, 2023) on 13170 reflections, 56% of the observed reflections.

Data reduction, scaling and absorption corrections were performed using CrysAlisPro 1.171.43.94a (Rigaku OD, 2023). The final completeness is 100.00 % out to  $75.535^\circ$  in  $\theta$ . A Gaussian absorption correction was performed using CrysAlisPro 1.171.43.94a (Rigaku Oxford Diffraction, 2024) Numerical absorption correction based on Gaussian integration over a multifaceted crystal model. Empirical absorption correction using spherical harmonics as implemented in SCALE3 ABSPACK scaling algorithm. The absorption coefficient  $\mu$  of this material is 0.975 mm<sup>-1</sup> at this wavelength ( $\lambda = 1.54184$  Å) and the minimum and maximum transmissions are 0.904 and 1.000.

The structure was solved and in space group  $C2/c$  (# 15) by the ShelXT 2018/2 (Sheldrick, 2015) structure solution program using dual methods and refined by full matrix least squares minimisation on  $F^2$  using version 2019/3 of ShelXL 2019/3 (Sheldrick, 2015). All non-hydrogen atoms were refined anisotropically. Hydrogen atom positions were calculated geometrically and refined using the riding model.

There is a single formula unit in the asymmetric unit, which is represented by the reported sum formula. In other words: Z is 8 and Z' is 1. The moiety formula is C<sub>27</sub> H<sub>23</sub> F<sub>3</sub> N<sub>2</sub> O<sub>5</sub>.

## Citations

CrysAlis<sup>Pro</sup> Software System, Rigaku Oxford Diffraction, (2023).

O.V. Dolomanov and L.J. Bourhis and R.J. Gildea and J.A.K. Howard and H. Puschmann, Olex2: A complete structure solution, refinement and analysis program, *J. Appl. Cryst.*, (2009), **42**, 339-341.

Sheldrick, G.M., Crystal structure refinement with ShelXL, *Acta Cryst.*, (2015), **C71**, 3-8.

Sheldrick, G.M., ShelXT-Integrated space-group and crystal-structure determination, *Acta Cryst.*, (2015), **A71**, 3-8.

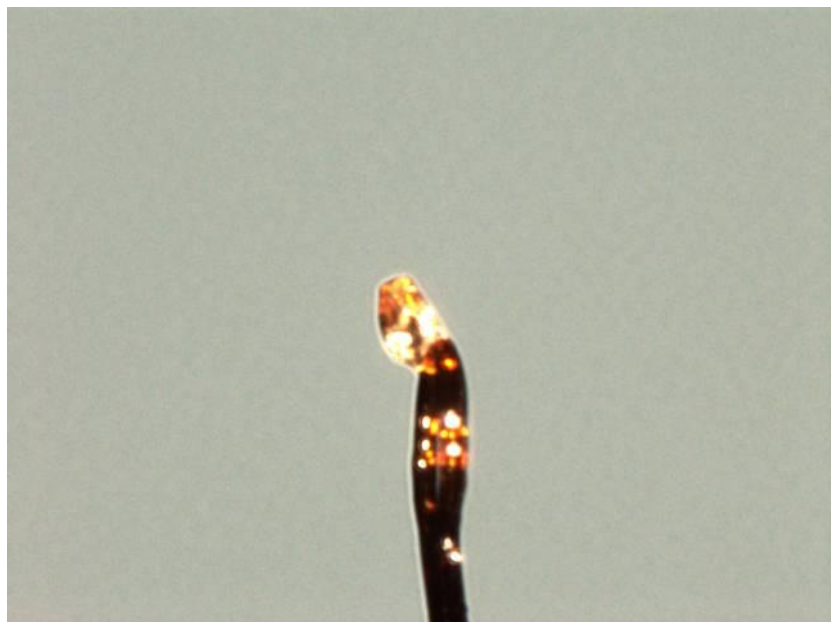

**Figure S4** Image of the **6j** Crystal on the Diffractometer.

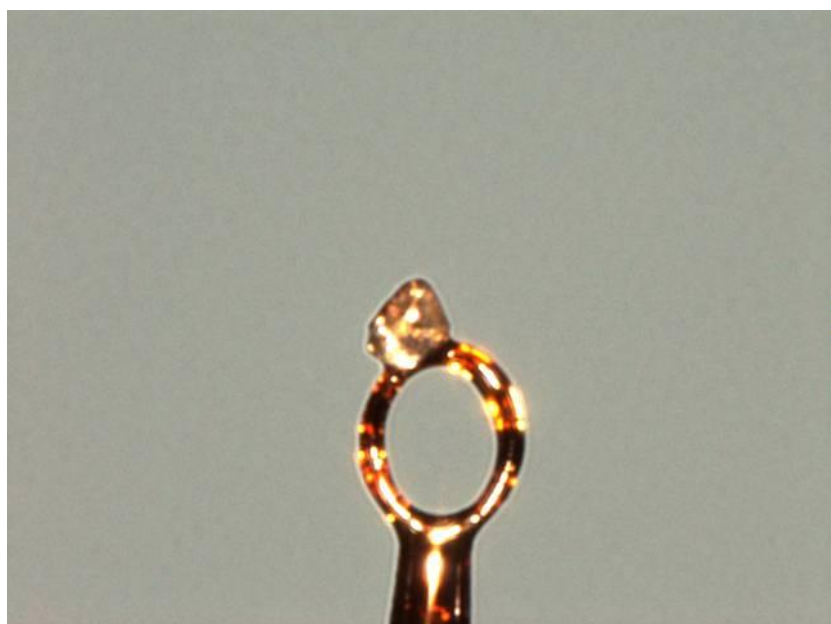

**Figure S5** Image of the **6j** Crystal on the Diffractometer.

## Data Plots: Diffraction Data

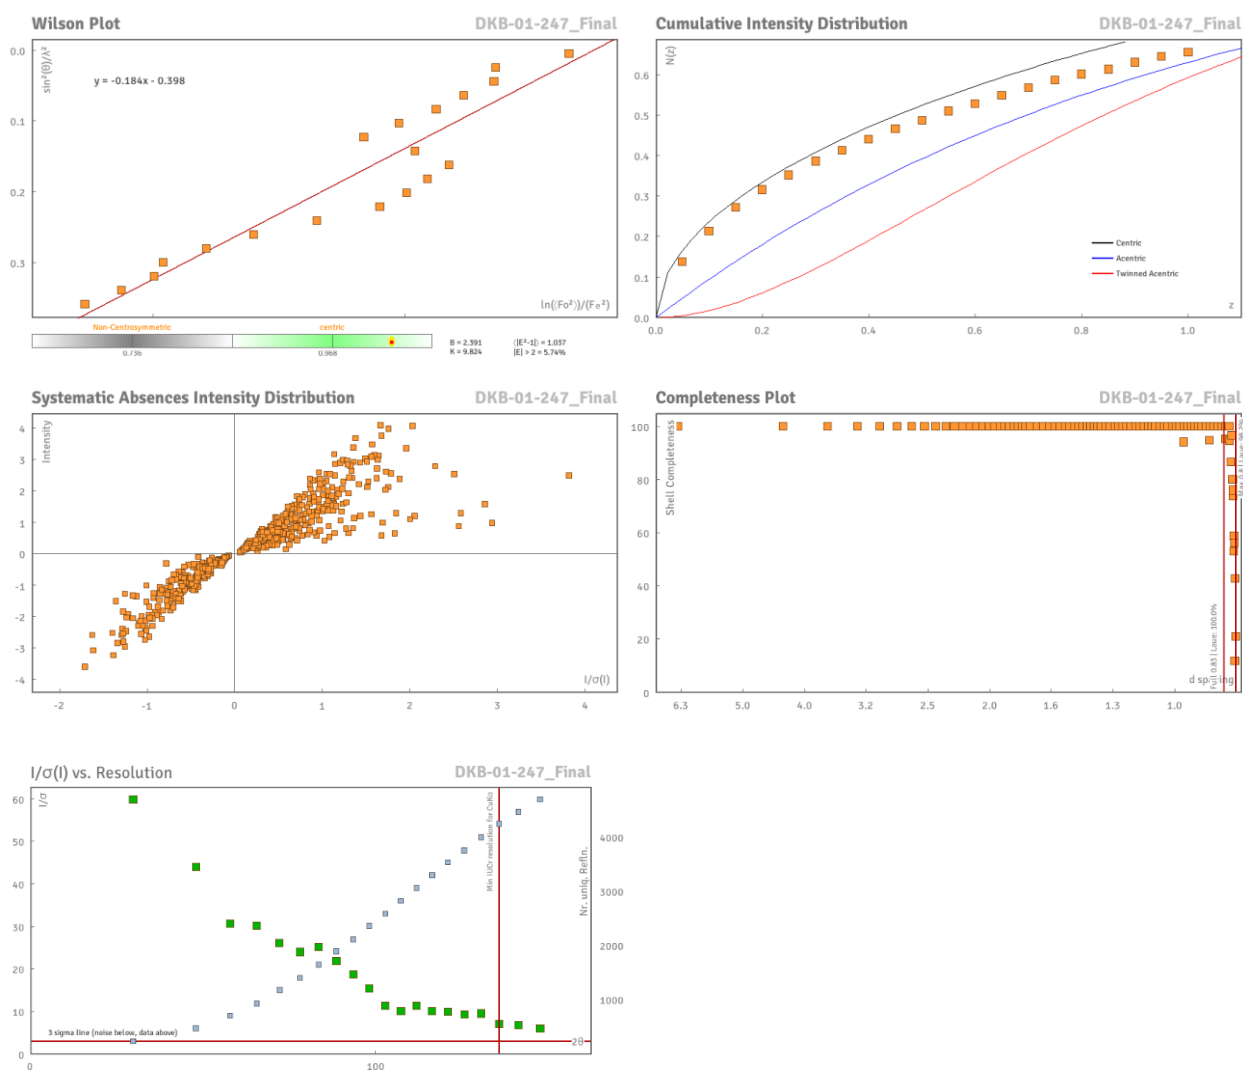

## Data Plots: Refinement and Data

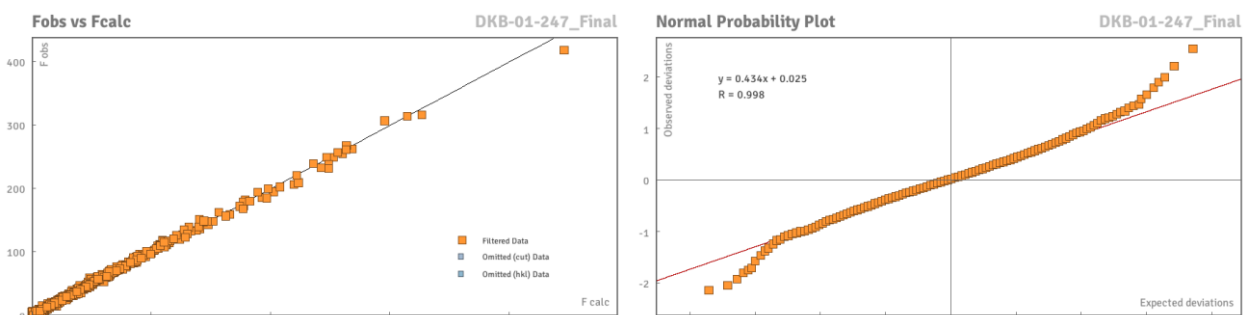

## Reflection Statistics

|                                     |              |                          |                 |
|-------------------------------------|--------------|--------------------------|-----------------|
| Total reflections (after filtering) | 24764        | Unique reflections       | 4842            |
| Completeness                        | 0.982        | Mean $I/\sigma$          | 19.65           |
| $hkl_{\max}$ collected              | (31, 11, 26) | $hkl_{\min}$ collected   | (-31, -11, -24) |
| $hkl_{\max}$ used                   | (29, 11, 26) | $hkl_{\min}$ used        | (-31, 0, 0)     |
| Lim $d_{\max}$ collected            | 100.0        | Lim $d_{\min}$ collected | 0.77            |
| $d_{\max}$ used                     | 19.83        | $d_{\min}$ used          | 0.8             |
| Friedel pairs                       | 3887         | Friedel pairs merged     | 1               |

|                             |                                                           |                            |        |
|-----------------------------|-----------------------------------------------------------|----------------------------|--------|
| Inconsistent equivalents    | 0                                                         | R <sub>int</sub>           | 0.0349 |
| R <sub>sigma</sub>          | 0.027                                                     | Intensity transformed      | 0      |
| Omitted reflections         | 0                                                         | Omitted by user (OMIT hkl) | 0      |
| Multiplicity                | (5848, 3885, 1553, 486, 268, 168, 106, 67, 39, 32, 18, 4) | Maximum multiplicity       | 19     |
| Removed systematic absences | 1050                                                      | Filtered off (Shel/OMIT)   | 0      |

**Table S5:** Fractional Atomic Coordinates ( $\times 10^4$ ) and Equivalent Isotropic Displacement Parameters ( $\text{\AA}^2 \times 10^3$ ) for **6j**.  $U_{eq}$  is defined as 1/3 of the trace of the orthogonalised  $U_{ij}$ .

| Atom | x         | y           | z         | $U_{eq}$ |
|------|-----------|-------------|-----------|----------|
| F1   | 7185.0(4) | -621.8(11)  | 4845.8(4) | 38.9(2)  |
| F2   | 6868.9(5) | -2268.8(11) | 4109.6(5) | 48.5(3)  |
| F3   | 6306.4(4) | -1125.9(12) | 4484.3(5) | 43.2(3)  |
| O1   | 6602.8(4) | 1430.9(11)  | 3995.5(5) | 26.6(2)  |
| O2   | 4880.3(5) | 2752.1(14)  | 3276.4(6) | 36.0(3)  |
| O3   | 5094.9(4) | 3797.5(13)  | 4286.5(5) | 30.7(3)  |
| O4   | 8192.6(5) | 6886.6(14)  | 3434.7(6) | 40.7(3)  |
| O5   | 7568.9(7) | 7828(2)     | 2569.2(8) | 75.0(6)  |
| N1   | 6169.4(5) | -252.5(14)  | 3163.3(6) | 25.9(3)  |
| N2   | 7713.9(7) | 6961.0(16)  | 3030.8(7) | 36.5(3)  |
| C1   | 6056.9(6) | 1923.5(16)  | 3623.1(7) | 24.0(3)  |
| C2   | 5848.5(6) | 3115.7(16)  | 3952.4(7) | 23.4(3)  |
| C3   | 6004.5(6) | 3356.8(16)  | 3306.5(7) | 24.1(3)  |
| C4   | 5727.6(6) | 649.7(16)   | 3257.8(7) | 26.3(3)  |
| C5   | 6665.2(6) | 74.7(16)    | 3730.8(7) | 25.0(3)  |
| C6   | 6232.0(7) | -32.3(18)   | 2504.4(7) | 30.2(3)  |
| C7   | 5793.2(7) | -828.6(17)  | 1946.0(8) | 29.3(3)  |
| C8   | 5707.9(8) | -502(2)     | 1275.4(8) | 41.4(4)  |
| C9   | 5325.7(9) | -1272(3)    | 757.7(9)  | 51.1(5)  |
| C10  | 5019.1(9) | -2350(2)    | 898.8(10) | 48.4(5)  |
| C11  | 5096.6(8) | -2672(2)    | 1558.1(9) | 41.8(4)  |
| C12  | 5483.9(7) | -1922.0(18) | 2080.7(8) | 33.6(4)  |
| C13  | 6753.5(7) | -989.0(17)  | 4296.2(8) | 30.3(3)  |
| C14  | 6211.5(6) | 3665.9(16)  | 4629.5(7) | 23.4(3)  |
| C15  | 6396.9(7) | 2753.7(17)  | 5179.9(8) | 29.4(3)  |
| C16  | 6688.7(7) | 3277.8(19)  | 5819.3(8) | 32.9(4)  |
| C17  | 6796.3(7) | 4716.3(19)  | 5914.6(8) | 31.6(4)  |
| C18  | 6622.7(7) | 5627.0(18)  | 5367.4(8) | 30.5(3)  |
| C19  | 6329.9(6) | 5101.7(17)  | 4725.6(7) | 26.4(3)  |
| C20  | 5226.4(6) | 3177.3(17)  | 3794.7(7) | 25.7(3)  |
| C21  | 4503.1(7) | 3966(2)     | 4165.1(8) | 35.8(4)  |
| C22  | 6474.9(6) | 4249.4(16)  | 3275.2(7) | 23.4(3)  |
| C23  | 6345.8(7) | 5197.5(17)  | 2735.0(7) | 27.7(3)  |
| C24  | 6747.3(7) | 6080.3(17)  | 2647.0(8) | 30.6(3)  |
| C25  | 7286.0(7) | 5998.6(17)  | 3103.4(8) | 27.7(3)  |
| C26  | 7435.1(7) | 5064.6(16)  | 3641.5(7) | 26.8(3)  |
| C27  | 7027.2(7) | 4197.7(16)  | 3729.0(7) | 26.0(3)  |

**Table S6:** Anisotropic Displacement Parameters ( $\times 10^4$ ) for **6j**. The anisotropic displacement factor exponent takes the form:  $-2\pi^2[h^2a^{*2} \times U_{11} + \dots + 2hka^* \times b^* \times U_{12}]$

| Atom | $U_{11}$ | $U_{22}$ | $U_{33}$ | $U_{23}$ | $U_{13}$ | $U_{12}$ |
|------|----------|----------|----------|----------|----------|----------|
| F1   | 39.6(6)  | 44.0(6)  | 24.9(5)  | 1.7(4)   | 1.1(4)   | 2.0(4)   |
| F2   | 72.2(8)  | 25.8(5)  | 41.6(6)  | -1.0(4)  | 12.5(6)  | 11.6(5)  |
| F3   | 43.8(6)  | 48.6(6)  | 39.1(5)  | 10.5(5)  | 16.9(5)  | -4.8(5)  |
| O1   | 23.9(5)  | 23.7(5)  | 27.3(5)  | -3.8(4)  | 2.7(4)   | 1.0(4)   |

| Atom | $U_{11}$ | $U_{22}$ | $U_{33}$ | $U_{23}$ | $U_{13}$ | $U_{12}$ |
|------|----------|----------|----------|----------|----------|----------|
| O2   | 24.8(6)  | 53.6(8)  | 26.8(6)  | -7.6(5)  | 5.4(5)   | -1.6(5)  |
| O3   | 24.8(6)  | 43.9(7)  | 24.3(5)  | -1.6(5)  | 9.6(4)   | 2.8(5)   |
| O4   | 35.6(7)  | 42.7(7)  | 45.9(7)  | -6.6(6)  | 17.1(6)  | -10.1(6) |
| O5   | 70.2(11) | 84.0(12) | 57.8(9)  | 36.1(9)  | 6.0(8)   | -33.8(9) |
| N1   | 26.9(7)  | 28.8(7)  | 21.2(6)  | -3.2(5)  | 7.1(5)   | -0.5(5)  |
| N2   | 43.2(9)  | 36.9(8)  | 32.7(7)  | -3.3(6)  | 17.1(7)  | -10.6(7) |
| C1   | 21.1(7)  | 26.9(8)  | 21.4(7)  | -2.0(6)  | 4.2(6)   | 0.0(6)   |
| C2   | 25.1(7)  | 24.7(7)  | 19.7(7)  | 0.4(6)   | 6.9(6)   | -0.2(6)  |
| C3   | 23.4(7)  | 29.2(8)  | 18.1(7)  | 0.0(6)   | 5.2(6)   | 1.2(6)   |
| C4   | 25.3(8)  | 27.7(8)  | 24.4(7)  | -3.3(6)  | 6.9(6)   | -2.5(6)  |
| C5   | 26.2(8)  | 23.9(7)  | 24.8(7)  | -2.8(6)  | 8.6(6)   | 0.4(6)   |
| C6   | 34.5(9)  | 32.2(8)  | 25.2(8)  | -1.6(6)  | 12.1(7)  | -1.1(7)  |
| C7   | 31.4(8)  | 30.7(8)  | 24.1(7)  | -3.7(6)  | 7.7(6)   | 6.3(7)   |
| C8   | 47.5(11) | 48.3(11) | 27.0(8)  | -0.1(8)  | 11.4(8)  | 3.7(9)   |
| C9   | 57.9(13) | 67.8(14) | 22.1(8)  | -6.6(9)  | 7.1(8)   | 10.3(11) |
| C10  | 42.7(11) | 57.7(13) | 35.5(10) | -20.9(9) | 2.2(8)   | 5.6(9)   |
| C11  | 39.3(10) | 39.3(10) | 41.8(10) | -14.2(8) | 7.9(8)   | -1.7(8)  |
| C12  | 35.9(9)  | 32.6(9)  | 29.0(8)  | -5.0(7)  | 7.2(7)   | 1.4(7)   |
| C13  | 34.3(9)  | 27.1(8)  | 26.8(8)  | -1.7(6)  | 7.2(7)   | 2.0(6)   |
| C14  | 21.3(7)  | 28.2(8)  | 20.7(7)  | -1.2(6)  | 7.2(6)   | 0.2(6)   |
| C15  | 34.7(9)  | 28.3(8)  | 24.6(7)  | 0.9(6)   | 9.6(7)   | 3.0(7)   |
| C16  | 34.9(9)  | 40.0(9)  | 21.6(7)  | 2.8(7)   | 7.1(7)   | 8.0(7)   |
| C17  | 26.5(8)  | 44.1(10) | 22.6(7)  | -7.0(7)  | 6.5(6)   | -0.4(7)  |
| C18  | 31.1(8)  | 31.8(8)  | 30.4(8)  | -7.1(7)  | 13.0(7)  | -5.3(7)  |
| C19  | 26.8(8)  | 29.7(8)  | 23.3(7)  | -0.2(6)  | 9.3(6)   | 0.4(6)   |
| C20  | 27.3(8)  | 28.6(8)  | 21.3(7)  | 3.1(6)   | 8.6(6)   | 0.9(6)   |
| C21  | 25.7(8)  | 51.8(11) | 31.1(8)  | 2.2(8)   | 11.4(7)  | 5.1(8)   |
| C22  | 26.4(8)  | 24.4(7)  | 20.4(7)  | -2.2(6)  | 9.4(6)   | 0.5(6)   |
| C23  | 29.6(8)  | 31.0(8)  | 20.7(7)  | 0.9(6)   | 6.4(6)   | 0.6(6)   |
| C24  | 39.0(9)  | 29.6(8)  | 23.8(7)  | 2.6(6)   | 11.6(7)  | -1.5(7)  |
| C25  | 33.9(8)  | 27.6(8)  | 26.3(7)  | -4.5(6)  | 16.4(7)  | -5.4(6)  |
| C26  | 26.8(8)  | 28.5(8)  | 24.5(7)  | -3.1(6)  | 8.2(6)   | 0.0(6)   |
| C27  | 29.0(8)  | 26.1(7)  | 22.0(7)  | 1.0(6)   | 7.8(6)   | 0.7(6)   |

**Table S7:** Bond Lengths in Å for **6j**.

| Atom | Atom | Length/Å   | Atom | Atom | Length/Å |
|------|------|------------|------|------|----------|
| F1   | C13  | 1.3362(18) | C5   | C13  | 1.518(2) |
| F2   | C13  | 1.3360(18) | C6   | C7   | 1.512(2) |
| F3   | C13  | 1.335(2)   | C7   | C8   | 1.393(2) |
| O1   | C1   | 1.4140(17) | C7   | C12  | 1.387(2) |
| O1   | C5   | 1.4294(17) | C8   | C9   | 1.389(3) |
| O2   | C20  | 1.2102(18) | C9   | C10  | 1.377(3) |
| O3   | C20  | 1.3346(18) | C10  | C11  | 1.373(3) |
| O3   | C21  | 1.4435(19) | C11  | C12  | 1.391(2) |
| O4   | N2   | 1.2203(19) | C14  | C15  | 1.392(2) |
| O5   | N2   | 1.228(2)   | C14  | C19  | 1.389(2) |
| N1   | C4   | 1.478(2)   | C15  | C16  | 1.388(2) |
| N1   | C5   | 1.4384(18) | C16  | C17  | 1.387(2) |
| N1   | C6   | 1.4724(19) | C17  | C18  | 1.385(2) |
| N2   | C25  | 1.466(2)   | C18  | C19  | 1.393(2) |
| C1   | C2   | 1.514(2)   | C22  | C23  | 1.398(2) |
| C1   | C3   | 1.496(2)   | C22  | C27  | 1.398(2) |
| C1   | C4   | 1.515(2)   | C23  | C24  | 1.380(2) |
| C2   | C3   | 1.567(2)   | C24  | C25  | 1.375(2) |
| C2   | C14  | 1.5004(19) | C25  | C26  | 1.385(2) |
| C2   | C20  | 1.499(2)   | C26  | C27  | 1.383(2) |
| C3   | C22  | 1.483(2)   |      |      |          |

**Table S8:** Bond Angles in ° for **6j**.

| Atom | Atom | Atom | Angle/°    | Atom | Atom | Atom | Angle/°    |
|------|------|------|------------|------|------|------|------------|
| C1   | O1   | C5   | 107.35(11) | C10  | C9   | C8   | 120.61(18) |
| C20  | O3   | C21  | 116.01(12) | C11  | C10  | C9   | 119.53(18) |
| C5   | N1   | C4   | 104.40(11) | C10  | C11  | C12  | 120.38(19) |
| C5   | N1   | C6   | 114.05(12) | C7   | C12  | C11  | 120.71(17) |
| C6   | N1   | C4   | 112.64(12) | F1   | C13  | C5   | 111.39(13) |
| O4   | N2   | O5   | 122.98(15) | F2   | C13  | F1   | 107.10(13) |
| O4   | N2   | C25  | 119.03(14) | F2   | C13  | C5   | 110.72(13) |
| O5   | N2   | C25  | 117.97(15) | F3   | C13  | F1   | 106.91(13) |
| O1   | C1   | C2   | 114.90(12) | F3   | C13  | F2   | 107.33(14) |
| O1   | C1   | C3   | 117.65(12) | F3   | C13  | C5   | 113.09(13) |
| O1   | C1   | C4   | 106.42(12) | C15  | C14  | C2   | 120.00(14) |
| C2   | C1   | C4   | 127.32(13) | C19  | C14  | C2   | 120.52(13) |
| C3   | C1   | C2   | 62.74(10)  | C19  | C14  | C15  | 119.30(14) |
| C3   | C1   | C4   | 122.94(12) | C16  | C15  | C14  | 120.29(15) |
| C1   | C2   | C3   | 58.06(9)   | C17  | C16  | C15  | 120.17(15) |
| C14  | C2   | C1   | 120.00(13) | C18  | C17  | C16  | 119.87(15) |
| C14  | C2   | C3   | 121.60(12) | C17  | C18  | C19  | 119.97(15) |
| C20  | C2   | C1   | 115.95(12) | C14  | C19  | C18  | 120.37(15) |
| C20  | C2   | C3   | 111.63(12) | O2   | C20  | O3   | 123.50(14) |
| C20  | C2   | C14  | 116.65(12) | O2   | C20  | C2   | 124.43(14) |
| C1   | C3   | C2   | 59.19(9)   | O3   | C20  | C2   | 112.03(12) |
| C22  | C3   | C1   | 125.99(13) | C23  | C22  | C3   | 115.99(13) |
| C22  | C3   | C2   | 125.09(12) | C27  | C22  | C3   | 125.53(13) |
| N1   | C4   | C1   | 102.52(12) | C27  | C22  | C23  | 118.48(14) |
| O1   | C5   | N1   | 109.58(12) | C24  | C23  | C22  | 121.61(15) |
| O1   | C5   | C13  | 106.91(12) | C25  | C24  | C23  | 118.24(14) |
| N1   | C5   | C13  | 111.17(13) | C24  | C25  | N2   | 118.99(14) |
| N1   | C6   | C7   | 112.07(13) | C24  | C25  | C26  | 122.21(15) |
| C8   | C7   | C6   | 119.72(16) | C26  | C25  | N2   | 118.78(15) |
| C12  | C7   | C6   | 121.77(14) | C27  | C26  | C25  | 119.00(15) |
| C12  | C7   | C8   | 118.47(16) | C26  | C27  | C22  | 120.46(14) |
| C9   | C8   | C7   | 120.29(19) |      |      |      |            |

**Table S9:** Torsion Angles in ° for **6j**.

| Atom | Atom | Atom | Atom | Angle/°     |
|------|------|------|------|-------------|
| O1   | C1   | C2   | C3   | 109.66(14)  |
| O1   | C1   | C2   | C14  | -1.0(2)     |
| O1   | C1   | C2   | C20  | -149.99(13) |
| O1   | C1   | C3   | C2   | -105.36(14) |
| O1   | C1   | C3   | C22  | 7.9(2)      |
| O1   | C1   | C4   | N1   | -28.90(14)  |
| O1   | C5   | C13  | F1   | -55.05(17)  |
| O1   | C5   | C13  | F2   | -174.11(12) |
| O1   | C5   | C13  | F3   | 65.39(16)   |
| O4   | N2   | C25  | C24  | -179.80(15) |
| O4   | N2   | C25  | C26  | 2.0(2)      |
| O5   | N2   | C25  | C24  | 1.5(2)      |
| O5   | N2   | C25  | C26  | -176.69(17) |
| N1   | C5   | C13  | F1   | -174.61(12) |
| N1   | C5   | C13  | F2   | 66.32(17)   |
| N1   | C5   | C13  | F3   | -54.17(17)  |
| N1   | C6   | C7   | C8   | 165.67(15)  |
| N1   | C6   | C7   | C12  | -16.8(2)    |
| N2   | C25  | C26  | C27  | 177.20(14)  |
| C1   | O1   | C5   | N1   | 3.42(15)    |
| C1   | O1   | C5   | C13  | -117.16(13) |
| C1   | C2   | C3   | C22  | -114.67(16) |

| Atom | Atom | Atom | Atom | Angle/°     |
|------|------|------|------|-------------|
| C1   | C2   | C14  | C15  | -58.1(2)    |
| C1   | C2   | C14  | C19  | 126.85(16)  |
| C1   | C2   | C20  | O2   | -28.6(2)    |
| C1   | C2   | C20  | O3   | 153.27(13)  |
| C1   | C3   | C22  | C23  | 152.89(14)  |
| C1   | C3   | C22  | C27  | -26.0(2)    |
| C2   | C1   | C3   | C22  | 113.21(16)  |
| C2   | C1   | C4   | N1   | -169.86(13) |
| C2   | C3   | C22  | C23  | -132.38(15) |
| C2   | C3   | C22  | C27  | 48.7(2)     |
| C2   | C14  | C15  | C16  | -174.02(15) |
| C2   | C14  | C19  | C18  | 173.99(14)  |
| C3   | C1   | C2   | C14  | -110.67(15) |
| C3   | C1   | C2   | C20  | 100.35(14)  |
| C3   | C1   | C4   | N1   | 111.22(15)  |
| C3   | C2   | C14  | C15  | -126.90(15) |
| C3   | C2   | C14  | C19  | 58.1(2)     |
| C3   | C2   | C20  | O2   | 35.3(2)     |
| C3   | C2   | C20  | O3   | -142.82(13) |
| C3   | C22  | C23  | C24  | -179.60(14) |
| C3   | C22  | C27  | C26  | 178.67(14)  |
| C4   | N1   | C5   | O1   | -21.86(15)  |
| C4   | N1   | C5   | C13  | 96.09(14)   |
| C4   | N1   | C6   | C7   | -80.59(16)  |
| C4   | C1   | C2   | C3   | -112.11(17) |
| C4   | C1   | C2   | C14  | 137.22(15)  |
| C4   | C1   | C2   | C20  | -11.8(2)    |
| C4   | C1   | C3   | C2   | 118.61(16)  |
| C4   | C1   | C3   | C22  | -128.17(16) |
| C5   | O1   | C1   | C2   | 162.63(12)  |
| C5   | O1   | C1   | C3   | -126.45(13) |
| C5   | O1   | C1   | C4   | 16.15(15)   |
| C5   | N1   | C4   | C1   | 30.16(14)   |
| C5   | N1   | C6   | C7   | 160.65(13)  |
| C6   | N1   | C4   | C1   | -94.10(14)  |
| C6   | N1   | C5   | O1   | 101.49(14)  |
| C6   | N1   | C5   | C13  | -140.56(13) |
| C6   | C7   | C8   | C9   | 176.84(17)  |
| C6   | C7   | C12  | C11  | -177.71(16) |
| C7   | C8   | C9   | C10  | 1.1(3)      |
| C8   | C7   | C12  | C11  | -0.2(3)     |
| C8   | C9   | C10  | C11  | -0.5(3)     |
| C9   | C10  | C11  | C12  | -0.4(3)     |
| C10  | C11  | C12  | C7   | 0.7(3)      |
| C12  | C7   | C8   | C9   | -0.8(3)     |
| C14  | C2   | C3   | C1   | 107.95(15)  |
| C14  | C2   | C3   | C22  | -6.7(2)     |
| C14  | C2   | C20  | O2   | -178.61(15) |
| C14  | C2   | C20  | O3   | 3.23(19)    |
| C14  | C15  | C16  | C17  | 0.2(2)      |
| C15  | C14  | C19  | C18  | -1.1(2)     |
| C15  | C16  | C17  | C18  | -1.4(3)     |
| C16  | C17  | C18  | C19  | 1.4(2)      |
| C17  | C18  | C19  | C14  | -0.2(2)     |
| C19  | C14  | C15  | C16  | 1.1(2)      |
| C20  | C2   | C3   | C1   | -107.91(14) |
| C20  | C2   | C3   | C22  | 137.42(15)  |
| C20  | C2   | C14  | C15  | 90.64(18)   |
| C20  | C2   | C14  | C19  | -84.38(18)  |
| C21  | O3   | C20  | O2   | -1.0(2)     |
| C21  | O3   | C20  | C2   | 177.14(13)  |
| C22  | C23  | C24  | C25  | 0.7(2)      |

| Atom | Atom | Atom | Atom | Angle/°     |
|------|------|------|------|-------------|
| C23  | C22  | C27  | C26  | -0.2(2)     |
| C23  | C24  | C25  | N2   | -178.00(14) |
| C23  | C24  | C25  | C26  | 0.1(2)      |
| C24  | C25  | C26  | C27  | -0.9(2)     |
| C25  | C26  | C27  | C22  | 1.0(2)      |
| C27  | C22  | C23  | C24  | -0.6(2)     |

**Table S10:** Hydrogen Fractional Atomic Coordinates ( $\times 10^4$ ) and Equivalent Isotropic Displacement Parameters ( $\text{\AA}^2 \times 10^3$ ) for **6j**.  $U_{eq}$  is defined as 1/3 of the trace of the orthogonalised  $U_{ij}$ .

| Atom | x       | y        | z       | $U_{eq}$ |
|------|---------|----------|---------|----------|
| H3   | 5664.7  | 3436.74  | 2888.75 | 29       |
| H4A  | 5537.78 | 165.02   | 3533.69 | 32       |
| H4B  | 5444.04 | 923.09   | 2819.3  | 32       |
| H5   | 7000.21 | 80.93    | 3586.44 | 30       |
| H6A  | 6610.09 | -350.37  | 2530.07 | 36       |
| H6B  | 6200.95 | 991.01   | 2397.13 | 36       |
| H8   | 5912.08 | 250.71   | 1171.71 | 50       |
| H9   | 5275.26 | -1052.08 | 302.17  | 61       |
| H10  | 4755.97 | -2867.41 | 542.63  | 58       |
| H11  | 4884.38 | -3411.1  | 1657.73 | 50       |
| H12  | 5537.11 | -2161.33 | 2534.92 | 40       |
| H15  | 6323.39 | 1768.1   | 5117.4  | 35       |
| H16  | 6815.06 | 2649.94  | 6192.78 | 39       |
| H17  | 6988.62 | 5076.2   | 6354.18 | 38       |
| H18  | 6703.34 | 6609.56  | 5430.06 | 37       |
| H19  | 6210.43 | 5728.8   | 4351.38 | 32       |
| H21A | 4323.61 | 4443.74  | 3731.76 | 54       |
| H21B | 4452.9  | 4535.46  | 4526.95 | 54       |
| H21C | 4331.13 | 3033.98  | 4153.95 | 54       |
| H23  | 5972.61 | 5234.83  | 2420.82 | 33       |
| H24  | 6653.97 | 6727.3   | 2280.68 | 37       |
| H26  | 7811.7  | 5019.83  | 3945.83 | 32       |
| H27  | 7123.14 | 3562.88  | 4100.18 | 31       |



# Methyl 4-(-2-phenyl-2,5-bis(trifluoromethyl)-4-oxa-6-azaspiro[2.4]heptan-1-yl)benzoate (**16b**)

CCDC deposition number: 2451793

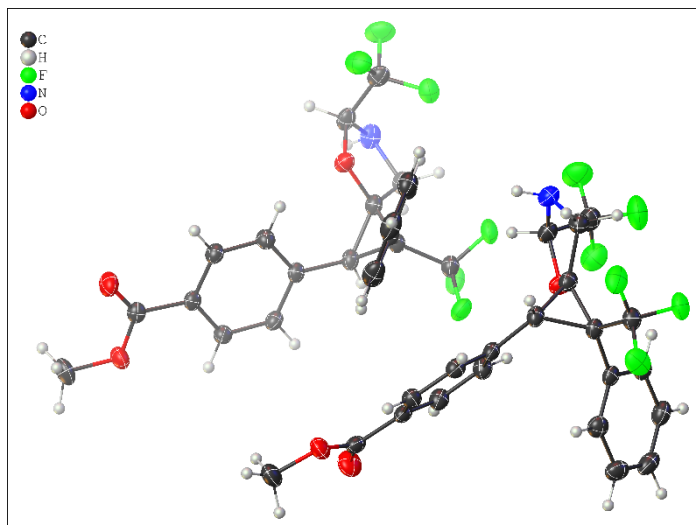

Crystals of compound **16b** were collected upon crystallization via slow evaporation with pentane in toluene.

**Experimental.** Single colourless plate-shaped crystals of **16b** were used as supplied. A suitable crystal with dimensions  $0.25 \times 0.16 \times 0.06 \text{ mm}^3$  was selected and mounted on an XtaLAB Synergy R, DW system, HyPix-Arc 150 diffractometer. The crystal was kept at a steady  $T = 140.00(10) \text{ K}$  during data collection. The structure was solved with the ShelXT 2018/2 (Sheldrick, 2015) solution program using dual methods and by using Olex2 1.5 (Dolomanov et al., 2009) as the graphical interface. The model was refined with ShelXL 2019/3 (Sheldrick, 2015) using full matrix least squares minimisation on  $F^2$ .

**Crystal Data.**  $\text{C}_{21}\text{H}_{17}\text{NO}_3\text{F}_6$ ,  $M_r = 445.36$ , monoclinic,  $P2_1/c$  (No. 14),  $a = 14.77504(10) \text{ \AA}$ ,  $b = 24.62736(17) \text{ \AA}$ ,  $c = 11.15008(6) \text{ \AA}$ ,  $\beta = 90.3773(6)^\circ$ ,  $\alpha = \gamma = 90^\circ$ ,  $V = 4057.09(5) \text{ \AA}^3$ ,  $T = 140.00(10) \text{ K}$ ,  $Z = 8$ ,  $Z' = 2$ ,  $\mu(\text{Cu K}\alpha) = 1.178$ , 54330 reflections measured, 8257 unique ( $R_{\text{int}} = 0.0170$ ) which were used in all calculations. The final  $wR_2$  was 0.0786 (all data) and  $R_1$  was 0.0304 ( $I \geq 2\sigma(I)$ ).

| Compound                              | <b>16b</b>                                        |
|---------------------------------------|---------------------------------------------------|
| Formula                               | $\text{C}_{21}\text{H}_{17}\text{NO}_3\text{F}_6$ |
| $D_{\text{calc.}} / \text{g cm}^{-3}$ | 1.458                                             |
| $\mu / \text{mm}^{-1}$                | 1.178                                             |
| Formula Weight                        | 445.36                                            |
| Colour                                | colourless                                        |
| Shape                                 | plate-shaped                                      |
| Size/ $\text{mm}^3$                   | $0.25 \times 0.16 \times 0.06$                    |
| $T / \text{K}$                        | 140.00(10)                                        |
| Crystal System                        | monoclinic                                        |
| Space Group                           | $P2_1/c$                                          |
| $a / \text{\AA}$                      | 14.77504(10)                                      |
| $b / \text{\AA}$                      | 24.62736(17)                                      |
| $c / \text{\AA}$                      | 11.15008(6)                                       |
| $\alpha / ^\circ$                     | 90                                                |
| $\beta / ^\circ$                      | 90.3773(6)                                        |
| $\gamma / ^\circ$                     | 90                                                |
| $V / \text{\AA}^3$                    | 4057.09(5)                                        |
| $Z$                                   | 8                                                 |
| $Z'$                                  | 2                                                 |
| Wavelength/ $\text{\AA}$              | 1.54184                                           |
| Radiation type                        | $\text{CuK}\alpha$                                |
| $\theta_{\text{min}} / ^\circ$        | 2.991                                             |
| $\theta_{\text{max}} / ^\circ$        | 75.363                                            |
| Measured Refl's.                      | 54330                                             |
| Indep't Refl's                        | 8257                                              |
| Refl's $I \geq 2\sigma(I)$            | 7455                                              |
| $R_{\text{int}}$                      | 0.0170                                            |
| Parameters                            | 570                                               |
| Restraints                            | 0                                                 |
| Largest Peak/ $\text{e \AA}^{-3}$     | 0.290                                             |
| Deepest Hole/ $\text{e \AA}^{-3}$     | -0.200                                            |
| GooF                                  | 1.013                                             |
| $wR_2$ (all data)                     | 0.0786                                            |
| $wR_2$                                | 0.0768                                            |
| $R_1$ (all data)                      | 0.0336                                            |
| $R_1$                                 | 0.0304                                            |
| CCDC number                           | 2451793                                           |

## Structure Quality Indicators

|              |                                             |       |                 |      |                |       |                              |       |
|--------------|---------------------------------------------|-------|-----------------|------|----------------|-------|------------------------------|-------|
| Reflections: | d min (CuK $\alpha$ )<br>2 $\Theta$ =150.7° | 0.80  | I/ $\sigma$ (I) | 90.9 | Rint<br>m=6.71 | 1.70% | Full 135.4°<br>98% to 150.7° | 99.9  |
|              | Shift                                       | 0.001 | Max Peak        | 0.3  | Min Peak       | -0.2  | GooF                         | 1.013 |

A colourless plate-shaped crystal with dimensions  $0.25 \times 0.16 \times 0.06$  mm<sup>3</sup> was mounted. Data were collected using an XtaLAB Synergy R, DW system, HyPix-Arc 150 diffractometer operating at  $T = 140.00(10)$  K.

Data were measured using  $\omega$  scans with Cu K $\alpha$  radiation. The diffraction pattern was indexed and the total number of runs and images was based on the strategy calculation from the program CrysAlisPro system (CCD 43.143a 64-bit (release 25-10-2024)). The maximum resolution achieved was  $\Theta = 75.363^\circ$  (0.80 Å).

The unit cell was refined using CrysAlisPro 1.171.43.143a (Rigaku OD, 2024) on 37169 reflections, 68% of the observed reflections.

Data reduction, scaling and absorption corrections were performed using CrysAlisPro 1.171.43.143a (Rigaku OD, 2024). The final completeness is 99.90 % out to  $75.363^\circ$  in  $\Theta$ . A Gaussian absorption correction was performed using CrysAlisPro 1.171.43.143a (Rigaku Oxford Diffraction, 2024) Numerical absorption correction based on Gaussian integration over a multifaceted crystal model. Empirical absorption correction using spherical harmonics as implemented in SCALE3 ABSPACK scaling algorithm. The absorption coefficient  $\mu$  of this material is 1.178 mm<sup>-1</sup> at this wavelength ( $\lambda = 1.54184$  Å) and the minimum and maximum transmissions are 0.591 and 1.000.

The structure was solved in the space group  $P2_1/c$  (# 14) by the ShelXT 2018/2 (Sheldrick, 2015) structure solution program using dual methods and refined by full matrix least squares minimisation on  $F^2$  using version 2019/3 of ShelXL 2019/3 (Sheldrick, 2015). All non-hydrogen atoms were refined anisotropically. Hydrogen atom positions were calculated geometrically and refined using the riding model, but hydrogen atoms bound to nitrogen atoms were refined freely.

The value of Z' is 2. This means that there are two independent molecules in the asymmetric unit. The moiety formula is C<sub>21</sub> H<sub>17</sub> F<sub>6</sub> N O<sub>3</sub>.

## Citations

CrysAlis<sup>Pro</sup> Software System, Rigaku Oxford Diffraction, (2024).

O.V. Dolomanov and L.J. Bourhis and R.J. Gildea and J.A.K. Howard and H. Puschmann, Olex2: A complete structure solution, refinement and analysis program, *J. Appl. Cryst.*, (2009), **42**, 339-341.

Sheldrick, G.M., Crystal structure refinement with ShelXL, *Acta Cryst.*, (2015), **C71**, 3-8.

Sheldrick, G.M., ShelXT-Integrated space-group and crystal-structure determination, *Acta Cryst.*, (2015), **A71**, 3-8.

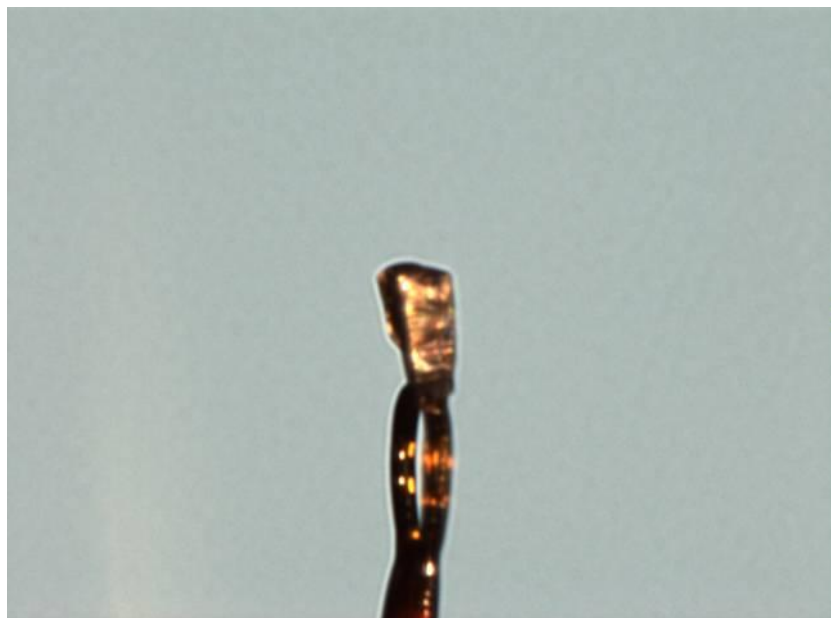

**Figure S6** Image of the **16b** Crystal on the Diffractometer.

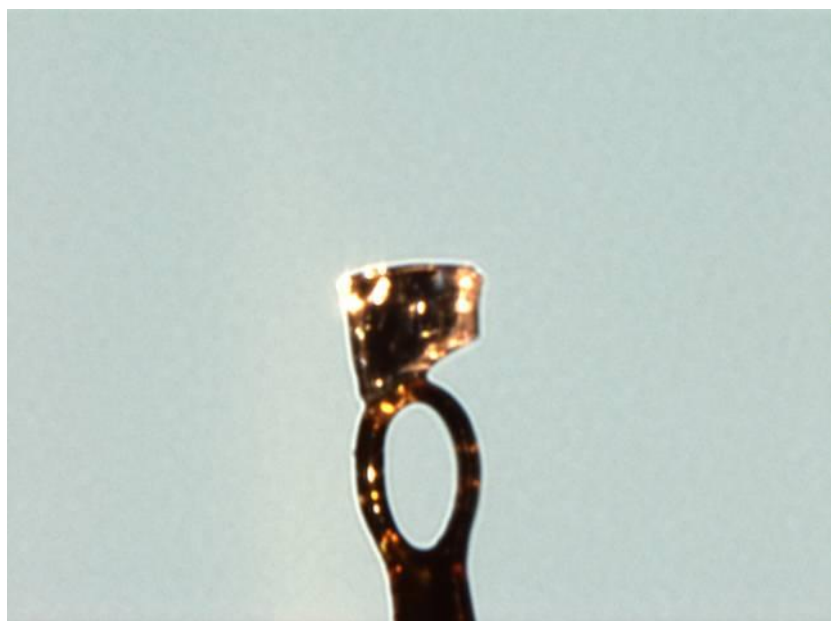

**Figure S7** Image of the **16b** Crystal on the Diffractometer.

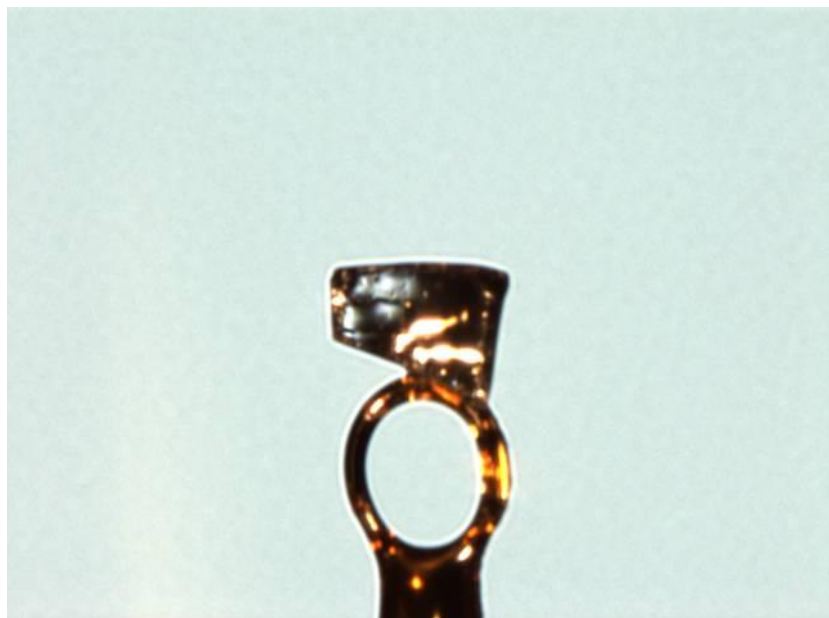

**Figure S8** Image of the **16b** Crystal on the Diffractometer.

## Data Plots: Diffraction Data

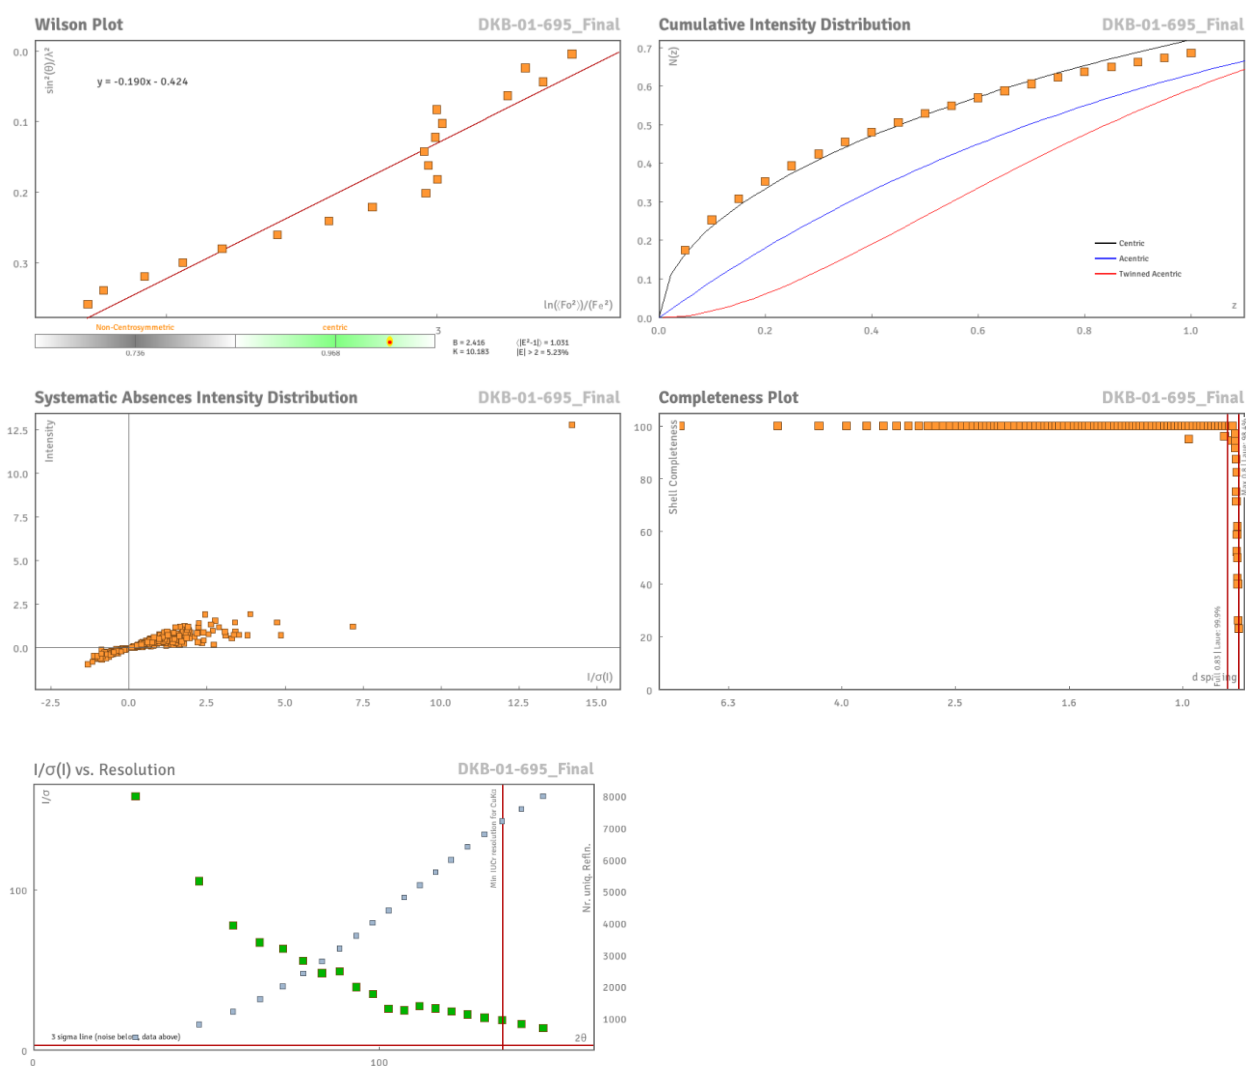

## Data Plots: Refinement and Data

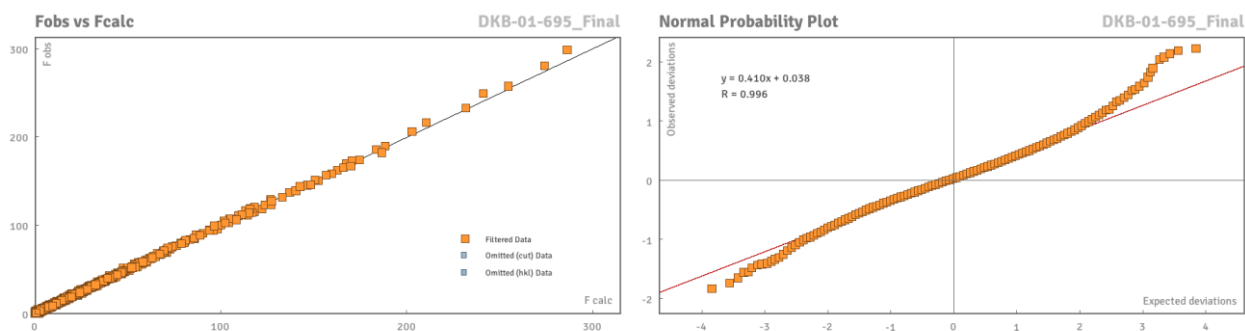

## Reflection Statistics

|                                     |                                                                                                  |                                |                 |
|-------------------------------------|--------------------------------------------------------------------------------------------------|--------------------------------|-----------------|
| Total reflections (after filtering) | 55378                                                                                            | Unique reflections             | 8257            |
| Completeness                        | 0.984                                                                                            | Mean I/ $\sigma$               | 46.44           |
| hkl <sub>max</sub> collected        | (18, 30, 12)                                                                                     | hkl <sub>min</sub> collected   | (-18, -30, -13) |
| hkl <sub>max</sub> used             | (18, 30, 13)                                                                                     | hkl <sub>min</sub> used        | (-18, 0, 0)     |
| Lim d <sub>max</sub> collected      | 100.0                                                                                            | Lim d <sub>min</sub> collected | 0.77            |
| d <sub>max</sub> used               | 24.63                                                                                            | d <sub>min</sub> used          | 0.8             |
| Friedel pairs                       | 6440                                                                                             | Friedel pairs merged           | 1               |
| Inconsistent equivalents            | 0                                                                                                | R <sub>int</sub>               | 0.017           |
| R <sub>sigma</sub>                  | 0.011                                                                                            | Intensity transformed          | 0               |
| Omitted reflections                 | 0                                                                                                | Omitted by user (OMIT hkl)     | 0               |
| Multiplicity                        | (8166, 6212, 3339, 1600, 828, 496, 282, 193, 161, 120, 110, 79, 47, 47, 35, 22, 22, 12, 7, 2, 1) | Maximum multiplicity           | 31              |
| Removed systematic absences         | 1048                                                                                             | Filtered off (Shel/OMIT)       | 0               |

**Table S11:** Fractional Atomic Coordinates ( $\times 10^4$ ) and Equivalent Isotropic Displacement Parameters ( $\text{\AA}^2 \times 10^3$ ) for **16b**.  $U_{eq}$  is defined as 1/3 of the trace of the orthogonalised  $U_{ij}$ .

| Atom | x          | y         | z          | $U_{eq}$  |
|------|------------|-----------|------------|-----------|
| F1   | 11289.2(6) | 5042.4(3) | 2852.2(8)  | 50.0(2)   |
| F2   | 9879.0(5)  | 4846.6(3) | 3015.5(6)  | 36.25(16) |
| F3   | 10670.3(6) | 4478.8(3) | 1620.0(6)  | 42.31(18) |
| F4   | 7802.8(5)  | 4187.1(3) | 4559.7(7)  | 37.29(17) |
| F5   | 8298.3(5)  | 3752.8(3) | 6104.8(6)  | 36.82(17) |
| F6   | 7326.4(5)  | 3379.2(3) | 4924.9(6)  | 36.48(17) |
| O1   | 10294.6(5) | 3750.9(3) | 3368.9(7)  | 27.66(17) |
| O2   | 11607.2(6) | 1094.9(4) | 2267.1(7)  | 36.1(2)   |
| O3   | 11233.2(6) | 755.6(3)  | 4058.7(7)  | 33.28(19) |
| N1   | 10886.9(7) | 4333.7(4) | 4830.1(9)  | 32.5(2)   |
| C1   | 9747.4(7)  | 3695.0(4) | 4396.8(9)  | 24.5(2)   |
| C2   | 8815.9(7)  | 3469.7(4) | 4180.5(9)  | 23.1(2)   |
| C3   | 9545.3(7)  | 3127.7(5) | 4834.4(9)  | 24.7(2)   |
| C4   | 10942.2(7) | 4171.7(5) | 3599.6(11) | 29.8(2)   |
| C5   | 9979.2(8)  | 4171.0(5) | 5220.0(10) | 29.4(2)   |
| C6   | 10693.3(8) | 4636.3(5) | 2767.2(11) | 32.5(3)   |
| C7   | 8066.6(8)  | 3694.3(5) | 4944.9(10) | 28.1(2)   |
| C8   | 8478.7(7)  | 3334.0(4) | 2943.8(9)  | 23.2(2)   |
| C9   | 8473.3(7)  | 3728.7(5) | 2048.7(10) | 26.5(2)   |
| C10  | 8068.3(8)  | 3621.6(5) | 945.2(11)  | 32.5(3)   |
| C11  | 7667.8(8)  | 3123.5(6) | 735.6(11)  | 36.1(3)   |
| C12  | 7677.9(8)  | 2727.4(5) | 1614.0(12) | 36.3(3)   |

| Atom | x           | y         | z          | $U_{eq}$  |
|------|-------------|-----------|------------|-----------|
| C13  | 8085.0(8)   | 2831.2(5) | 2717.6(11) | 29.8(2)   |
| C14  | 9945.7(7)   | 2618.4(4) | 4343.6(9)  | 23.2(2)   |
| C15  | 9943.7(7)   | 2162.0(5) | 5084.5(10) | 25.4(2)   |
| C16  | 10348.1(7)  | 1680.2(5) | 4741.5(10) | 26.0(2)   |
| C17  | 10759.5(7)  | 1642.1(4) | 3622.0(9)  | 23.2(2)   |
| C18  | 10742.7(7)  | 2090.3(5) | 2861.7(9)  | 25.8(2)   |
| C19  | 10347.7(8)  | 2574.0(5) | 3213.6(10) | 26.5(2)   |
| C20  | 11241.8(7)  | 1143.1(5) | 3225.7(10) | 25.3(2)   |
| C21  | 11721.7(10) | 263.5(5)  | 3783.9(13) | 39.9(3)   |
| F7   | 5865.3(6)   | 4572.6(4) | 4352.2(7)  | 47.0(2)   |
| F8   | 5234.9(6)   | 5039.2(4) | 2951.6(8)  | 55.9(2)   |
| F9   | 6686.6(6)   | 5034.4(4) | 3143.4(9)  | 55.7(2)   |
| F10  | 2717.2(5)   | 4271.7(3) | 1387.9(7)  | 38.36(17) |
| F11  | 3330.7(5)   | 3907.0(3) | -157.5(6)  | 42.31(19) |
| F12  | 2378.0(5)   | 3454.4(3) | 882.2(7)   | 43.12(19) |
| O4   | 5262.3(5)   | 3895.9(3) | 2647.9(7)  | 30.59(18) |
| O5   | 6432.8(7)   | 1198.3(4) | 3841.0(8)  | 41.7(2)   |
| O6   | 6261.7(6)   | 899.8(3)  | 1958.7(8)  | 33.22(19) |
| N2   | 5959.2(7)   | 4400.0(5) | 1135.1(10) | 34.9(2)   |
| C22  | 4743.6(7)   | 3830.8(5) | 1589.2(10) | 26.7(2)   |
| C23  | 3813.0(7)   | 3598.0(5) | 1765.7(10) | 25.1(2)   |
| C24  | 4558.1(7)   | 3262.9(5) | 1136.4(10) | 26.2(2)   |
| C25  | 6016.7(8)   | 4240.8(5) | 2373.1(11) | 31.4(3)   |
| C26  | 5013.6(8)   | 4298.4(5) | 776.9(11)  | 32.5(3)   |
| C27  | 5946.7(9)   | 4724.6(6) | 3211.2(12) | 38.5(3)   |
| C28  | 3065.4(8)   | 3805.4(5) | 966.8(11)  | 29.8(2)   |
| C29  | 3473.0(7)   | 3448.9(5) | 2989.5(10) | 25.3(2)   |
| C30  | 3500.2(8)   | 3825.6(5) | 3922.8(10) | 28.6(2)   |
| C31  | 3117.2(8)   | 3700.9(5) | 5026.8(11) | 33.7(3)   |
| C32  | 2707.4(8)   | 3204.0(6) | 5198.7(11) | 36.9(3)   |
| C33  | 2679.0(8)   | 2826.1(6) | 4280.5(12) | 37.1(3)   |
| C34  | 3064.6(8)   | 2948.4(5) | 3179.2(11) | 31.2(2)   |
| C35  | 4941.2(7)   | 2751.1(5) | 1636.3(9)  | 24.6(2)   |
| C36  | 4923.3(7)   | 2291.6(5) | 905.2(10)  | 26.0(2)   |
| C37  | 5309.9(7)   | 1805.6(5) | 1265.4(10) | 26.7(2)   |
| C38  | 5711.5(7)   | 1768.7(5) | 2397.7(10) | 24.9(2)   |
| C39  | 5704.4(8)   | 2218.6(5) | 3150.8(10) | 28.4(2)   |
| C40  | 5331.3(8)   | 2706.3(5) | 2779.6(10) | 29.0(2)   |
| C41  | 6165.5(7)   | 1266.3(5) | 2823.9(10) | 27.1(2)   |
| C42  | 6742.2(9)   | 412.9(5)  | 2293.9(14) | 41.2(3)   |

**Table S12:** Anisotropic Displacement Parameters ( $\times 10^4$ ) for **16b**. The anisotropic displacement factor exponent takes the form:  $-2\pi^2[h^2a^{*2} \times U_{11} + \dots + 2hka^* \times b^* \times U_{12}]$

| Atom | $U_{11}$ | $U_{22}$ | $U_{33}$ | $U_{23}$ | $U_{13}$ | $U_{12}$ |
|------|----------|----------|----------|----------|----------|----------|
| F1   | 47.9(5)  | 42.7(4)  | 59.6(5)  | -5.0(4)  | 6.0(4)   | -22.9(4) |
| F2   | 34.8(4)  | 33.2(4)  | 40.7(4)  | -4.0(3)  | -2.4(3)  | 4.5(3)   |
| F3   | 55.1(5)  | 40.1(4)  | 31.9(4)  | -4.5(3)  | 7.6(3)   | -6.0(4)  |
| F4   | 38.8(4)  | 32.0(4)  | 41.1(4)  | 1.5(3)   | 5.1(3)   | 15.6(3)  |
| F5   | 37.0(4)  | 48.2(4)  | 25.3(3)  | -6.8(3)  | 3.8(3)   | 12.6(3)  |
| F6   | 25.7(3)  | 43.4(4)  | 40.5(4)  | -1.9(3)  | 8.8(3)   | 0.7(3)   |
| O1   | 27.2(4)  | 28.6(4)  | 27.3(4)  | -6.4(3)  | 3.7(3)   | -3.7(3)  |
| O2   | 43.2(5)  | 36.7(5)  | 28.5(4)  | -4.1(4)  | 6.7(4)   | 10.6(4)  |
| O3   | 42.8(5)  | 23.7(4)  | 33.4(4)  | -0.1(3)  | 4.3(4)   | 7.9(3)   |
| N1   | 25.6(5)  | 38.2(6)  | 33.5(5)  | -7.8(4)  | -6.3(4)  | 0.8(4)   |
| C1   | 23.3(5)  | 28.0(5)  | 22.2(5)  | -3.9(4)  | 0.0(4)   | 3.6(4)   |
| C2   | 22.6(5)  | 24.2(5)  | 22.5(5)  | -0.6(4)  | 0.4(4)   | 3.8(4)   |
| C3   | 25.3(5)  | 28.8(6)  | 20.1(5)  | -1.4(4)  | -0.4(4)  | 6.2(4)   |
| C4   | 20.1(5)  | 33.3(6)  | 35.9(6)  | -8.6(5)  | 0.1(4)   | -1.5(4)  |

| Atom | $U_{11}$ | $U_{22}$ | $U_{33}$ | $U_{23}$ | $U_{13}$ | $U_{12}$ |
|------|----------|----------|----------|----------|----------|----------|
| C5   | 28.5(6)  | 31.3(6)  | 28.5(6)  | -8.2(5)  | -1.5(4)  | 1.3(5)   |
| C6   | 29.5(6)  | 32.5(6)  | 35.6(6)  | -7.6(5)  | 3.5(5)   | -7.9(5)  |
| C7   | 26.7(5)  | 30.4(6)  | 27.4(6)  | -0.5(4)  | 1.5(4)   | 5.8(4)   |
| C8   | 18.3(5)  | 26.5(5)  | 24.8(5)  | -2.4(4)  | 1.4(4)   | 2.2(4)   |
| C9   | 24.3(5)  | 27.2(5)  | 28.0(5)  | -1.2(4)  | -1.0(4)  | 2.7(4)   |
| C10  | 29.3(6)  | 42.4(7)  | 25.8(6)  | 0.6(5)   | -1.5(5)  | 7.4(5)   |
| C11  | 25.3(6)  | 54.2(8)  | 28.8(6)  | -12.0(5) | -3.6(5)  | 2.7(5)   |
| C12  | 27.0(6)  | 40.5(7)  | 41.4(7)  | -14.0(6) | 2.7(5)   | -8.2(5)  |
| C13  | 26.7(5)  | 30.0(6)  | 32.9(6)  | -2.0(5)  | 4.4(5)   | -3.4(4)  |
| C14  | 20.8(5)  | 27.0(5)  | 21.9(5)  | -2.1(4)  | -2.1(4)  | 4.0(4)   |
| C15  | 23.4(5)  | 31.5(6)  | 21.3(5)  | 0.4(4)   | 3.3(4)   | 2.9(4)   |
| C16  | 26.7(5)  | 26.7(5)  | 24.4(5)  | 2.8(4)   | 1.1(4)   | 2.1(4)   |
| C17  | 20.0(5)  | 26.0(5)  | 23.5(5)  | -2.4(4)  | -1.7(4)  | 1.7(4)   |
| C18  | 26.7(5)  | 30.3(6)  | 20.3(5)  | -1.4(4)  | 2.1(4)   | 2.5(4)   |
| C19  | 30.5(6)  | 27.6(6)  | 21.3(5)  | 1.6(4)   | 0.3(4)   | 4.1(4)   |
| C20  | 23.4(5)  | 27.6(6)  | 24.8(5)  | -3.9(4)  | -3.2(4)  | 0.6(4)   |
| C21  | 49.6(8)  | 24.7(6)  | 45.2(7)  | -6.9(5)  | -3.6(6)  | 10.2(5)  |
| F7   | 44.7(4)  | 58.0(5)  | 38.2(4)  | -8.4(4)  | 1.3(3)   | -3.4(4)  |
| F8   | 56.0(5)  | 51.3(5)  | 60.3(5)  | -13.1(4) | -4.6(4)  | 22.6(4)  |
| F9   | 52.2(5)  | 49.2(5)  | 65.8(6)  | -10.3(4) | 5.8(4)   | -20.4(4) |
| F10  | 37.3(4)  | 35.2(4)  | 42.6(4)  | -3.1(3)  | -4.8(3)  | 15.0(3)  |
| F11  | 43.0(4)  | 56.7(5)  | 27.2(4)  | 6.7(3)   | -4.0(3)  | 17.3(4)  |
| F12  | 34.3(4)  | 43.3(4)  | 51.5(5)  | 1.1(4)   | -18.8(3) | -1.7(3)  |
| O4   | 25.0(4)  | 38.3(5)  | 28.4(4)  | 3.4(3)   | -1.7(3)  | -5.1(3)  |
| O5   | 49.0(5)  | 43.9(5)  | 32.1(5)  | 8.6(4)   | -6.3(4)  | 11.1(4)  |
| O6   | 35.6(4)  | 25.8(4)  | 38.2(5)  | 3.3(3)   | -1.8(4)  | 4.6(3)   |
| N2   | 31.7(5)  | 36.1(6)  | 37.0(6)  | 1.0(5)   | 9.2(4)   | -0.9(4)  |
| C22  | 23.6(5)  | 32.0(6)  | 24.7(5)  | 2.5(4)   | 0.8(4)   | 3.2(4)   |
| C23  | 22.7(5)  | 28.5(5)  | 24.2(5)  | -1.1(4)  | -0.6(4)  | 3.7(4)   |
| C24  | 26.2(5)  | 32.2(6)  | 20.2(5)  | 1.4(4)   | 1.0(4)   | 7.2(4)   |
| C25  | 22.5(5)  | 34.3(6)  | 37.6(6)  | 0.2(5)   | 3.9(5)   | -0.5(5)  |
| C26  | 32.8(6)  | 32.6(6)  | 32.2(6)  | 5.6(5)   | 4.3(5)   | 2.9(5)   |
| C27  | 30.3(6)  | 40.0(7)  | 45.3(7)  | -2.9(6)  | 1.3(5)   | 0.0(5)   |
| C28  | 27.7(6)  | 31.8(6)  | 30.0(6)  | -1.5(5)  | -2.9(5)  | 5.7(5)   |
| C29  | 18.4(5)  | 31.1(6)  | 26.3(5)  | -0.1(4)  | -0.1(4)  | 3.8(4)   |
| C30  | 24.5(5)  | 31.2(6)  | 30.0(6)  | -1.4(5)  | 0.5(4)   | 3.8(4)   |
| C31  | 29.3(6)  | 44.5(7)  | 27.4(6)  | -3.8(5)  | 1.6(5)   | 7.9(5)   |
| C32  | 26.1(6)  | 54.0(8)  | 30.8(6)  | 7.8(6)   | 5.3(5)   | 5.0(5)   |
| C33  | 26.7(6)  | 41.8(7)  | 42.9(7)  | 8.5(6)   | 1.1(5)   | -4.8(5)  |
| C34  | 25.6(5)  | 33.9(6)  | 34.0(6)  | -2.0(5)  | -2.1(5)  | -1.9(5)  |
| C35  | 20.4(5)  | 31.1(6)  | 22.4(5)  | 2.3(4)   | 3.2(4)   | 4.0(4)   |
| C36  | 23.1(5)  | 32.8(6)  | 22.0(5)  | 1.8(4)   | -1.7(4)  | 0.7(4)   |
| C37  | 25.3(5)  | 28.3(6)  | 26.5(5)  | -0.1(4)  | 0.1(4)   | -0.8(4)  |
| C38  | 19.5(5)  | 29.9(6)  | 25.4(5)  | 4.7(4)   | 3.0(4)   | 1.2(4)   |
| C39  | 27.6(5)  | 37.1(6)  | 20.6(5)  | 2.4(4)   | -1.3(4)  | 4.9(5)   |
| C40  | 31.7(6)  | 33.5(6)  | 21.7(5)  | -1.8(4)  | 0.1(4)   | 5.7(5)   |
| C41  | 21.2(5)  | 30.7(6)  | 29.4(6)  | 6.2(5)   | 2.7(4)   | -1.3(4)  |
| C42  | 37.9(7)  | 27.7(6)  | 58.0(8)  | 8.2(6)   | 0.1(6)   | 7.0(5)   |

**Table S13:** Bond Lengths in Å for **16b**.

| Atom | Atom | Length/Å   | Atom | Atom | Length/Å   |
|------|------|------------|------|------|------------|
| F1   | C6   | 1.3353(14) | O1   | C4   | 1.4325(13) |
| F2   | C6   | 1.3404(14) | O2   | C20  | 1.2064(14) |
| F3   | C6   | 1.3368(14) | O3   | C20  | 1.3318(14) |
| F4   | C7   | 1.3442(13) | O3   | C21  | 1.4444(14) |
| F5   | C7   | 1.3434(13) | N1   | C4   | 1.4318(15) |
| F6   | C7   | 1.3412(14) | N1   | C5   | 1.4683(15) |
| O1   | C1   | 1.4137(13) | C1   | C2   | 1.5019(15) |

| Atom | Atom | Length/Å   |
|------|------|------------|
| C1   | C3   | 1.5102(16) |
| C1   | C5   | 1.5264(15) |
| C2   | C3   | 1.5466(14) |
| C2   | C7   | 1.5068(15) |
| C2   | C8   | 1.5007(14) |
| C3   | C14  | 1.4923(14) |
| C4   | C6   | 1.5170(18) |
| C8   | C9   | 1.3930(16) |
| C8   | C13  | 1.3905(16) |
| C9   | C10  | 1.3899(16) |
| C10  | C11  | 1.3812(19) |
| C11  | C12  | 1.382(2)   |
| C12  | C13  | 1.3898(17) |
| C14  | C15  | 1.3950(15) |
| C14  | C19  | 1.4007(15) |
| C15  | C16  | 1.3835(15) |
| C16  | C17  | 1.3952(15) |
| C17  | C18  | 1.3920(15) |
| C17  | C20  | 1.4891(15) |
| C18  | C19  | 1.3844(15) |
| F7   | C27  | 1.3323(16) |
| F8   | C27  | 1.3364(15) |
| F9   | C27  | 1.3358(15) |
| F10  | C28  | 1.3443(13) |
| F11  | C28  | 1.3395(14) |
| F12  | C28  | 1.3365(14) |
| O4   | C22  | 1.4122(13) |

| Atom | Atom | Length/Å   |
|------|------|------------|
| O4   | C25  | 1.4360(14) |
| O5   | C41  | 1.2101(14) |
| O6   | C41  | 1.3294(14) |
| O6   | C42  | 1.4417(14) |
| N2   | C25  | 1.4370(16) |
| N2   | C26  | 1.4719(16) |
| C22  | C23  | 1.5038(15) |
| C22  | C24  | 1.5114(16) |
| C22  | C26  | 1.5200(16) |
| C23  | C24  | 1.5477(15) |
| C23  | C28  | 1.5039(15) |
| C23  | C29  | 1.5027(15) |
| C24  | C35  | 1.4886(15) |
| C25  | C27  | 1.5181(18) |
| C29  | C30  | 1.3944(16) |
| C29  | C34  | 1.3893(17) |
| C30  | C31  | 1.3925(17) |
| C31  | C32  | 1.3793(19) |
| C32  | C33  | 1.3840(19) |
| C33  | C34  | 1.3900(17) |
| C35  | C36  | 1.3948(16) |
| C35  | C40  | 1.3999(15) |
| C36  | C37  | 1.3844(16) |
| C37  | C38  | 1.3944(16) |
| C38  | C39  | 1.3905(16) |
| C38  | C41  | 1.4840(15) |
| C39  | C40  | 1.3838(16) |

**Table S14:** Bond Angles in ° for **16b**.

| Atom | Atom | Atom | Angle/°    |
|------|------|------|------------|
| C1   | O1   | C4   | 108.05(8)  |
| C20  | O3   | C21  | 116.50(9)  |
| C4   | N1   | C5   | 105.40(9)  |
| O1   | C1   | C2   | 115.73(9)  |
| O1   | C1   | C3   | 117.86(9)  |
| O1   | C1   | C5   | 106.59(9)  |
| C2   | C1   | C3   | 61.79(7)   |
| C2   | C1   | C5   | 125.60(9)  |
| C3   | C1   | C5   | 124.07(9)  |
| C1   | C2   | C3   | 59.37(7)   |
| C1   | C2   | C7   | 116.71(9)  |
| C7   | C2   | C3   | 116.45(9)  |
| C8   | C2   | C1   | 121.88(9)  |
| C8   | C2   | C3   | 122.55(9)  |
| C8   | C2   | C7   | 111.15(9)  |
| C1   | C3   | C2   | 58.84(7)   |
| C14  | C3   | C1   | 125.40(9)  |
| C14  | C3   | C2   | 124.16(9)  |
| O1   | C4   | C6   | 106.07(9)  |
| N1   | C4   | O1   | 109.36(9)  |
| N1   | C4   | C6   | 111.16(10) |
| N1   | C5   | C1   | 103.50(9)  |
| F1   | C6   | F2   | 106.75(10) |
| F1   | C6   | F3   | 107.32(10) |
| F1   | C6   | C4   | 111.37(10) |
| F2   | C6   | C4   | 112.29(10) |
| F3   | C6   | F2   | 107.01(10) |
| F3   | C6   | C4   | 111.79(10) |

| Atom | Atom | Atom | Angle/°    |
|------|------|------|------------|
| F4   | C7   | C2   | 111.30(9)  |
| F5   | C7   | F4   | 106.40(9)  |
| F5   | C7   | C2   | 113.61(9)  |
| F6   | C7   | F4   | 106.40(9)  |
| F6   | C7   | F5   | 106.30(9)  |
| F6   | C7   | C2   | 112.35(9)  |
| C9   | C8   | C2   | 120.22(10) |
| C13  | C8   | C2   | 120.06(10) |
| C13  | C8   | C9   | 119.40(10) |
| C10  | C9   | C8   | 120.15(11) |
| C11  | C10  | C9   | 119.99(12) |
| C10  | C11  | C12  | 120.28(11) |
| C11  | C12  | C13  | 120.01(12) |
| C12  | C13  | C8   | 120.17(11) |
| C15  | C14  | C3   | 117.23(9)  |
| C15  | C14  | C19  | 118.19(10) |
| C19  | C14  | C3   | 124.54(10) |
| C16  | C15  | C14  | 121.65(10) |
| C15  | C16  | C17  | 119.77(10) |
| C16  | C17  | C20  | 122.22(10) |
| C18  | C17  | C16  | 119.04(10) |
| C18  | C17  | C20  | 118.71(9)  |
| C19  | C18  | C17  | 121.04(10) |
| C18  | C19  | C14  | 120.28(10) |
| O2   | C20  | O3   | 123.62(10) |
| O2   | C20  | C17  | 124.18(10) |
| O3   | C20  | C17  | 112.19(9)  |
| C22  | O4   | C25  | 107.85(9)  |



| Atom | Atom | Atom | Angle/°    | Atom | Atom | Atom | Angle/°    |
|------|------|------|------------|------|------|------|------------|
| C41  | O6   | C42  | 115.56(10) | F10  | C28  | C23  | 111.38(9)  |
| C25  | N2   | C26  | 105.32(9)  | F11  | C28  | F10  | 106.39(10) |
| O4   | C22  | C23  | 115.18(9)  | F11  | C28  | C23  | 113.55(9)  |
| O4   | C22  | C24  | 118.73(9)  | F12  | C28  | F10  | 106.54(9)  |
| O4   | C22  | C26  | 105.60(9)  | F12  | C28  | F11  | 106.36(10) |
| C23  | C22  | C24  | 61.77(7)   | F12  | C28  | C23  | 112.15(10) |
| C23  | C22  | C26  | 127.63(10) | C30  | C29  | C23  | 120.46(10) |
| C24  | C22  | C26  | 123.35(10) | C34  | C29  | C23  | 120.21(10) |
| C22  | C23  | C24  | 59.36(7)   | C34  | C29  | C30  | 119.15(10) |
| C22  | C23  | C28  | 117.50(10) | C31  | C30  | C29  | 120.21(11) |
| C28  | C23  | C24  | 115.75(9)  | C32  | C31  | C30  | 119.99(12) |
| C29  | C23  | C22  | 121.56(9)  | C31  | C32  | C33  | 120.32(11) |
| C29  | C23  | C24  | 121.63(9)  | C32  | C33  | C34  | 119.82(12) |
| C29  | C23  | C28  | 111.85(9)  | C29  | C34  | C33  | 120.51(11) |
| C22  | C24  | C23  | 58.88(7)   | C36  | C35  | C24  | 117.54(9)  |
| C35  | C24  | C22  | 126.21(10) | C36  | C35  | C40  | 118.32(10) |
| C35  | C24  | C23  | 123.47(9)  | C40  | C35  | C24  | 124.12(10) |
| O4   | C25  | N2   | 108.98(10) | C37  | C36  | C35  | 121.71(10) |
| O4   | C25  | C27  | 106.06(9)  | C36  | C37  | C38  | 119.43(11) |
| N2   | C25  | C27  | 111.92(11) | C37  | C38  | C41  | 122.21(10) |
| N2   | C26  | C22  | 102.68(9)  | C39  | C38  | C37  | 119.34(10) |
| F7   | C27  | F8   | 107.10(11) | C39  | C38  | C41  | 118.44(10) |
| F7   | C27  | F9   | 107.07(11) | C40  | C39  | C38  | 121.04(10) |
| F7   | C27  | C25  | 111.98(11) | C39  | C40  | C35  | 120.10(11) |
| F8   | C27  | C25  | 112.23(11) | O5   | C41  | O6   | 123.39(11) |
| F9   | C27  | F8   | 107.44(11) | O5   | C41  | C38  | 124.02(11) |
| F9   | C27  | C25  | 110.75(11) | O6   | C41  | C38  | 112.58(9)  |

**Table S15:** Torsion Angles in ° for **16b**.

| Atom | Atom | Atom | Atom | Angle/°     |
|------|------|------|------|-------------|
| O1   | C1   | C2   | C3   | 109.28(10)  |
| O1   | C1   | C2   | C7   | -144.36(10) |
| O1   | C1   | C2   | C8   | -2.32(14)   |
| O1   | C1   | C3   | C2   | -105.88(10) |
| O1   | C1   | C3   | C14  | 6.16(15)    |
| O1   | C1   | C5   | N1   | -22.40(11)  |
| O1   | C4   | C6   | F1   | -176.19(9)  |
| O1   | C4   | C6   | F2   | 64.14(12)   |
| O1   | C4   | C6   | F3   | -56.14(12)  |
| N1   | C4   | C6   | F1   | 65.03(12)   |
| N1   | C4   | C6   | F2   | -54.64(12)  |
| N1   | C4   | C6   | F3   | -174.92(9)  |
| C1   | O1   | C4   | N1   | 7.70(12)    |
| C1   | O1   | C4   | C6   | -112.26(10) |
| C1   | C2   | C3   | C14  | -114.07(12) |
| C1   | C2   | C7   | F4   | 77.38(12)   |
| C1   | C2   | C7   | F5   | -42.70(14)  |
| C1   | C2   | C7   | F6   | -163.42(9)  |
| C1   | C2   | C8   | C9   | -56.26(14)  |
| C1   | C2   | C8   | C13  | 130.31(11)  |
| C1   | C3   | C14  | C15  | 158.17(10)  |
| C1   | C3   | C14  | C19  | -19.55(17)  |
| C2   | C1   | C3   | C14  | 112.04(11)  |
| C2   | C1   | C5   | N1   | -162.77(10) |
| C2   | C3   | C14  | C15  | -128.38(11) |
| C2   | C3   | C14  | C19  | 53.90(16)   |
| C2   | C8   | C9   | C10  | -172.75(10) |
| C2   | C8   | C13  | C12  | 172.50(10)  |

| Atom | Atom | Atom | Atom | Angle/°     |
|------|------|------|------|-------------|
| C3   | C1   | C2   | C7   | 106.36(10)  |
| C3   | C1   | C2   | C8   | -111.60(11) |
| C3   | C1   | C5   | N1   | 119.80(11)  |
| C3   | C2   | C7   | F4   | 144.63(10)  |
| C3   | C2   | C7   | F5   | 24.55(14)   |
| C3   | C2   | C7   | F6   | -96.17(11)  |
| C3   | C2   | C8   | C9   | -127.91(11) |
| C3   | C2   | C8   | C13  | 58.66(14)   |
| C3   | C14  | C15  | C16  | -175.98(10) |
| C3   | C14  | C19  | C18  | 176.66(10)  |
| C4   | O1   | C1   | C2   | 154.30(9)   |
| C4   | O1   | C1   | C3   | -135.51(10) |
| C4   | O1   | C1   | C5   | 9.44(11)    |
| C4   | N1   | C5   | C1   | 26.59(12)   |
| C5   | N1   | C4   | O1   | -22.13(13)  |
| C5   | N1   | C4   | C6   | 94.66(11)   |
| C5   | C1   | C2   | C3   | -113.44(12) |
| C5   | C1   | C2   | C7   | -7.08(16)   |
| C5   | C1   | C2   | C8   | 134.96(11)  |
| C5   | C1   | C3   | C2   | 115.76(12)  |
| C5   | C1   | C3   | C14  | -132.20(11) |
| C7   | C2   | C3   | C1   | -106.78(11) |
| C7   | C2   | C3   | C14  | 139.15(11)  |
| C7   | C2   | C8   | C9   | 87.64(12)   |
| C7   | C2   | C8   | C13  | -85.79(12)  |
| C8   | C2   | C3   | C1   | 110.50(11)  |
| C8   | C2   | C3   | C14  | -3.57(16)   |
| C8   | C2   | C7   | F4   | -68.57(12)  |
| C8   | C2   | C7   | F5   | 171.36(9)   |
| C8   | C2   | C7   | F6   | 50.64(12)   |
| C8   | C9   | C10  | C11  | 0.18(17)    |
| C9   | C8   | C13  | C12  | -0.98(16)   |
| C9   | C10  | C11  | C12  | -0.84(18)   |
| C10  | C11  | C12  | C13  | 0.58(18)    |
| C11  | C12  | C13  | C8   | 0.34(18)    |
| C13  | C8   | C9   | C10  | 0.73(16)    |
| C14  | C15  | C16  | C17  | -0.92(17)   |
| C15  | C14  | C19  | C18  | -1.04(16)   |
| C15  | C16  | C17  | C18  | -0.92(16)   |
| C15  | C16  | C17  | C20  | 177.14(10)  |
| C16  | C17  | C18  | C19  | 1.77(16)    |
| C16  | C17  | C20  | O2   | -179.83(11) |
| C16  | C17  | C20  | O3   | -0.53(15)   |
| C17  | C18  | C19  | C14  | -0.78(17)   |
| C18  | C17  | C20  | O2   | -1.76(16)   |
| C18  | C17  | C20  | O3   | 177.54(10)  |
| C19  | C14  | C15  | C16  | 1.89(16)    |
| C20  | C17  | C18  | C19  | -176.37(10) |
| C21  | O3   | C20  | O2   | 2.19(16)    |
| C21  | O3   | C20  | C17  | -177.11(10) |
| O4   | C22  | C23  | C24  | -110.51(11) |
| O4   | C22  | C23  | C28  | 144.37(10)  |
| O4   | C22  | C23  | C29  | 0.07(15)    |
| O4   | C22  | C24  | C23  | 104.86(11)  |
| O4   | C22  | C24  | C35  | -6.02(16)   |
| O4   | C22  | C26  | N2   | 29.98(11)   |
| O4   | C25  | C27  | F7   | 52.01(13)   |
| O4   | C25  | C27  | F8   | -68.48(13)  |
| O4   | C25  | C27  | F9   | 171.45(10)  |
| N2   | C25  | C27  | F7   | 170.75(10)  |
| N2   | C25  | C27  | F8   | 50.25(14)   |
| N2   | C25  | C27  | F9   | -69.82(14)  |

| Atom | Atom | Atom | Atom | Angle/°     |
|------|------|------|------|-------------|
| C22  | O4   | C25  | N2   | 1.00(12)    |
| C22  | O4   | C25  | C27  | 121.66(10)  |
| C22  | C23  | C24  | C35  | 115.34(12)  |
| C22  | C23  | C28  | F10  | -83.33(12)  |
| C22  | C23  | C28  | F11  | 36.75(14)   |
| C22  | C23  | C28  | F12  | 157.36(10)  |
| C22  | C23  | C29  | C30  | 52.89(15)   |
| C22  | C23  | C29  | C34  | -132.05(11) |
| C22  | C24  | C35  | C36  | -160.77(10) |
| C22  | C24  | C35  | C40  | 17.94(17)   |
| C23  | C22  | C24  | C35  | -110.88(12) |
| C23  | C22  | C26  | N2   | 170.60(11)  |
| C23  | C24  | C35  | C36  | 125.72(11)  |
| C23  | C24  | C35  | C40  | -55.57(16)  |
| C23  | C29  | C30  | C31  | 174.73(10)  |
| C23  | C29  | C34  | C33  | -174.43(10) |
| C24  | C22  | C23  | C28  | -105.12(11) |
| C24  | C22  | C23  | C29  | 110.58(11)  |
| C24  | C22  | C26  | N2   | -111.38(12) |
| C24  | C23  | C28  | F10  | -150.57(10) |
| C24  | C23  | C28  | F11  | -30.49(14)  |
| C24  | C23  | C28  | F12  | 90.12(12)   |
| C24  | C23  | C29  | C30  | 123.97(12)  |
| C24  | C23  | C29  | C34  | -60.96(14)  |
| C24  | C35  | C36  | C37  | 176.25(10)  |
| C24  | C35  | C40  | C39  | -177.33(10) |
| C25  | O4   | C22  | C23  | -165.67(9)  |
| C25  | O4   | C22  | C24  | 124.11(10)  |
| C25  | O4   | C22  | C26  | -19.40(11)  |
| C25  | N2   | C26  | C22  | -28.99(12)  |
| C26  | N2   | C25  | O4   | 18.41(13)   |
| C26  | N2   | C25  | C27  | -98.58(11)  |
| C26  | C22  | C23  | C24  | 111.96(13)  |
| C26  | C22  | C23  | C28  | 6.84(17)    |
| C26  | C22  | C23  | C29  | -137.46(12) |
| C26  | C22  | C24  | C23  | -118.44(12) |
| C26  | C22  | C24  | C35  | 130.68(12)  |
| C28  | C23  | C24  | C22  | 108.06(11)  |
| C28  | C23  | C24  | C35  | -136.59(11) |
| C28  | C23  | C29  | C30  | -93.22(12)  |
| C28  | C23  | C29  | C34  | 81.85(13)   |
| C29  | C23  | C24  | C22  | -110.47(11) |
| C29  | C23  | C24  | C35  | 4.88(16)    |
| C29  | C23  | C28  | F10  | 64.28(13)   |
| C29  | C23  | C28  | F11  | -175.64(10) |
| C29  | C23  | C28  | F12  | -55.03(13)  |
| C29  | C30  | C31  | C32  | -0.15(17)   |
| C30  | C29  | C34  | C33  | 0.70(17)    |
| C30  | C31  | C32  | C33  | 0.39(18)    |
| C31  | C32  | C33  | C34  | -0.08(19)   |
| C32  | C33  | C34  | C29  | -0.47(18)   |
| C34  | C29  | C30  | C31  | -0.38(16)   |
| C35  | C36  | C37  | C38  | 1.40(16)    |
| C36  | C35  | C40  | C39  | 1.38(17)    |
| C36  | C37  | C38  | C39  | 0.93(16)    |
| C36  | C37  | C38  | C41  | -177.86(10) |
| C37  | C38  | C39  | C40  | -2.08(17)   |
| C37  | C38  | C41  | O5   | -171.55(11) |
| C37  | C38  | C41  | O6   | 9.51(15)    |
| C38  | C39  | C40  | C35  | 0.91(18)    |
| C39  | C38  | C41  | O5   | 9.65(17)    |
| C39  | C38  | C41  | O6   | -169.28(10) |

| Atom | Atom | Atom | Atom | Angle/°    |
|------|------|------|------|------------|
| C40  | C35  | C36  | C37  | -2.54(16)  |
| C41  | C38  | C39  | C40  | 176.75(10) |
| C42  | O6   | C41  | O5   | -2.19(16)  |
| C42  | O6   | C41  | C38  | 176.75(10) |

**Table S16:** Hydrogen Fractional Atomic Coordinates ( $\times 10^4$ ) and Equivalent Isotropic Displacement Parameters ( $\text{\AA}^2 \times 10^3$ ) for **16b**.  $U_{eq}$  is defined as 1/3 of the trace of the orthogonalised  $U_{ij}$ .

| Atom | x         | y       | z        | $U_{eq}$ |
|------|-----------|---------|----------|----------|
| H1   | 11297(11) | 4173(6) | 5256(14) | 42(4)    |
| H3   | 9450.46   | 3111.1  | 5720.83  | 30       |
| H4   | 11566.17  | 4039.01 | 3418.5   | 36       |
| H5A  | 9540.75   | 4471.53 | 5115.61  | 35       |
| H5B  | 9984.88   | 4057.01 | 6071.5   | 35       |
| H9   | 8747.04   | 4071.75 | 2192.88  | 32       |
| H10  | 8066.88   | 3890.94 | 335.33   | 39       |
| H11  | 7384.32   | 3052.76 | -15.47   | 43       |
| H12  | 7406.56   | 2384.23 | 1463.35  | 44       |
| H13  | 8094.19   | 2557.98 | 3318.97  | 36       |
| H15  | 9657.51   | 2182.55 | 5843.62  | 30       |
| H16  | 10345.64  | 1376.42 | 5266.54  | 31       |
| H18  | 11006.57  | 2063.95 | 2089.24  | 31       |
| H19  | 10349.29  | 2877.08 | 2686.49  | 32       |
| H21A | 11550.89  | 137.62  | 2979.96  | 60       |
| H21B | 11571.94  | -16.86  | 4373.99  | 60       |
| H21C | 12373.76  | 335.81  | 3811.44  | 60       |
| H2   | 6298(11)  | 4192(7) | 690(15)  | 48(4)    |
| H24  | 4474.56   | 3248.38 | 246.21   | 31       |
| H25  | 6596.9    | 4042.55 | 2524.77  | 38       |
| H26A | 4969.43   | 4194.15 | -78.97   | 39       |
| H26B | 4630.85   | 4621.73 | 918.38   | 39       |
| H30  | 3780.93   | 4168.31 | 3805.04  | 34       |
| H31  | 3138.15   | 3958.02 | 5661.43  | 40       |
| H32  | 2443.26   | 3120.68 | 5951.1   | 44       |
| H33  | 2396.85   | 2484.12 | 4402.46  | 45       |
| H34  | 3048.76   | 2687.63 | 2551.53  | 37       |
| H36  | 4638.56   | 2312.63 | 140.27   | 31       |
| H37  | 5301.64   | 1500    | 745.57   | 32       |
| H39  | 5959.76   | 2190.78 | 3932.58  | 34       |
| H40  | 5339.96   | 3011.27 | 3301.39  | 35       |
| H42A | 6827.04   | 184.46  | 1583.74  | 62       |
| H42B | 6392.19   | 213     | 2892.96  | 62       |
| H42C | 7333.99   | 510.1   | 2632.88  | 62       |

# References

- (1) Sheldrick, G. M. SHELXT – Integrated Space-Group and Crystal-Structure Determination. *Acta Crystallogr. Sect. Found. Adv.* **2015**, *71* (1), 3–8. <https://doi.org/10.1107/S2053273314026370>.
- (2) Sheldrick, G. M. Crystal Structure Refinement with SHELXL. *Acta Crystallogr. Sect. C Struct. Chem.* **2015**, *71* (1), 3–8. <https://doi.org/10.1107/S2053229614024218>.
- (3) Zalesskiy, S. S.; Ananikov, V. P. Pd<sub>2</sub>(Dba)<sub>3</sub> as a Precursor of Soluble Metal Complexes and Nanoparticles: Determination of Palladium Active Species for Catalysis and Synthesis. *Organometallics* **2012**, *31* (6), 2302–2309. <https://doi.org/10.1021/om201217r>.
- (4) Muriel, B.; Waser, J. Azide Radical Initiated Ring Opening of Cyclopropenes Leading to Alkenyl Nitriles and Polycyclic Aromatic Compounds. *Angew. Chem. Int. Ed.* **2021**, *60* (8), 4075–4079. <https://doi.org/10.1002/anie.202013516>.
- (5) Biswas, S.; Bolm, C. Rhodium(II)-Catalyzed N–H Insertions of Carbenes under Mechanochemical Conditions. *Org. Lett.* **2024**, *26* (7), 1511–1516. <https://doi.org/10.1021/acs.orglett.4c00216>.
- (6) Ye, F.; Wang, C.; Zhang, Y.; Wang, J. Synthesis of Aryldiazoacetates through Palladium(0)-Catalyzed Deacylative Cross-Coupling of Aryl Iodides with Acyldiazoacetates. *Angew. Chem. Int. Ed.* **2014**, *53* (43), 11625–11628. <https://doi.org/10.1002/anie.201407653>.
- (7) Kidonakis, M.; Stratakis, M. Au Nanoparticle-Catalyzed Insertion of Carbenes from  $\alpha$ -Diazocarbonyl Compounds into Hydrosilanes. *Org. Lett.* **2018**, *20* (13), 4086–4089. <https://doi.org/10.1021/acs.orglett.8b01638>.
- (8) Smyrnov, V.; Muriel, B.; Waser, J. Synthesis of Quinolines via the Metal-Free Visible-Light-Mediated Radical Azidation of Cyclopropenes. *Org. Lett.* **2021**, *23* (14), 5435–5439. <https://doi.org/10.1021/acs.orglett.1c01775>.
- (9) Pisella, G.; Gagnebin, A.; Waser, J. Copper-Catalyzed Oxyvinilation of Diazo Compounds. *Org. Lett.* **2020**, *22* (10), 3884–3889. <https://doi.org/10.1021/acs.orglett.0c01150>.
- (10) Liu, Y.; De Nisi, A.; Cerveri, A.; Monari, M.; Bandini, M. Nickel-Catalyzed Synthesis of Stereochemically Defined Enamides via Bi- and Tricomponent Coupling Reaction. *Org. Lett.* **2017**, *19* (19), 5034–5037. <https://doi.org/10.1021/acs.orglett.7b02166>.
- (11) Robles-Machín, R.; Adrio, J.; Carretero, J. C. Gold-Catalyzed Synthesis of Alkylidene 2-Oxazolidinones and 1,3-Oxazin-2-Ones. *J. Org. Chem.* **2006**, *71* (13), 5023–5026. <https://doi.org/10.1021/jo060520y>.
- (12) Molander, G. A.; Shin, I. Suzuki–Miyaura Cross-Coupling Reactions of Potassium Boc-Protected Aminomethyltrifluoroborate with Aryl and Hetaryl Mesylates. *Org. Lett.* **2012**, *14* (12), 3138–3141. <https://doi.org/10.1021/ol301221p>.
- (13) Charlesworth, N. G.; Arunprasath, D.; Graham, M. A.; Argent, S. P.; Datsenko, O. P.; Mykhailiuk, P. K.; Denton, R. M. Modular Synthesis of Cyclic  $\beta$ -Difluoroamines. *Chem. Commun.* **2024**, *60* (60), 7701–7704. <https://doi.org/10.1039/D4CC00640B>.
- (14) Wang, H.-Y.; Qin, Y.; Li, H.; Roman, L. J.; Martísek, P.; Poulos, T. L.; Silverman, R. B. Potent and Selective Human Neuronal Nitric Oxide Synthase Inhibition by Optimization of the 2-Aminopyridine-Based Scaffold with a Pyridine Linker. *J. Med. Chem.* **2016**, *59* (10), 4913–4925. <https://doi.org/10.1021/acs.jmedchem.6b00273>.
- (15) Das, S.; Goswami, R. K. Total Synthesis of Marine Natural Products Separacenes A and B. *Org. Biomol. Chem.* **2017**, *15* (22), 4842–4850. <https://doi.org/10.1039/C7OB00345E>.
- (16) Gensch, T.; dos Passos Gomes, G.; Friederich, P.; Peters, E.; Gaudin, T.; Pollice, R.; Jorner, K.; Nigam, A.; Lindner-D’Addario, M.; Sigman, M. S.; Aspuru-Guzik, A. A

- Comprehensive Discovery Platform for Organophosphorus Ligands for Catalysis. *J. Am. Chem. Soc.* **2022**, *144* (3), 1205–1217. <https://doi.org/10.1021/jacs.1c09718>.
- (17) Pedregosa, F.; Varoquaux, G.; Gramfort, A.; Michel, V.; Thirion, B.; Grisel, O.; Blondel, M.; Prettenhofer, P.; Weiss, R.; Dubourg, V.; Vanderplas, J.; Passos, A.; Cournapeau, D.; Brucher, M.; Perrot, M.; Duchesnay, É. Scikit-Learn: Machine Learning in Python. *J. Mach. Learn. Res.* **2011**, *12* (85), 2825–2830.
- (18) Schoepfer, A. A.; Laplaza, R.; Wodrich, M. D.; Waser, J.; Corminboeuf, C. Reaction-Agnostic Featurization of Bidentate Ligands for Bayesian Ridge Regression of Enantioselectivity. *ACS Catal.* **2024**, *14* (12), 9302–9312. <https://doi.org/10.1021/acscatal.4c02452>.
- (19) O’Boyle, N. M.; Banck, M.; James, C. A.; Morley, C.; Vandermeersch, T.; Hutchison, G. R. Open Babel: An Open Chemical Toolbox. *J. Cheminformatics* **2011**, *3* (1), 33. <https://doi.org/10.1186/1758-2946-3-33>.
- (20) Pracht, P.; Grimme, S.; Bannwarth, C.; Bohle, F.; Ehlert, S.; Feldmann, G.; Gorges, J.; Müller, M.; Neudecker, T.; Plett, C.; Spicher, S.; Steinbach, P.; Wesolowski, P. A.; Zeller, F. CREST—A Program for the Exploration of Low-Energy Molecular Chemical Space. *J. Chem. Phys.* **2024**, *160* (11), 114110. <https://doi.org/10.1063/5.0197592>.
- (21) Bannwarth, C.; Ehlert, S.; Grimme, S. GFN2-xTB—An Accurate and Broadly Parametrized Self-Consistent Tight-Binding Quantum Chemical Method with Multipole Electrostatics and Density-Dependent Dispersion Contributions. *J. Chem. Theory Comput.* **2019**, *15* (3), 1652–1671. <https://doi.org/10.1021/acs.jctc.8b01176>.
- (22) Frisch, M. J.; Trucks, G. W.; Schlegel, H. B.; Scuseria, G. E.; Robb, M. A.; Cheeseman, J. R.; Scalmani, G.; Barone, V.; Petersson, G. A.; Nakatsuji, H.; Li, X.; Caricato, M.; Marenich, A. V.; Bloino, J.; Janesko, B. G.; Gomperts, R.; Mennucci, B.; Hratchian, H. P.; Ortiz, J. V.; Izmaylov, A. F.; Sonnenberg, J. L.; Williams, D. J.; Ding, F.; Lipparini, F.; Egidi, F.; Goings, J.; Peng, B.; Petrone, A.; Henderson, T.; Ranasinghe, D.; Zakrzewski, V. G.; Gao, J.; Rega, N.; Zheng, G.; Liang, W.; Hada, M.; Ehara, M.; Toyota, K.; Fukuda, R.; Hasegawa, J.; Ishida, M.; Nakajima, T.; Honda, Y.; Kitao, O.; Nakai, H.; Vreven, T.; Throssell, K.; Montgomery Jr., J. A.; Peralta, J. E.; Ogliaro, F.; Bearpark, M. J.; Heyd, J. J.; Brothers, E. N.; Kudin, K. N.; Staroverov, V. N.; Keith, T. A.; Kobayashi, R.; Normand, J.; Raghavachari, K.; Rendell, A. P.; Burant, J. C.; Iyengar, S. S.; Tomasi, J.; Cossi, M.; Millam, J. M.; Klene, M.; Adamo, C.; Cammi, R.; Ochterski, J. W.; Martin, R. L.; Morokuma, K.; Farkas, O.; Foresman, J. B.; Fox, D. J. Gaussian 16 Rev. C.01, 2016.
- (23) Chai, J.-D.; Head-Gordon, M. Systematic Optimization of Long-Range Corrected Hybrid Density Functionals. *J. Chem. Phys.* **2008**, *128* (8), 084106. <https://doi.org/10.1063/1.2834918>.
- (24) Weigend, F.; Ahlrichs, R. Balanced Basis Sets of Split Valence, Triple Zeta Valence and Quadruple Zeta Valence Quality for H to Rn: Design and Assessment of Accuracy. *Phys. Chem. Chem. Phys.* **2005**, *7* (18), 3297–3305. <https://doi.org/10.1039/B508541A>.
- (25) Weigend, F. Accurate Coulomb-Fitting Basis Sets for H to Rn. *Phys. Chem. Chem. Phys.* **2006**, *8* (9), 1057–1065. <https://doi.org/10.1039/B515623H>.

## Copies of NMR Spectra

### Cyclopropenes

**<sup>1</sup>H NMR Spectrum of 3a (400 MHz, CDCl<sub>3</sub>)**

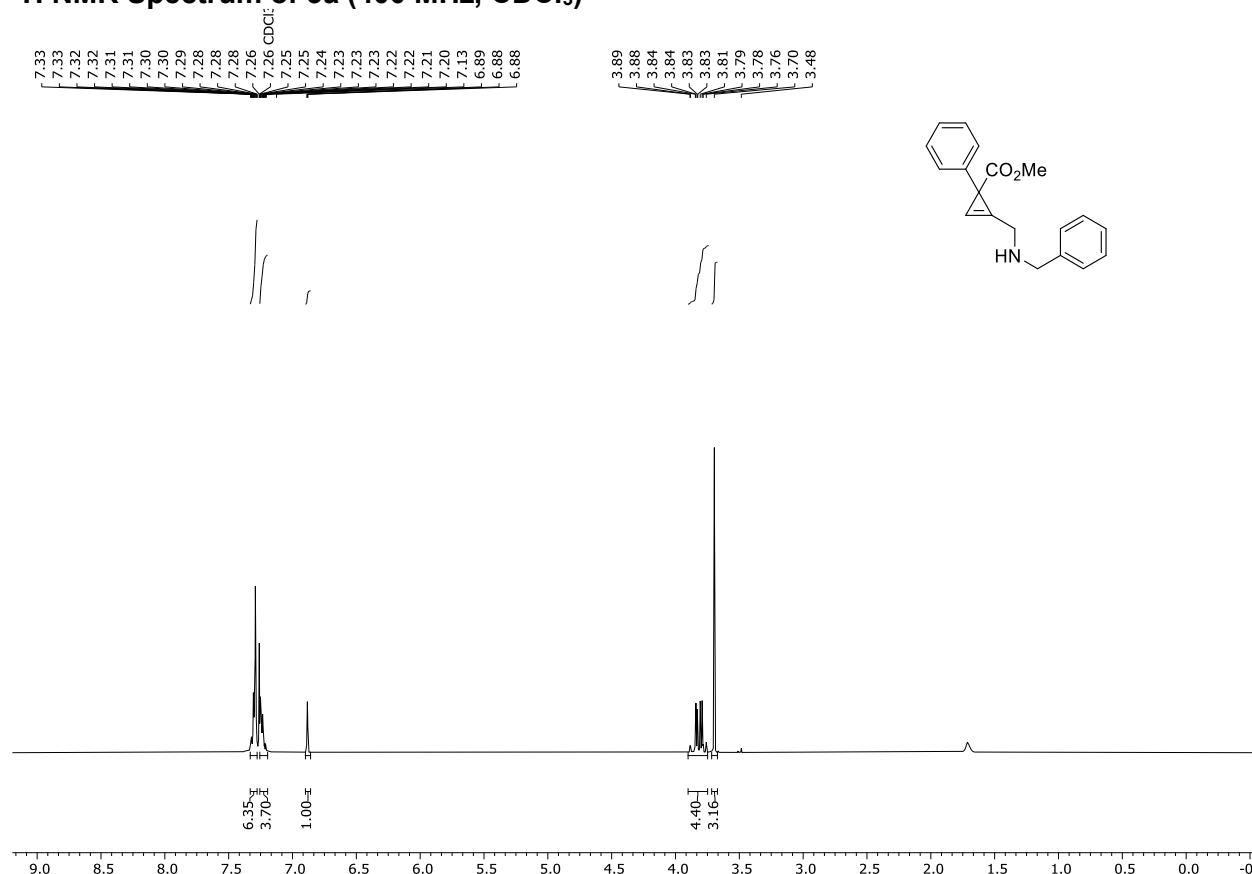

**<sup>13</sup>C NMR Spectrum of 3a (101 MHz, CDCl<sub>3</sub>)**

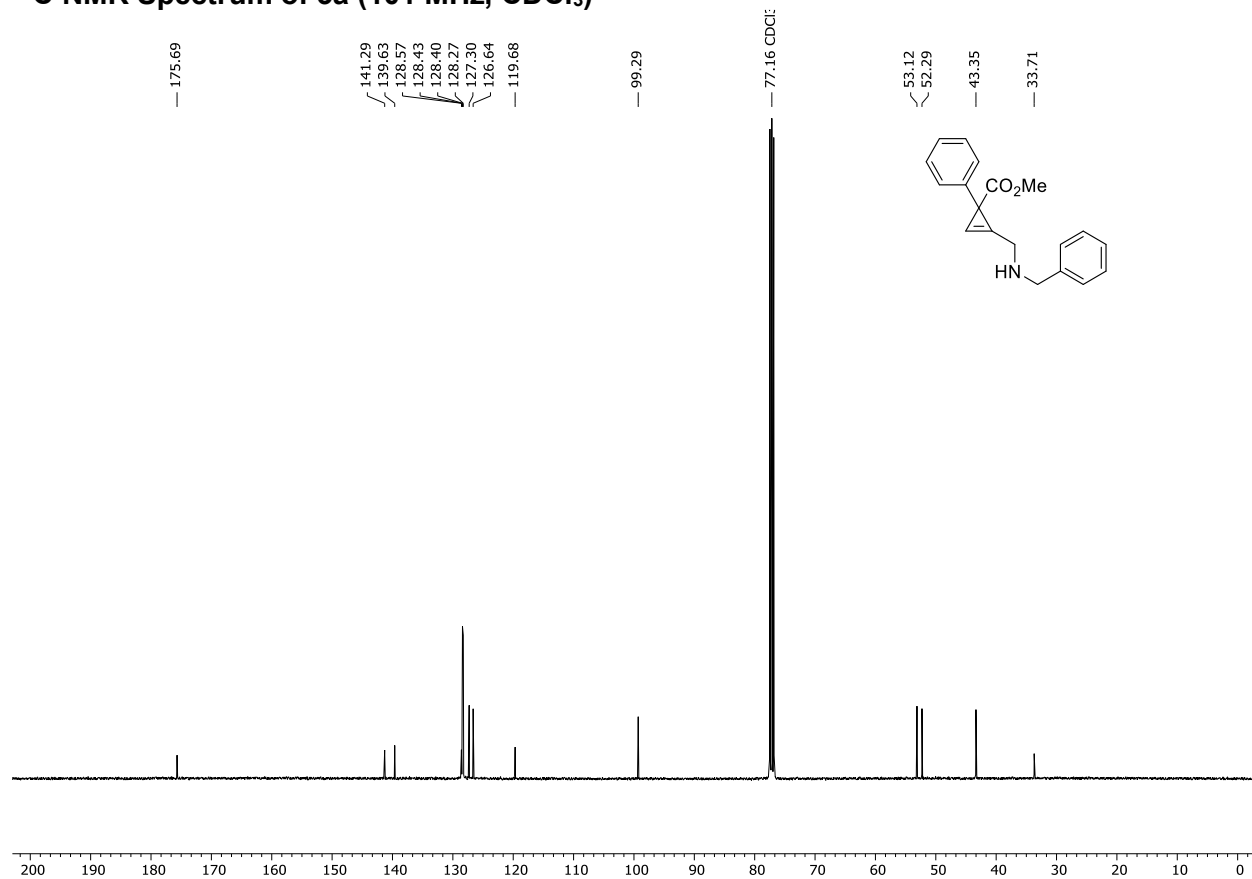

**<sup>1</sup>H NMR Spectrum of 3b (400 MHz, CDCl<sub>3</sub>)**

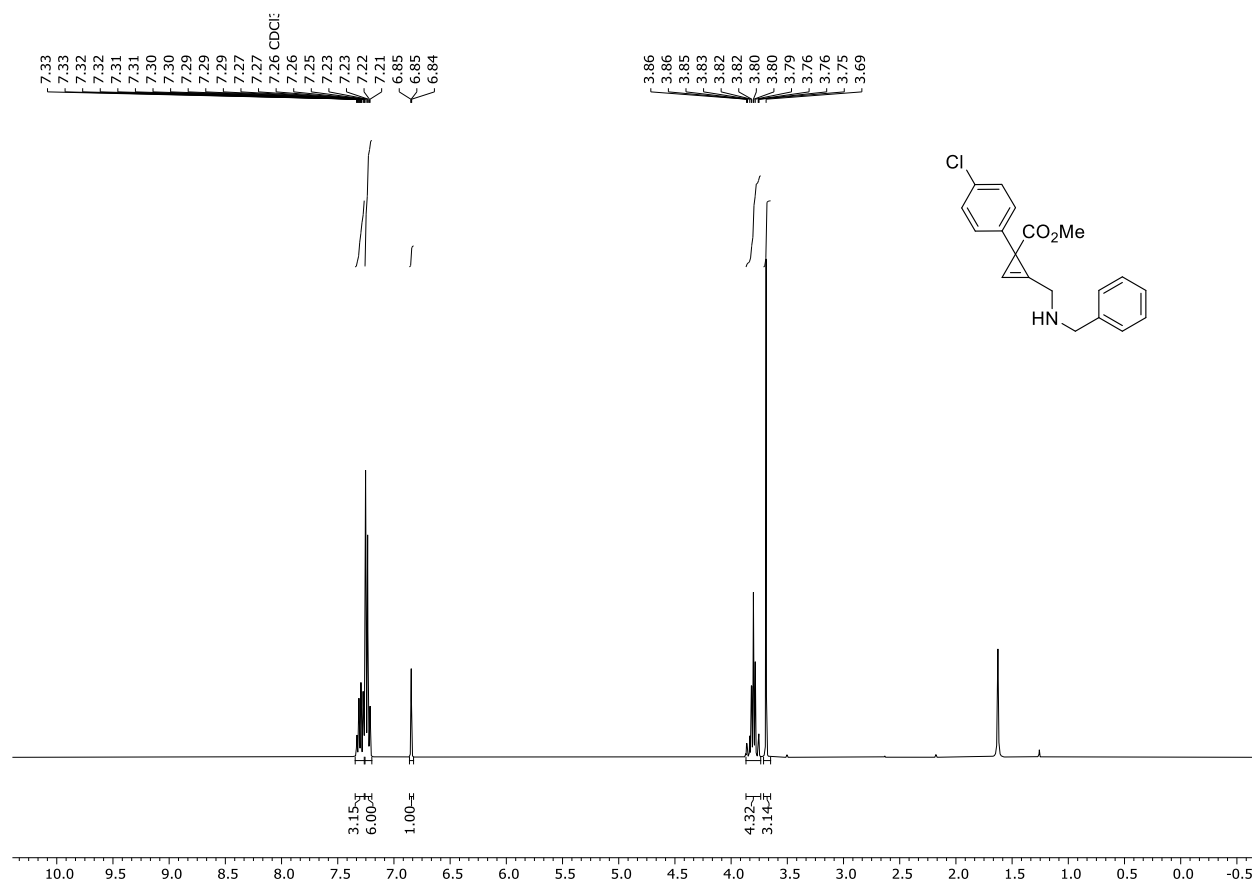

**<sup>13</sup>C NMR Spectrum of 3b (101 MHz, CDCl<sub>3</sub>)**

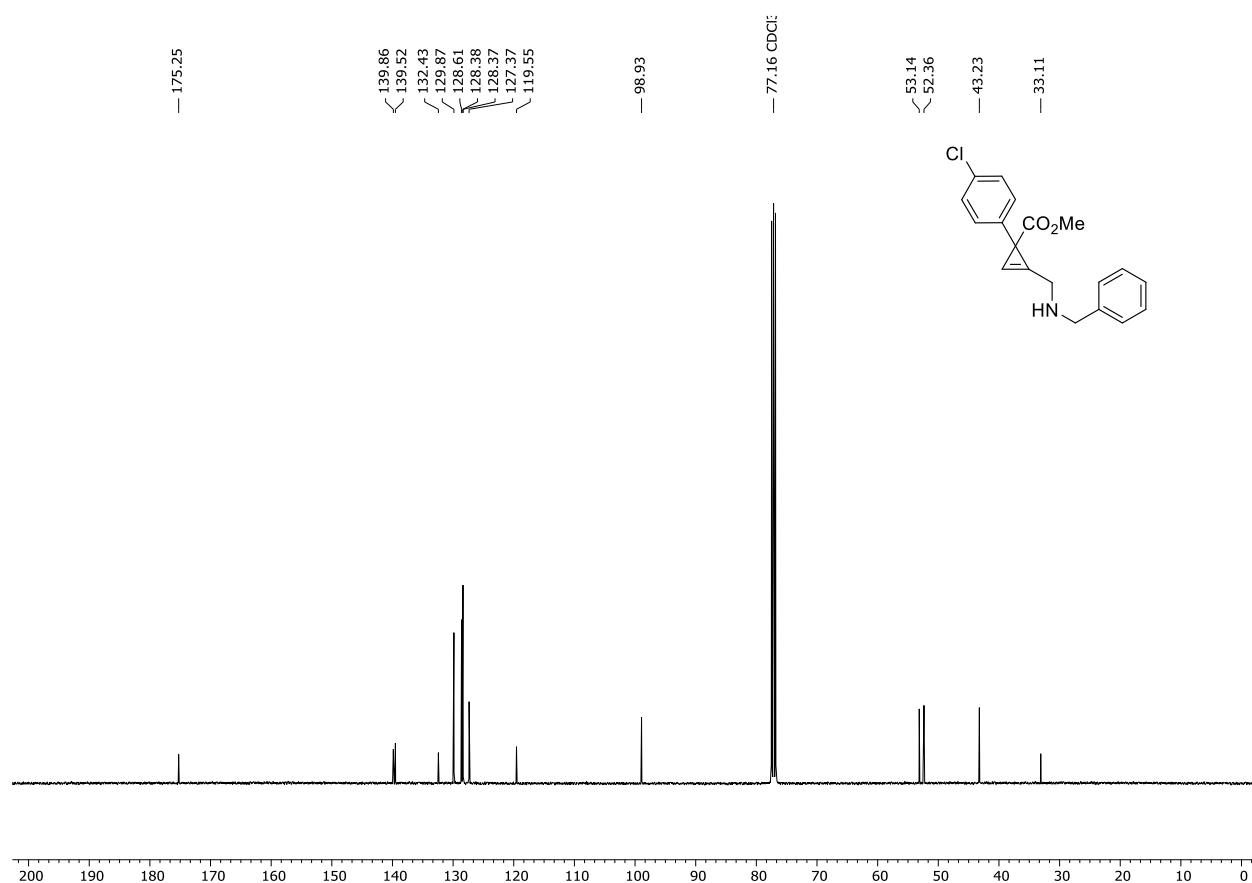



**$^1\text{H}$  NMR Spectrum of 3c (400 MHz,  $\text{CDCl}_3$ )**

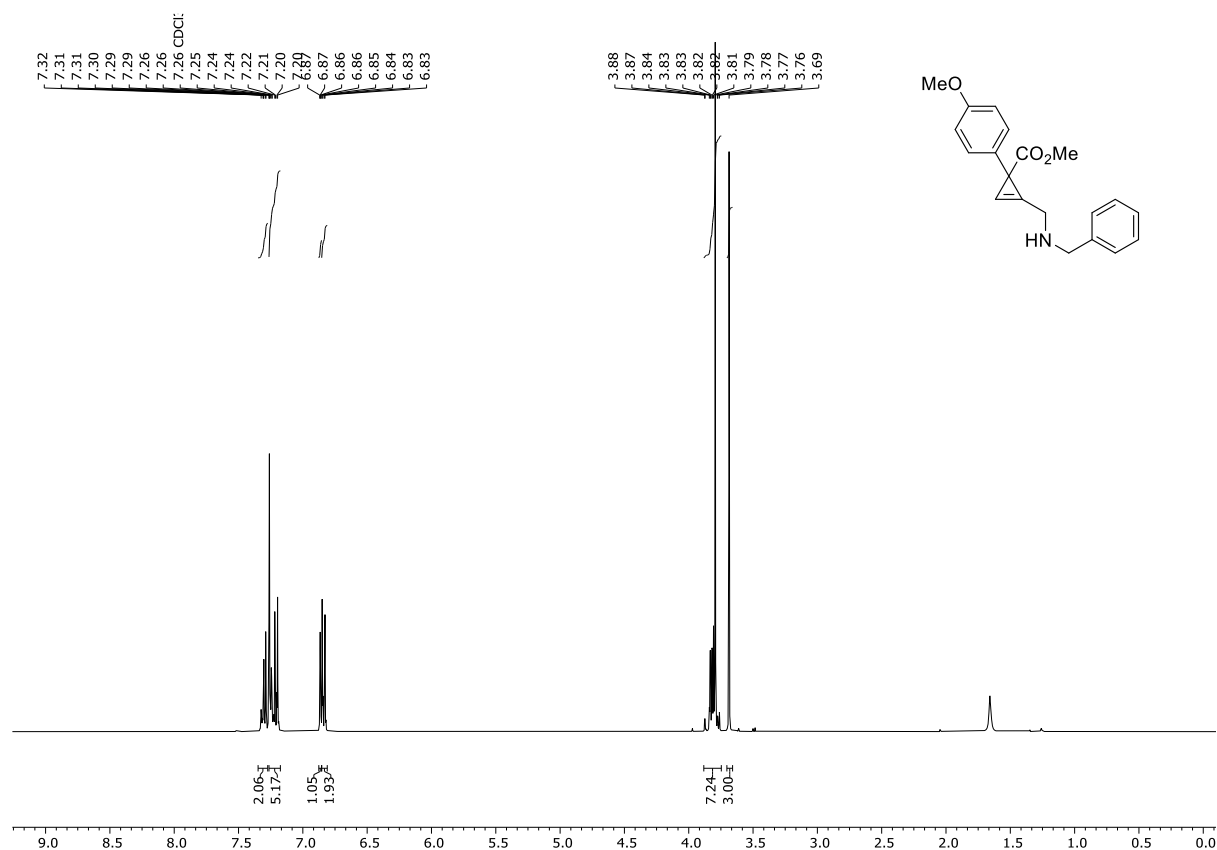

**$^{13}\text{C}$  NMR Spectrum of 3c (101 MHz,  $\text{CDCl}_3$ )**

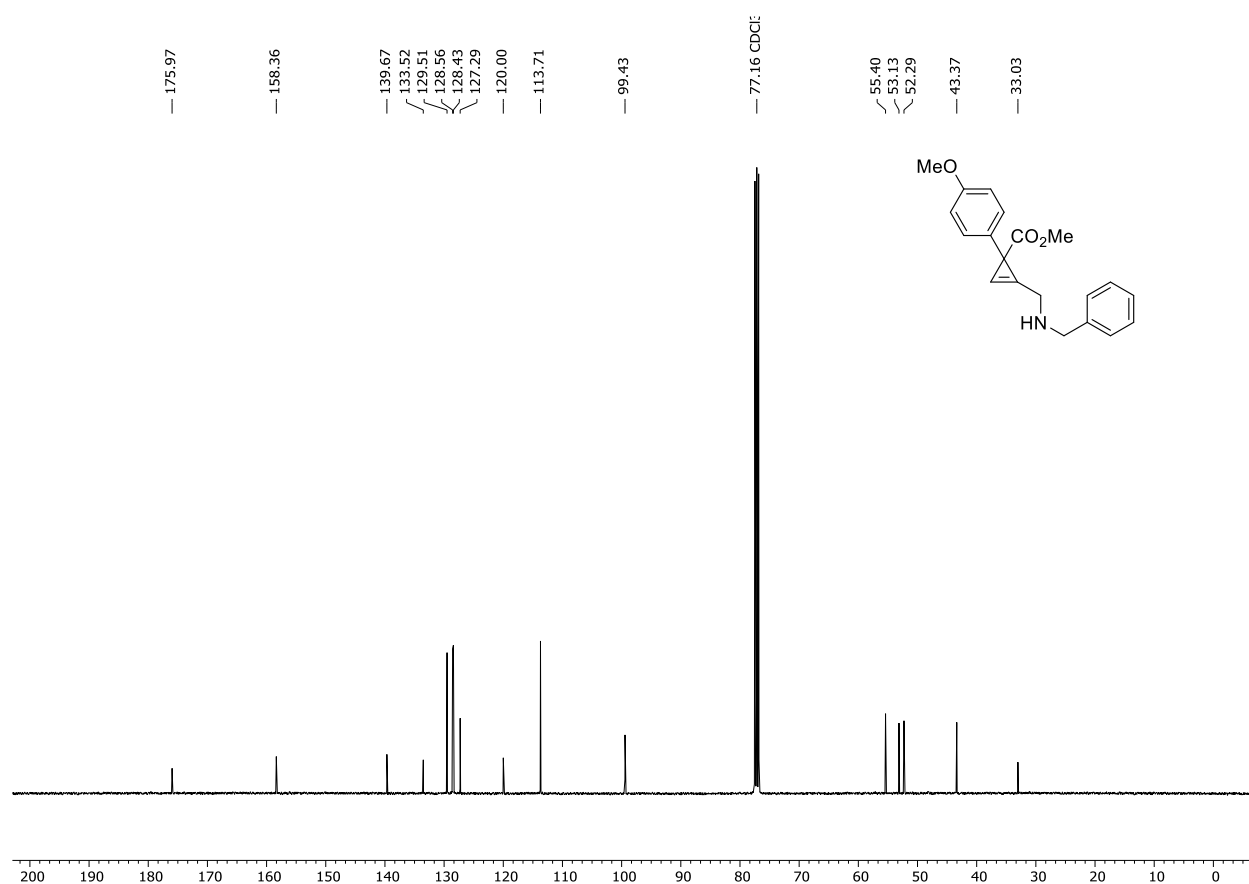

# <sup>1</sup>H NMR Spectrum of 3d (400 MHz, CDCl<sub>3</sub>)

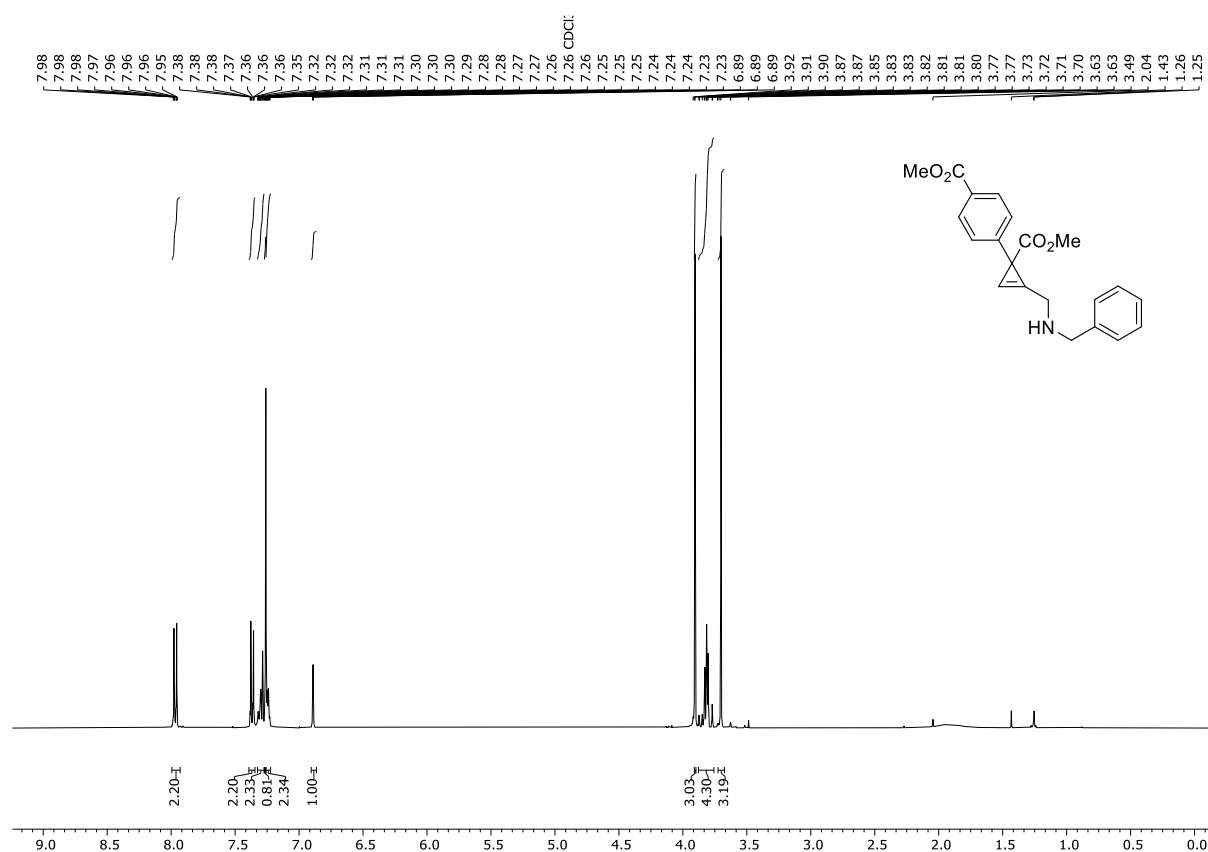

## <sup>13</sup>C NMR Spectrum of 3d (101 MHz, CDCl<sub>3</sub>)

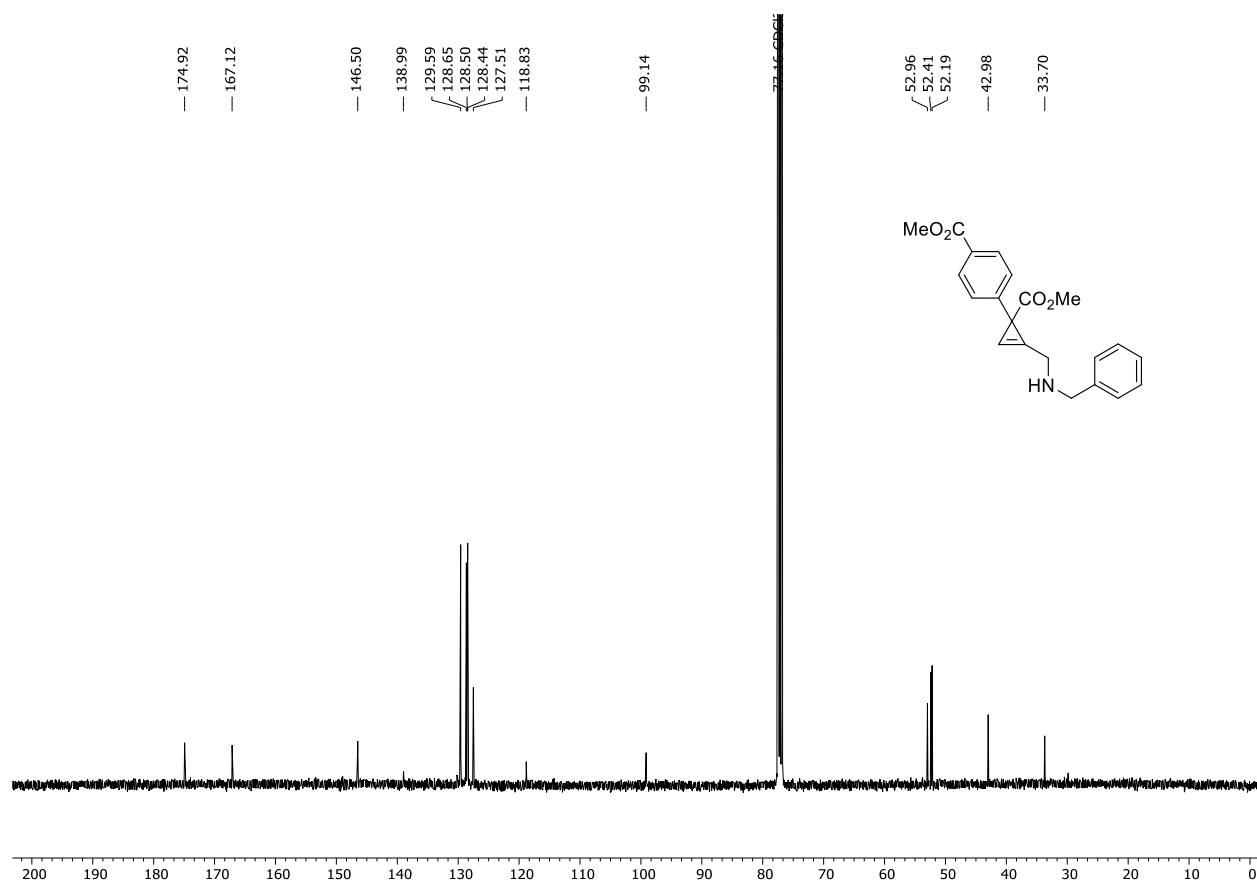

**<sup>1</sup>H NMR Spectrum of 3e (400 MHz, CDCl<sub>3</sub>)**

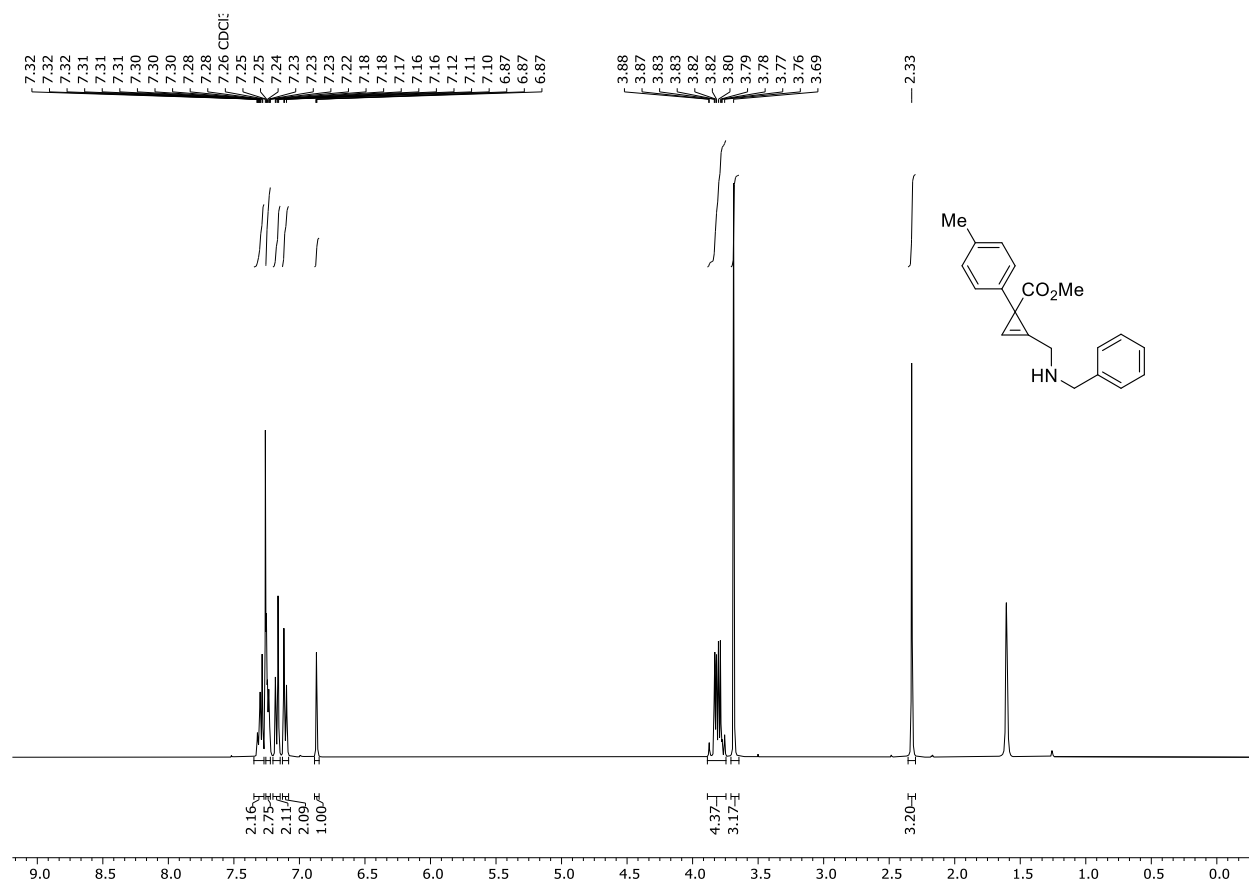

**<sup>13</sup>C NMR Spectrum of 3e (101 MHz, CDCl<sub>3</sub>)**

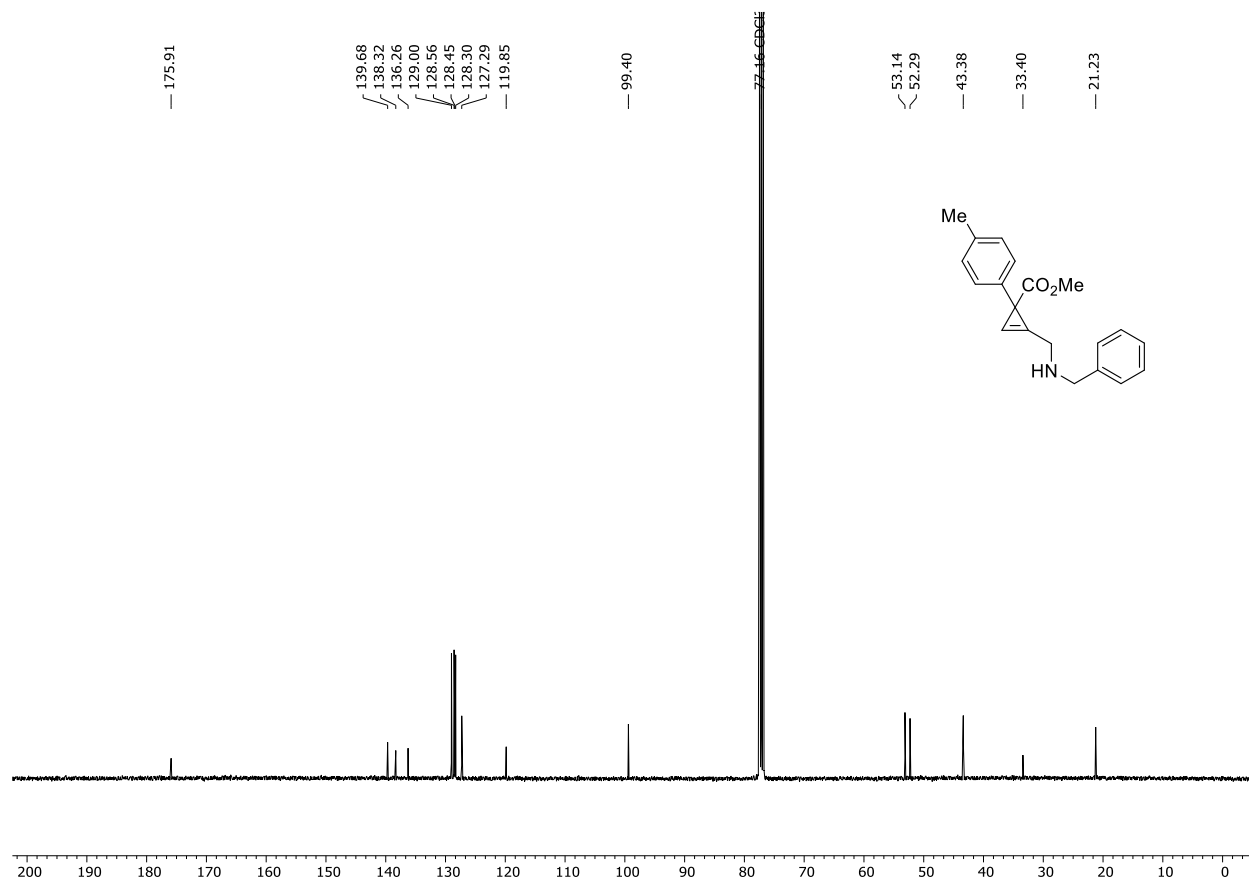

**<sup>1</sup>H NMR Spectrum of 3f (400 MHz, CDCl<sub>3</sub>)**

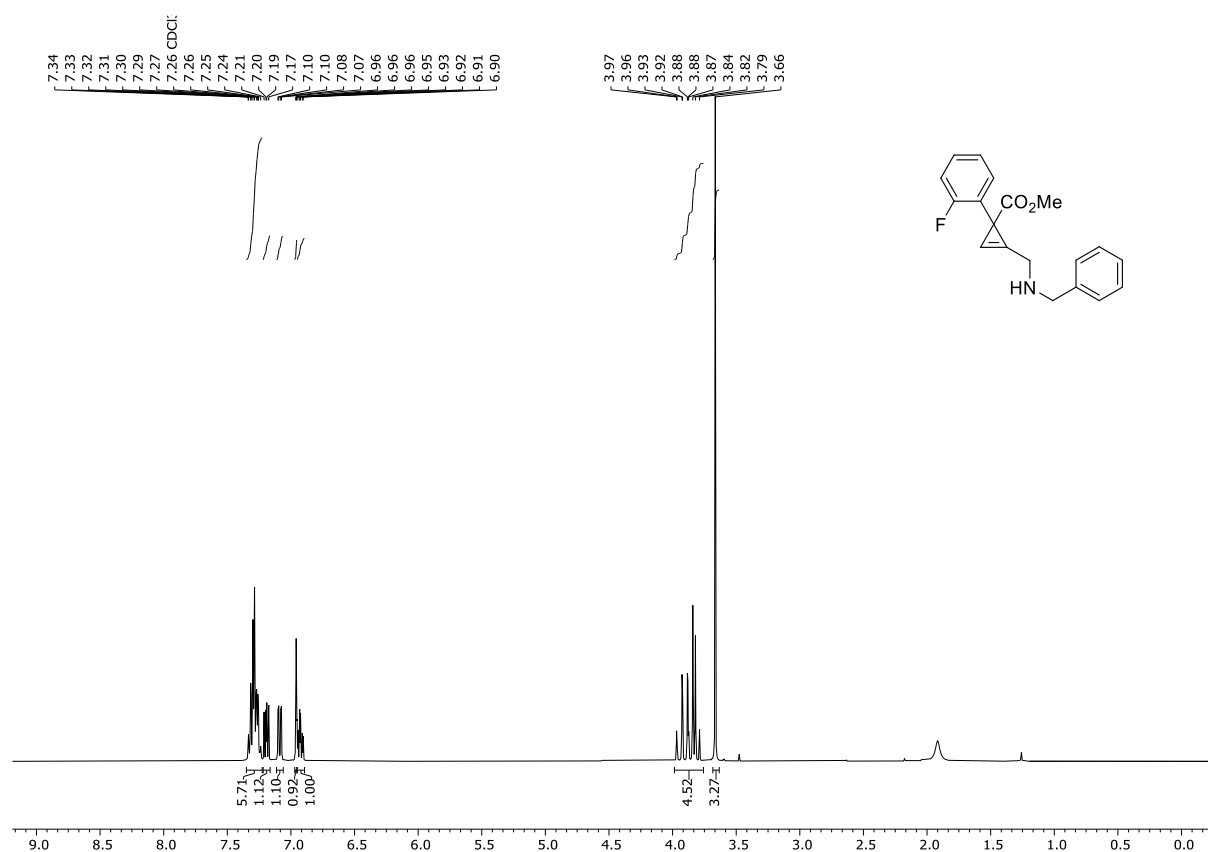

**<sup>13</sup>C NMR Spectrum of 3f (101 MHz, CDCl<sub>3</sub>)**

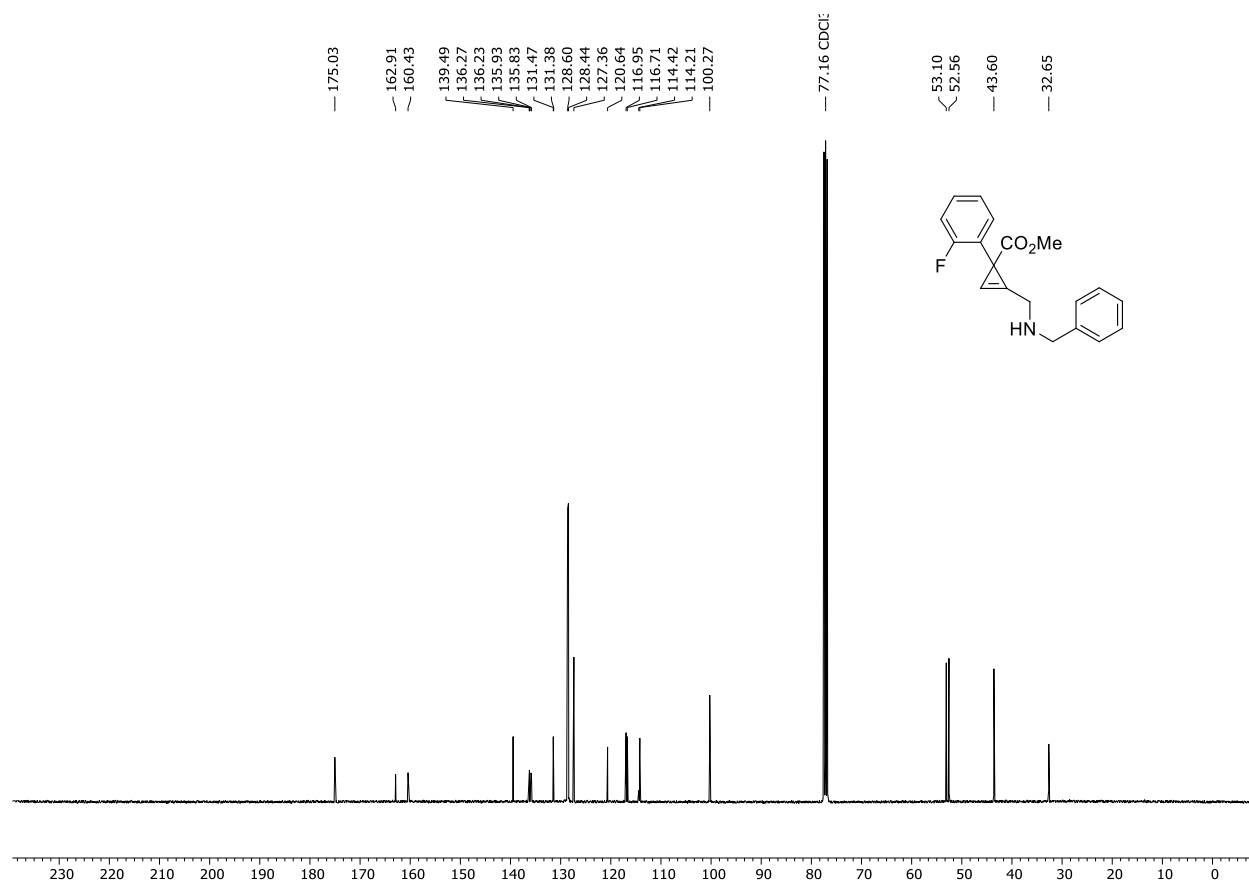

**$^{19}\text{F}$  NMR Spectrum of 3g (376 MHz,  $\text{CDCl}_3$ )**

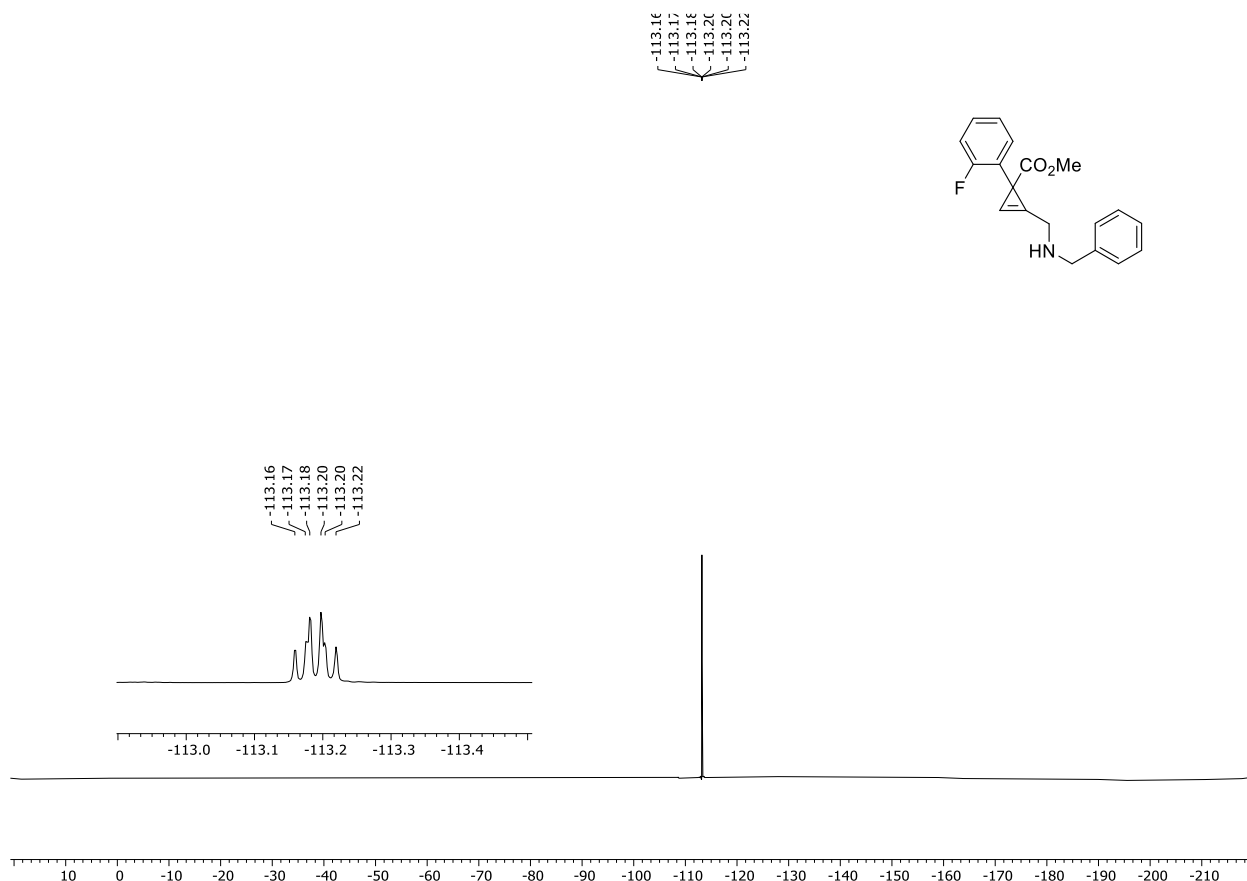

**$^1\text{H}$  NMR Spectrum of 3g (400 MHz,  $\text{CDCl}_3$ )**

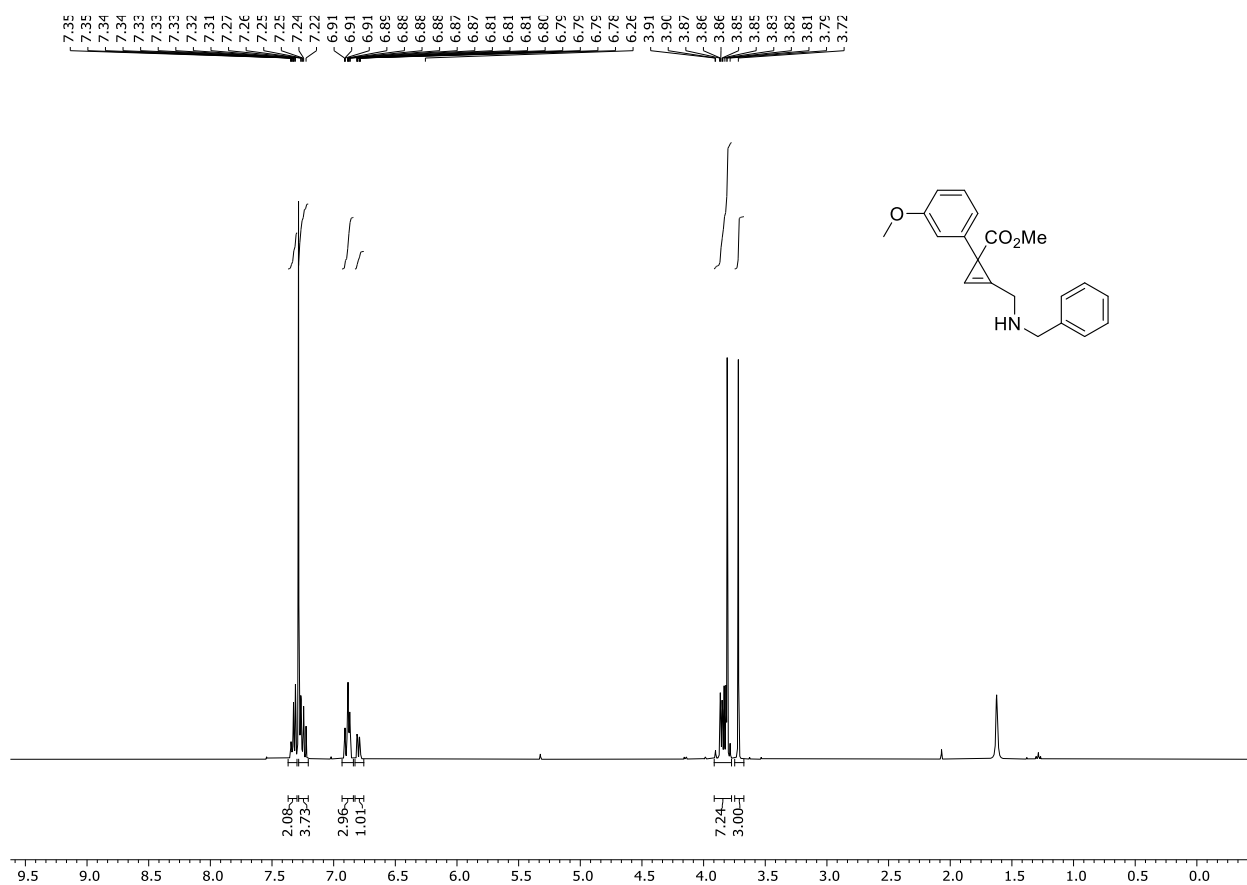

**$^{13}\text{C}$  NMR Spectrum of 3g (101 MHz,  $\text{CDCl}_3$ )**

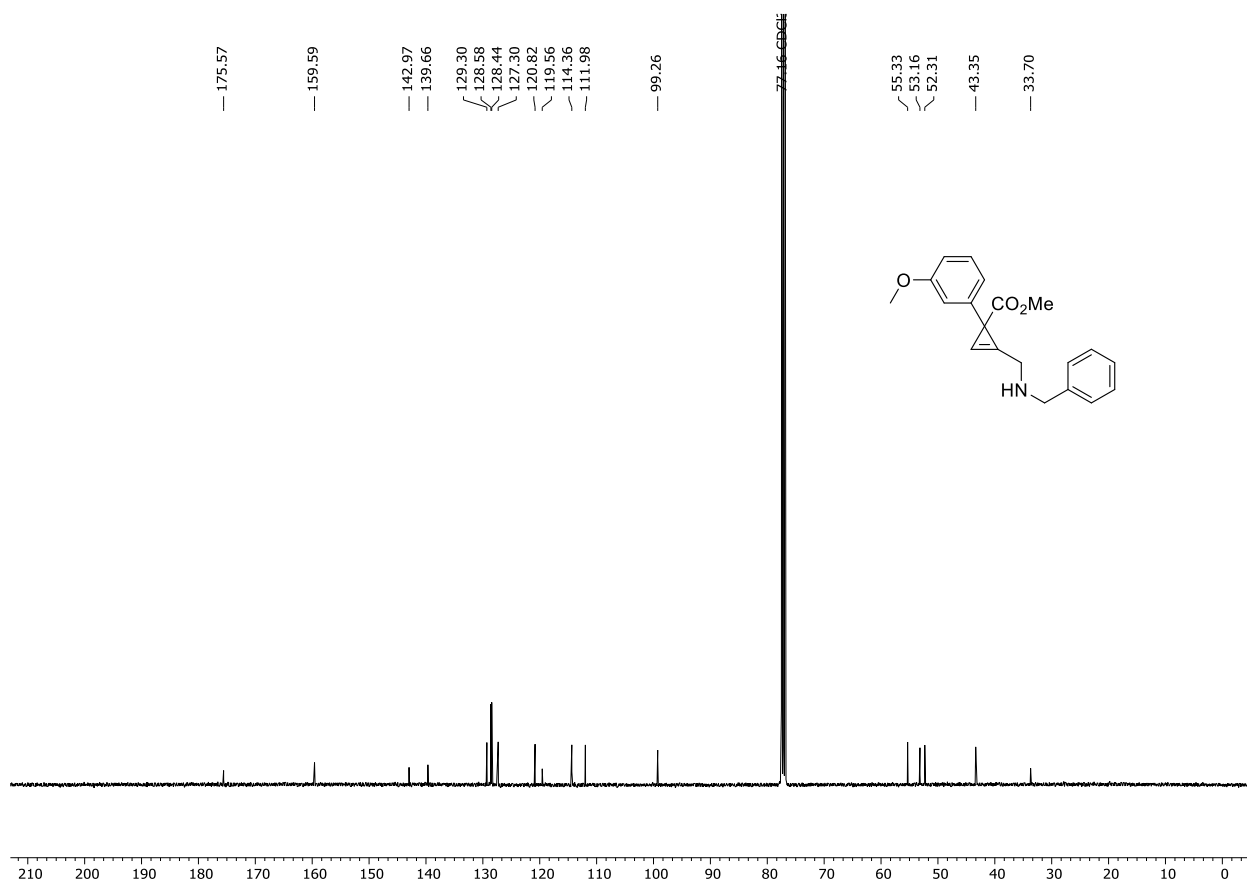

**$^1\text{H}$  NMR Spectrum of 3h (400 MHz,  $\text{CDCl}_3$ )**

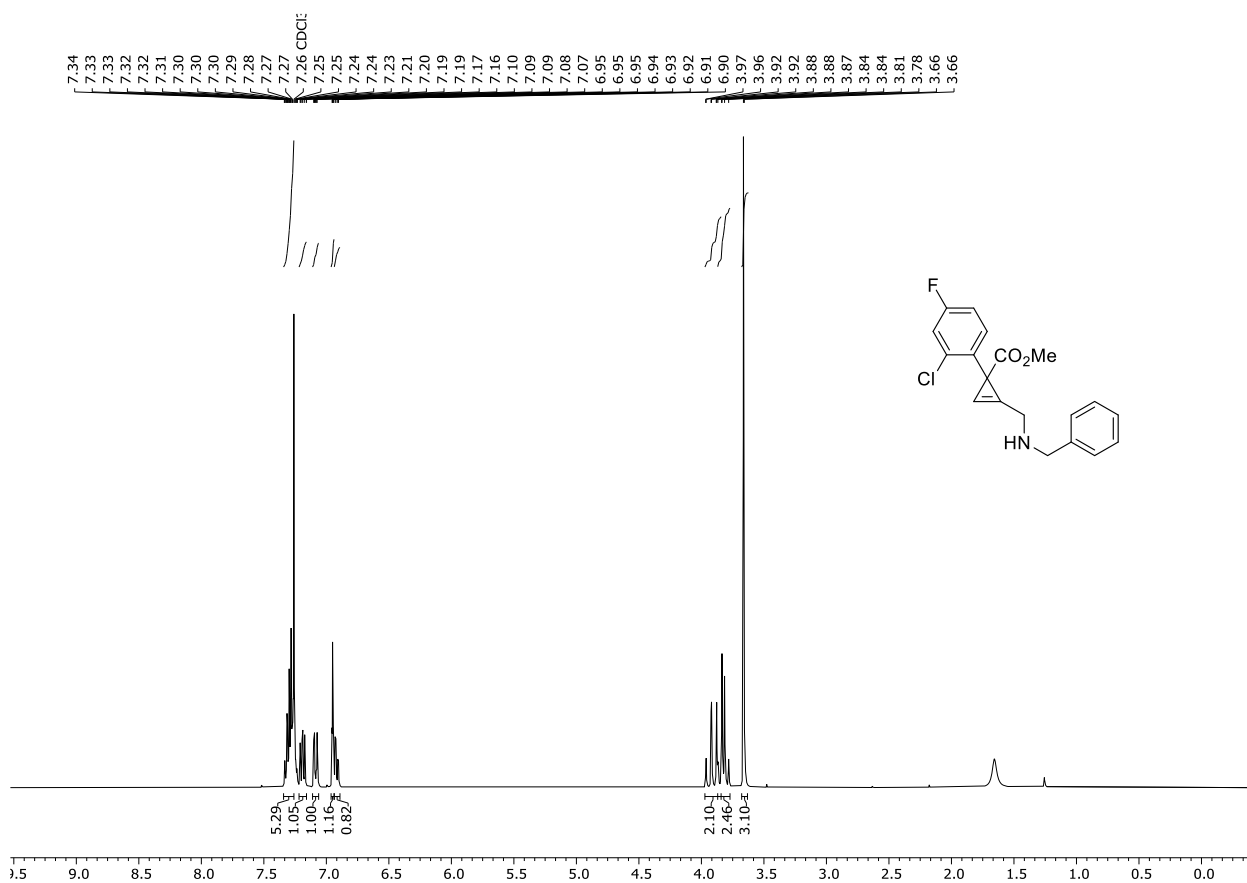

**$^{13}\text{C}$  NMR Spectrum of 3h (101 MHz,  $\text{CDCl}_3$ )**

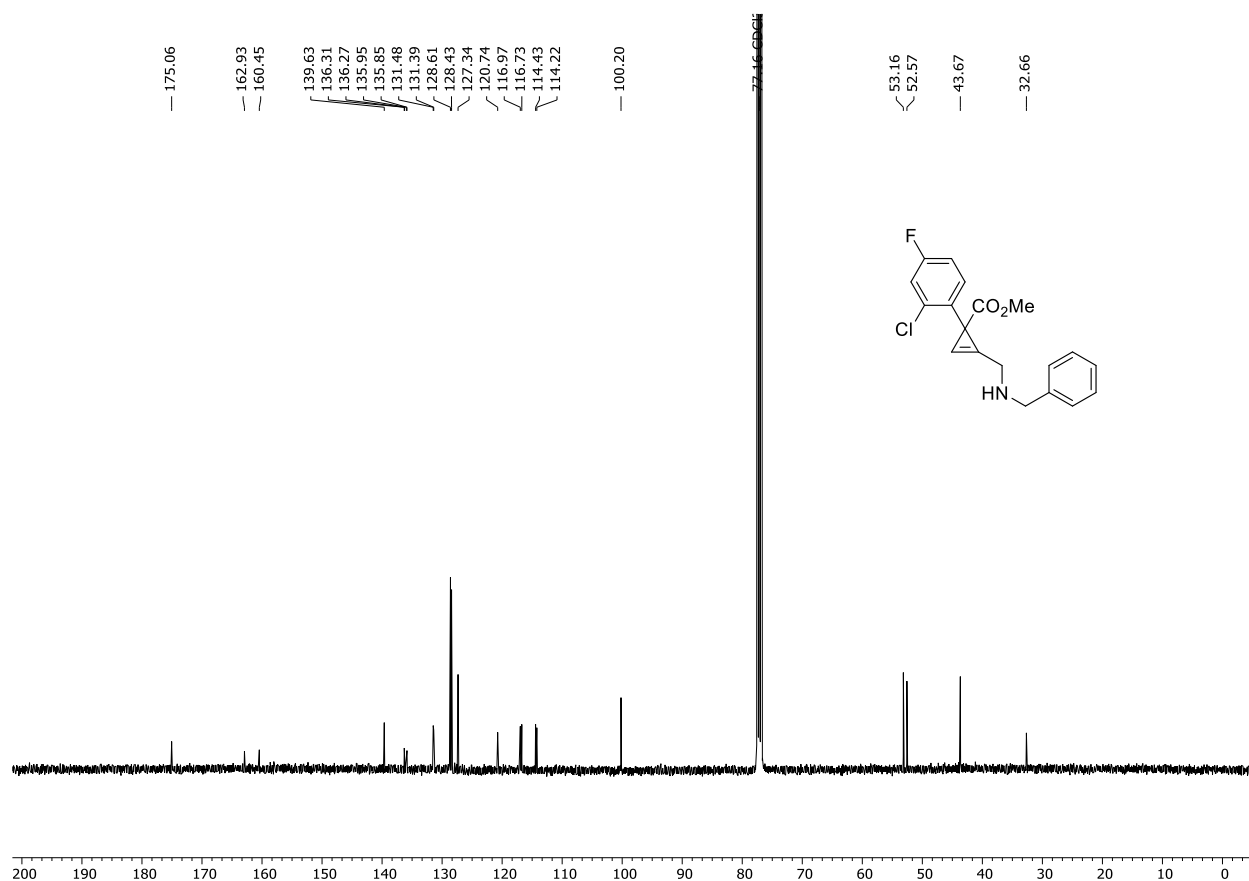

**$^{19}\text{F}$  NMR Spectrum of 3h (376 MHz,  $\text{CDCl}_3$ )**

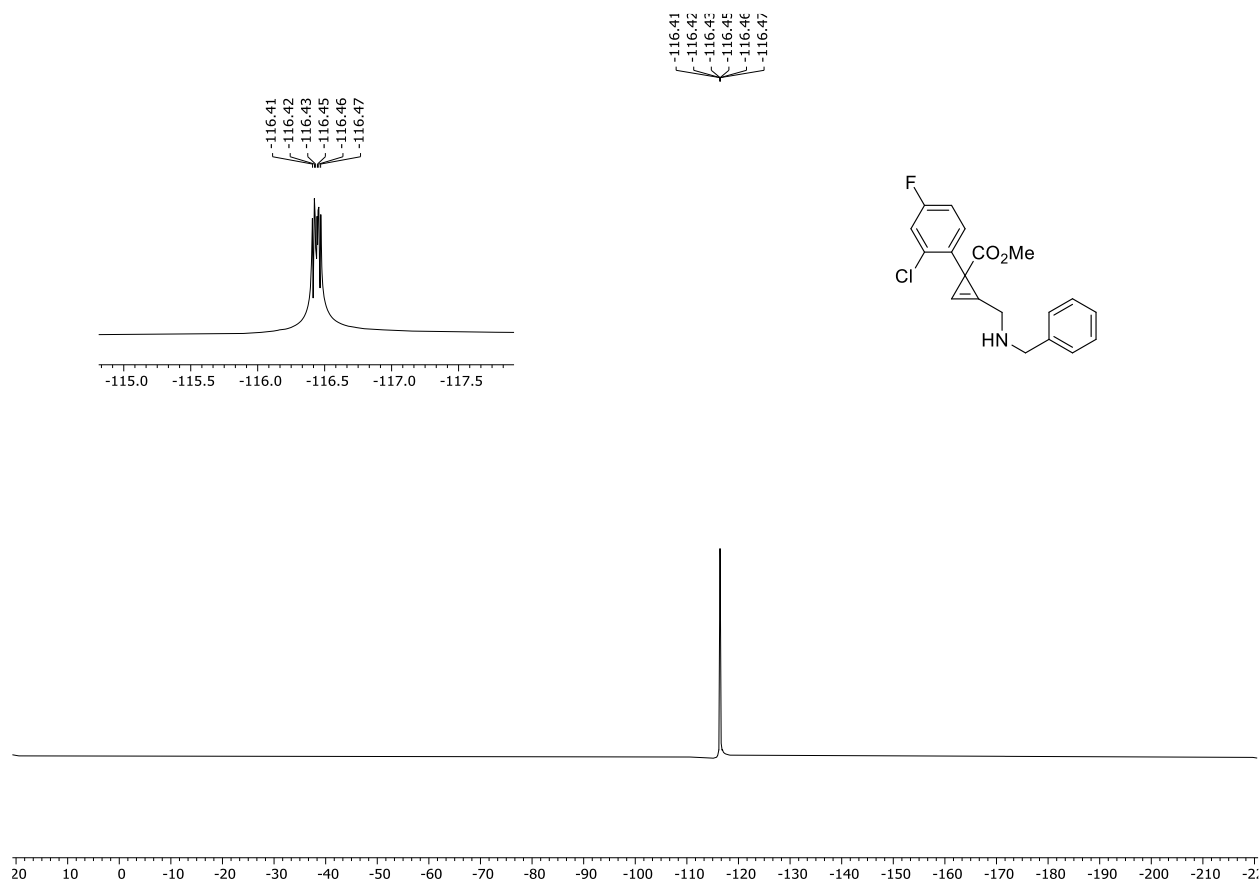

**<sup>1</sup>H NMR Spectrum of 3i (400 MHz, CDCl<sub>3</sub>)**

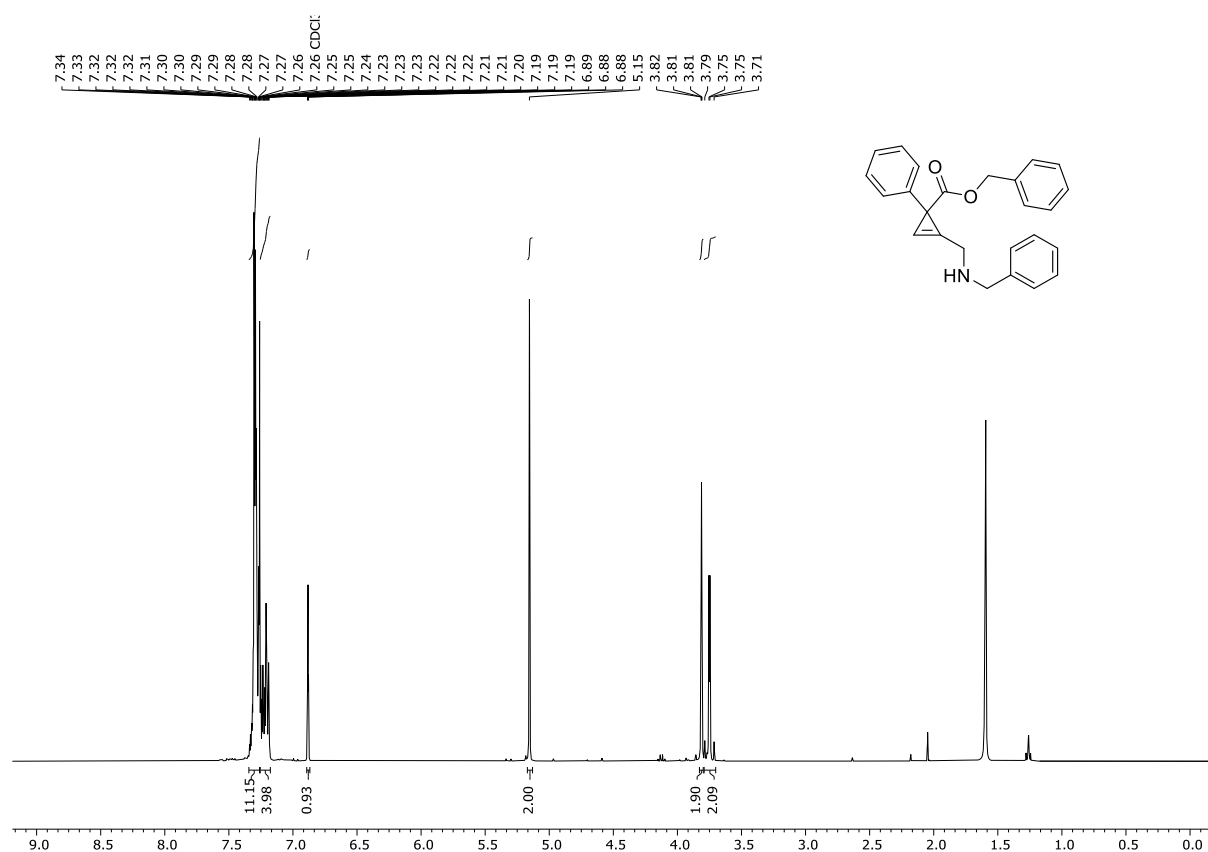

**<sup>13</sup>C NMR Spectrum of 3i (101 MHz, CDCl<sub>3</sub>)**

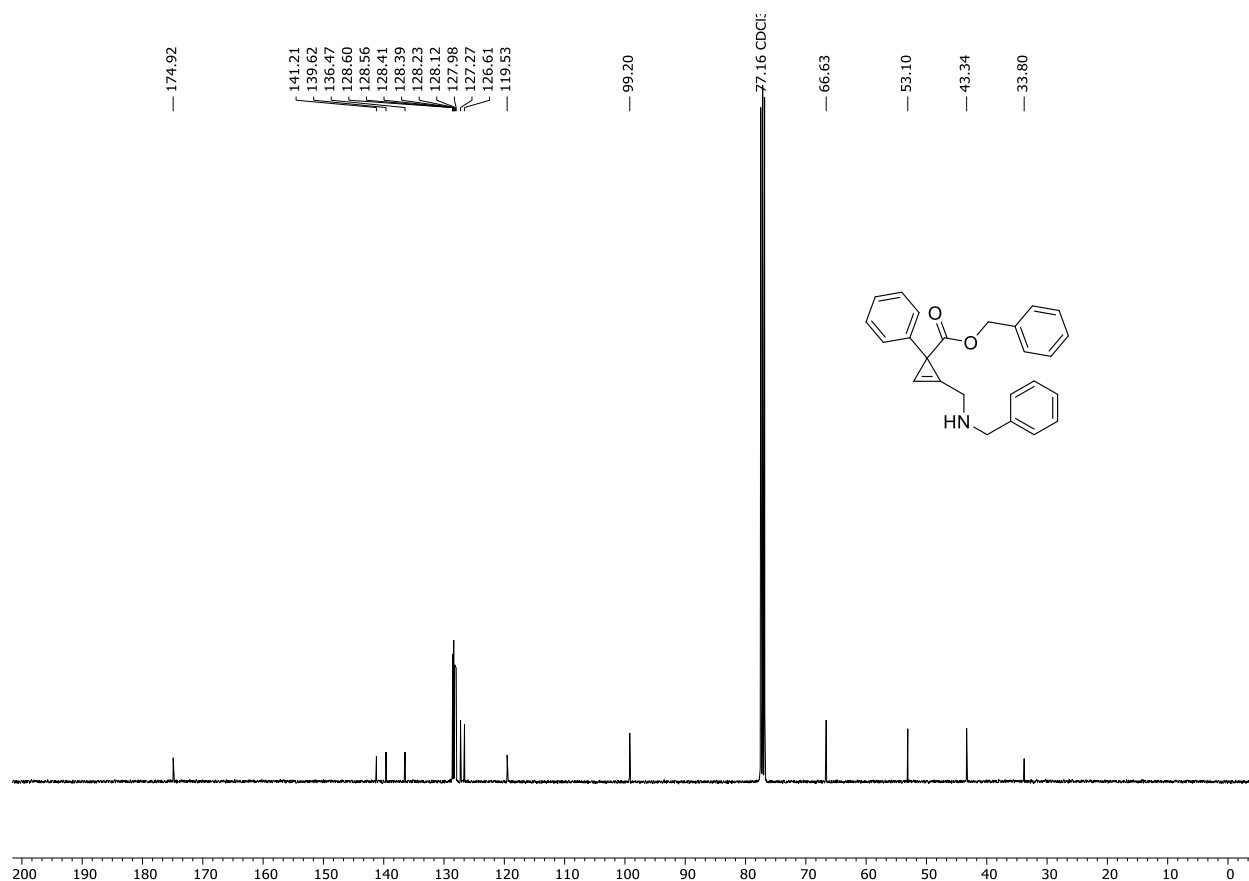



**<sup>1</sup>H NMR Spectrum of 3j (400 MHz, CDCl<sub>3</sub>)**

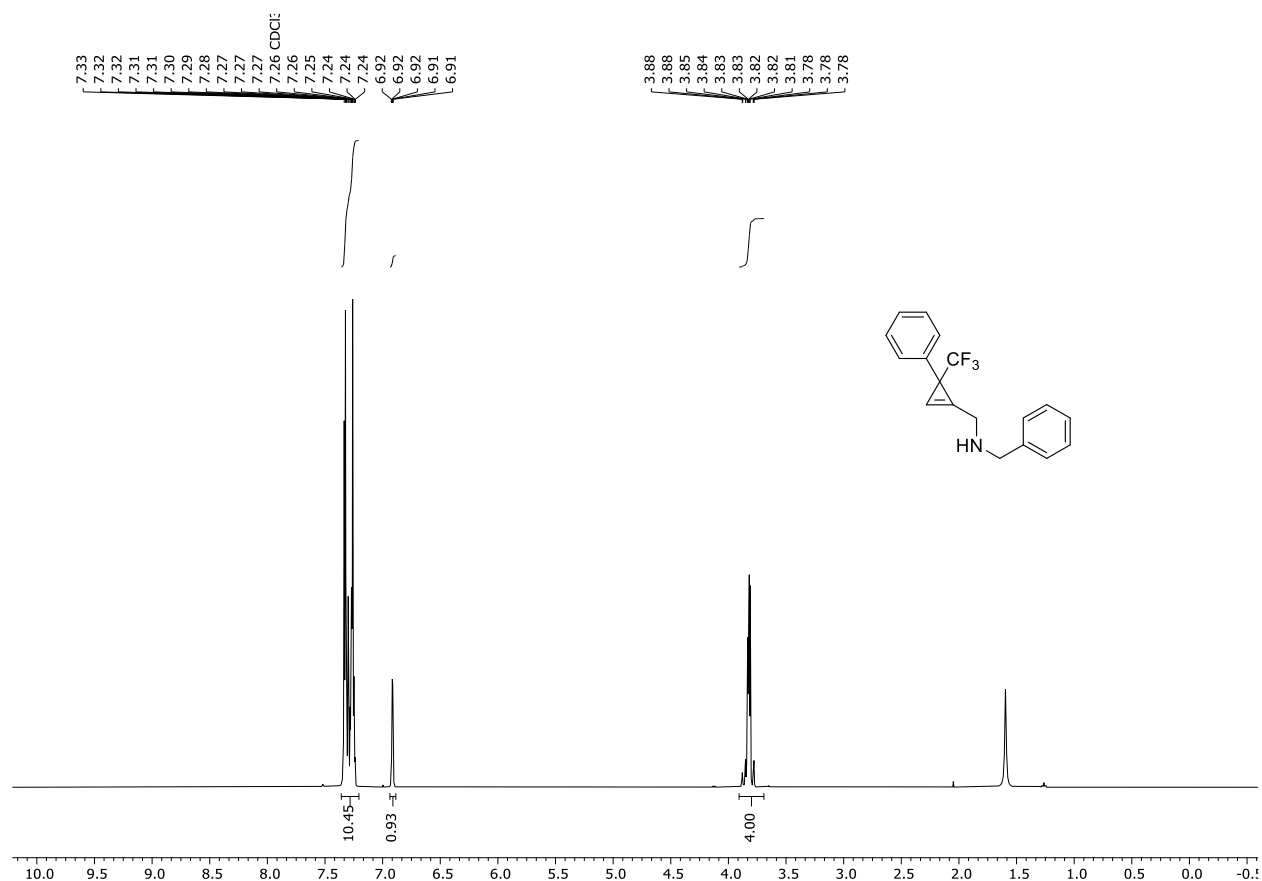

**<sup>13</sup>C NMR Spectrum of 3j (101 MHz, CDCl<sub>3</sub>)**

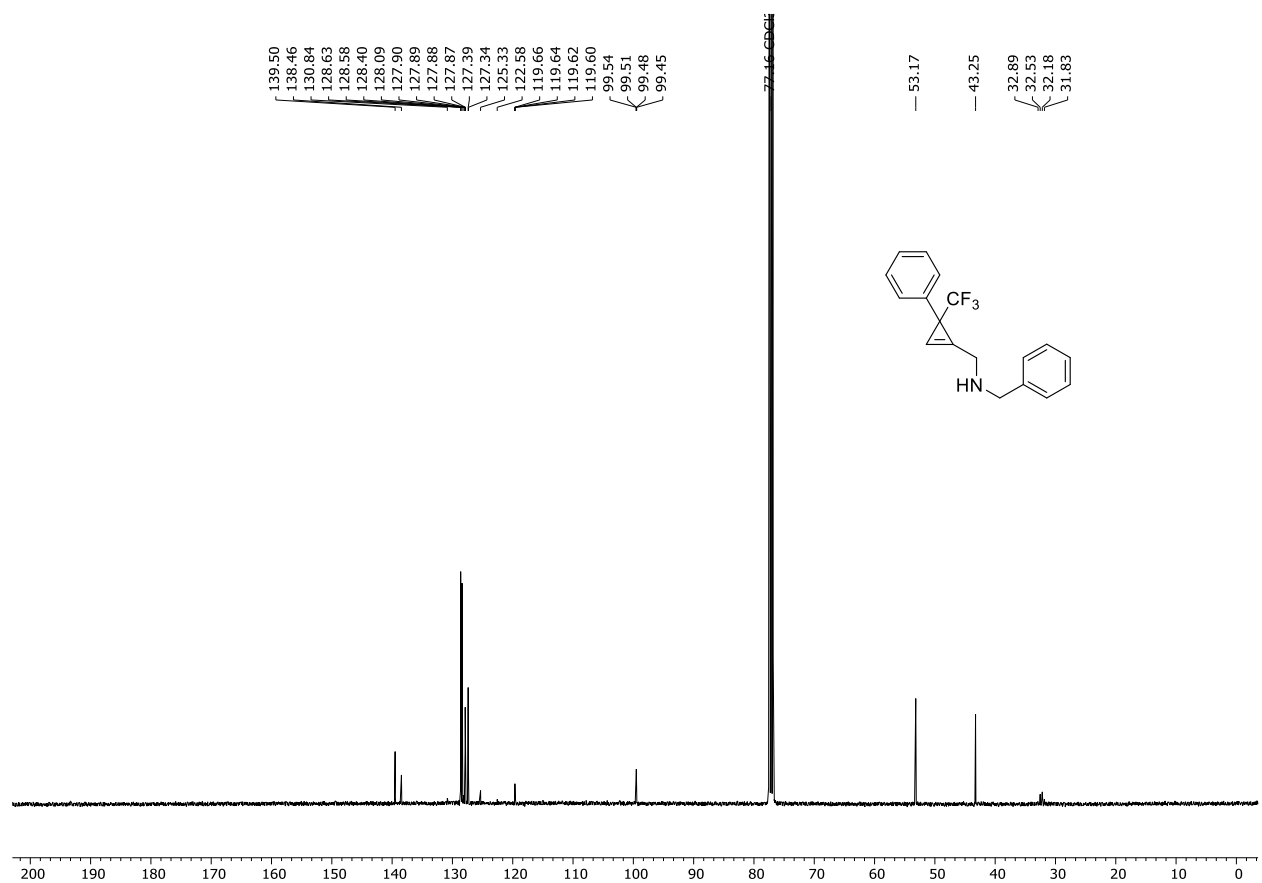

**$^{19}\text{F}$  NMR Spectrum of 3j (376 MHz,  $\text{CDCl}_3$ )**

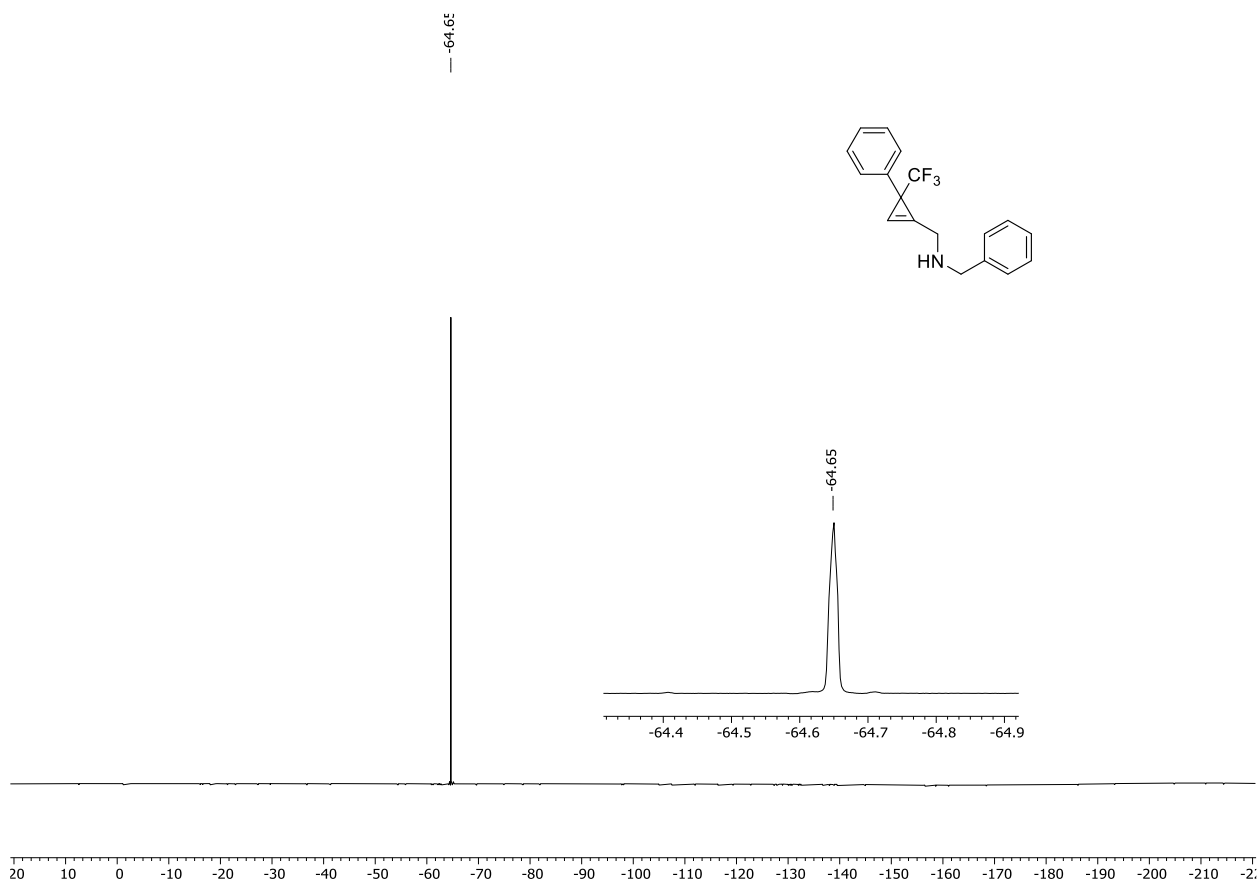

**$^1\text{H}$  NMR Spectrum of 3k (400 MHz,  $\text{CDCl}_3$ )**

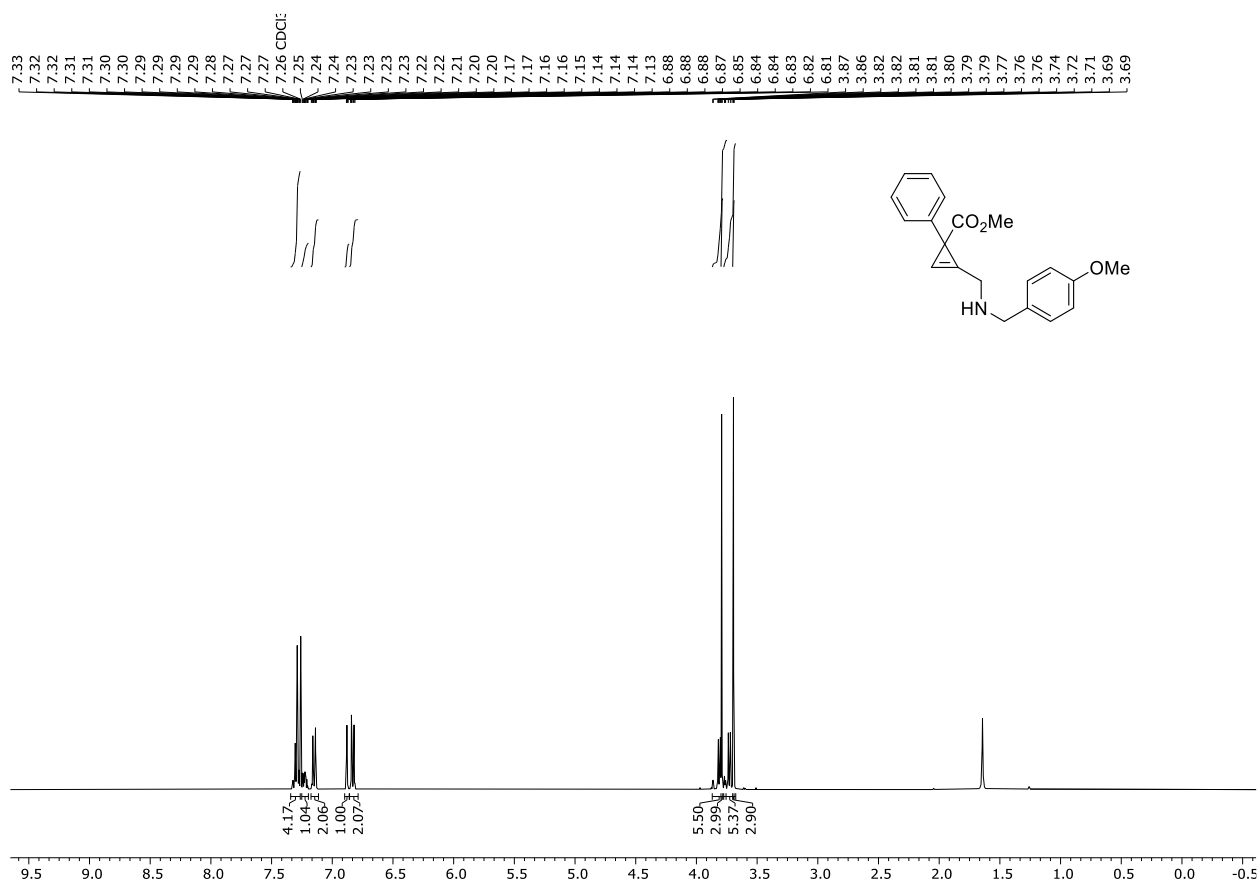

**$^{13}\text{C}$  NMR Spectrum of 3k (101 MHz,  $\text{CDCl}_3$ )**

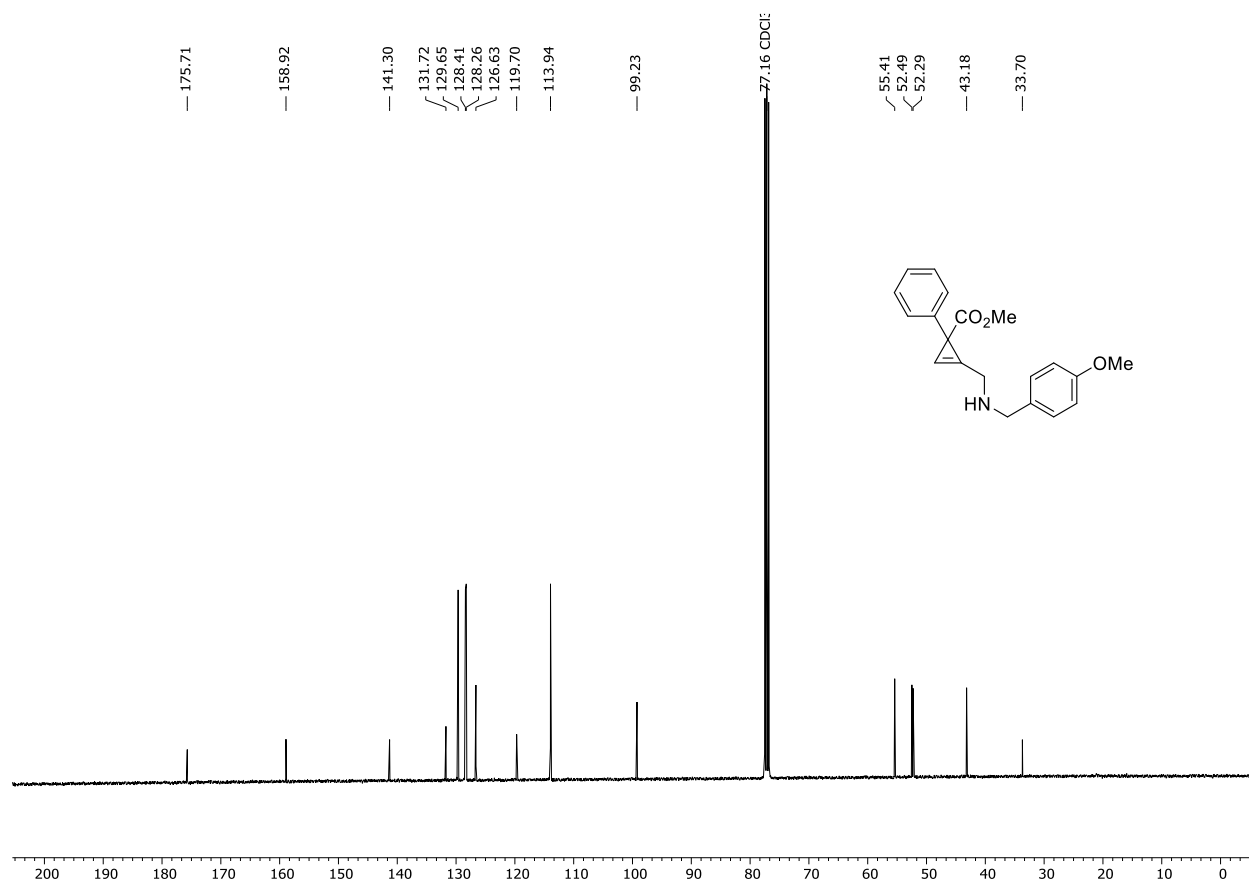

**$^1\text{H}$  NMR Spectrum of 3l (400 MHz,  $\text{CDCl}_3$ )**

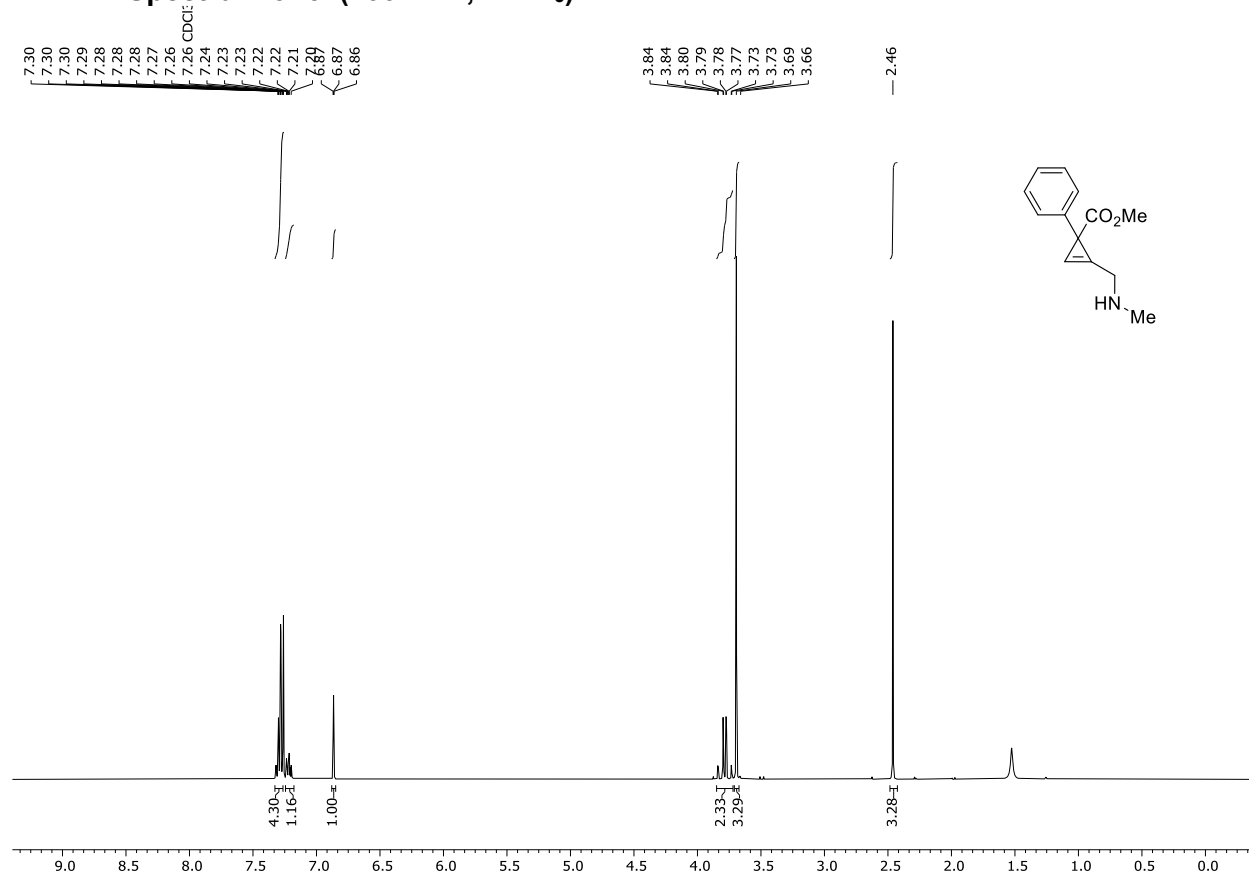

**$^{13}\text{C}$  NMR Spectrum of 3l (101 MHz,  $\text{CDCl}_3$ )**

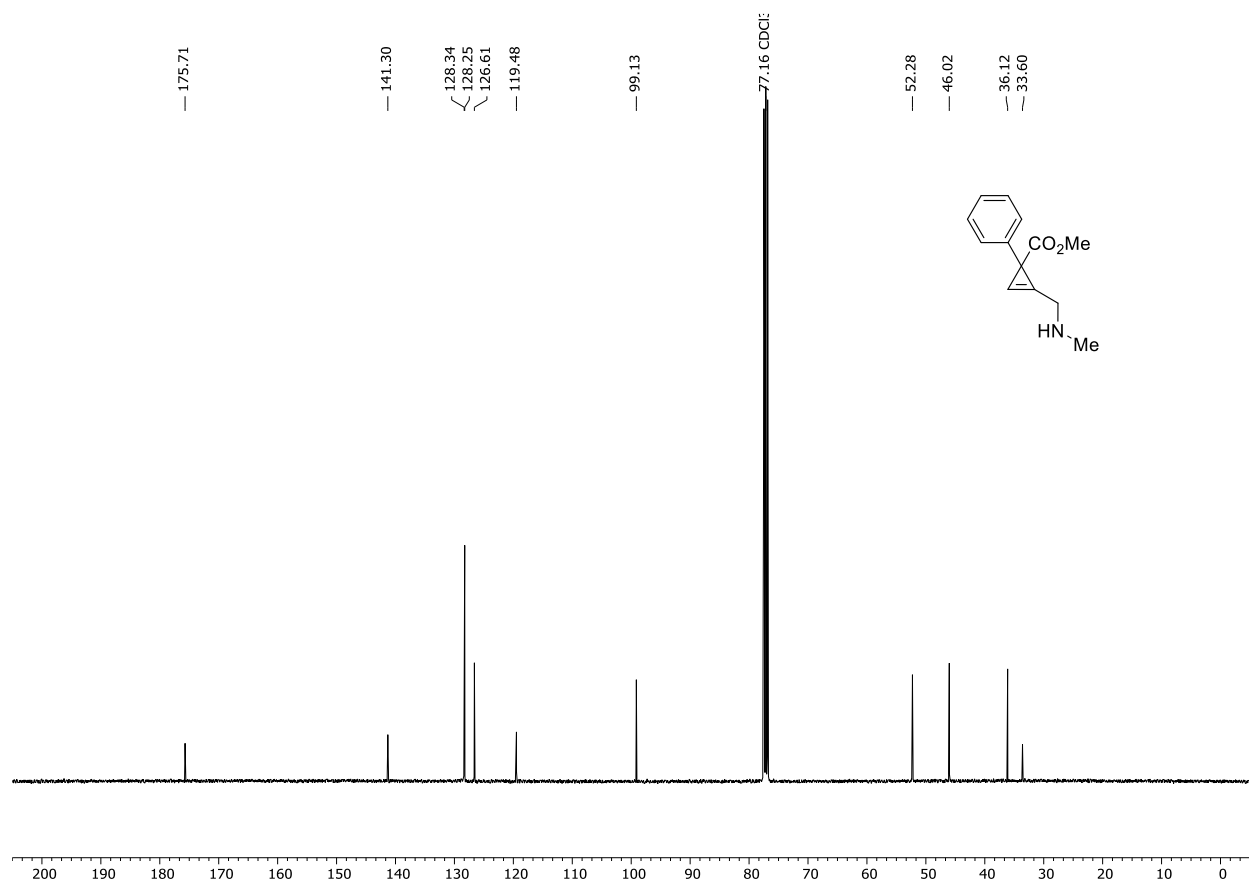

**$^1\text{H}$  NMR Spectrum of 3m (400 MHz,  $\text{CDCl}_3$ )**

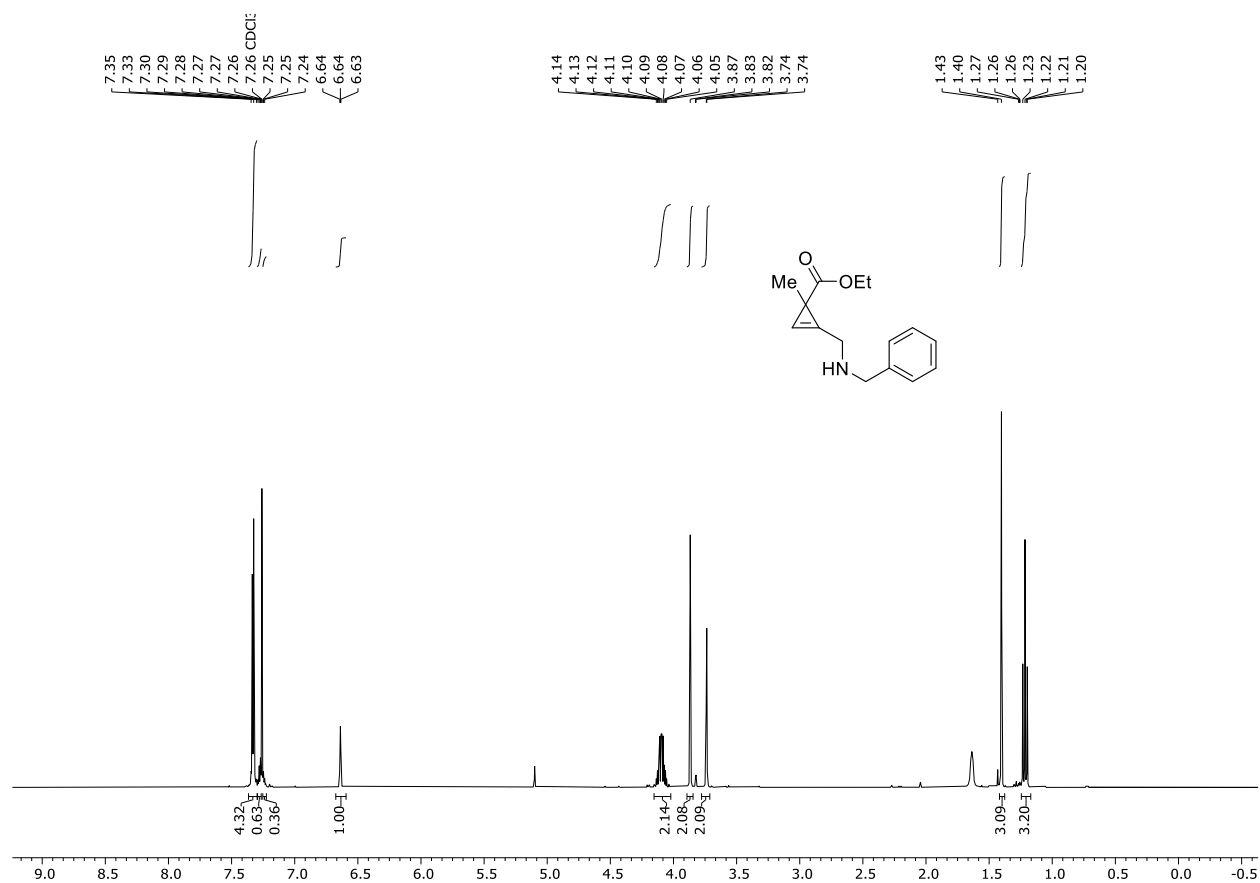

**$^{13}\text{C}$  NMR Spectrum of 3m (101 MHz,  $\text{CDCl}_3$ )**

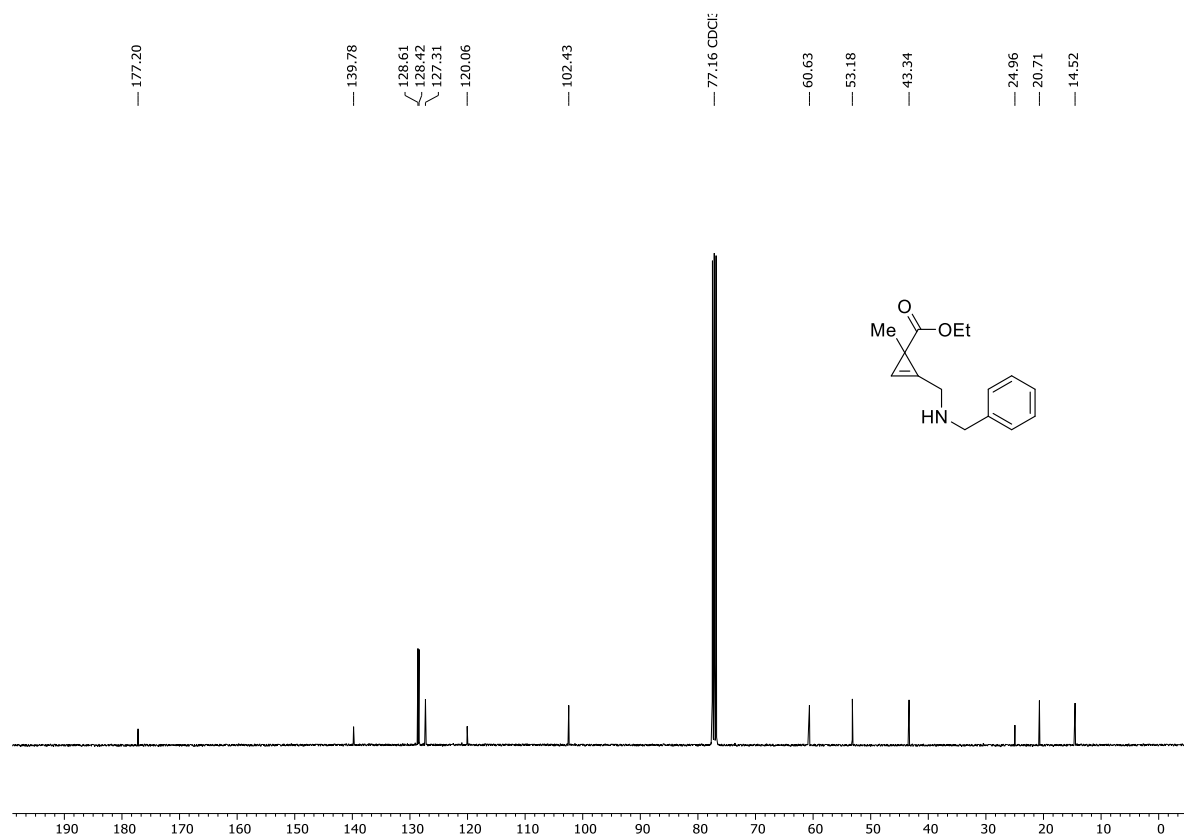

**$^1\text{H}$  NMR Spectrum of 3n (400 MHz,  $\text{CDCl}_3$ )**

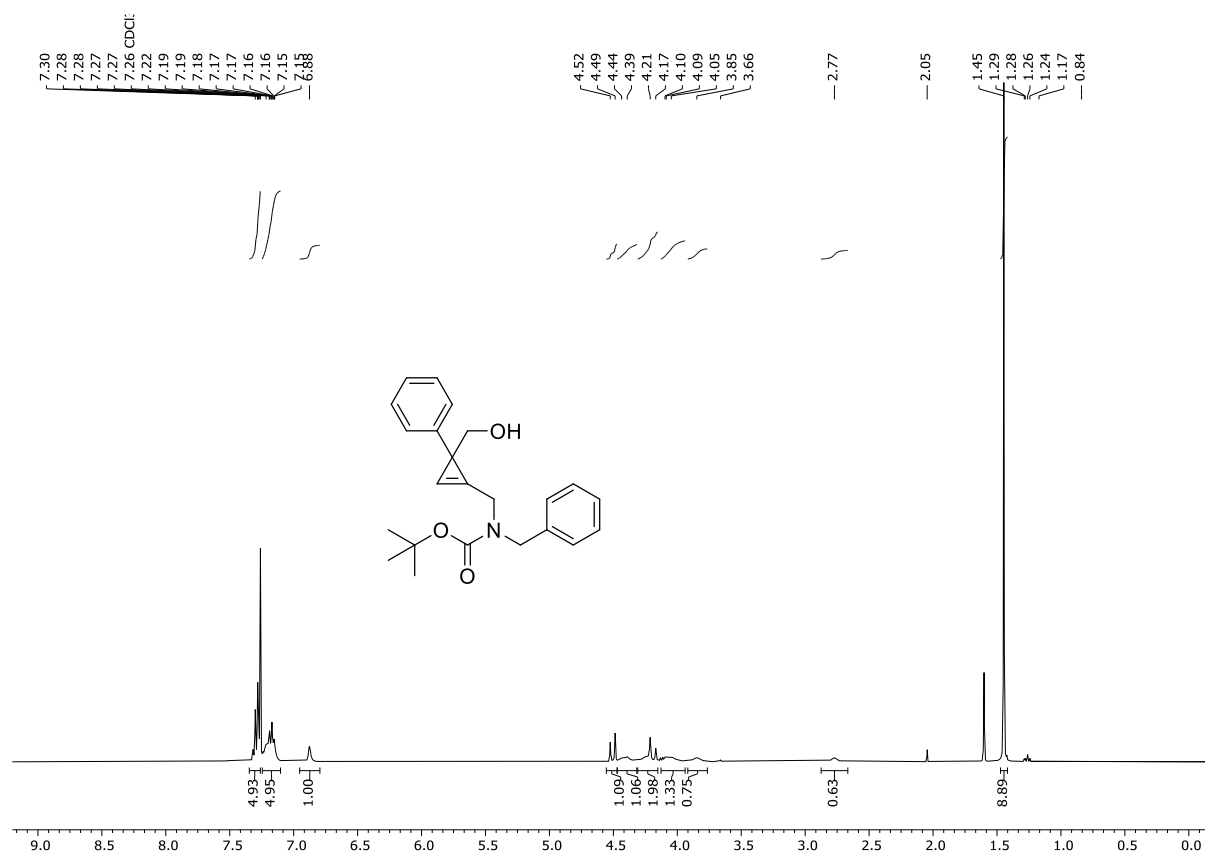

**$^{13}\text{C}$  NMR Spectrum of 3n (101 MHz,  $\text{CDCl}_3$ )**

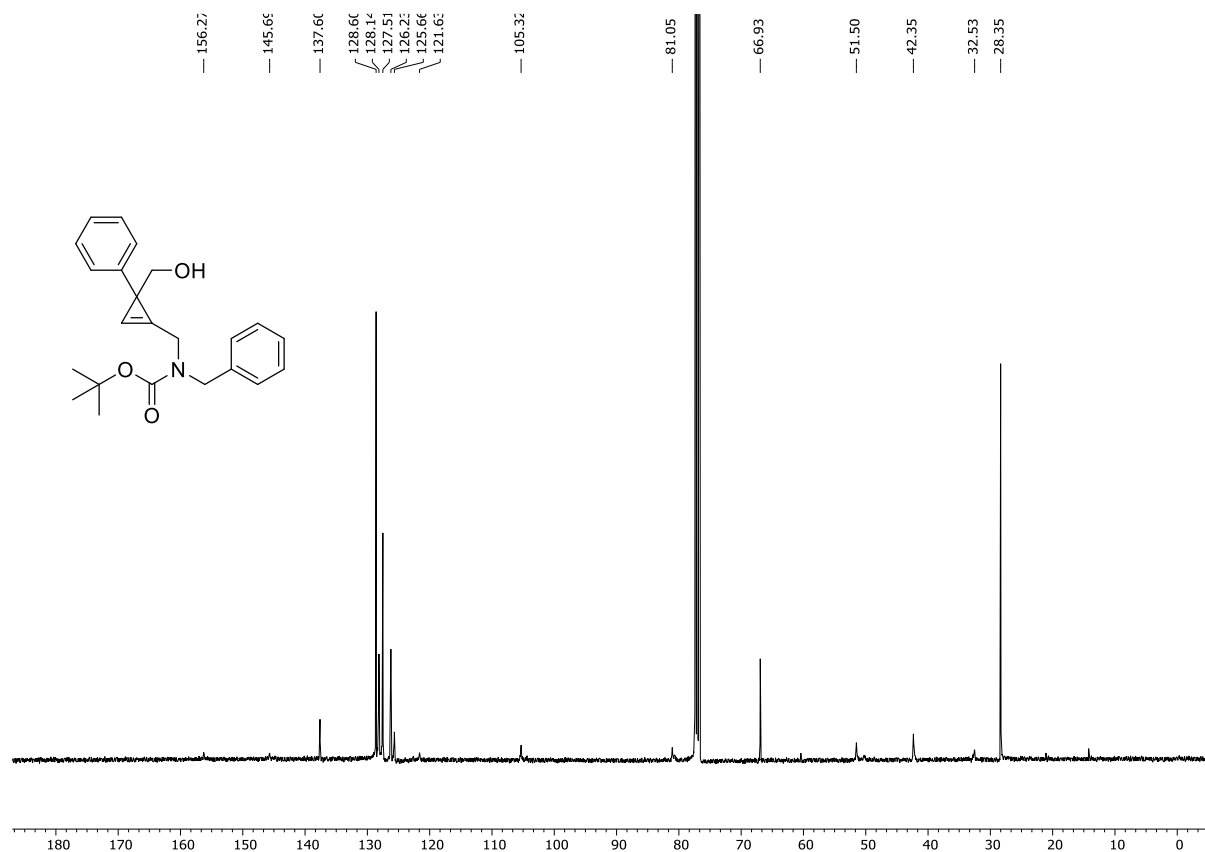

**$^1\text{H}$  NMR Spectrum of 3o (400 MHz,  $\text{CDCl}_3$ )**

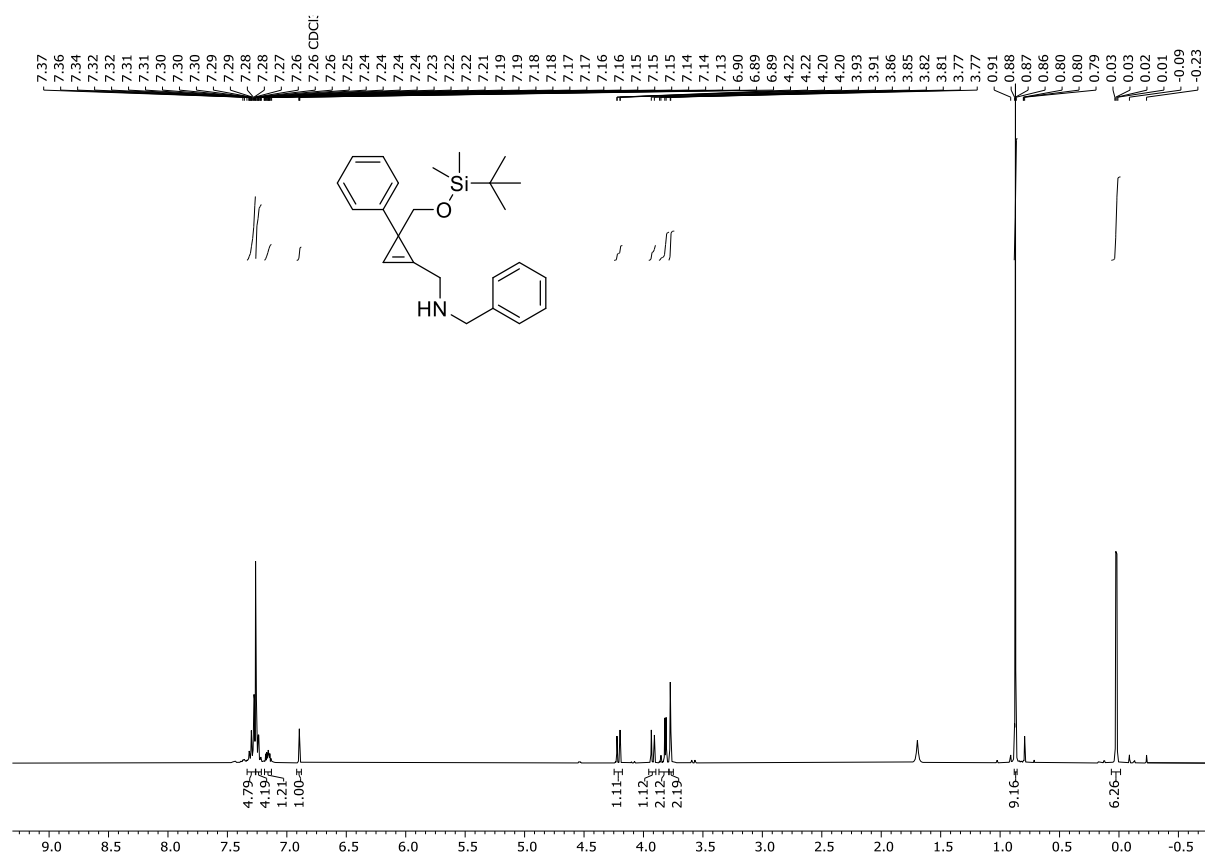

**$^{13}\text{C}$  NMR Spectrum of 3n (101 MHz,  $\text{CDCl}_3$ )**

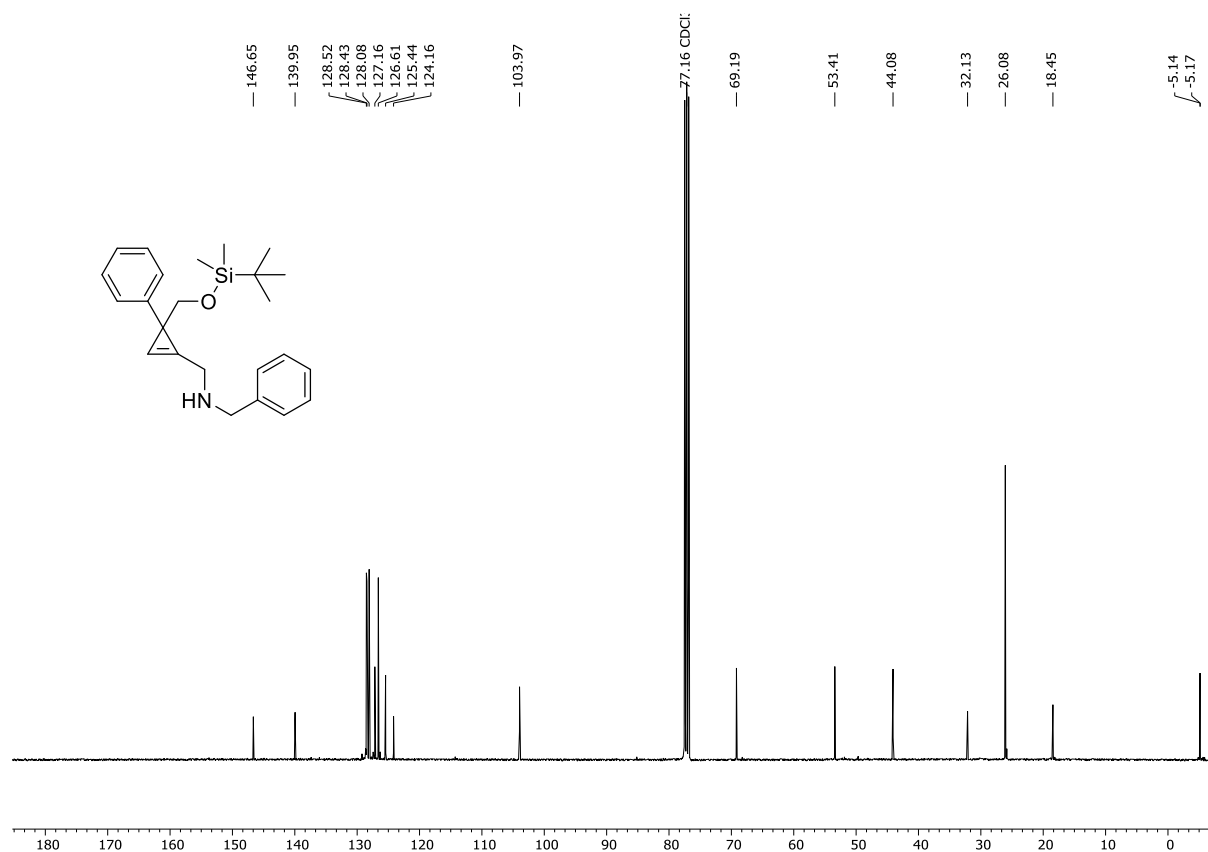

## Cyclopropane products

### $^1\text{H}$ NMR Spectrum of 6a (400 MHz, $\text{CDCl}_3$ )

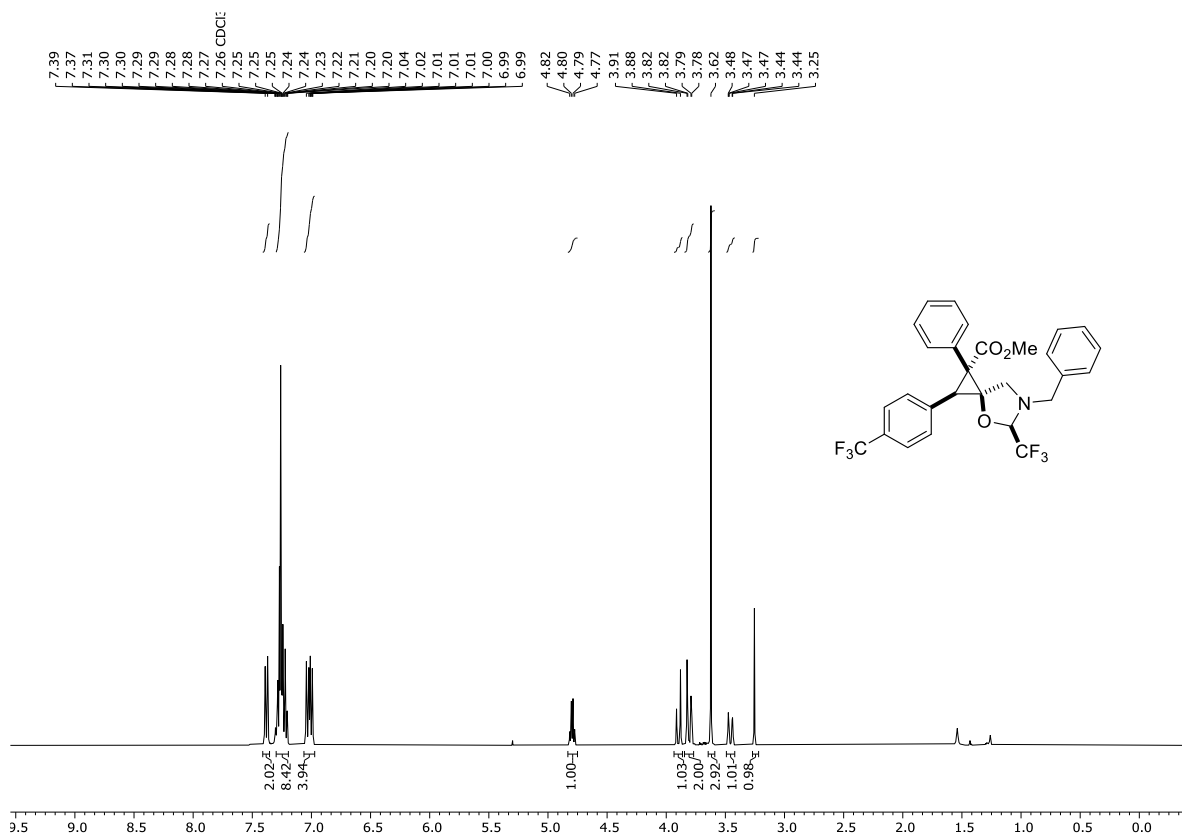

### $^{13}\text{C}$ NMR Spectrum of 6a (101 MHz, $\text{CDCl}_3$ )

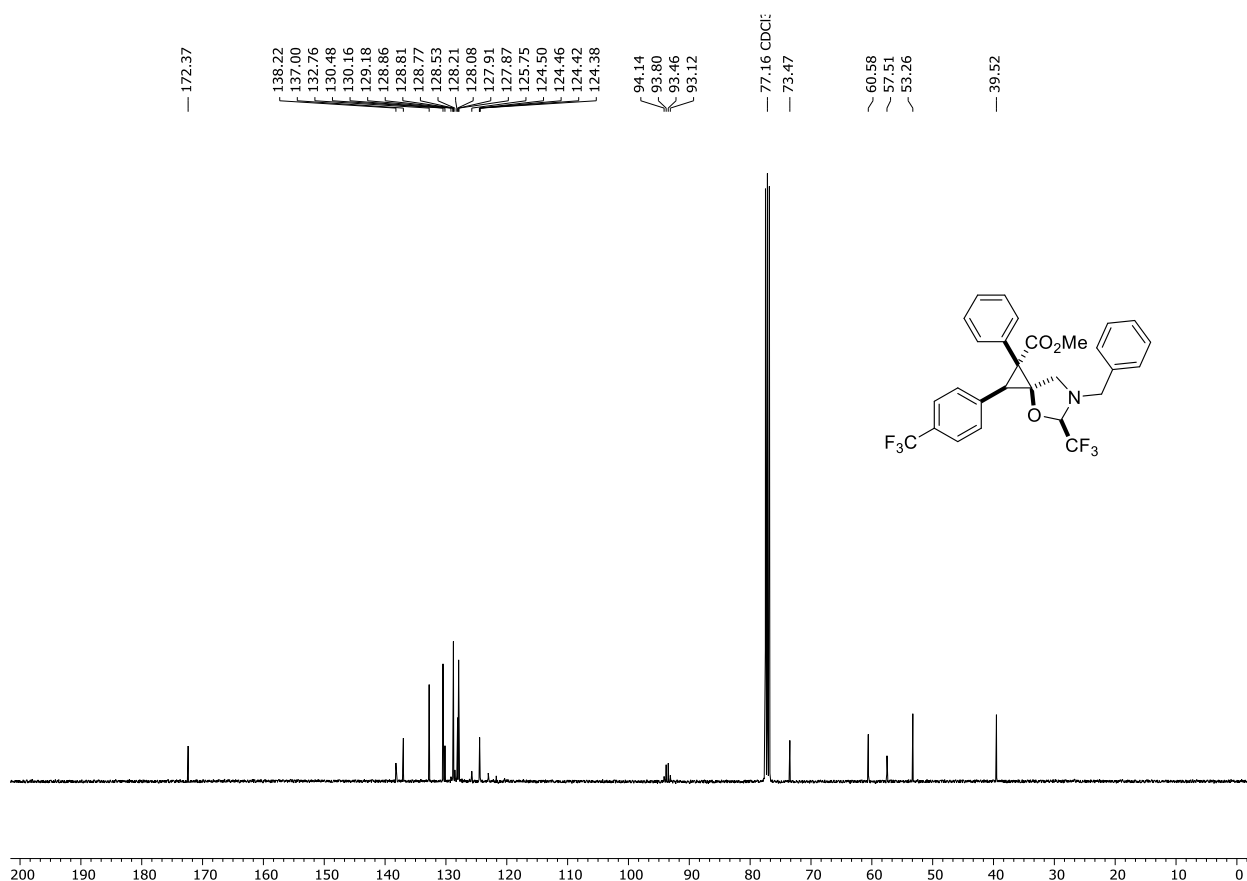



**$^{19}\text{F}$  NMR Spectrum of 6a (376 MHz,  $\text{CDCl}_3$ )**

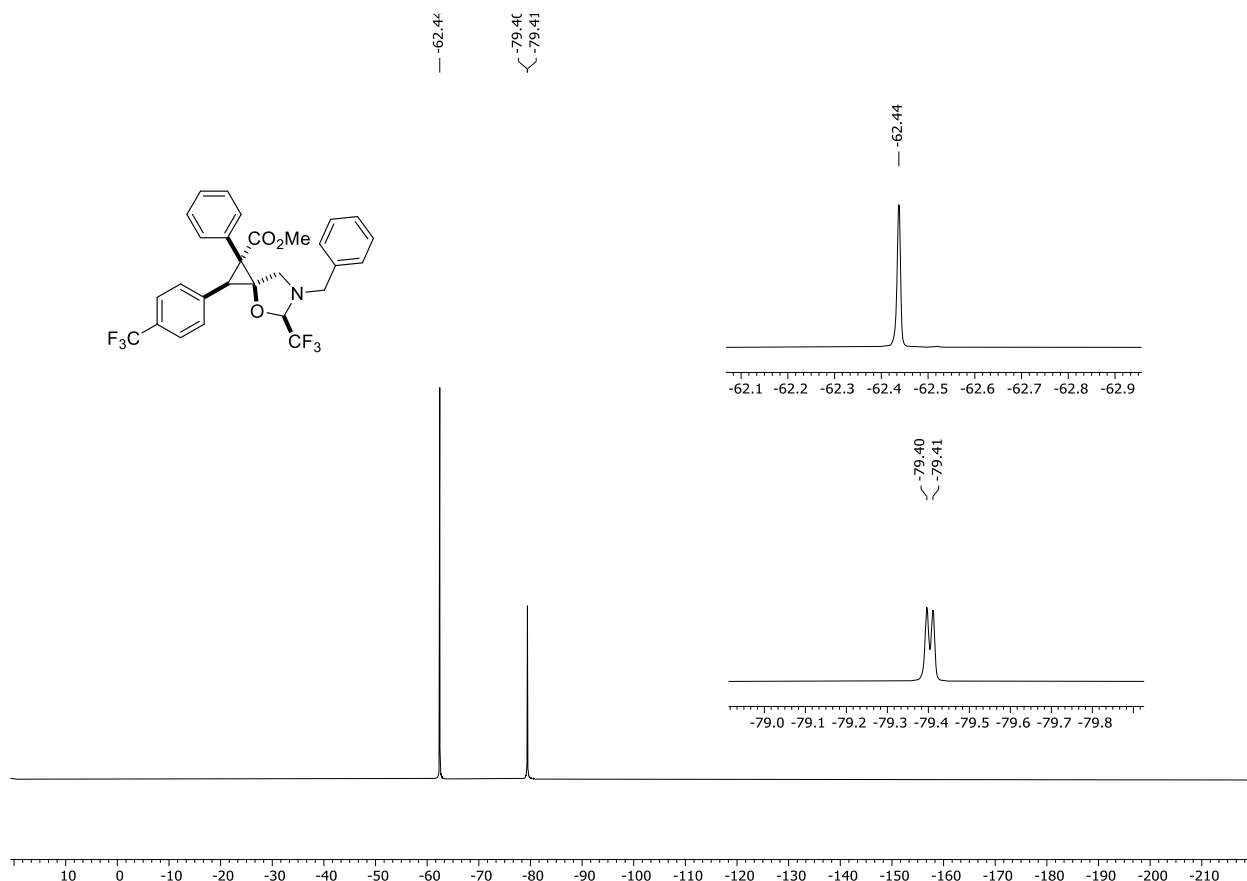

**$^1\text{H}$  NMR Spectrum of 6b (400 MHz,  $\text{CDCl}_3$ )**

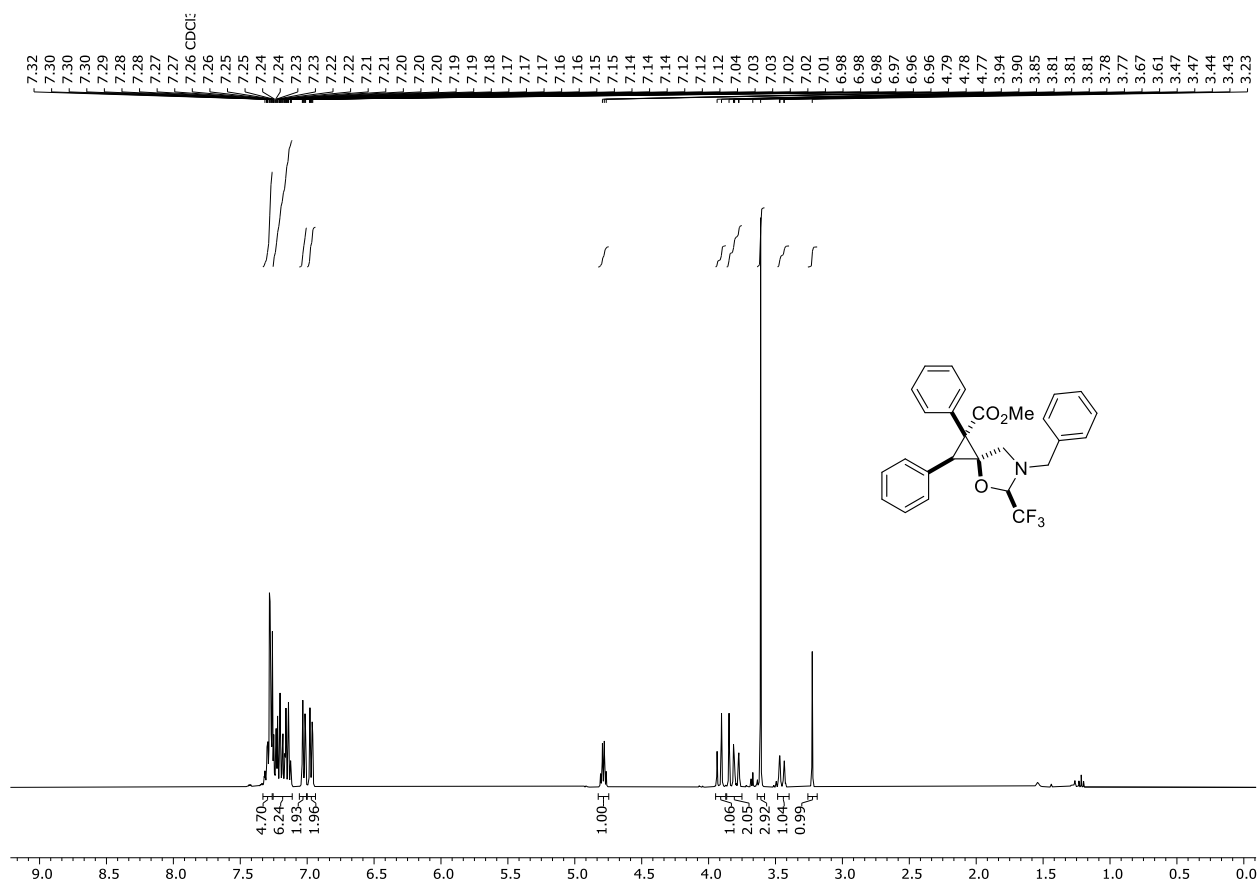

**$^{13}\text{C}$  NMR Spectrum of 6b (101 MHz,  $\text{CDCl}_3$ )**

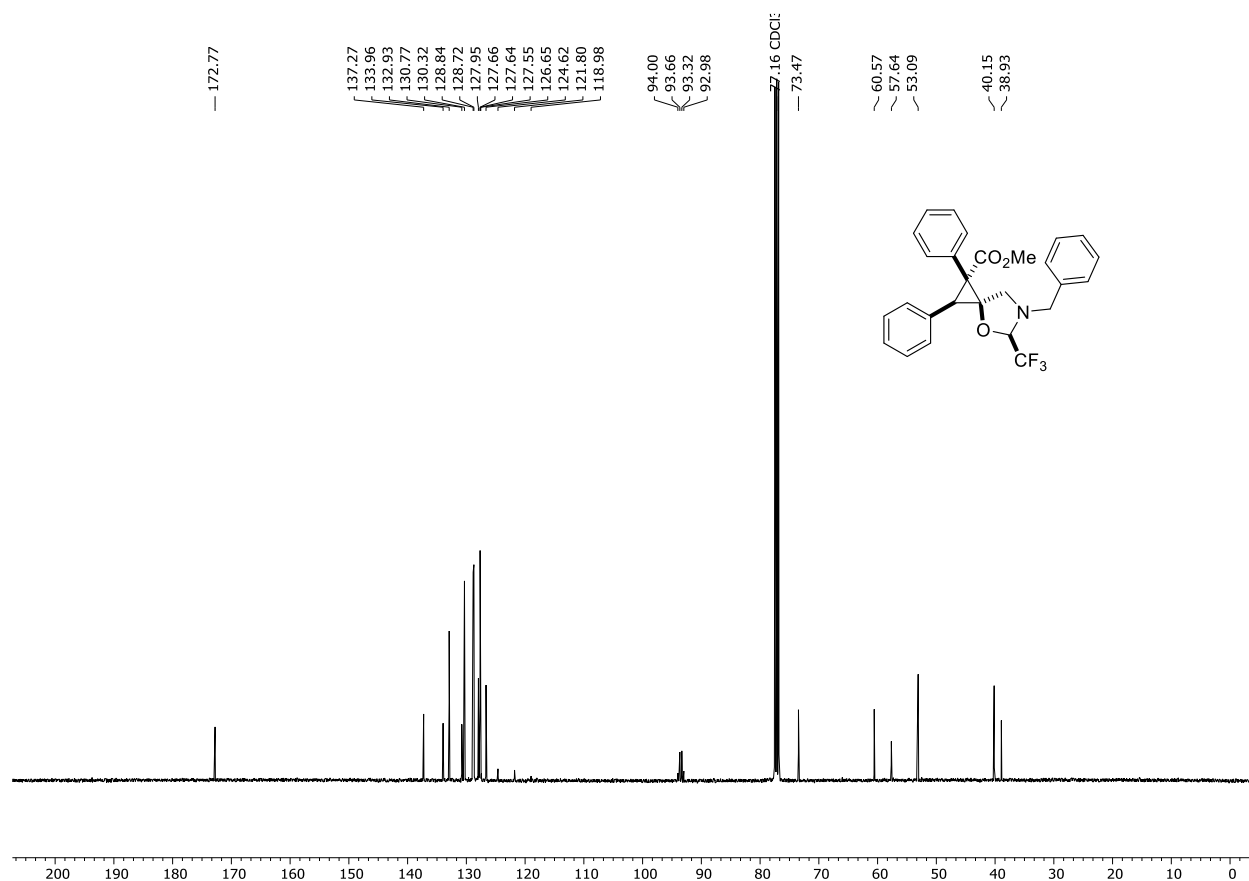

**$^{19}\text{F}$  NMR Spectrum of 6b (376 MHz,  $\text{CDCl}_3$ )**

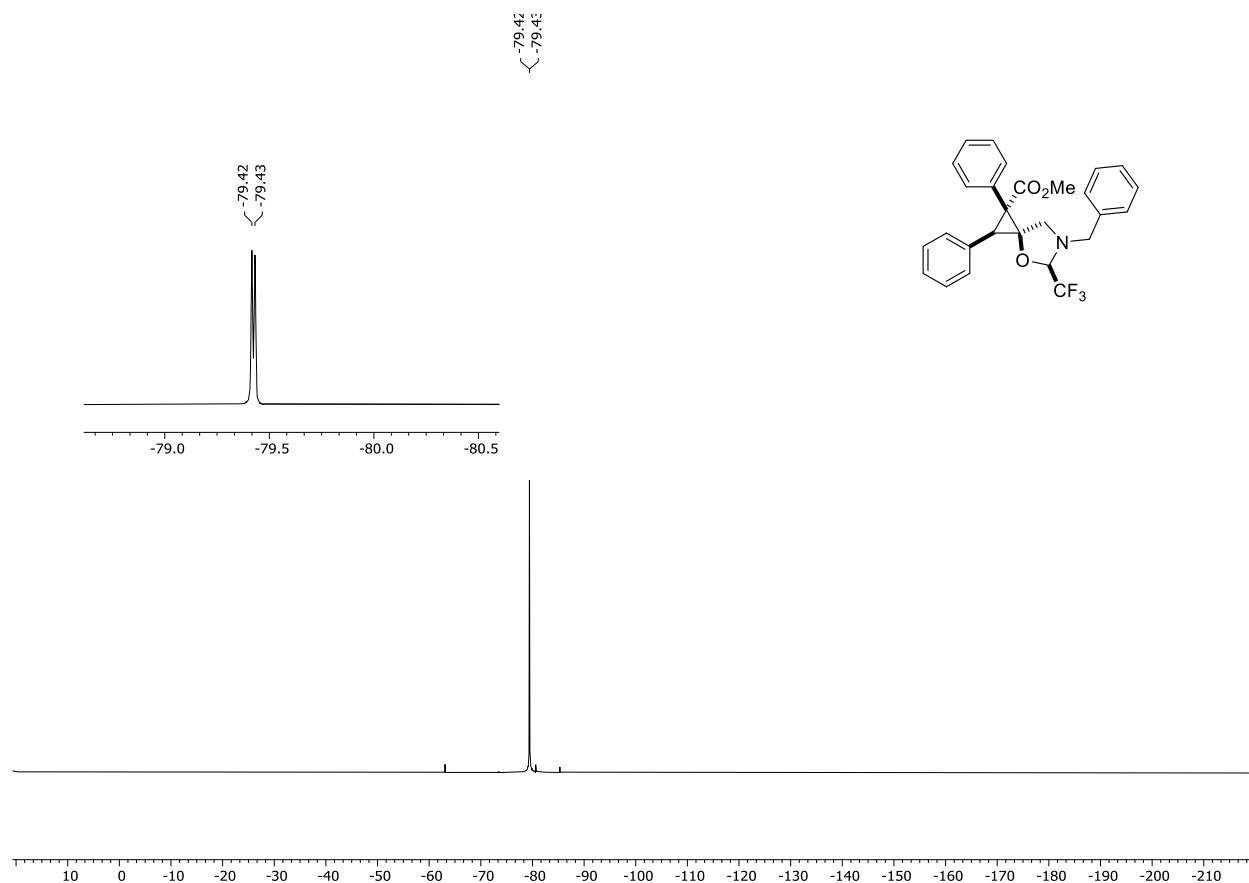

**<sup>1</sup>H NMR Spectrum of 6c (400 MHz, CDCl<sub>3</sub>)**

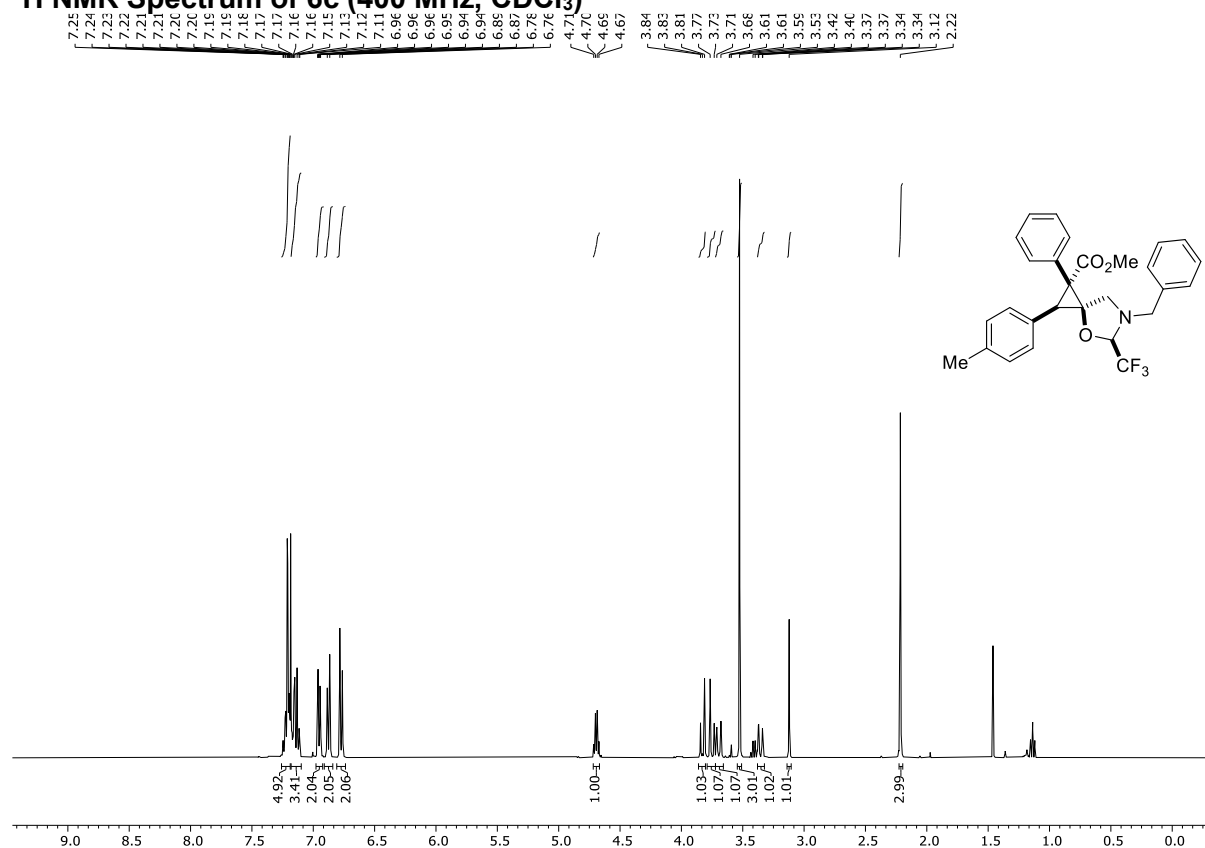

**<sup>13</sup>C NMR Spectrum of 6c (101 MHz, CDCl<sub>3</sub>)**

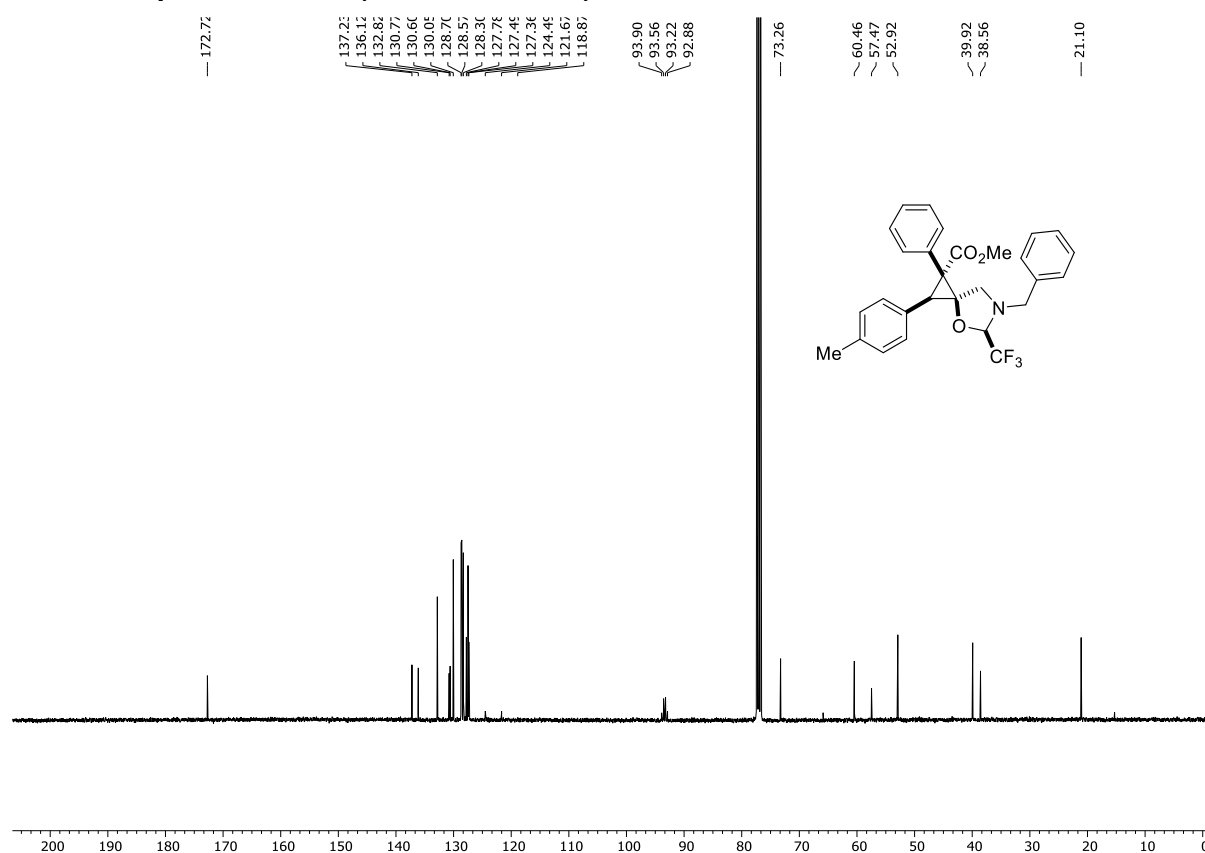

**<sup>19</sup>F NMR Spectrum of 6c (376 MHz, CDCl<sub>3</sub>)**

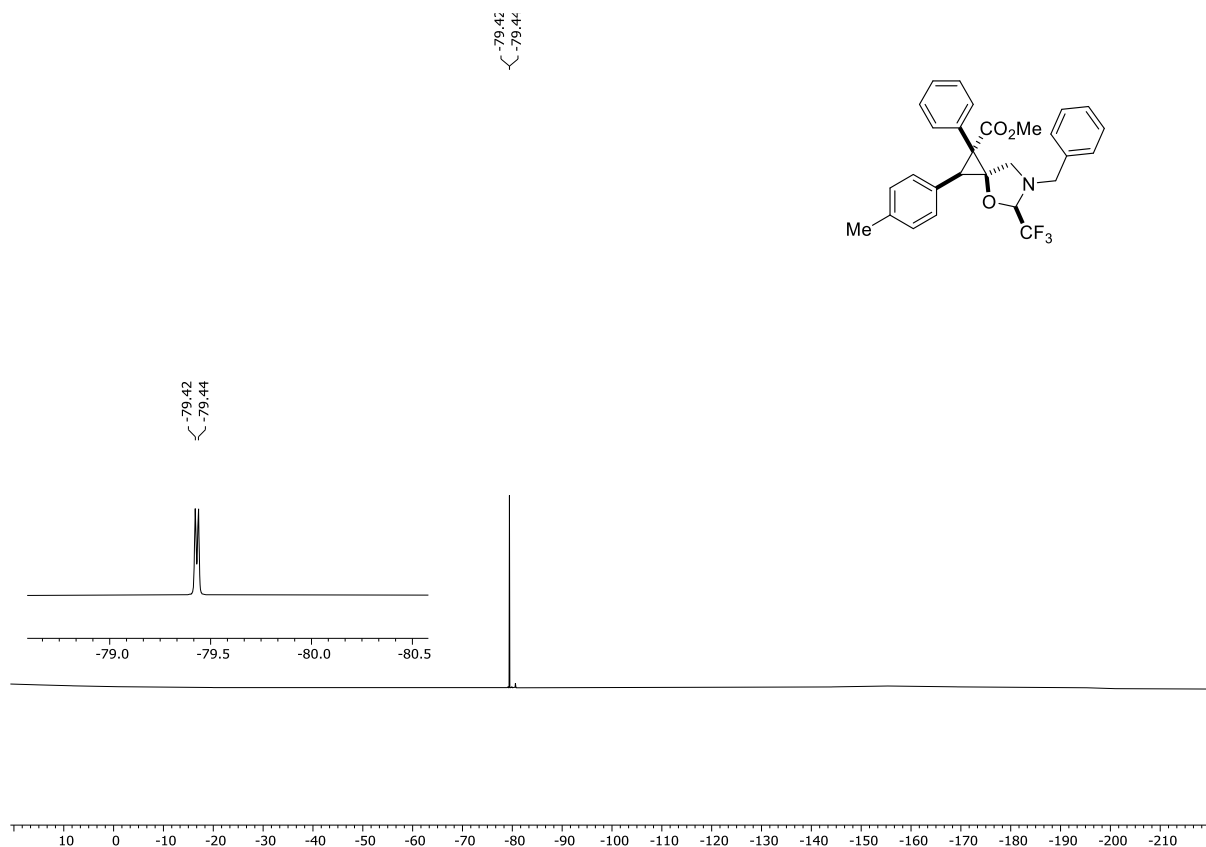

### <sup>1</sup>H NMR Spectrum of 6d (400 MHz, CDCl<sub>3</sub>)

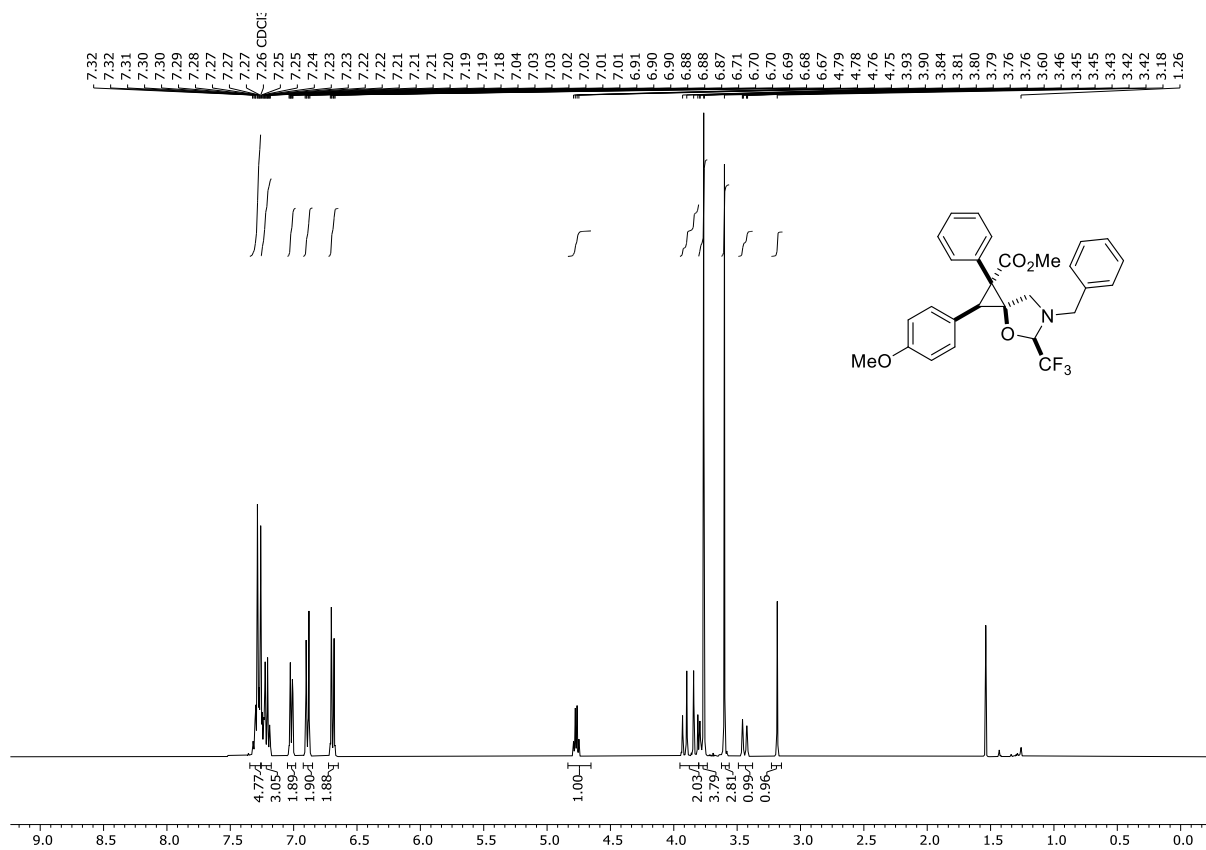

### <sup>13</sup>C NMR Spectrum of 6d (101 MHz, CDCl<sub>3</sub>)

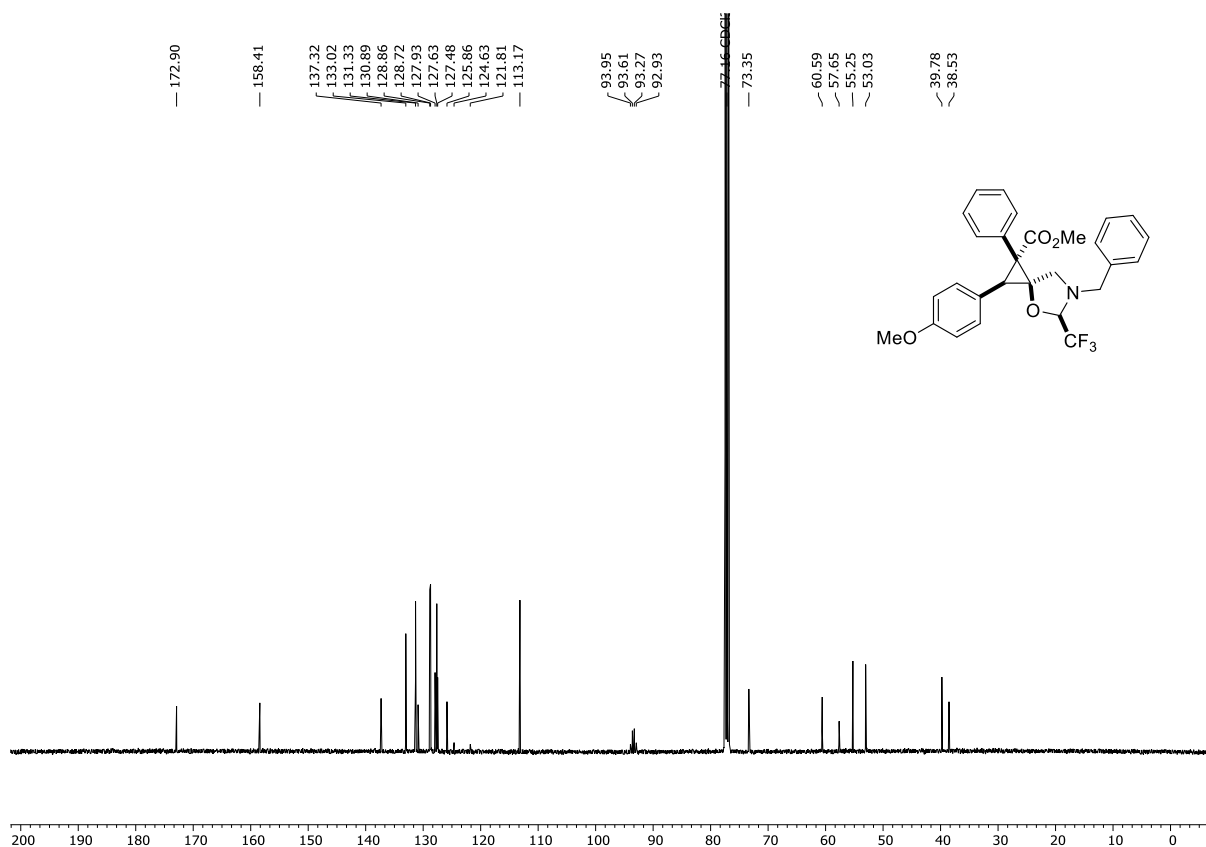

**<sup>19</sup>F NMR Spectrum of 6d (376 MHz, CDCl<sub>3</sub>)**

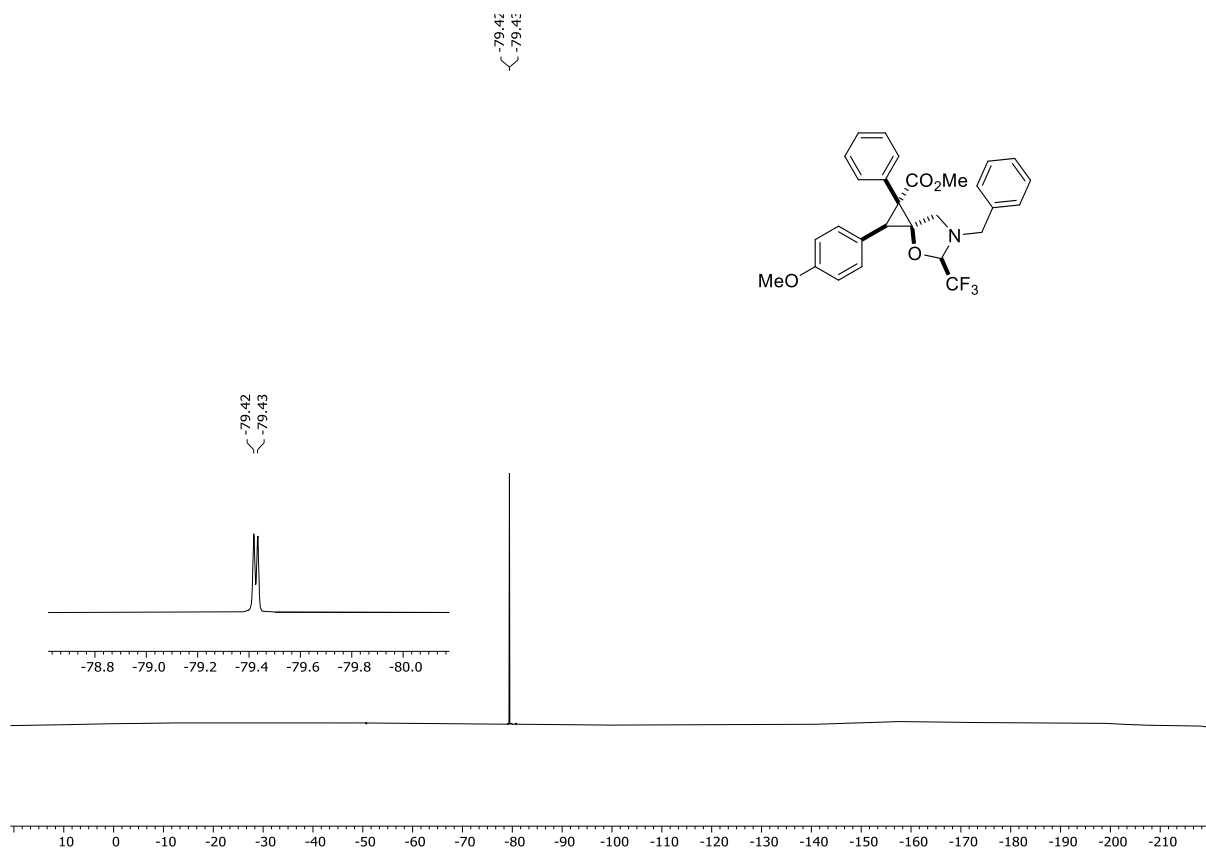

**<sup>1</sup>H NMR Spectrum of 6e (400 MHz, CDCl<sub>3</sub>)**

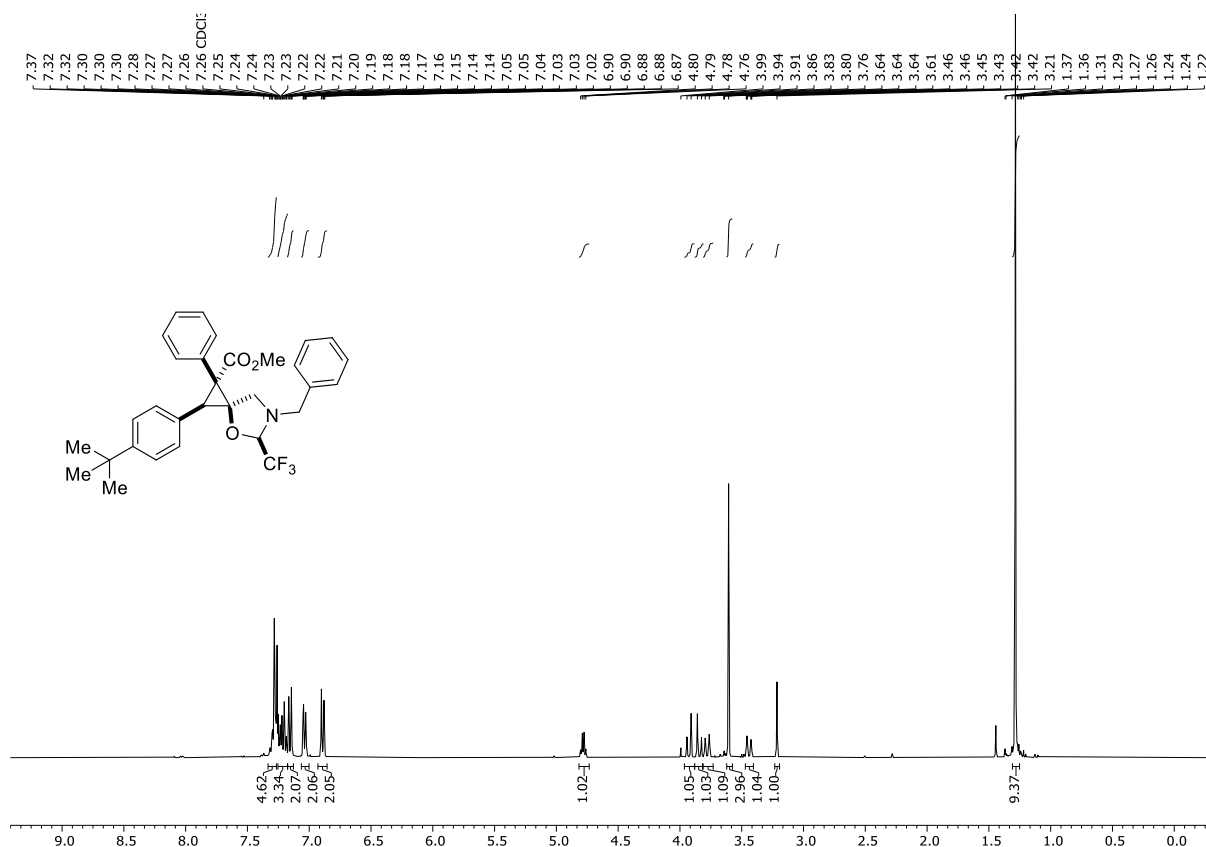

**<sup>13</sup>C NMR Spectrum of 6e (101 MHz, CDCl<sub>3</sub>)**

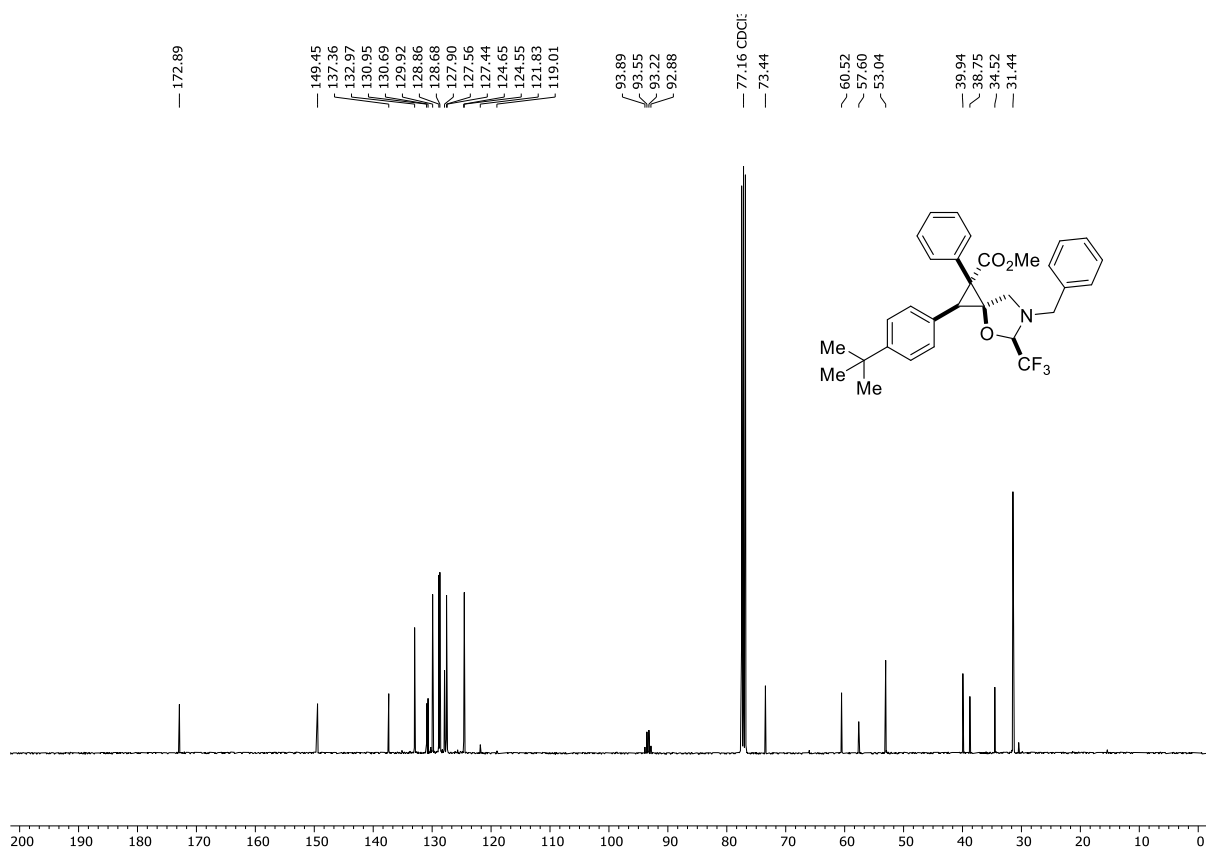

**<sup>19</sup>F NMR Spectrum of 6e (376 MHz, CDCl<sub>3</sub>)**

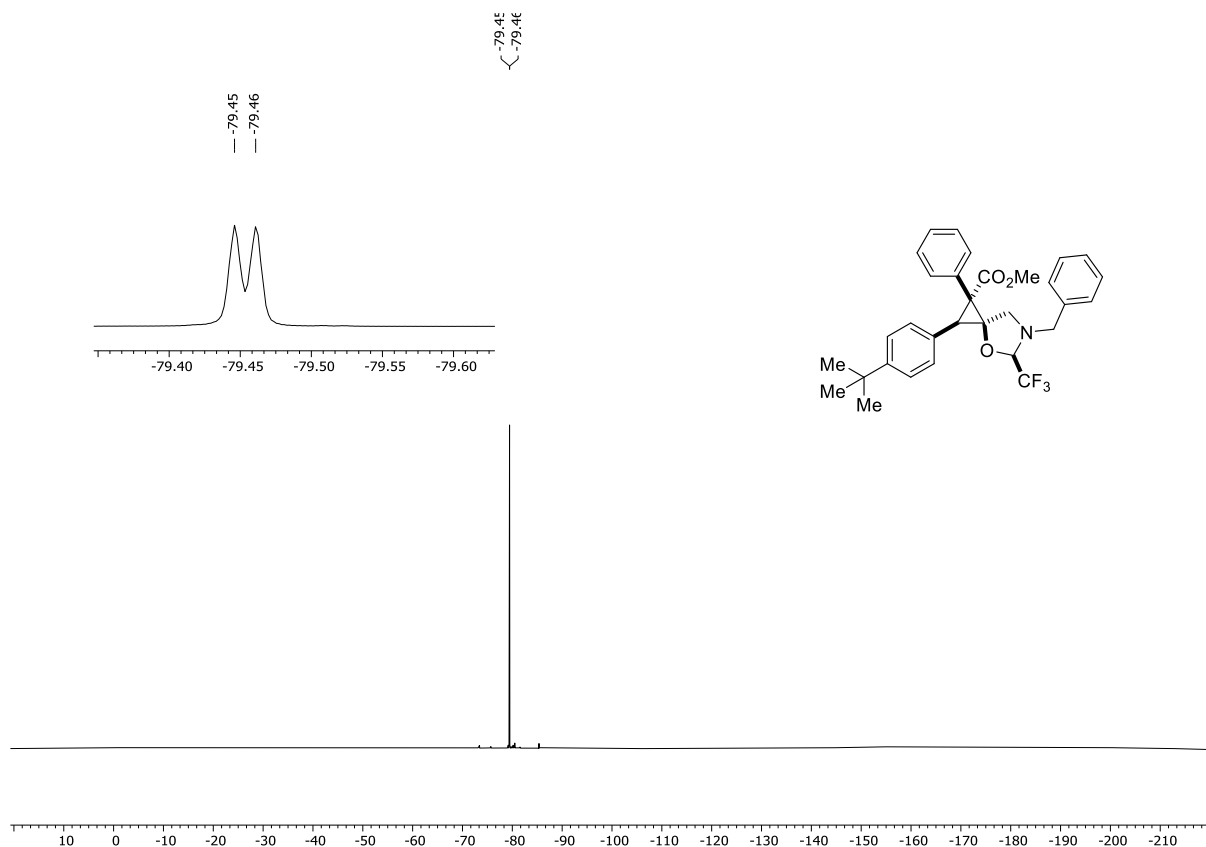

**<sup>1</sup>H NMR Spectrum of 6f (400 MHz, CDCl<sub>3</sub>)**

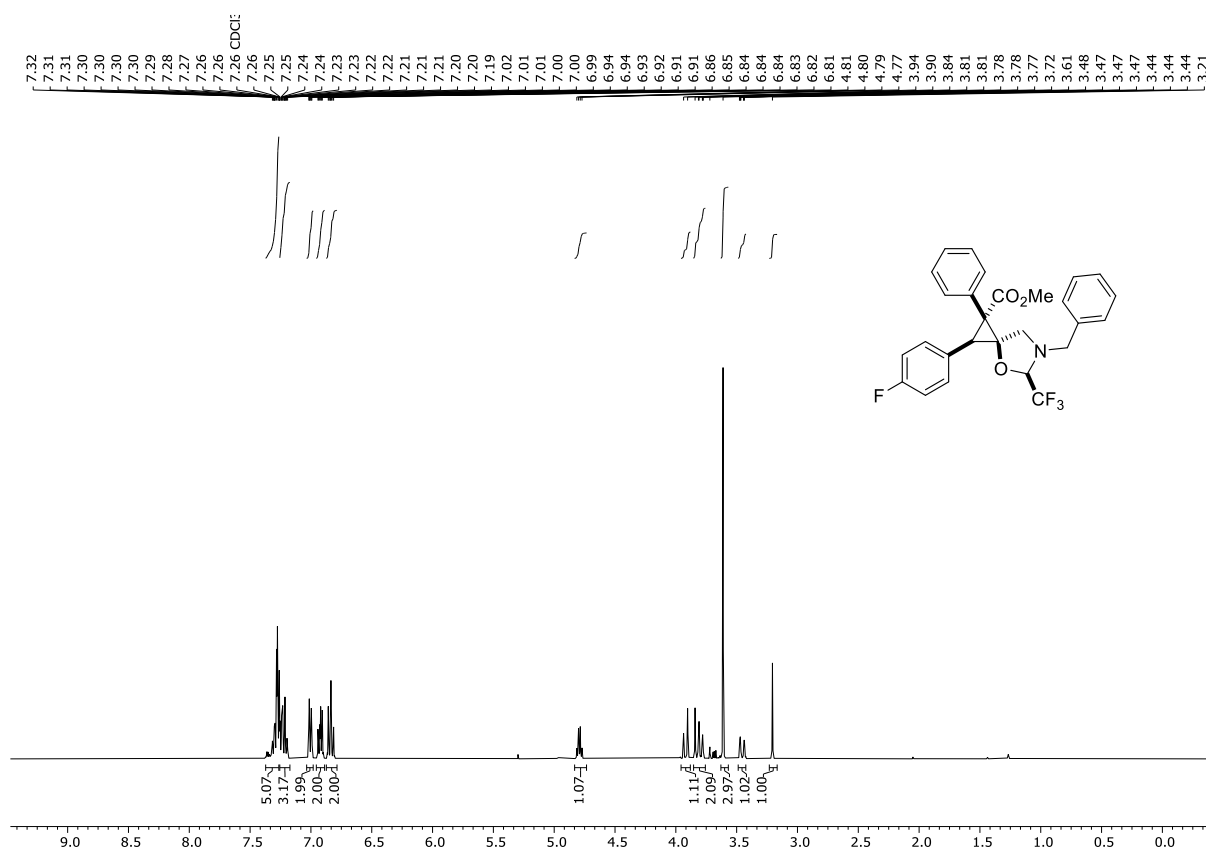

**<sup>13</sup>C NMR Spectrum of 6f (101 MHz, CDCl<sub>3</sub>)**

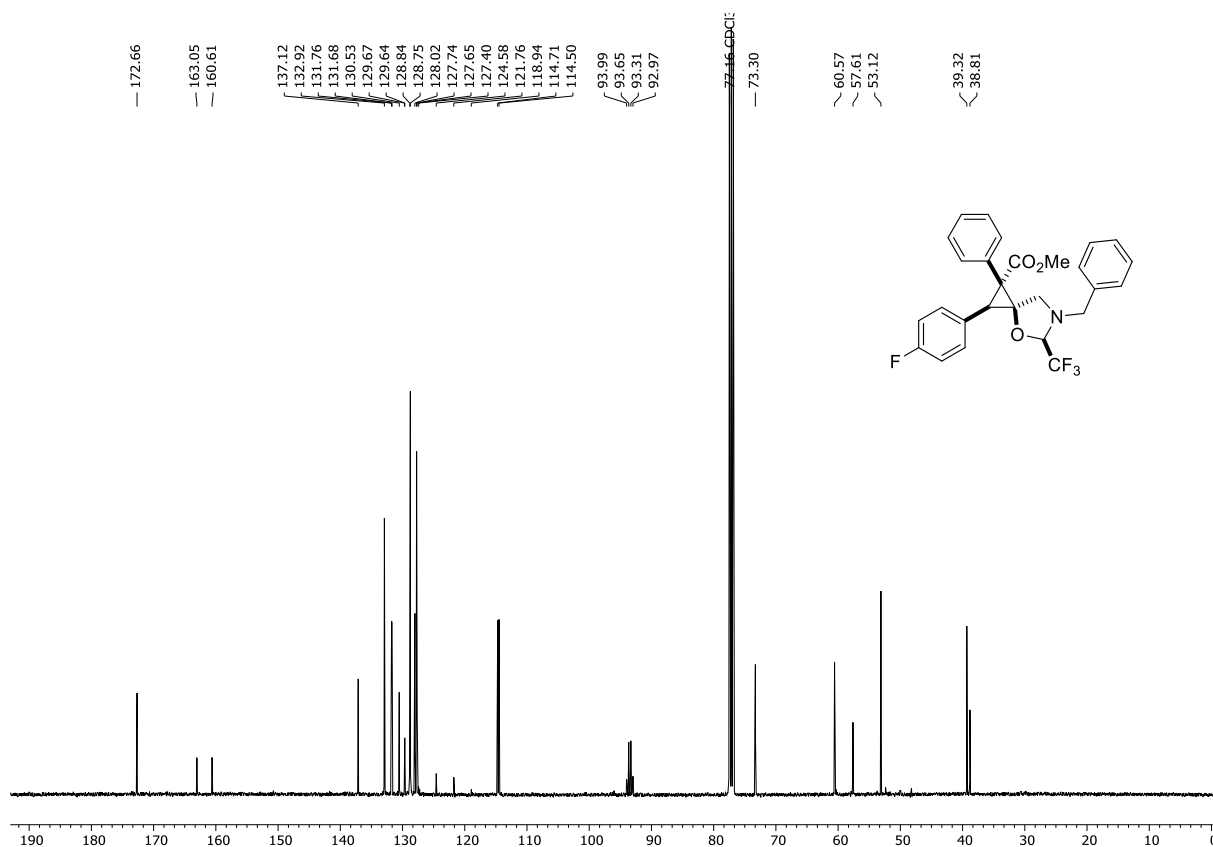

### <sup>19</sup>F NMR Spectrum of 6f (376 MHz, CDCl<sub>3</sub>)

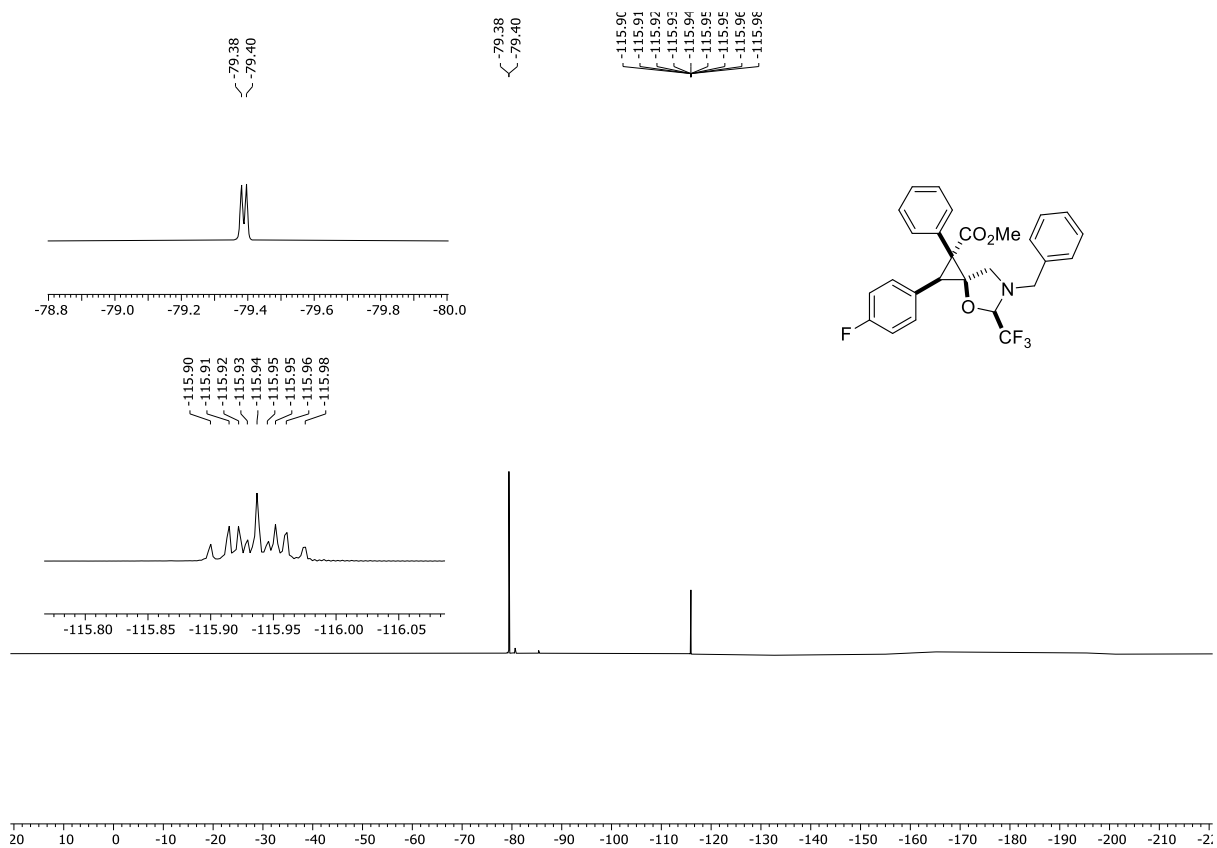

### <sup>1</sup>H NMR Spectrum of 6g (400 MHz, CDCl<sub>3</sub>)



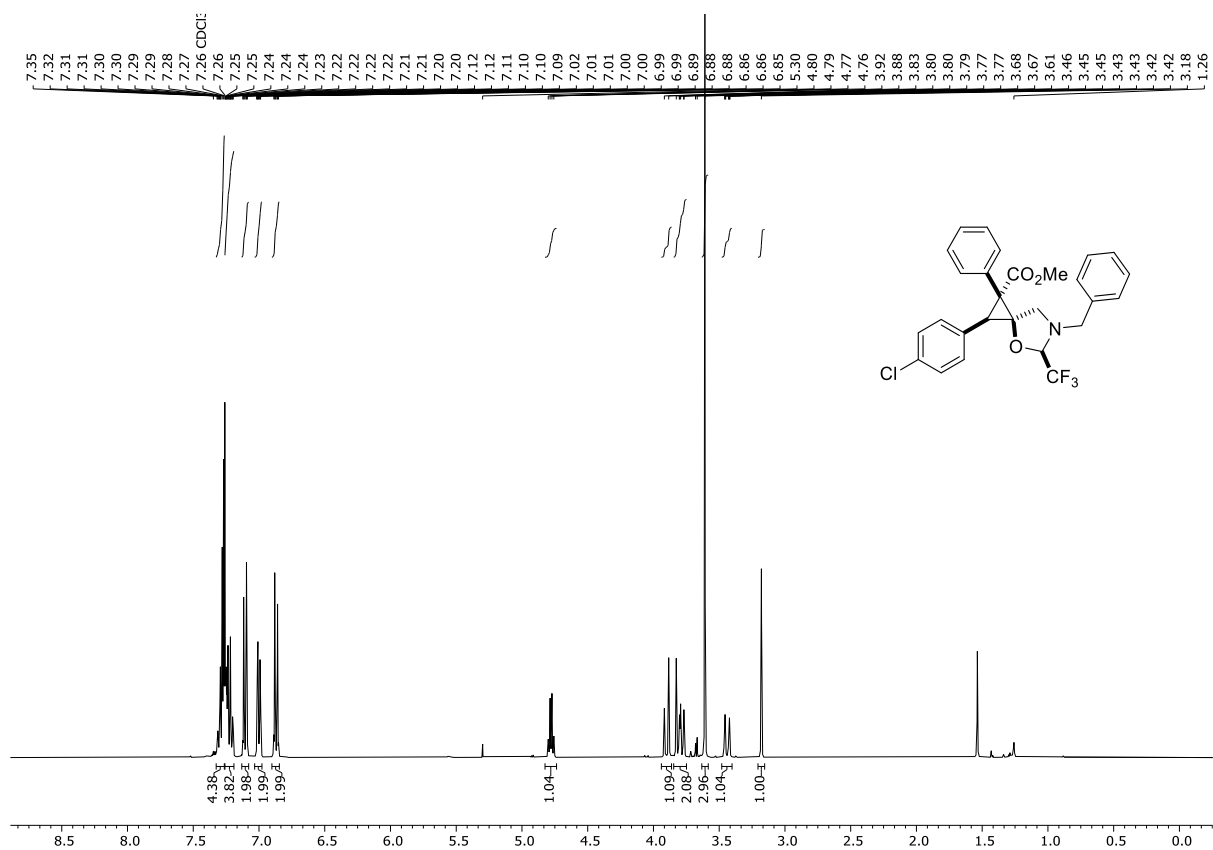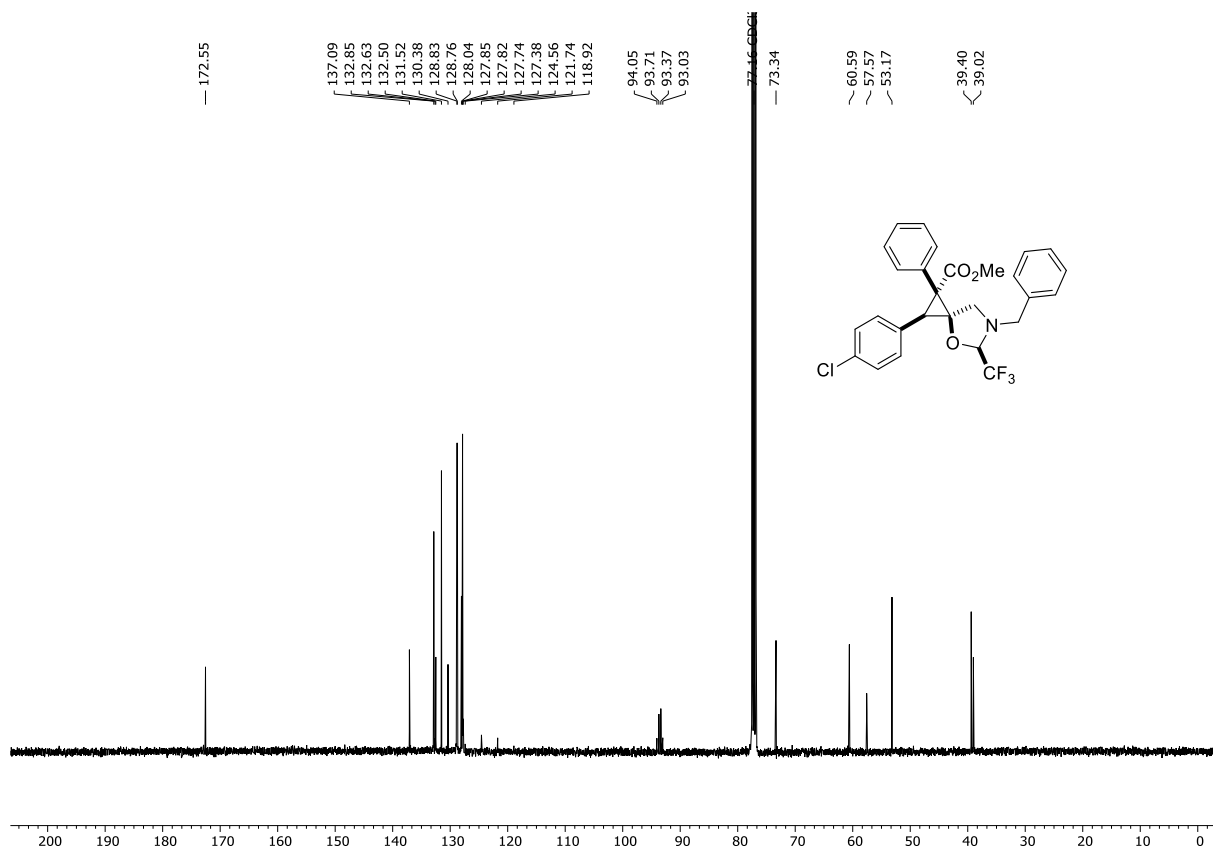

**$^{19}\text{F}$  NMR Spectrum of 6g (376 MHz,  $\text{CDCl}_3$ )**

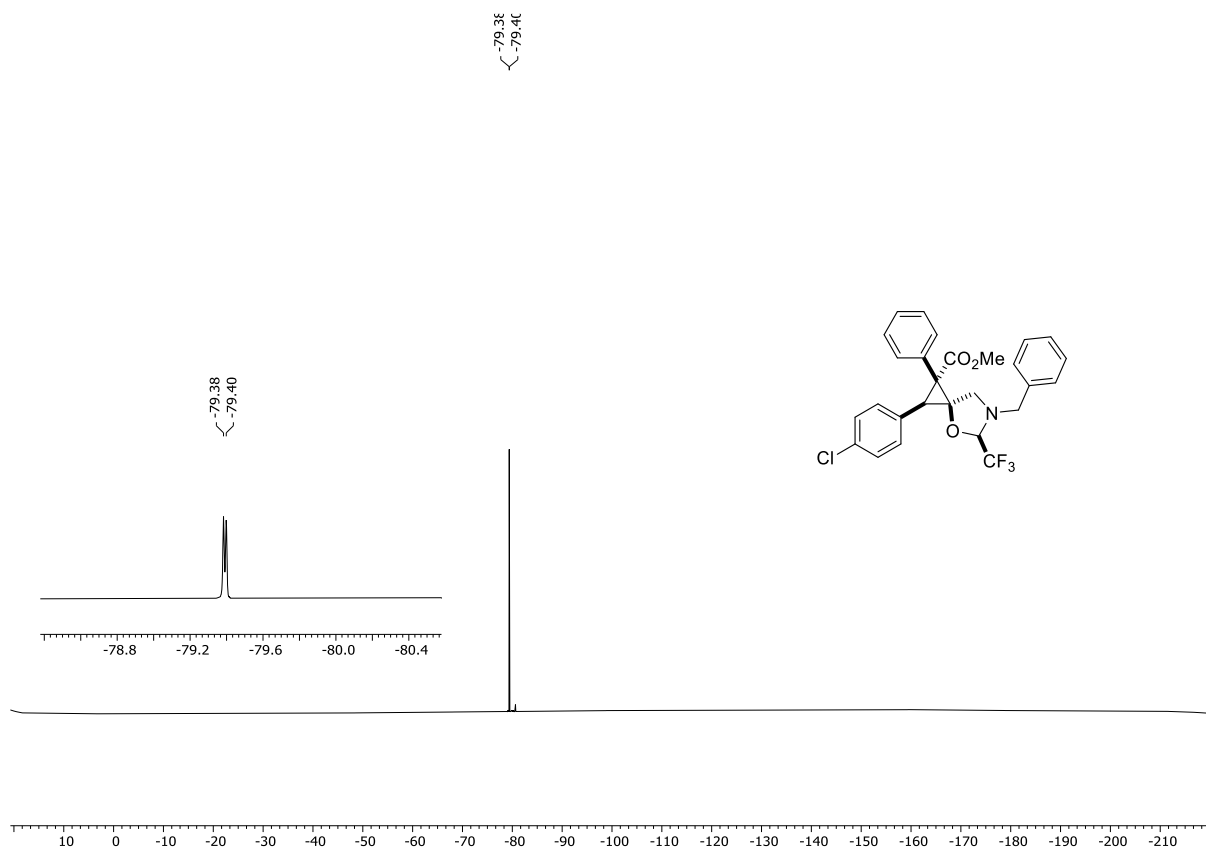

**$^1\text{H}$  NMR Spectrum of 497 6h (400 MHz,  $\text{CDCl}_3$ )**

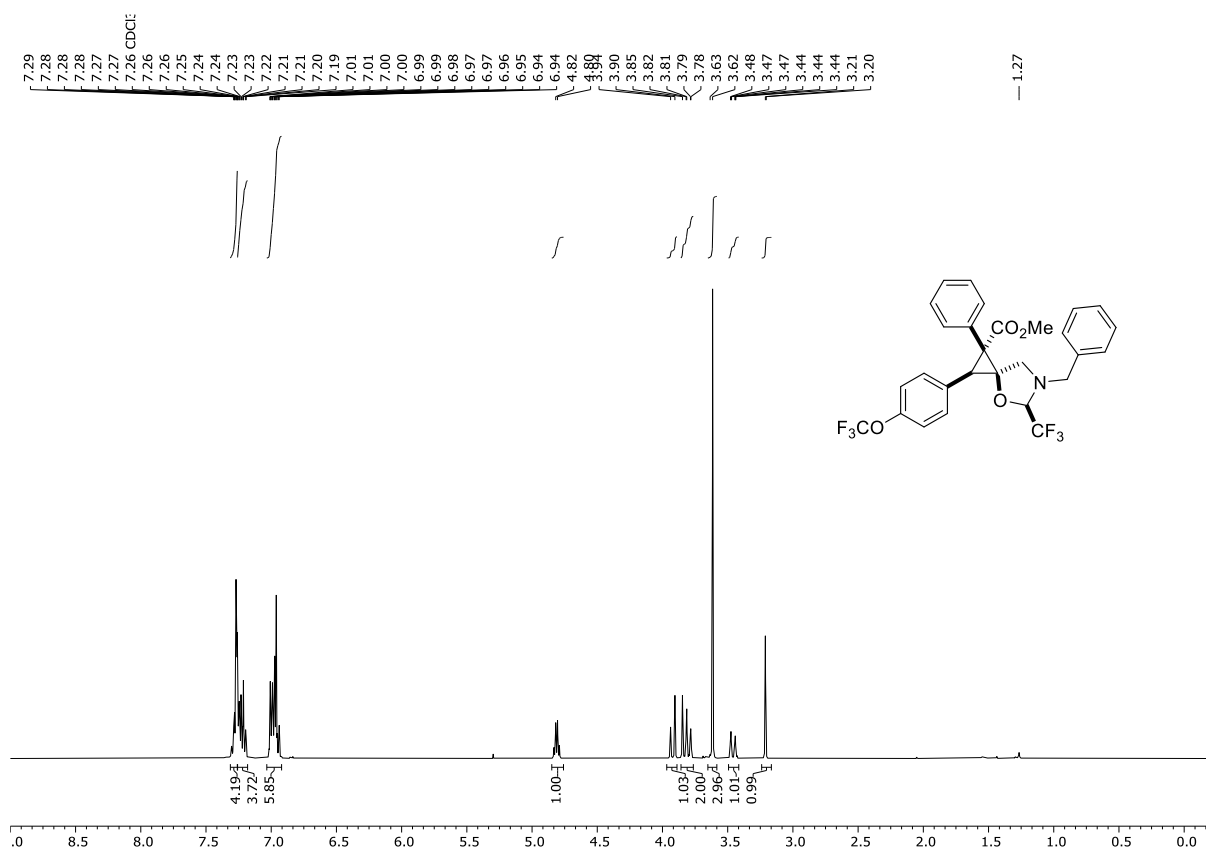

**$^{13}\text{C}$  NMR Spectrum of 6h (101 MHz,  $\text{CDCl}_3$ )**

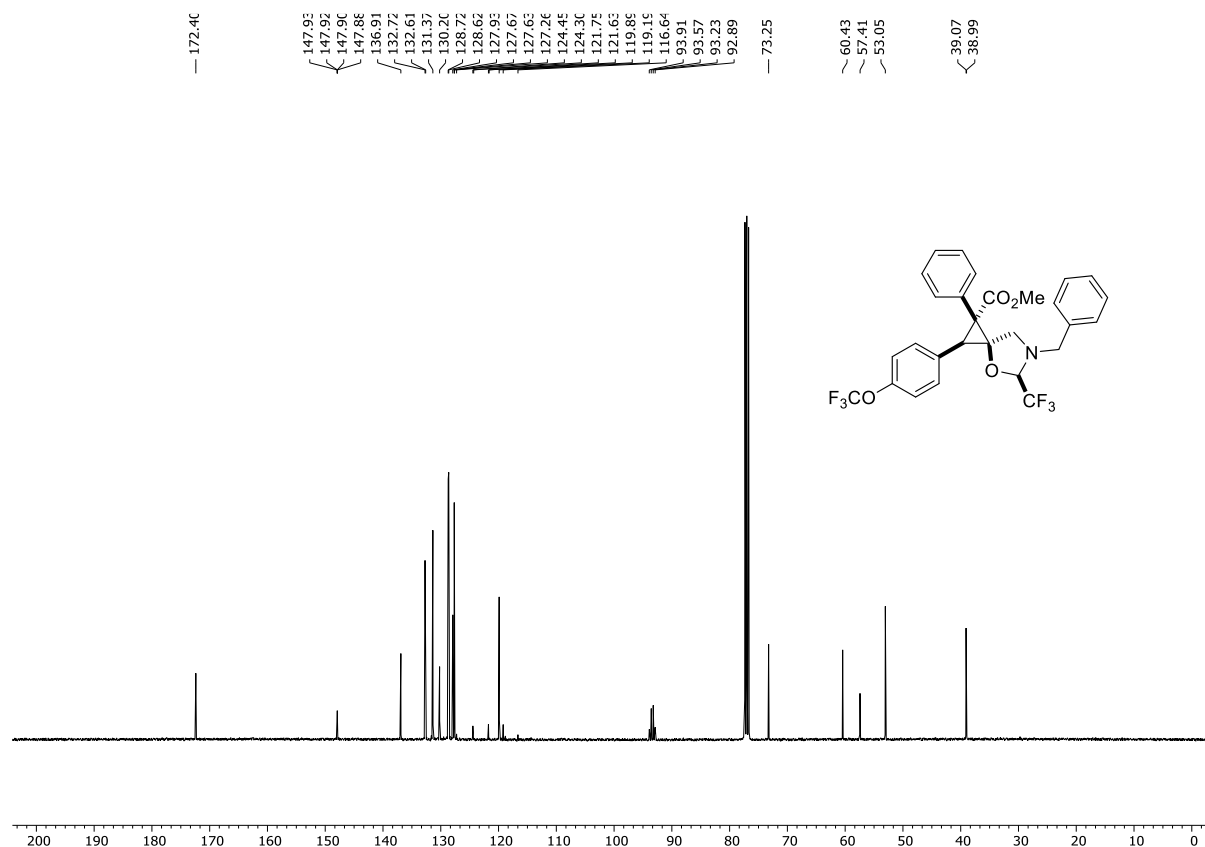

**$^{19}\text{F}$  NMR Spectrum of 6h (376 MHz,  $\text{CDCl}_3$ )**

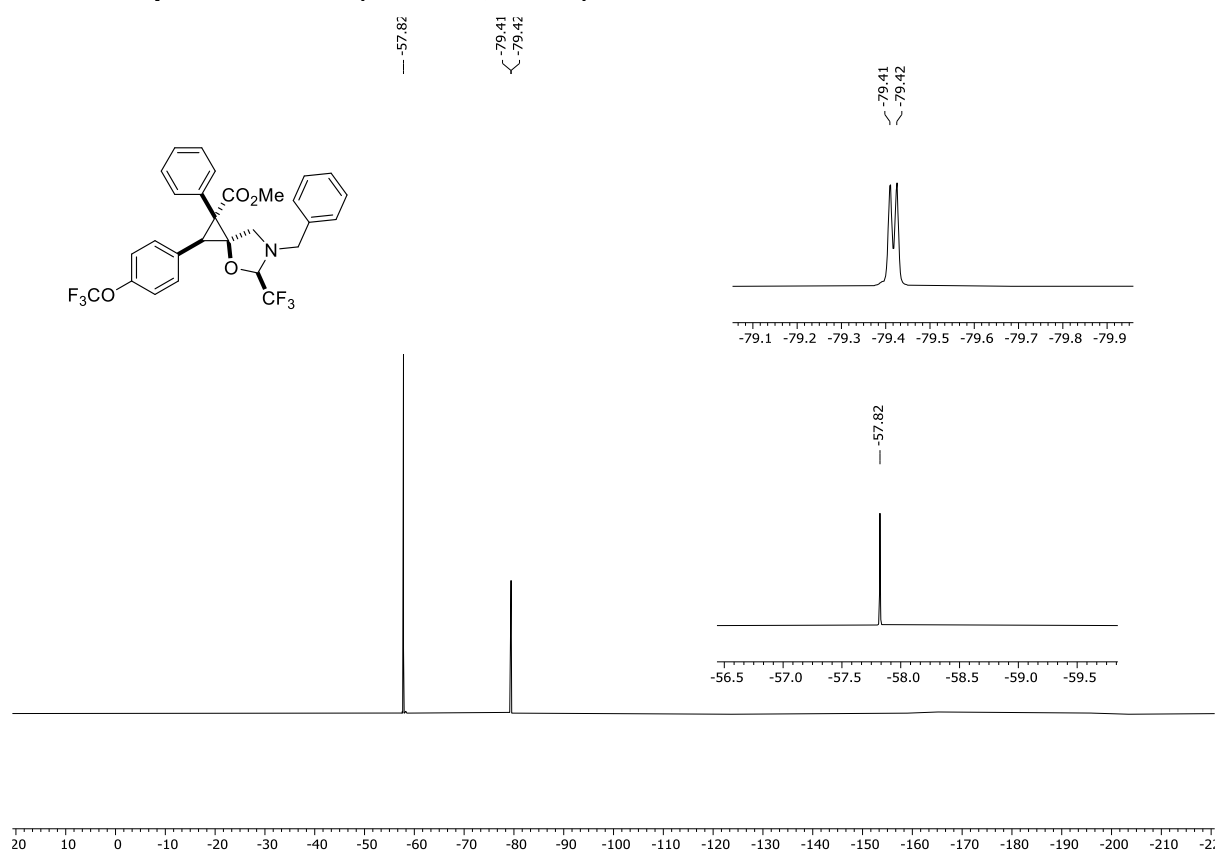

**<sup>1</sup>H NMR Spectrum of 450 6i (400 MHz, CDCl<sub>3</sub>)**

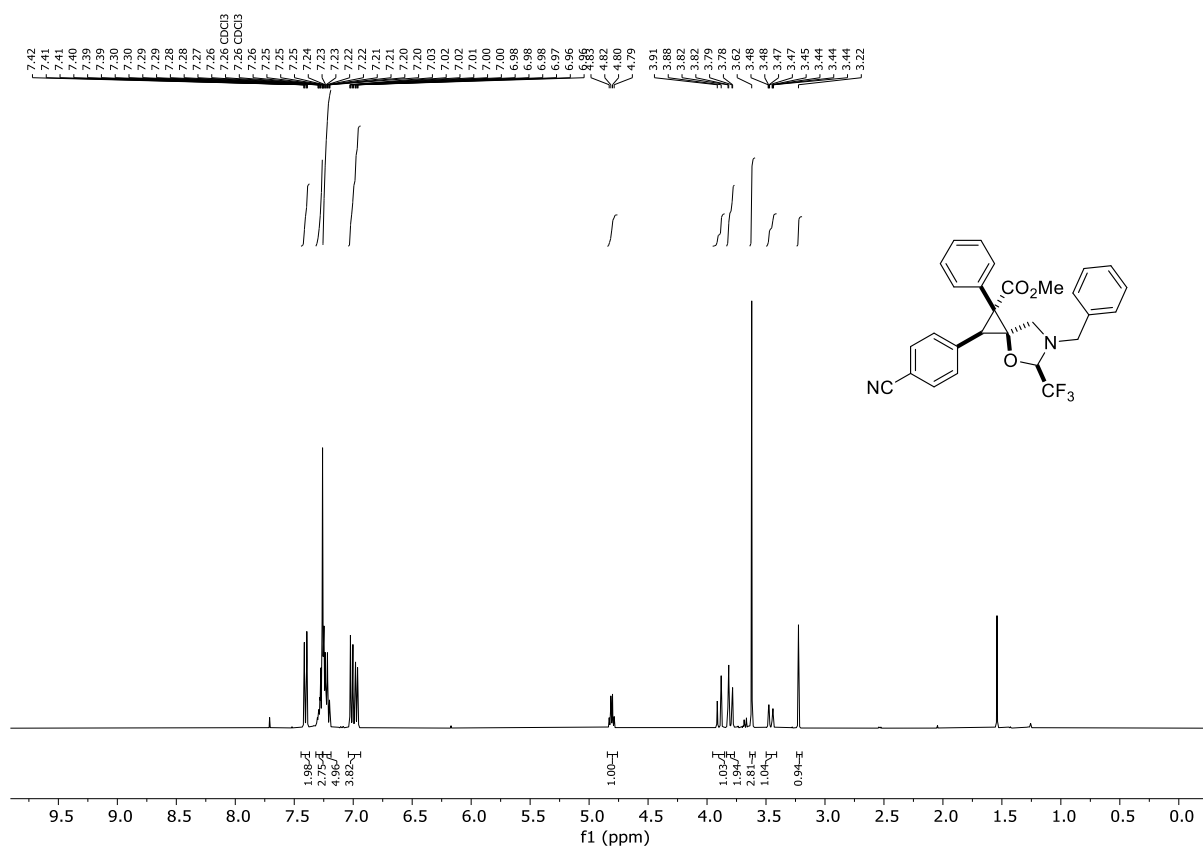

**<sup>13</sup>C NMR Spectrum of 6i (101 MHz, CDCl<sub>3</sub>)**

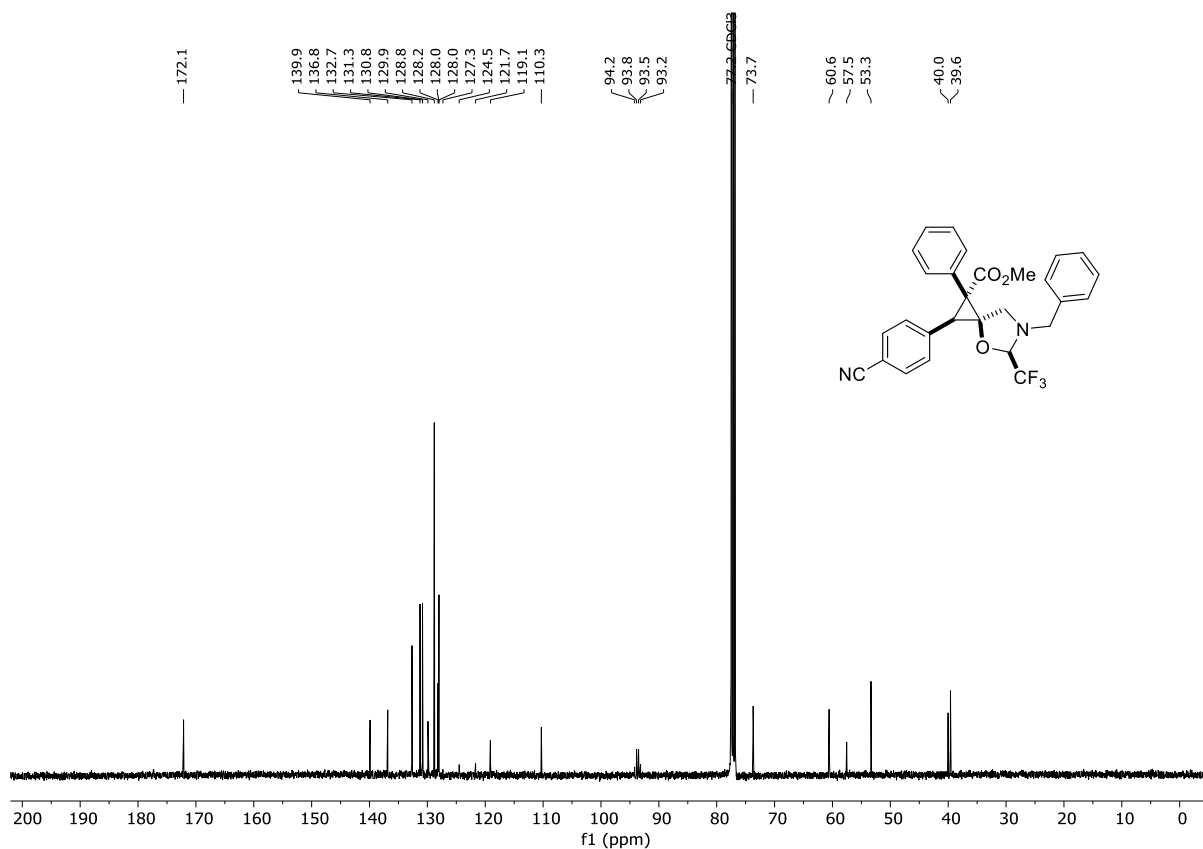

**<sup>19</sup>F NMR Spectrum of 6i (376 MHz, CDCl<sub>3</sub>)**

DKB-01-450.15.fid

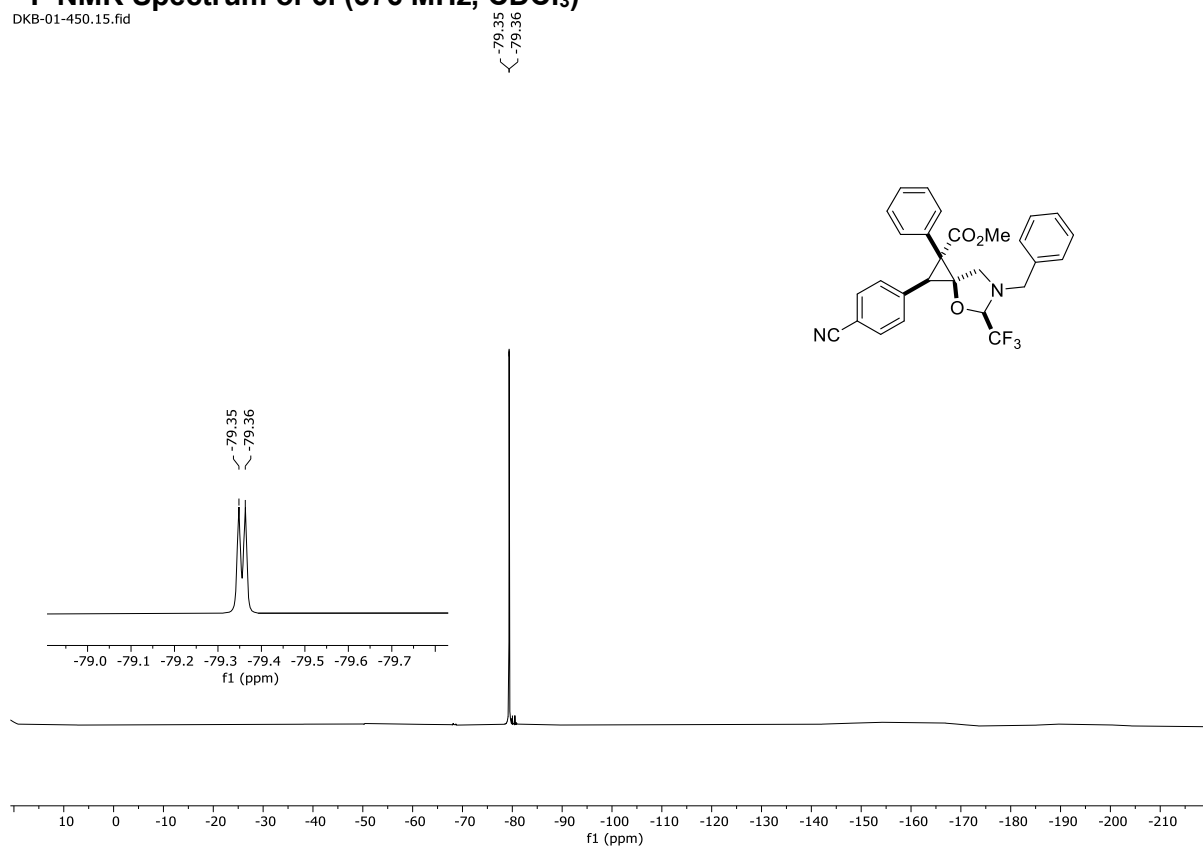

**<sup>1</sup>H NMR Spectrum of 521 6j (400 MHz, CDCl<sub>3</sub>)**

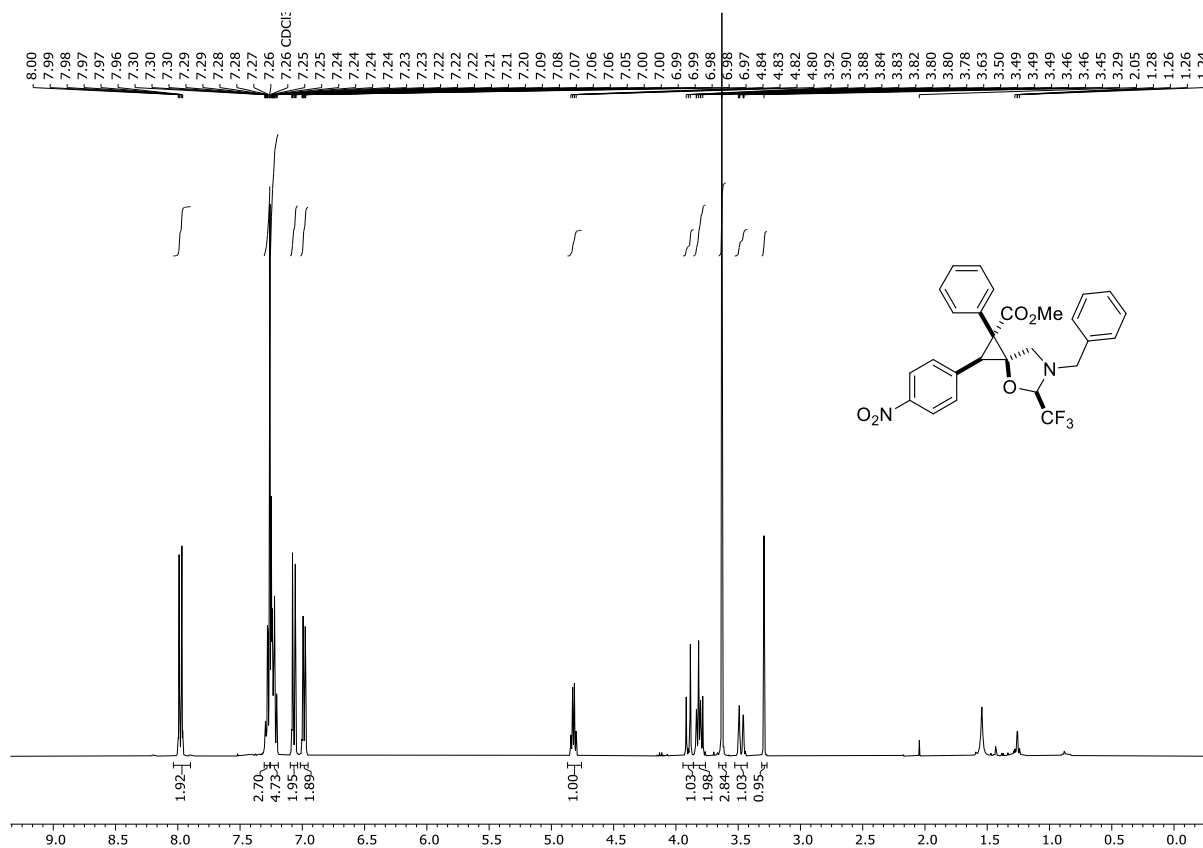

**$^{13}\text{C}$  NMR Spectrum of 6j (101 MHz,  $\text{CDCl}_3$ )**

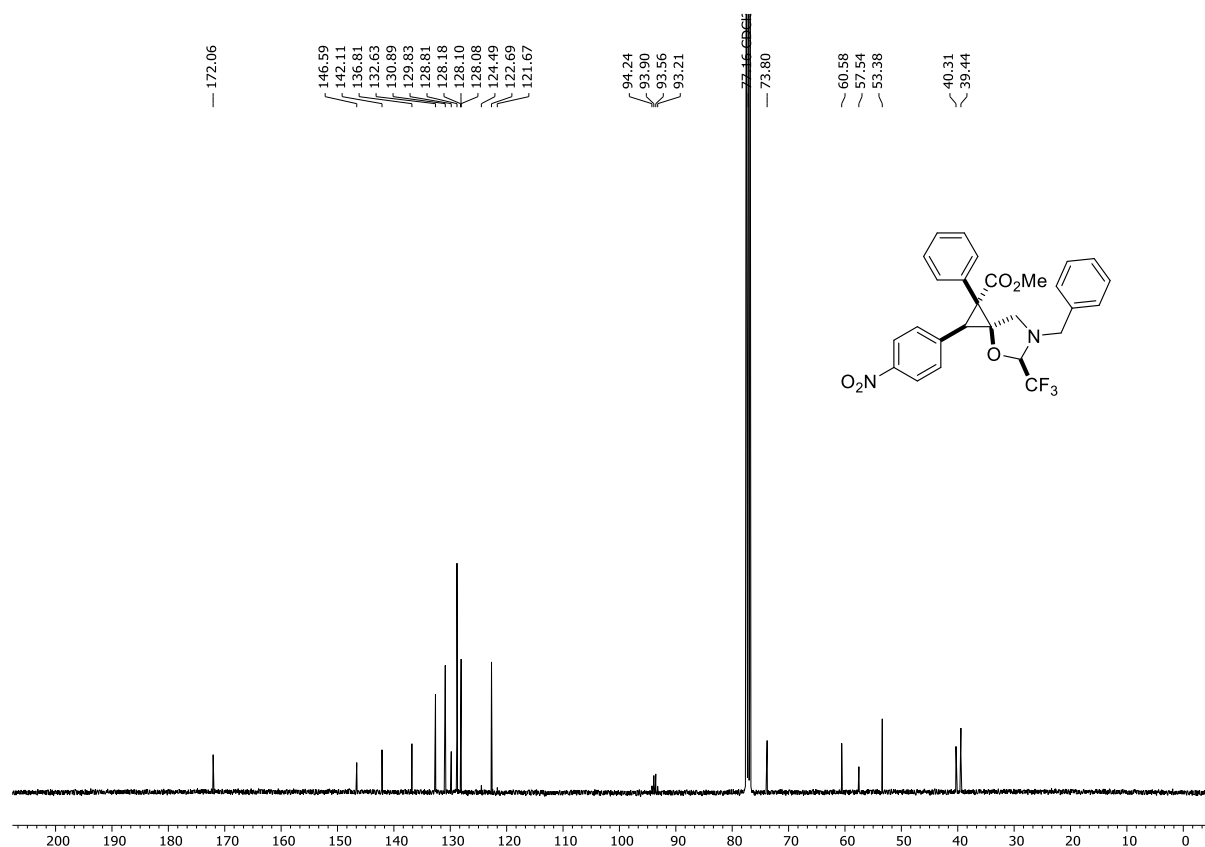

**$^{19}\text{F}$  NMR Spectrum of 6j (376 MHz,  $\text{CDCl}_3$ )**

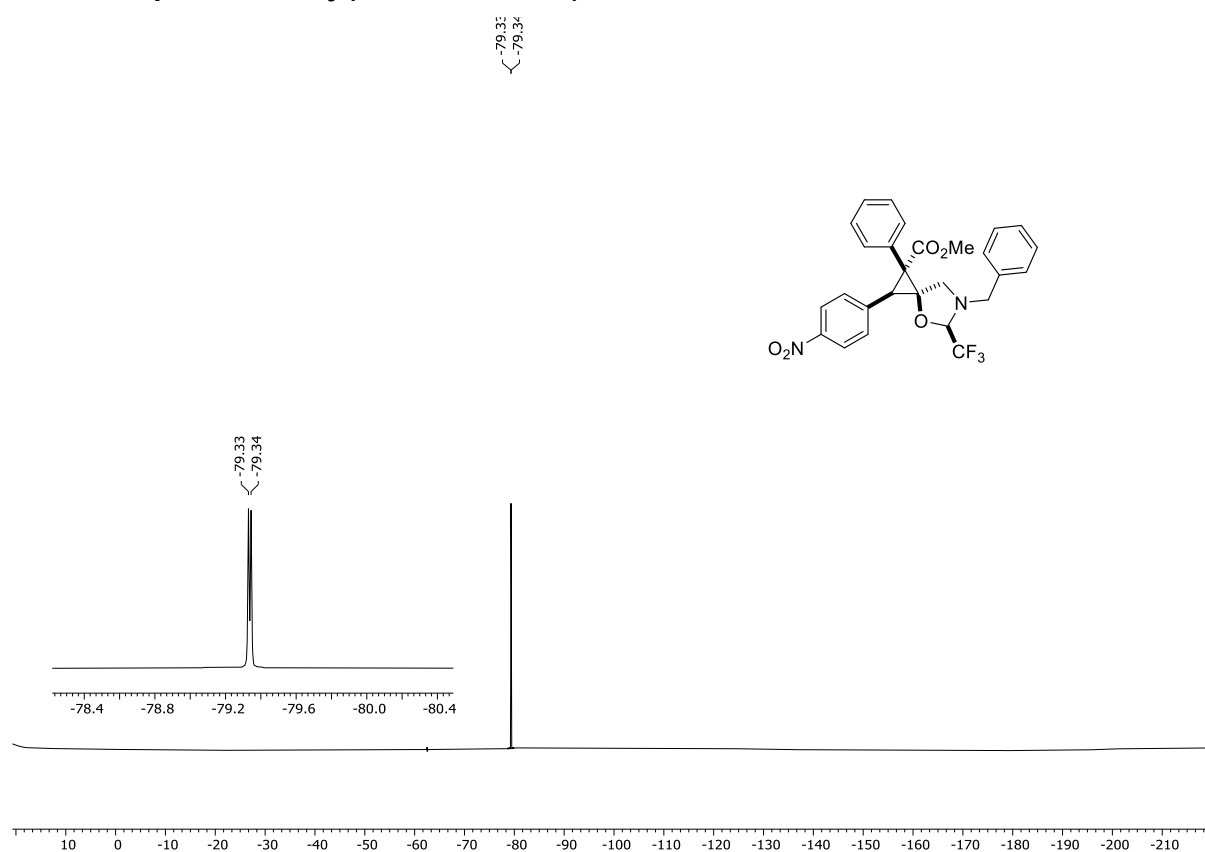

# <sup>1</sup>H NMR Spectrum of 6k (400 MHz, CDCl<sub>3</sub>)

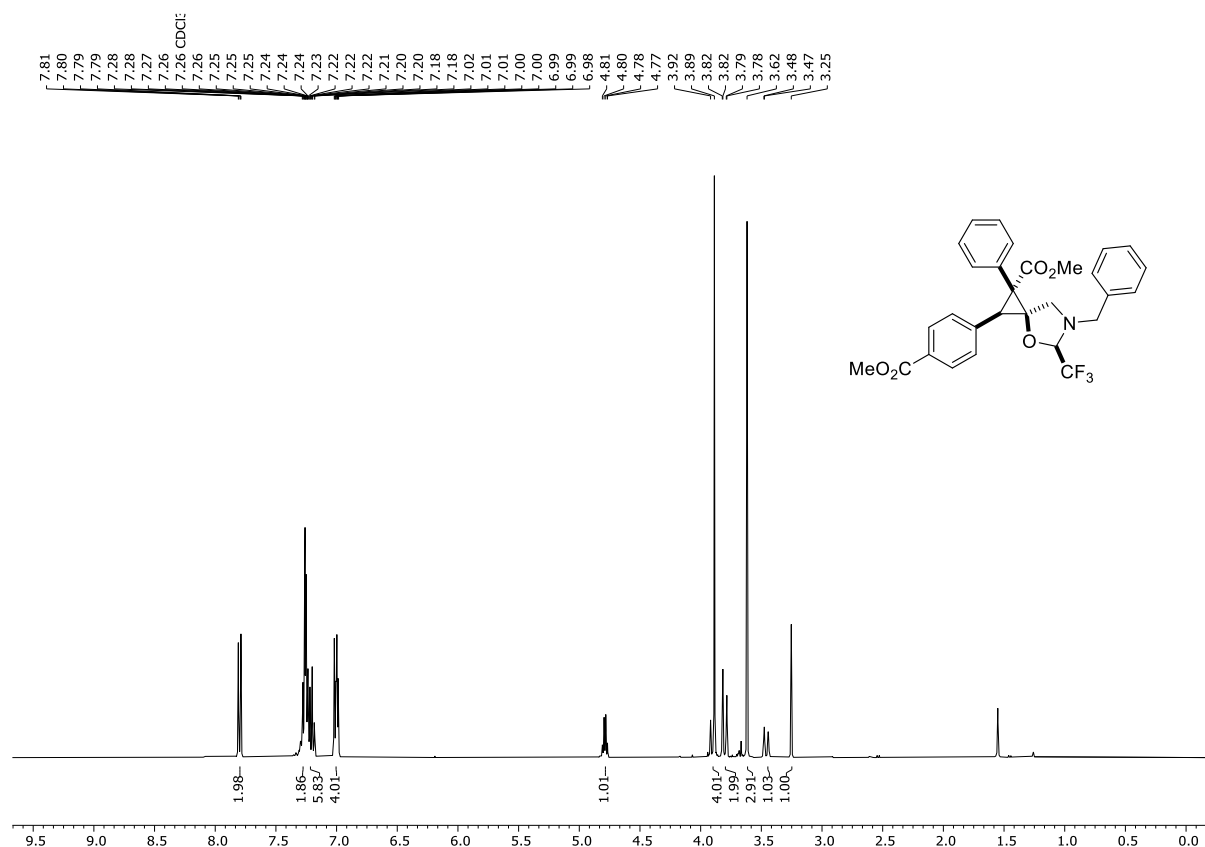

# <sup>13</sup>C NMR Spectrum of 6k (101 MHz, CDCl<sub>3</sub>)

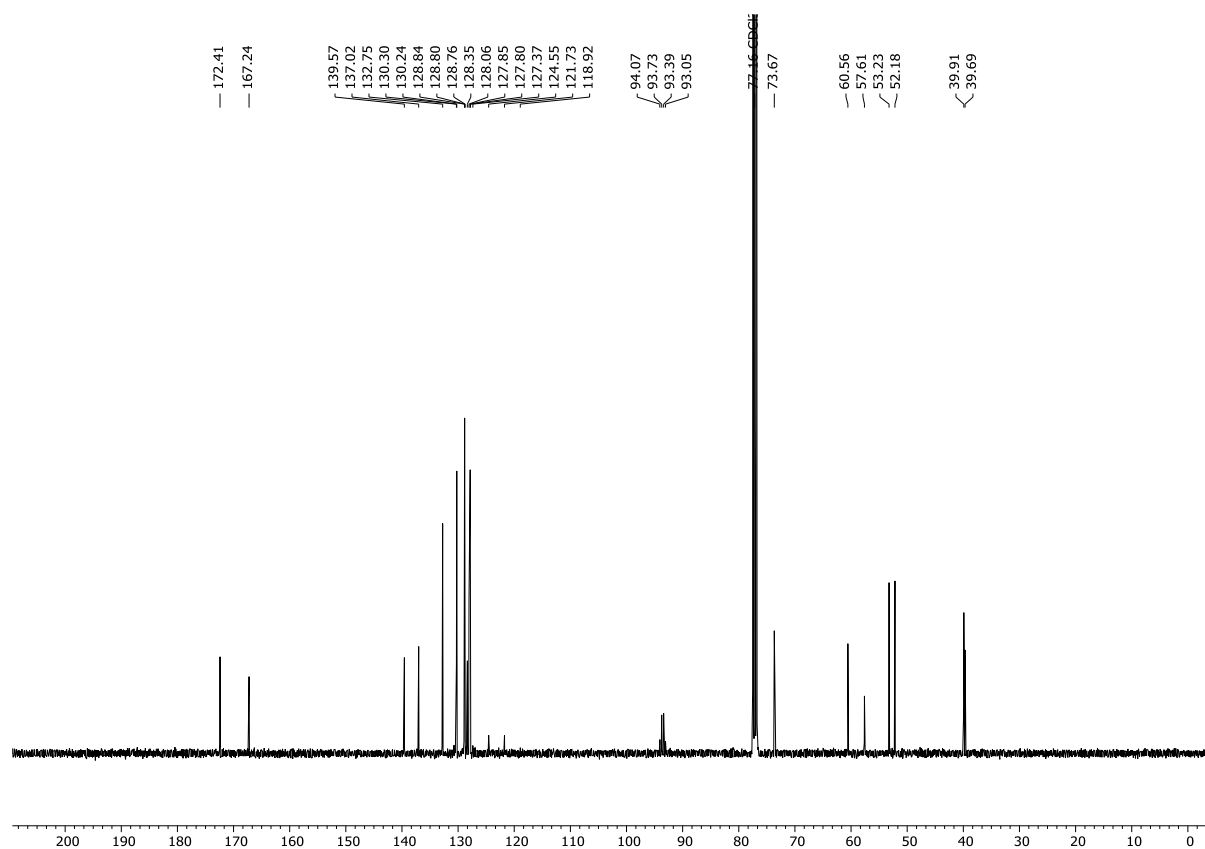

**$^{19}\text{F}$  NMR Spectrum of 6k (376 MHz,  $\text{CDCl}_3$ )**

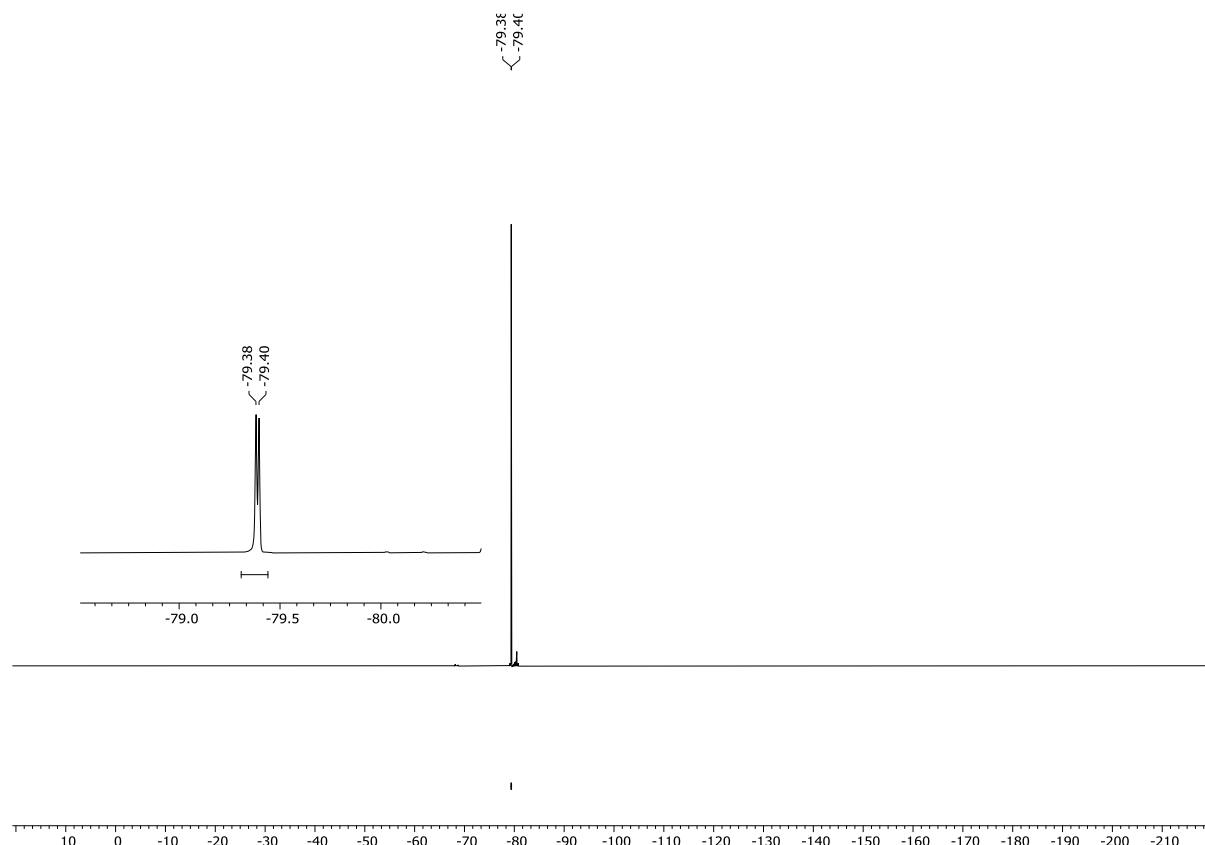

**$^1\text{H}$  NMR Spectrum of 492 6l (400 MHz,  $\text{CDCl}_3$ )**

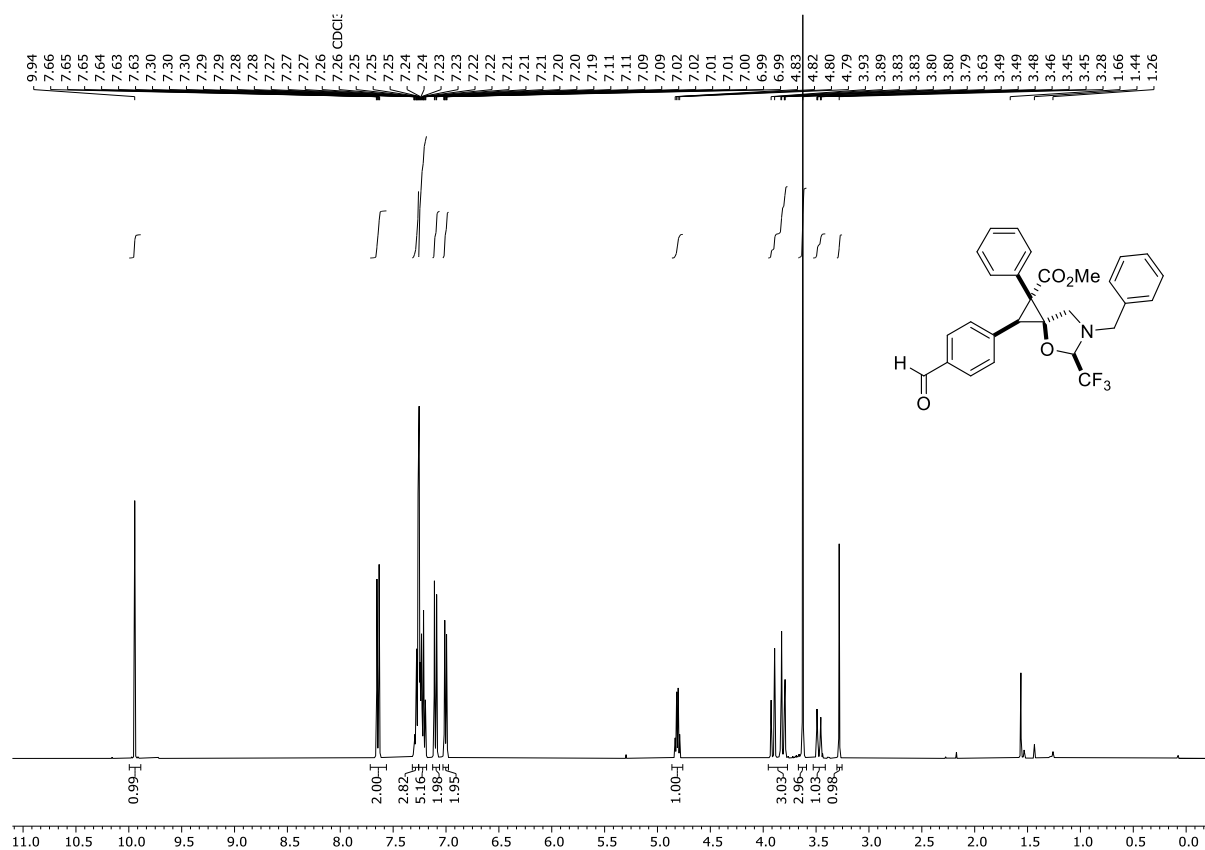



**$^{13}\text{C}$  NMR Spectrum of 6I (101 MHz,  $\text{CDCl}_3$ )**

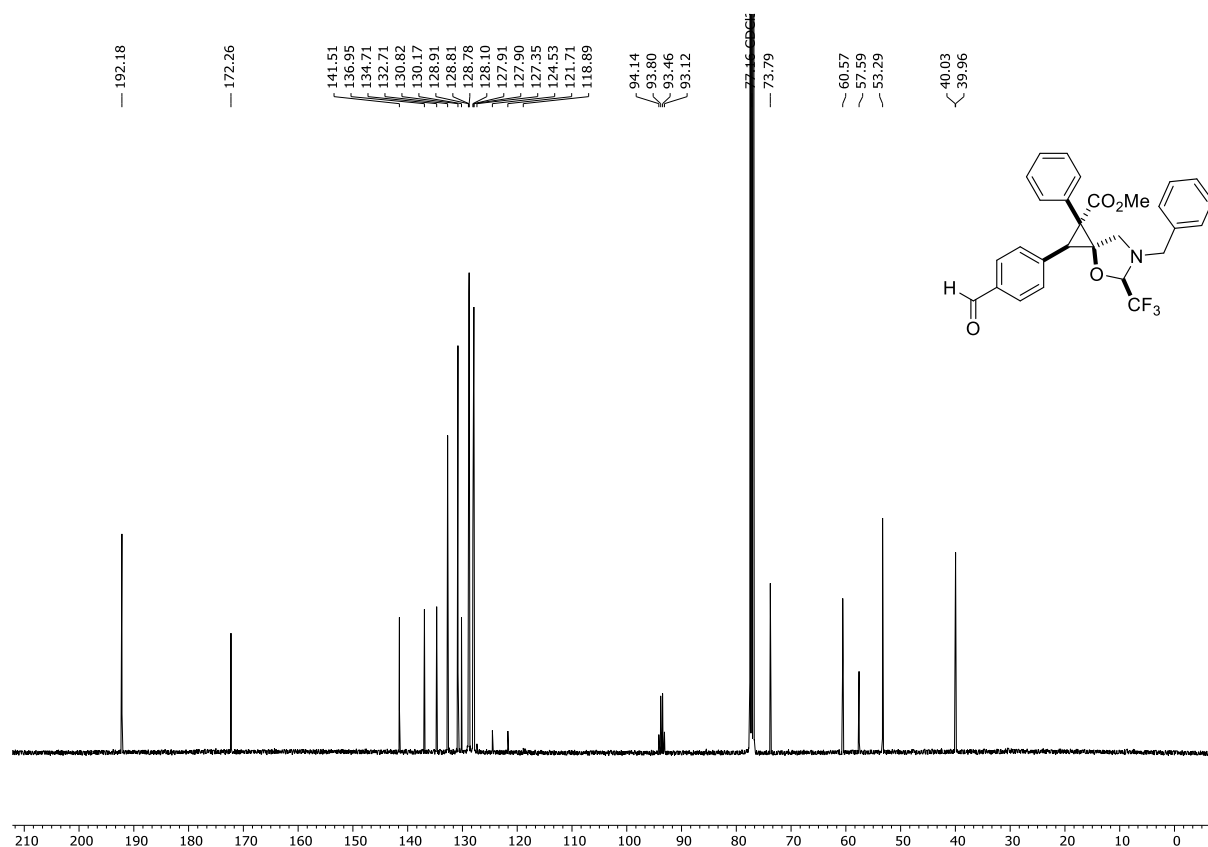

**$^{19}\text{F}$  NMR Spectrum of 6I (376 MHz,  $\text{CDCl}_3$ )**

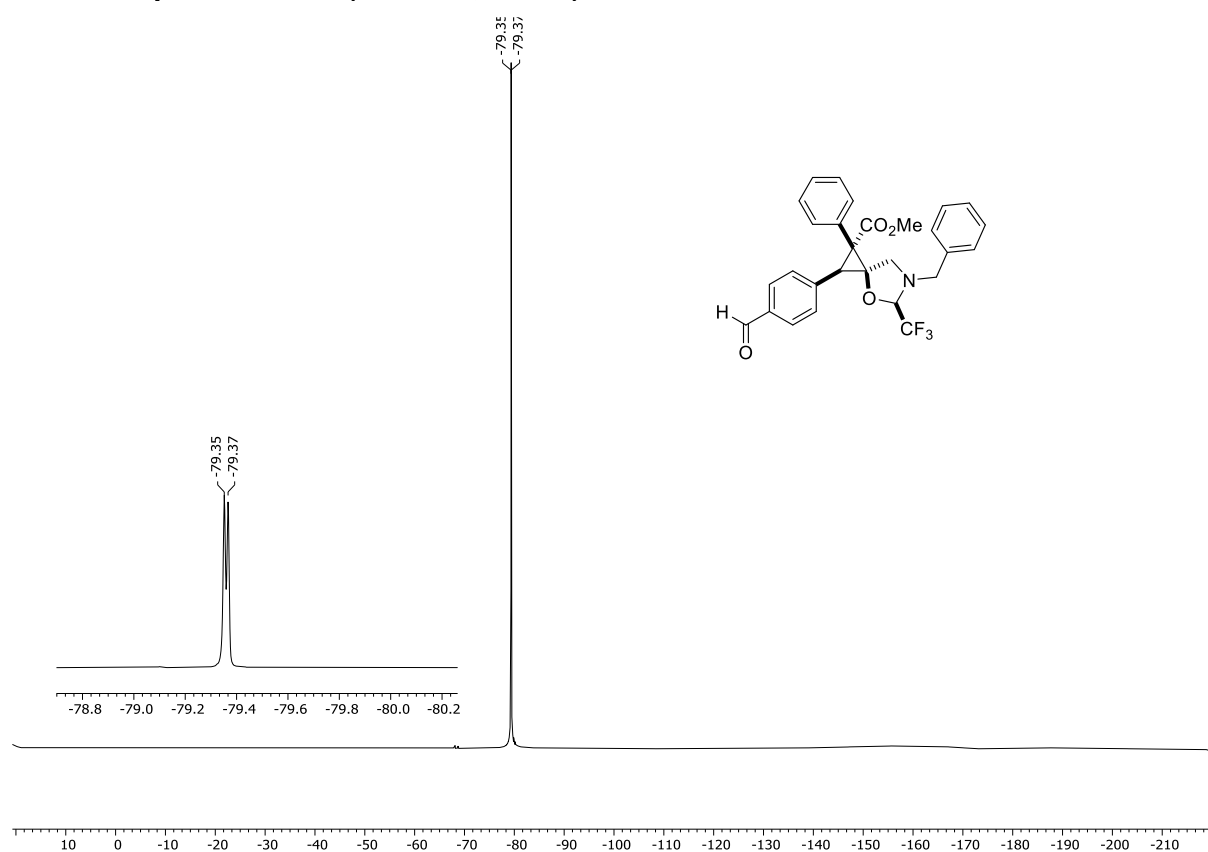

**<sup>1</sup>H NMR Spectrum of 6m (400 MHz, CDCl<sub>3</sub>)**

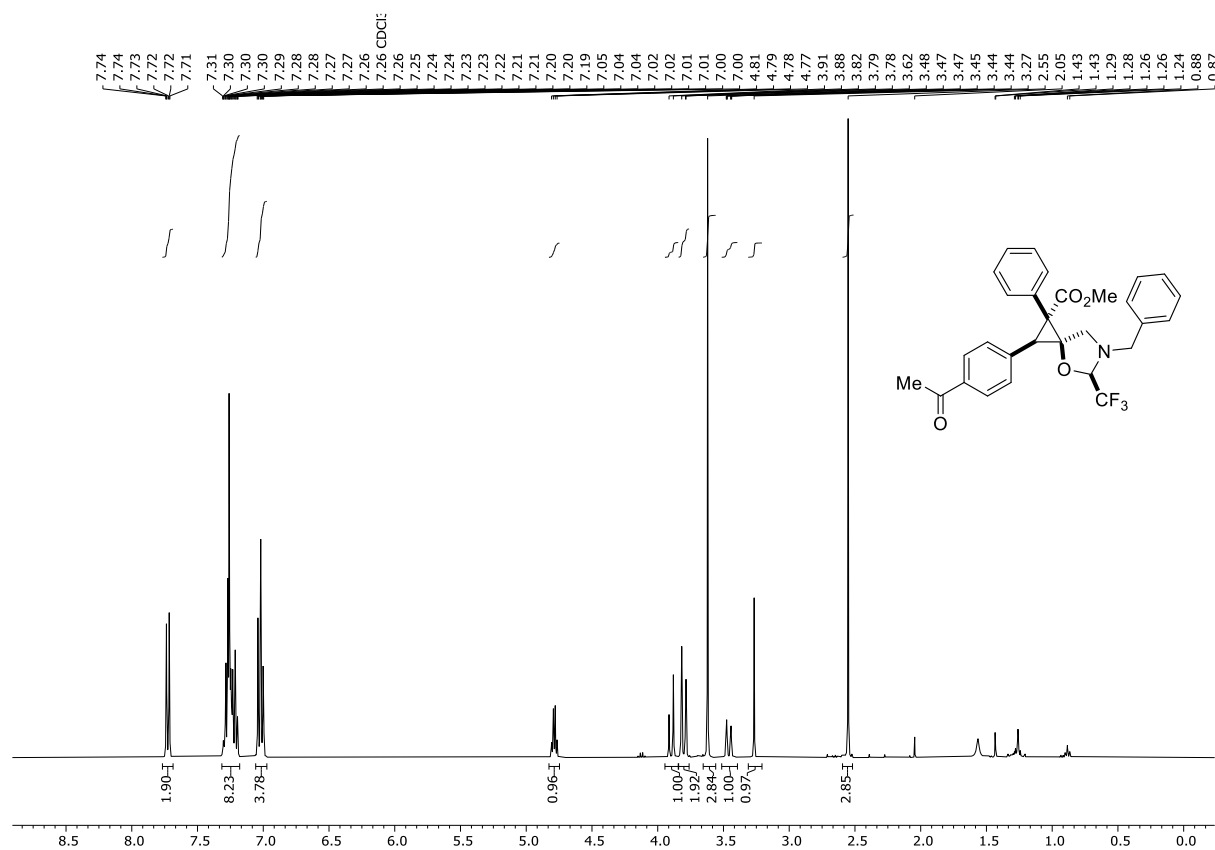

**<sup>13</sup>C NMR Spectrum of 6m (101 MHz, CDCl<sub>3</sub>)**

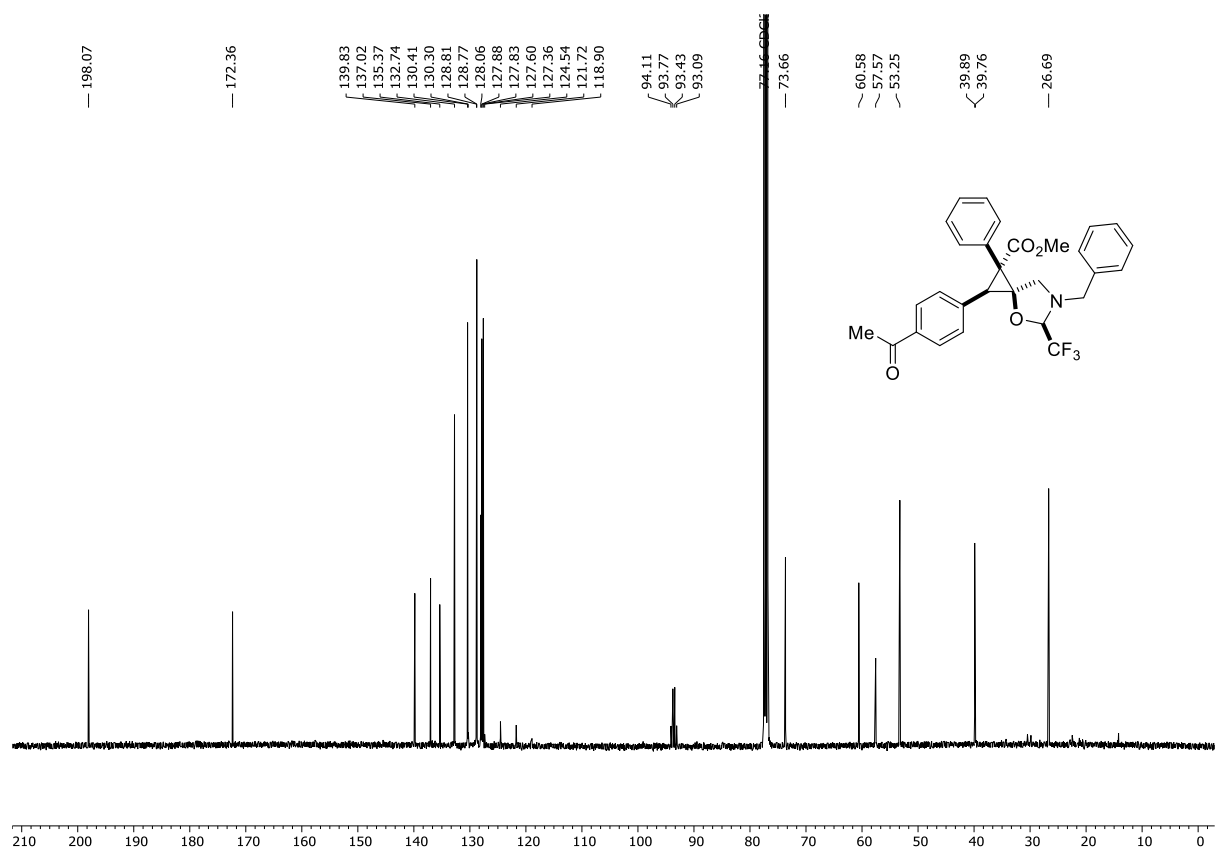

**<sup>19</sup>F NMR Spectrum of 6m (376 MHz, CDCl<sub>3</sub>)**

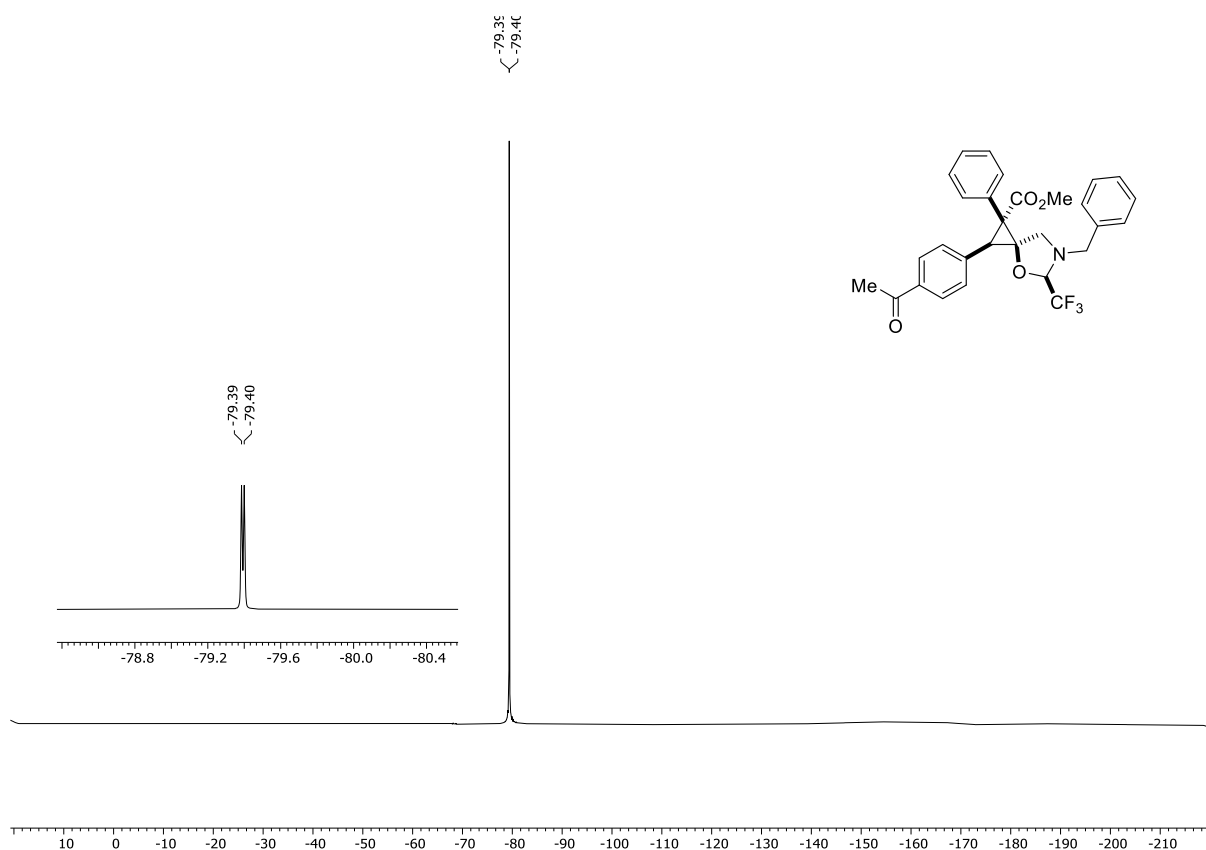

# <sup>1</sup>H NMR Spectrum of 6n (400 MHz, CDCl<sub>3</sub>)

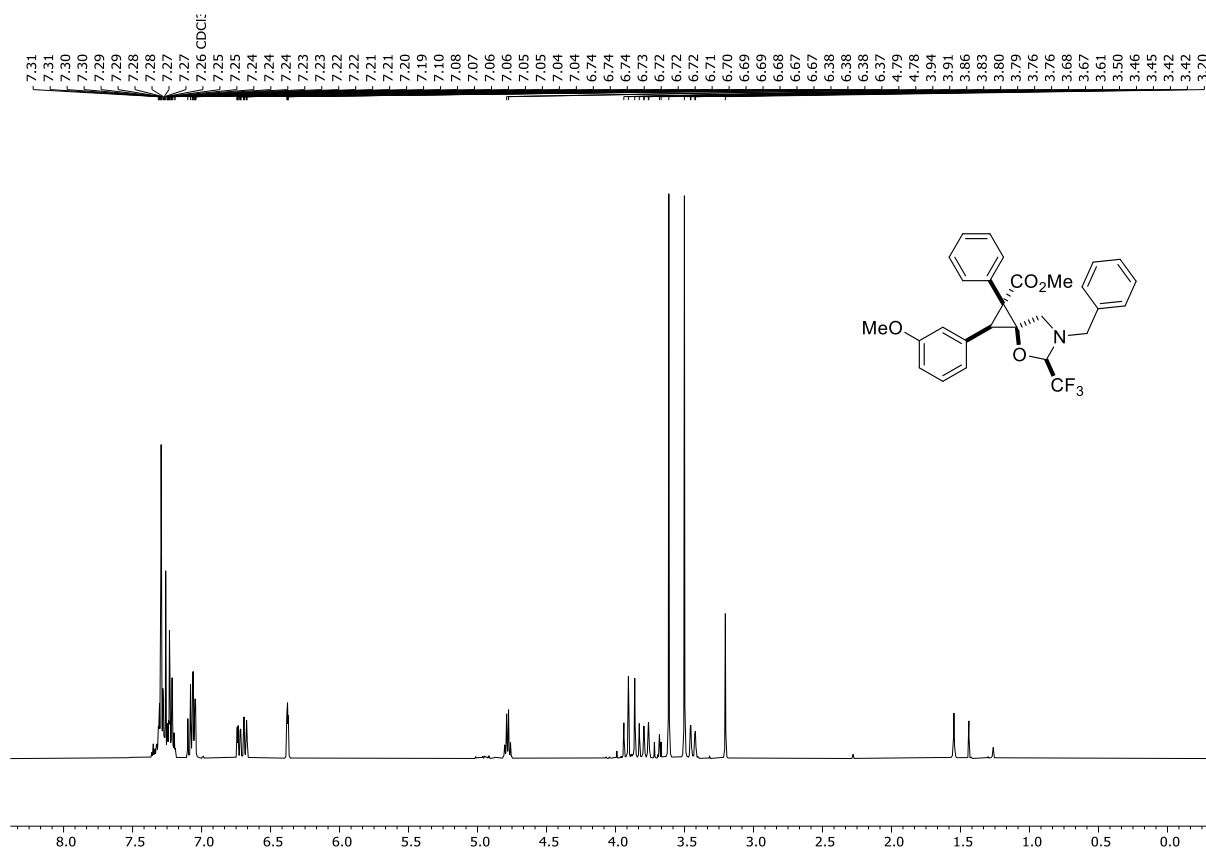

**$^{13}\text{C}$  NMR Spectrum of 6n (101 MHz,  $\text{CDCl}_3$ )**

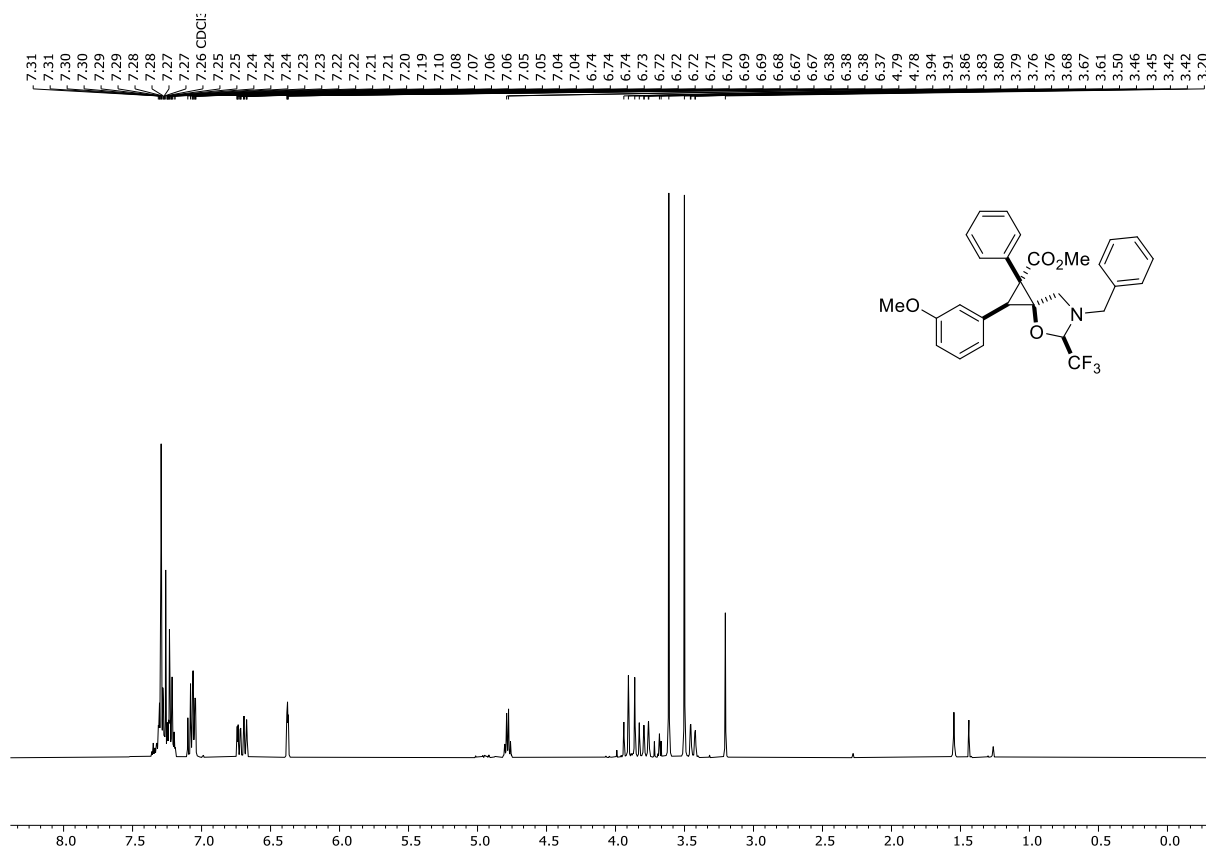

**$^{19}\text{F}$  NMR Spectrum of 6n (376 MHz,  $\text{CDCl}_3$ )**

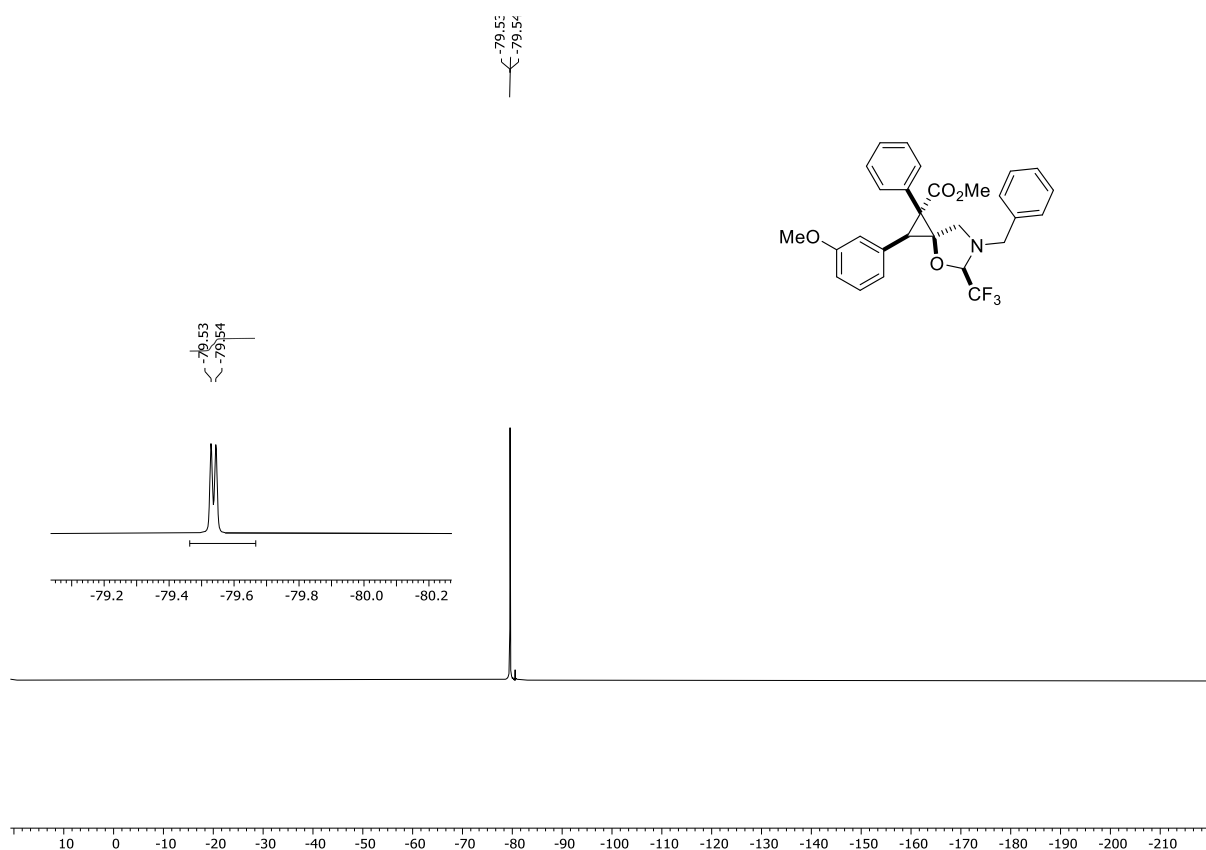

**$^1\text{H}$  NMR Spectrum of 6o (400 MHz,  $\text{CDCl}_3$ )**

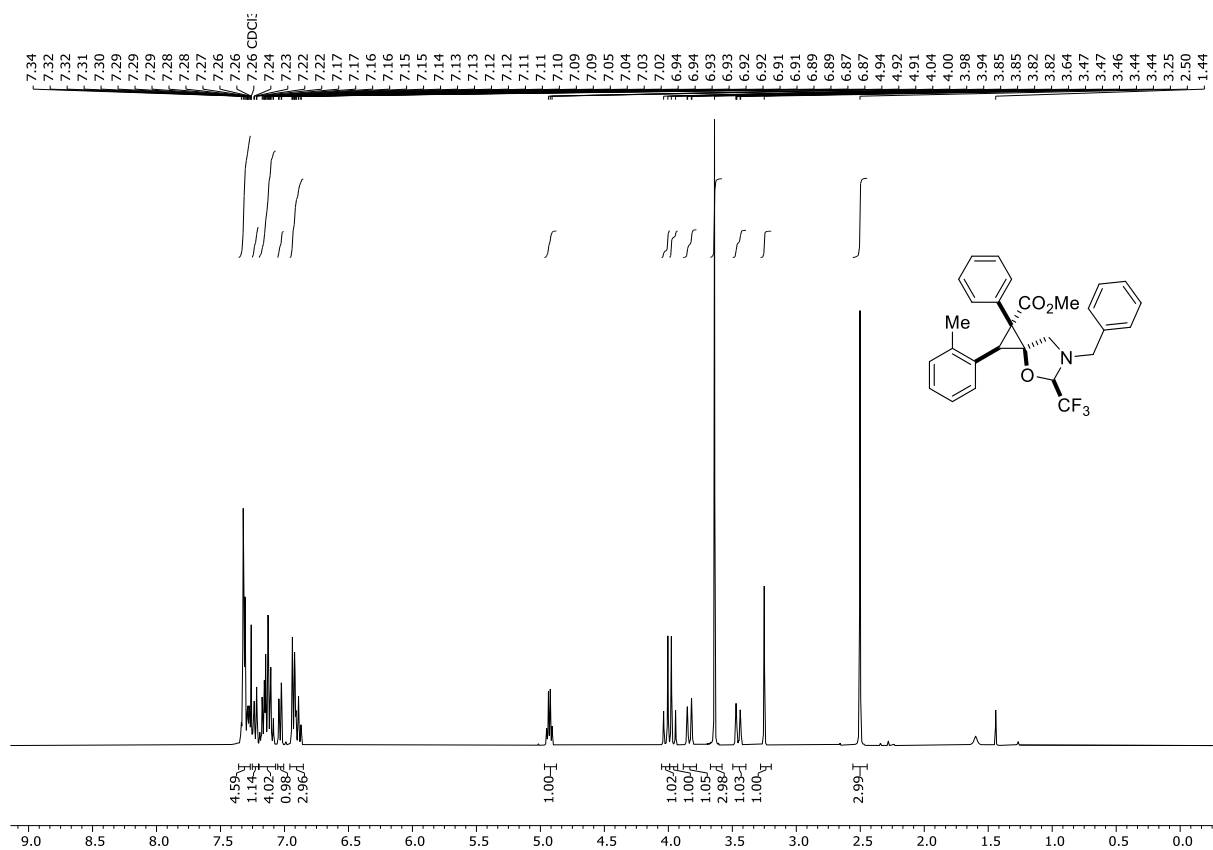

**<sup>13</sup>C NMR Spectrum of 6o (101 MHz, CDCl<sub>3</sub>)**

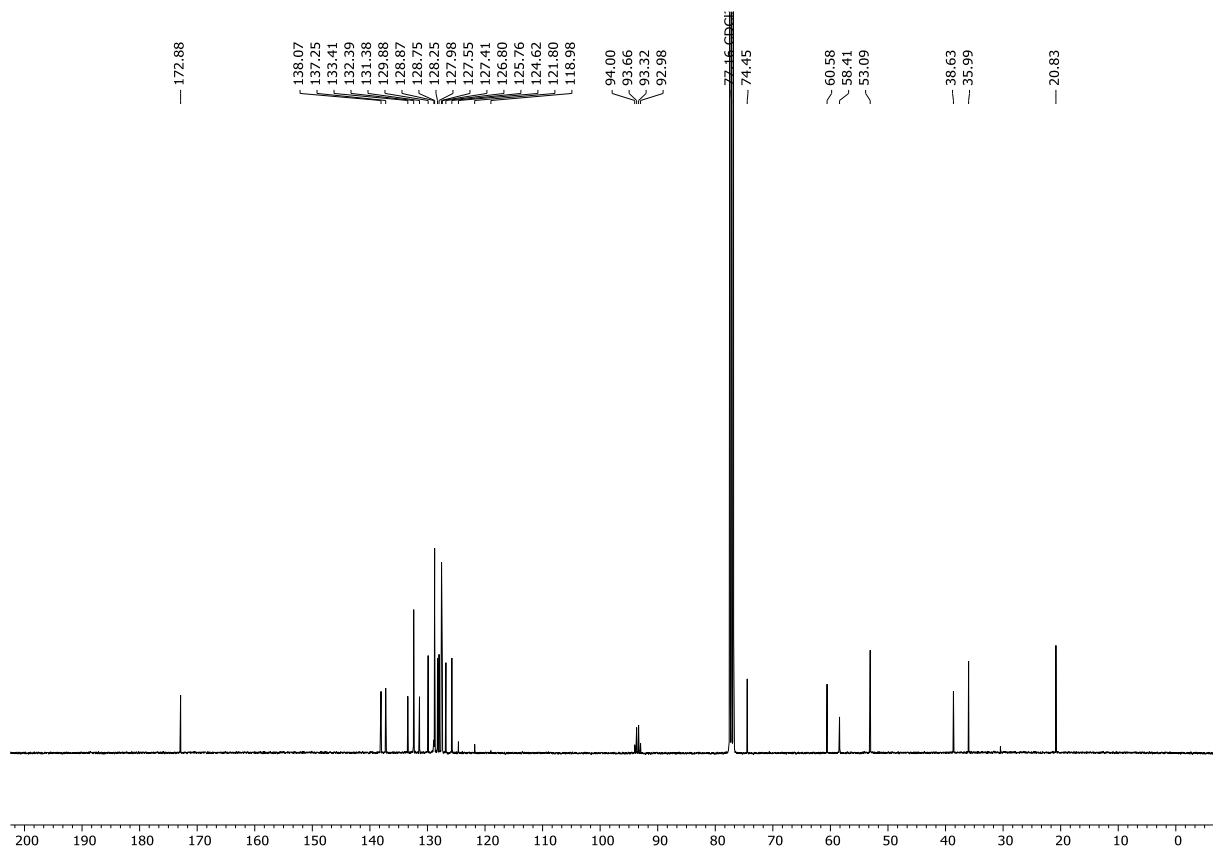

**<sup>19</sup>F NMR Spectrum of 6o (376 MHz, CDCl<sub>3</sub>)**

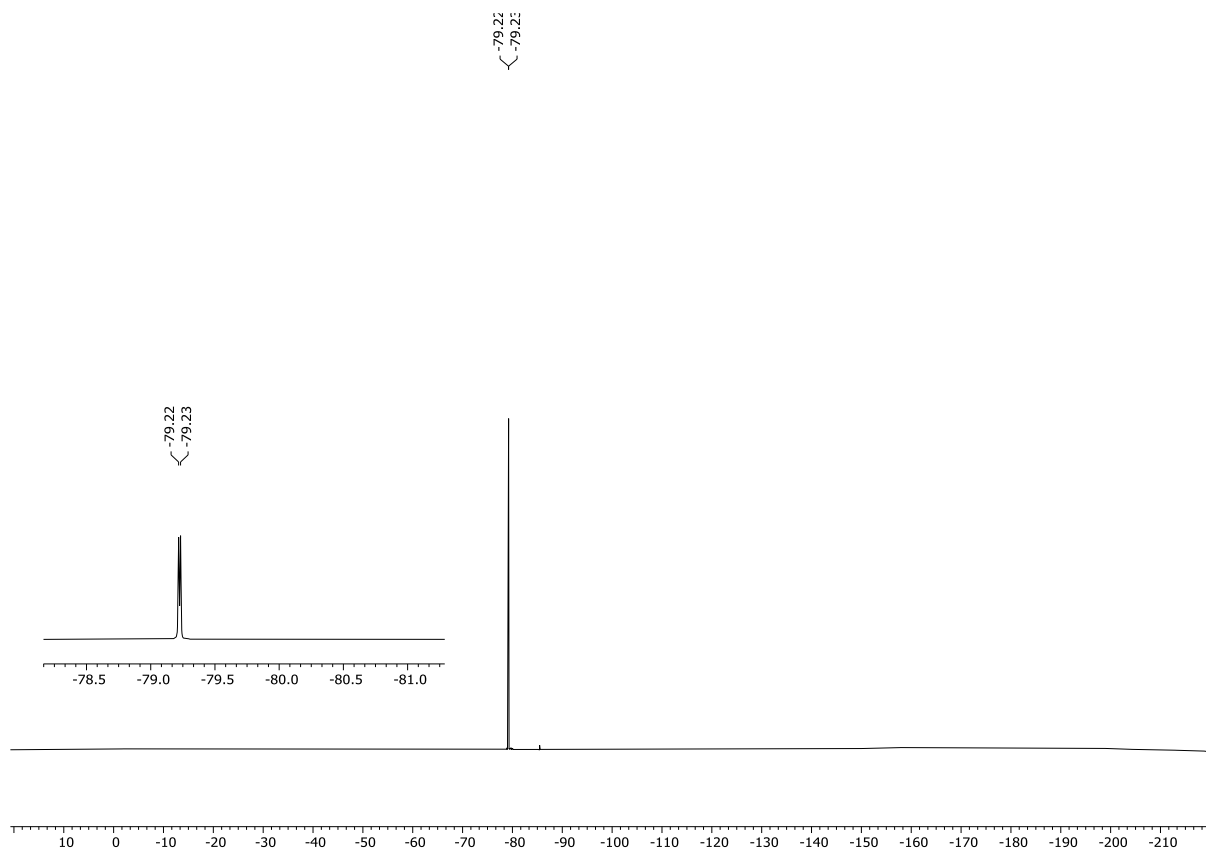

<sup>1</sup>H NMR Spectrum of 6p (400 MHz, CDCl<sub>3</sub>)

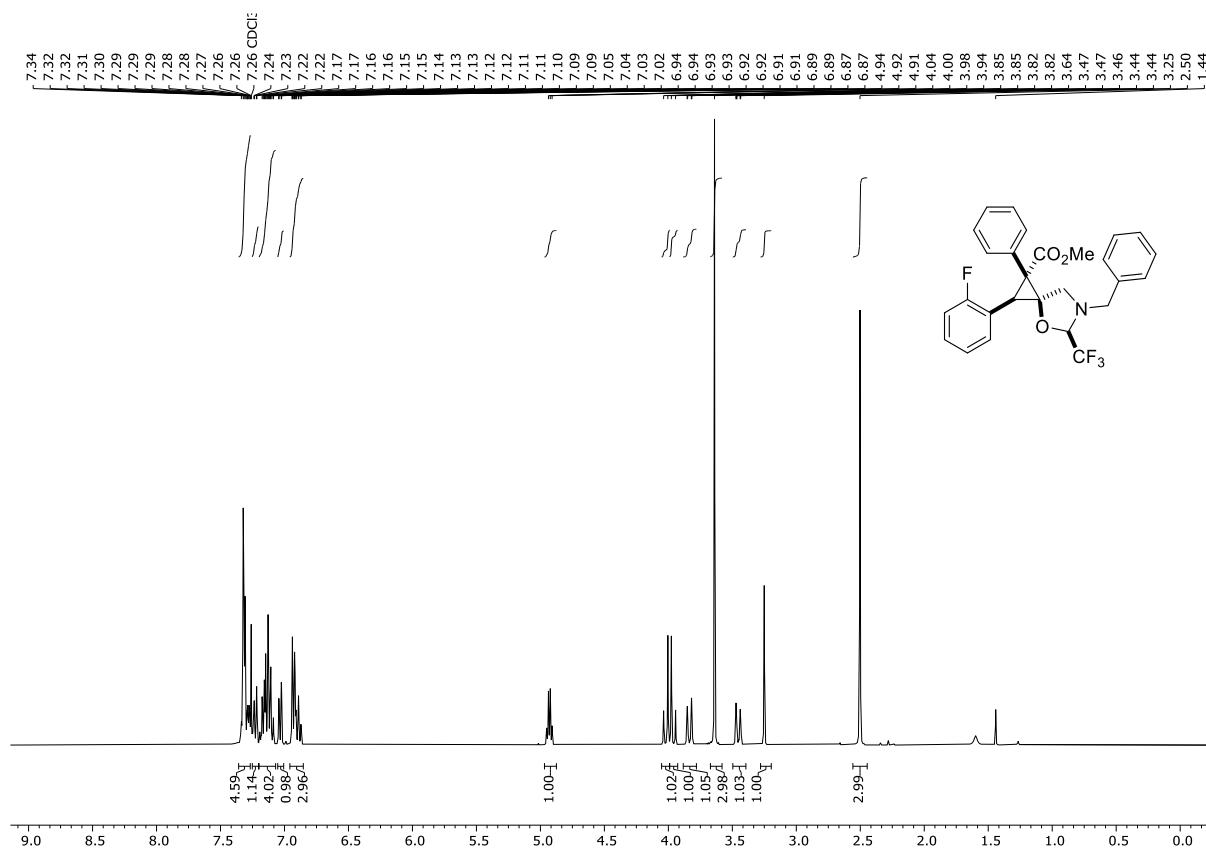

<sup>13</sup>C NMR Spectrum of 6p (101 MHz, CDCl<sub>3</sub>)

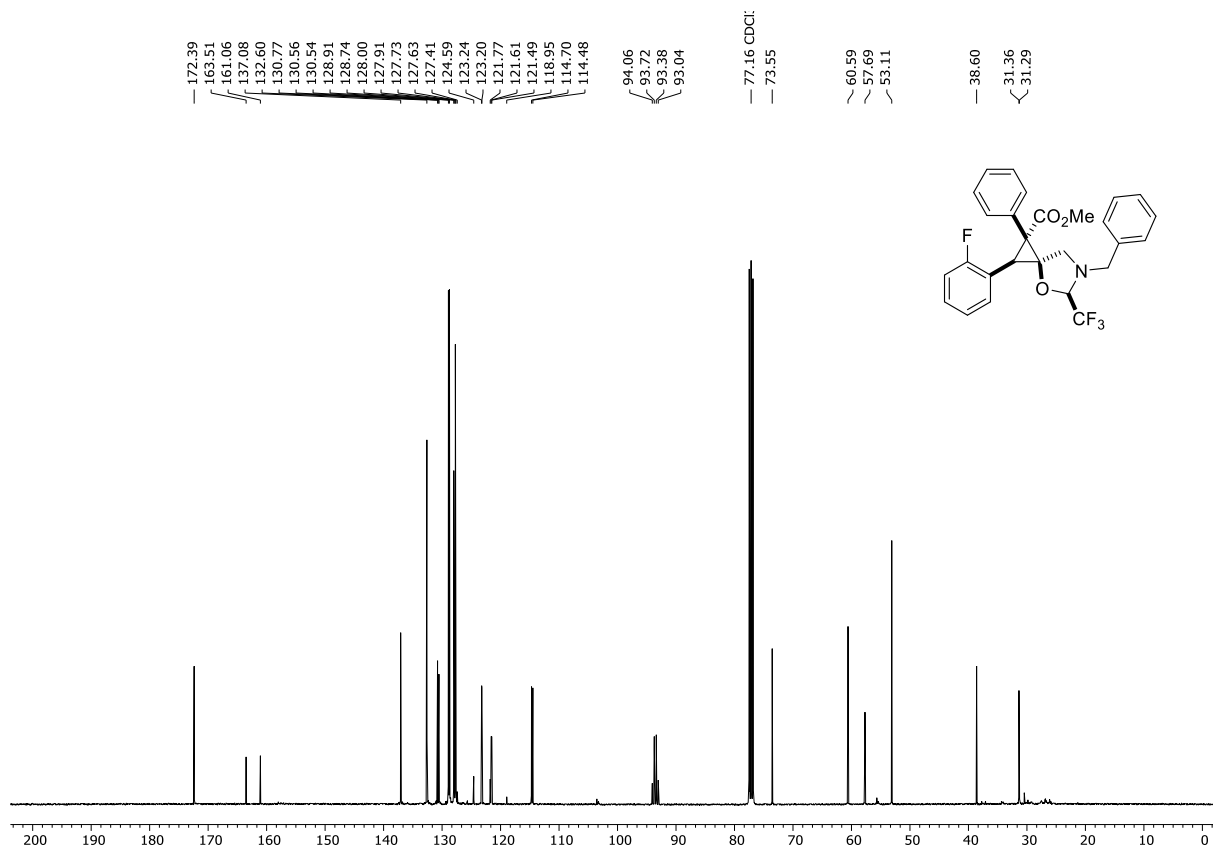

### <sup>19</sup>F NMR Spectrum of 6p (376 MHz, CDCl<sub>3</sub>)

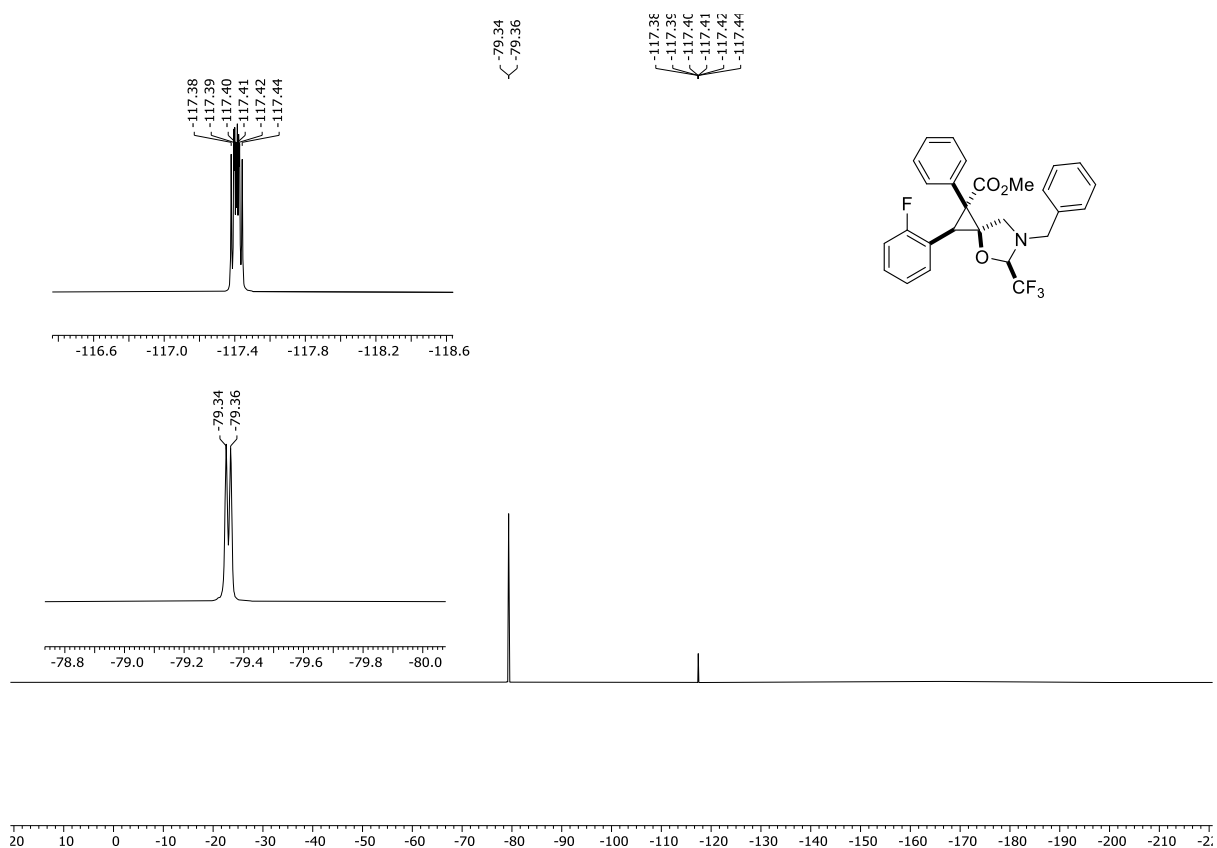

**<sup>1</sup>H NMR Spectrum of 6q (400 MHz, CDCl<sub>3</sub>)**

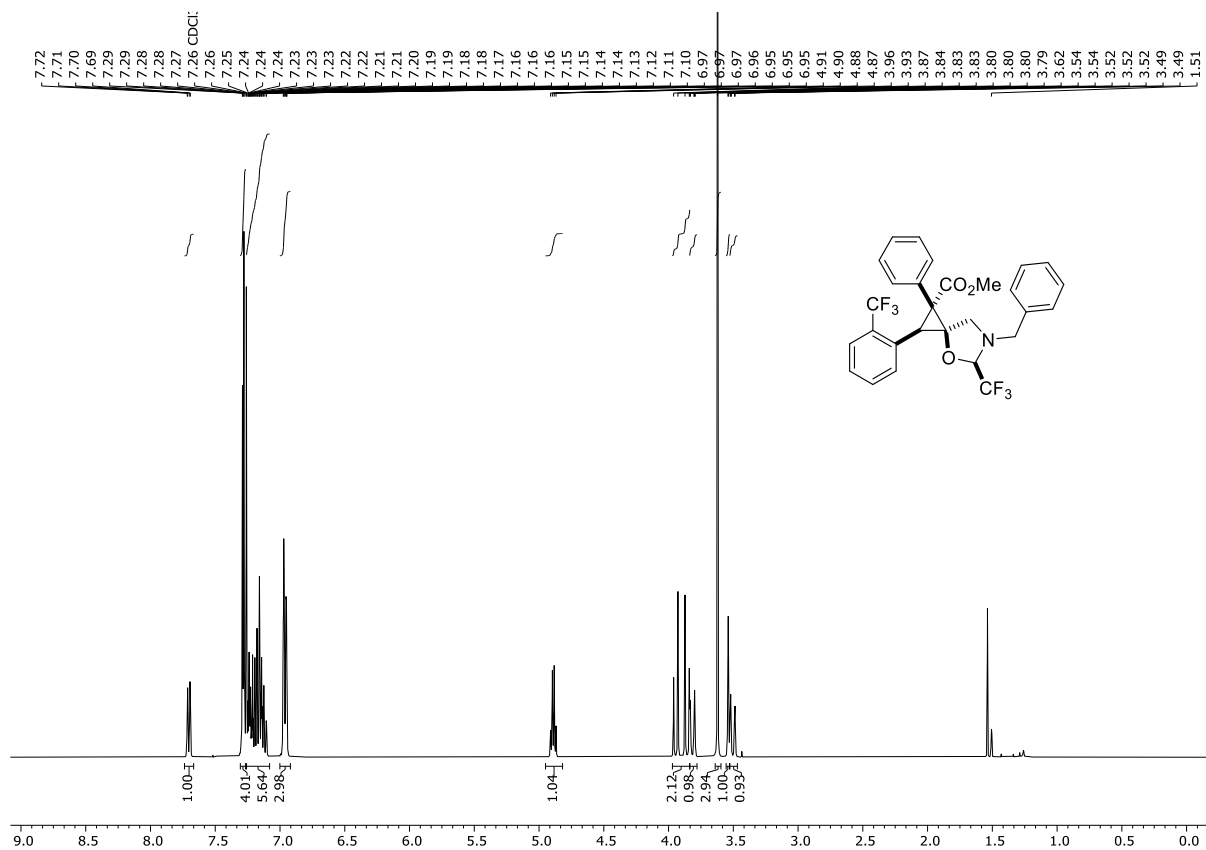

**<sup>13</sup>C NMR Spectrum of 6q (101 MHz, CDCl<sub>3</sub>)**

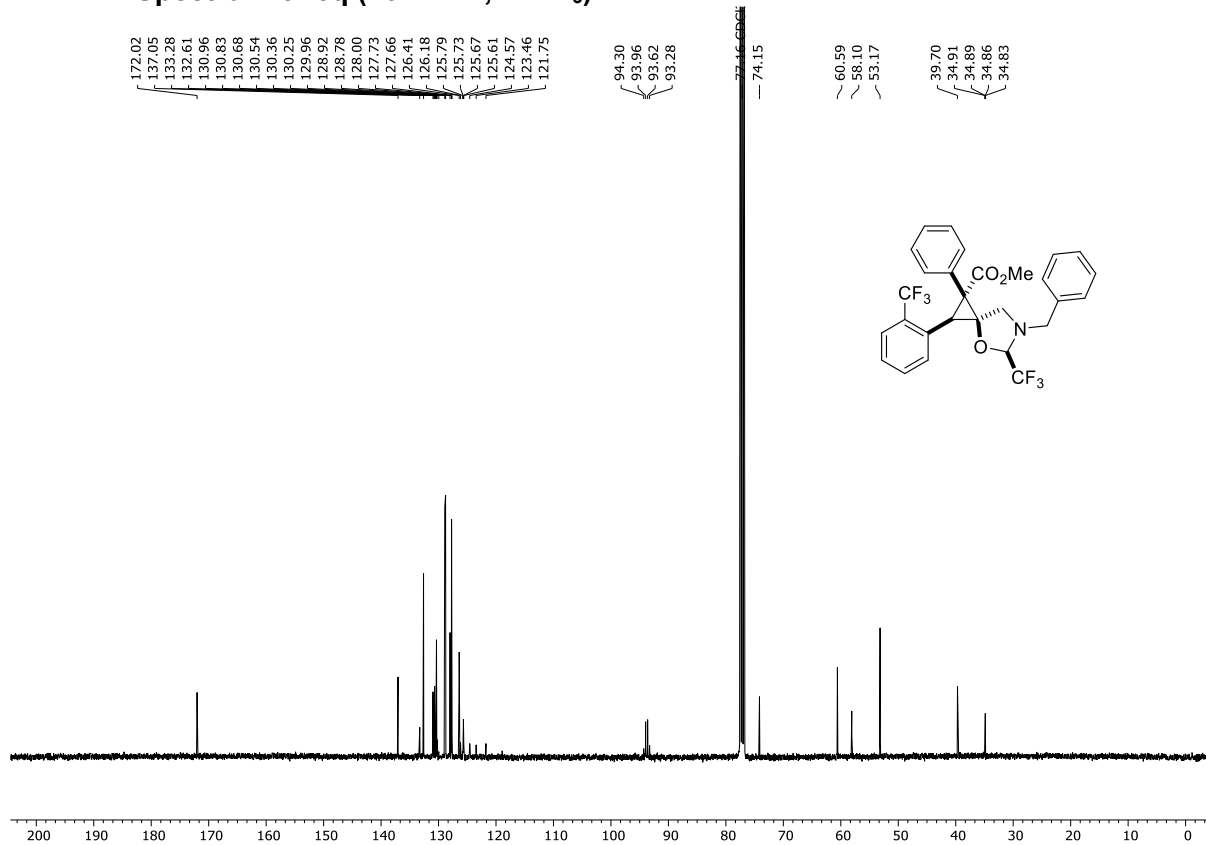



**$^{19}\text{F}$  NMR Spectrum of 6q (376 MHz,  $\text{CDCl}_3$ )**

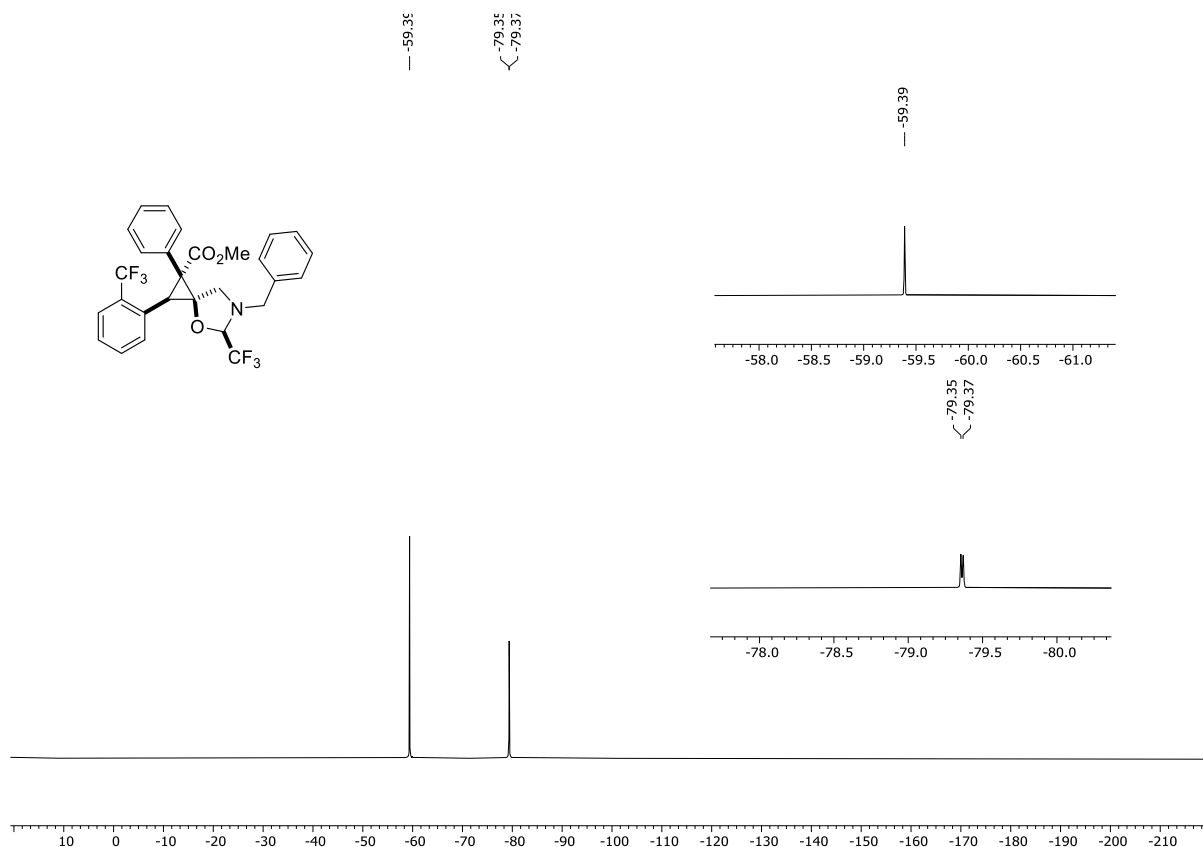

**$^1\text{H}$  NMR Spectrum of 6r (400 MHz,  $\text{CDCl}_3$ )**

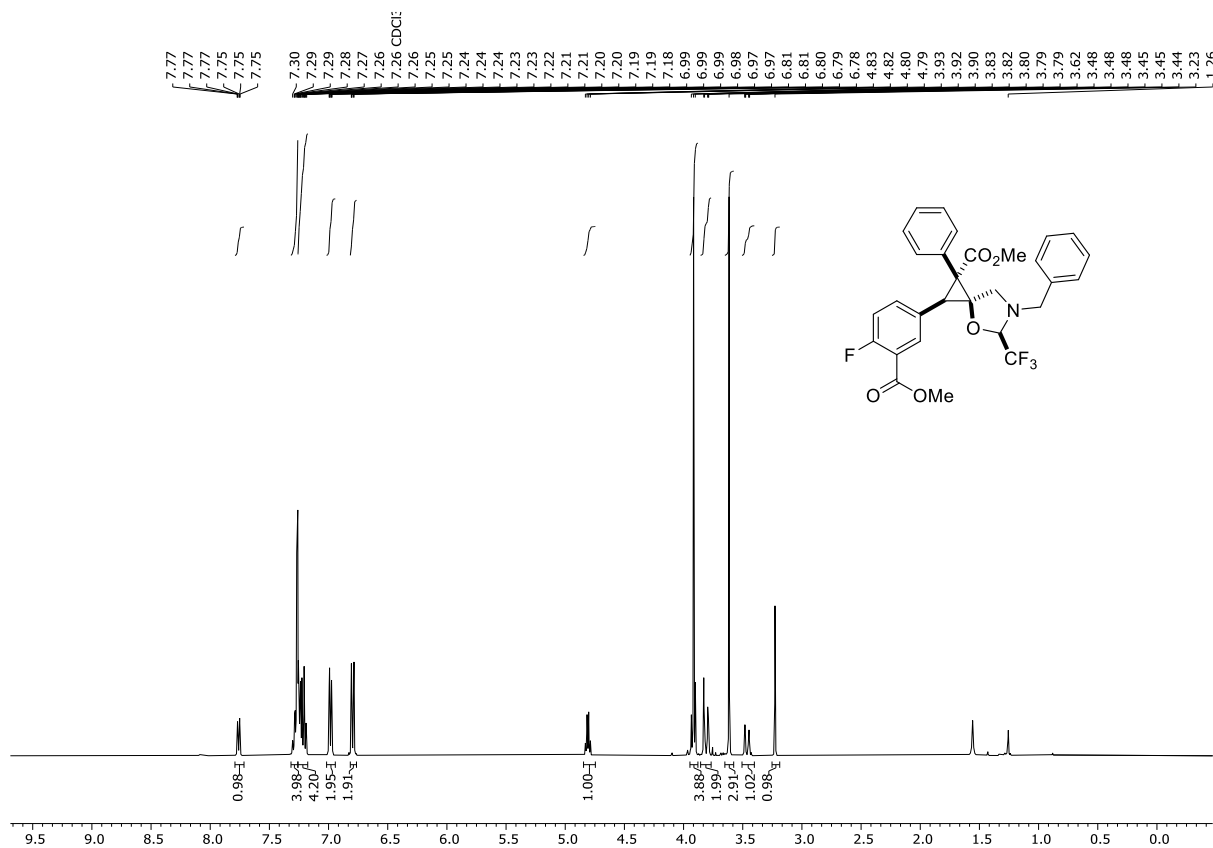

**$^{13}\text{C}$  NMR Spectrum of 6r (101 MHz,  $\text{CDCl}_3$ )**

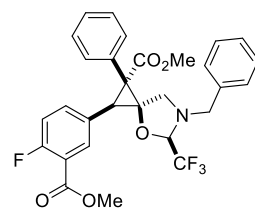

Chemical structure of compound 10 is shown on the right. The structure is a complex molecule featuring a central carbon atom bonded to a phenyl group, a methoxycarbonyl group (CO<sub>2</sub>Me), a trifluoromethyl group (CF<sub>3</sub>), and a nitrogen atom. The nitrogen atom is part of a 1,3-dioxolane ring system, which is also substituted with a phenyl group and a trifluoromethyl group (CF<sub>3</sub>). The molecule is labeled with a '10' in a circle.

**<sup>1</sup>H NMR Spectrum of 6s (400 MHz, CDCl<sub>3</sub>)**

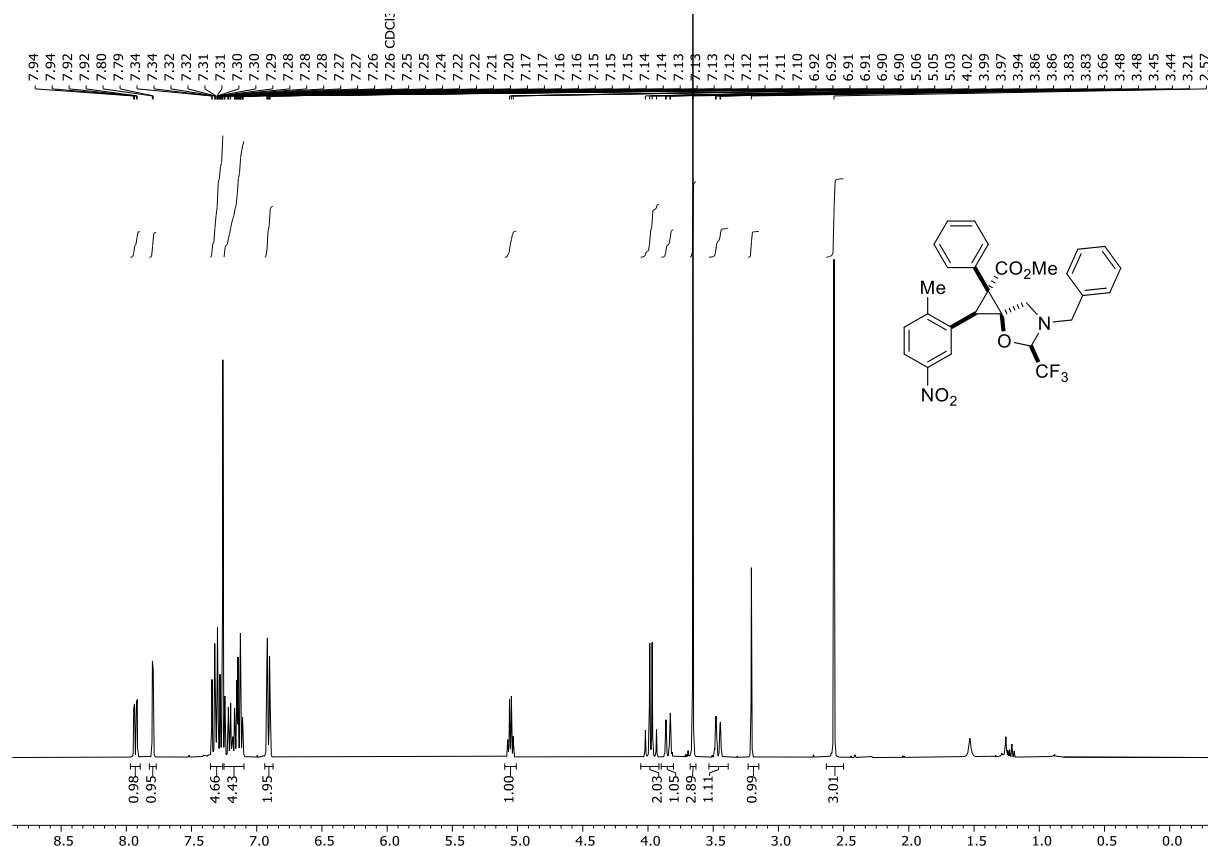

**<sup>13</sup>C NMR Spectrum of 6s (101 MHz, CDCl<sub>3</sub>)**

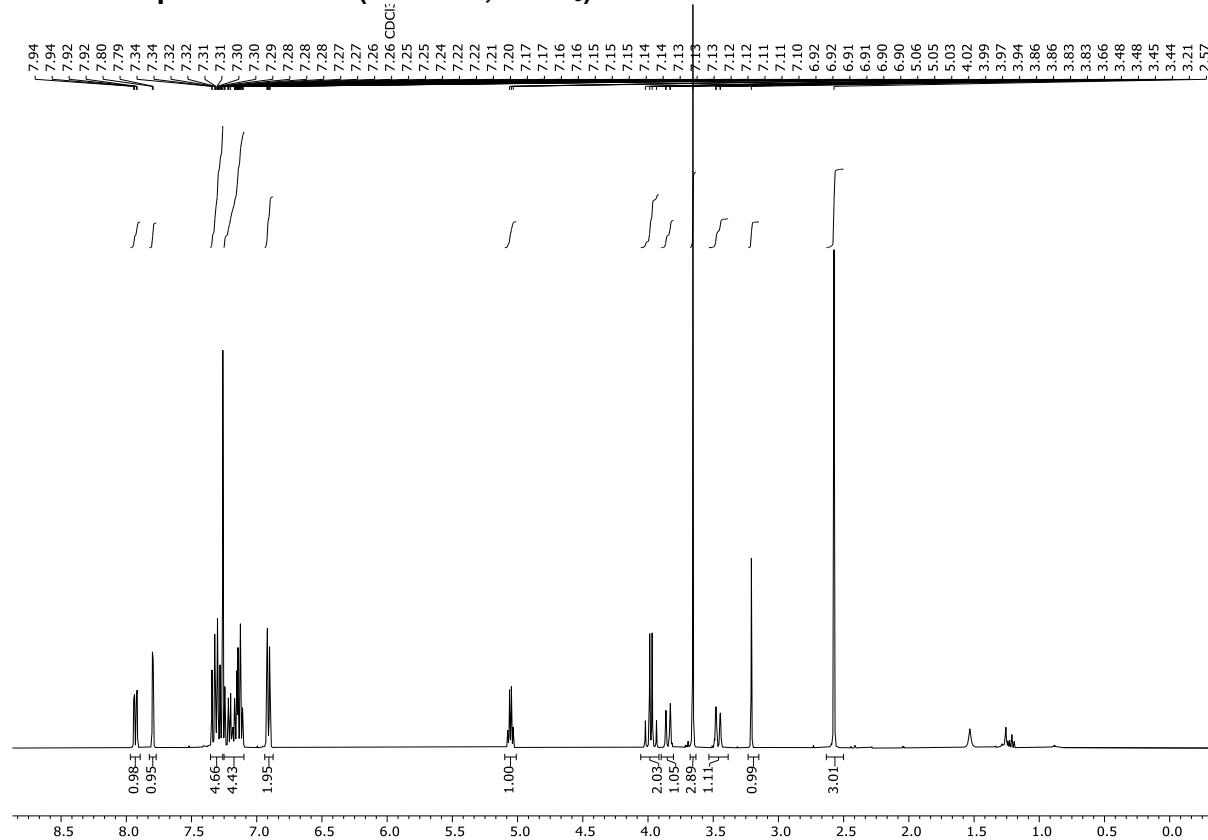

**$^{19}\text{F}$  NMR Spectrum of 6s (376 MHz,  $\text{CDCl}_3$ )**

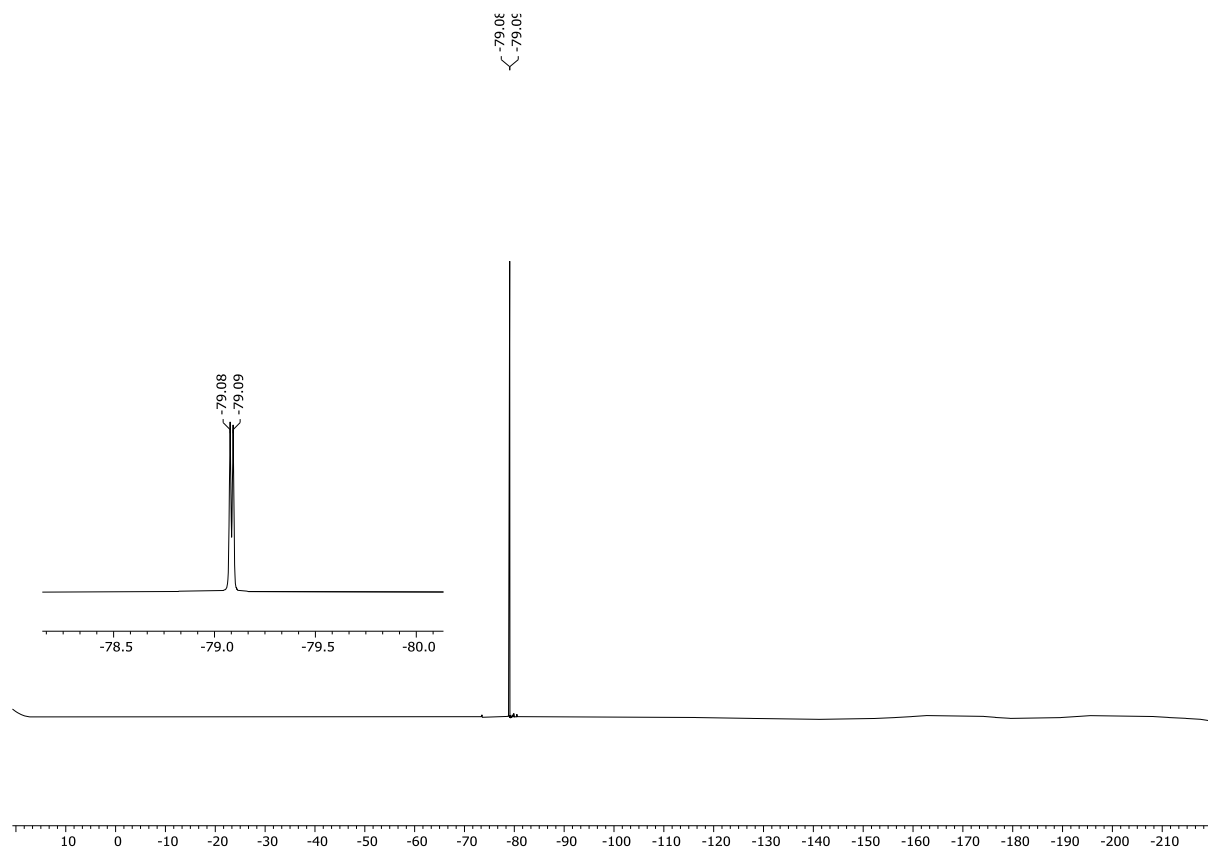

**$^1\text{H}$  NMR Spectrum of 500 6t (400 MHz,  $\text{CDCl}_3$ )**

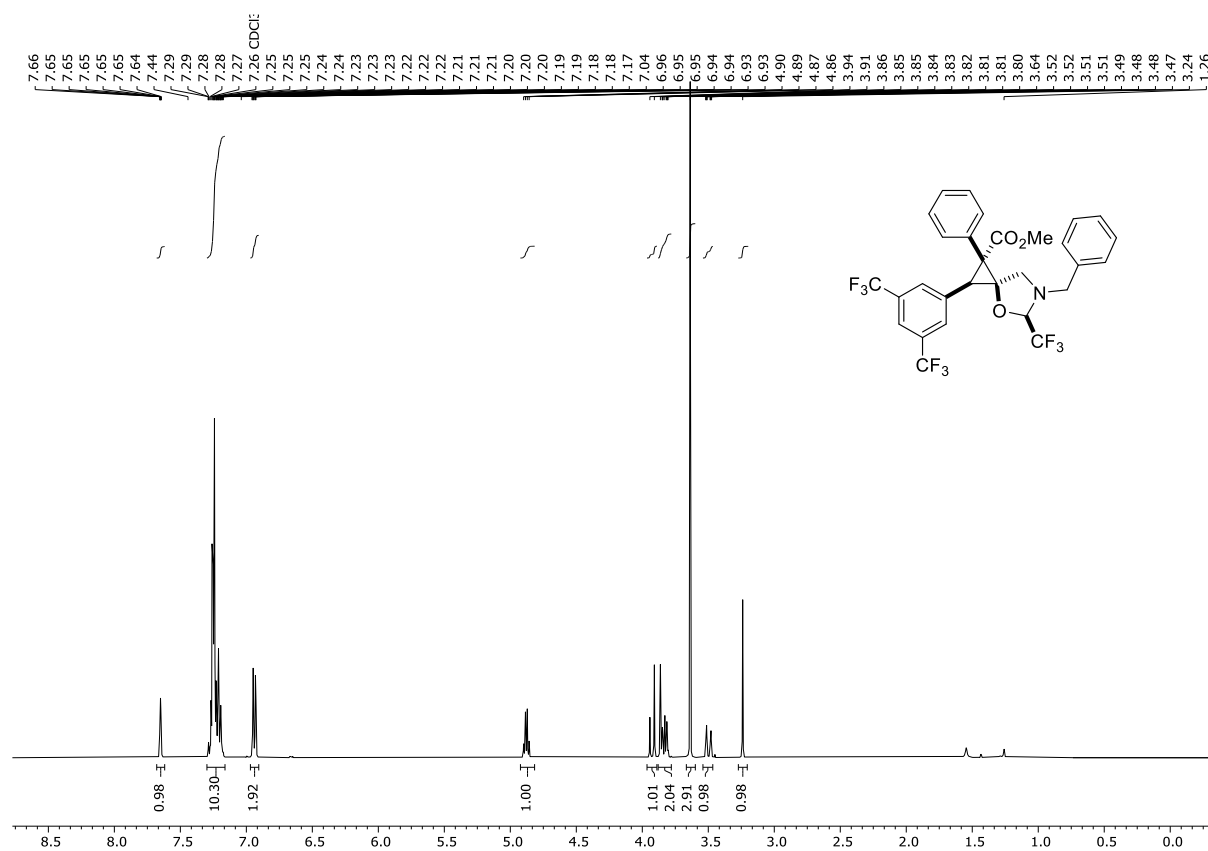

**$^{13}\text{C}$  NMR Spectrum of 6t (101 MHz,  $\text{CDCl}_3$ )**

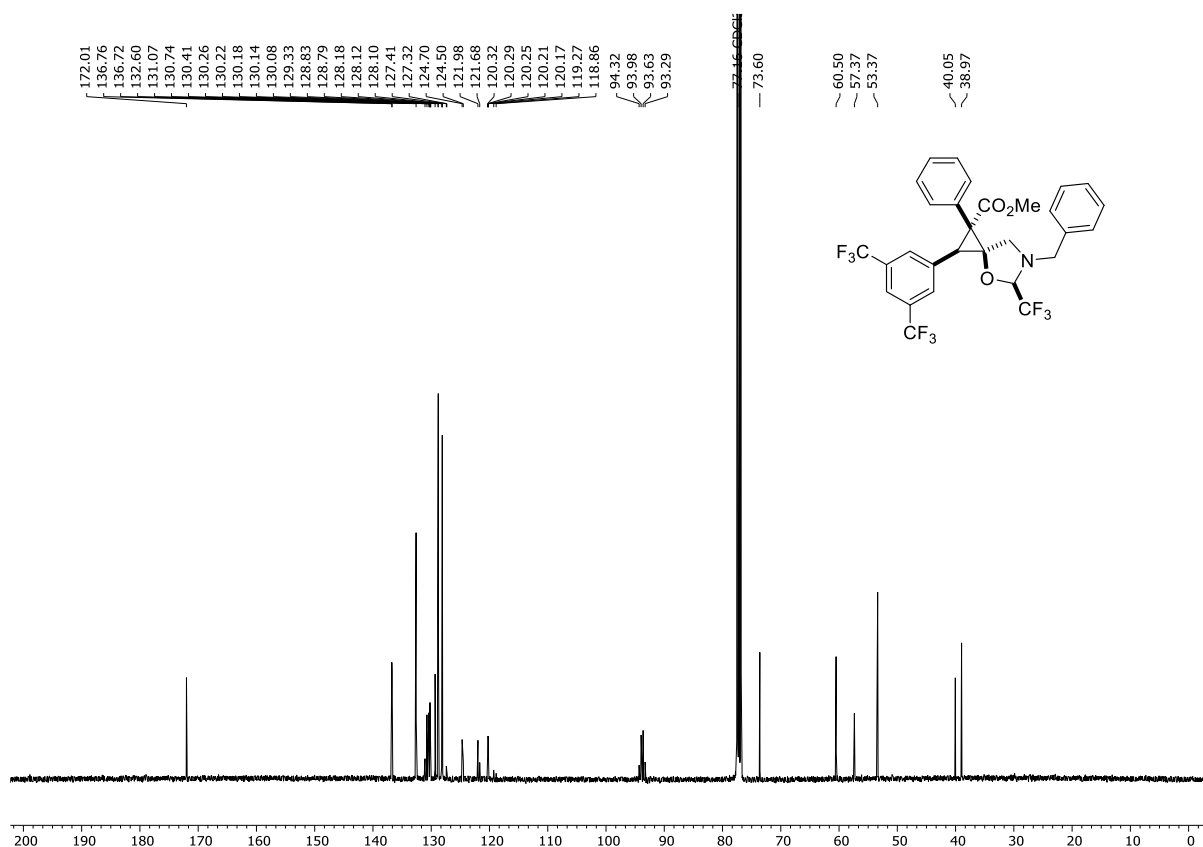

**$^{19}\text{F}$  NMR Spectrum of 6t (376 MHz,  $\text{CDCl}_3$ )**

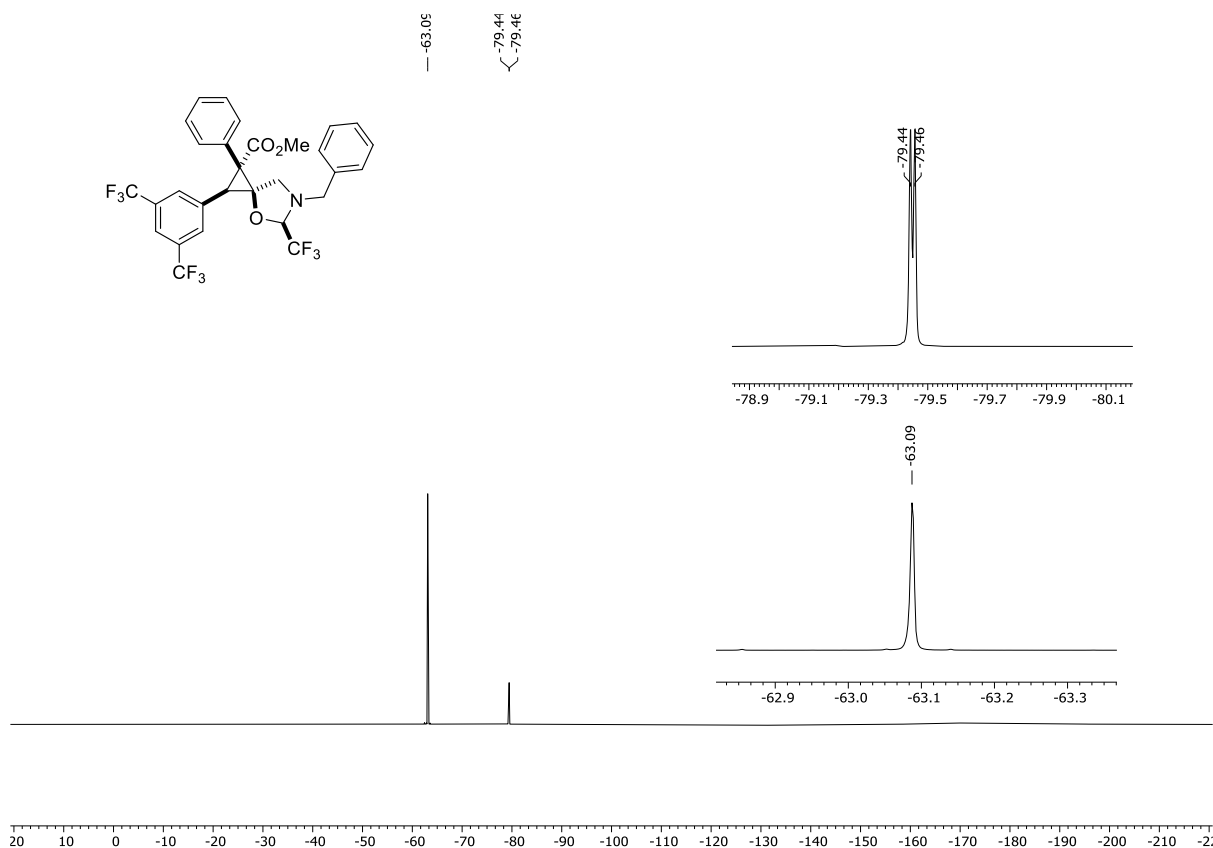

**$^1\text{H}$  NMR Spectrum of 453 6u (400 MHz,  $\text{CDCl}_3$ )**

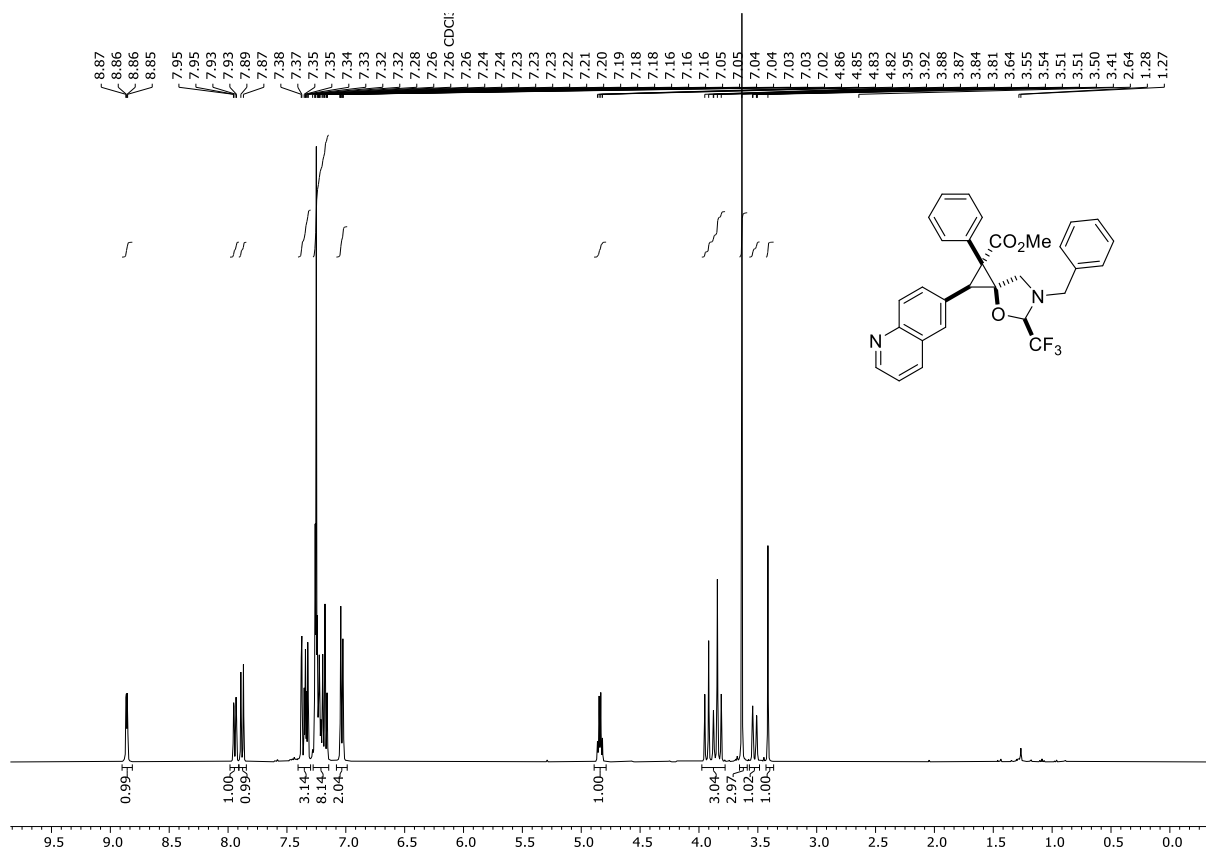

**<sup>13</sup>C NMR Spectrum of 6u (101 MHz, CDCl<sub>3</sub>)**

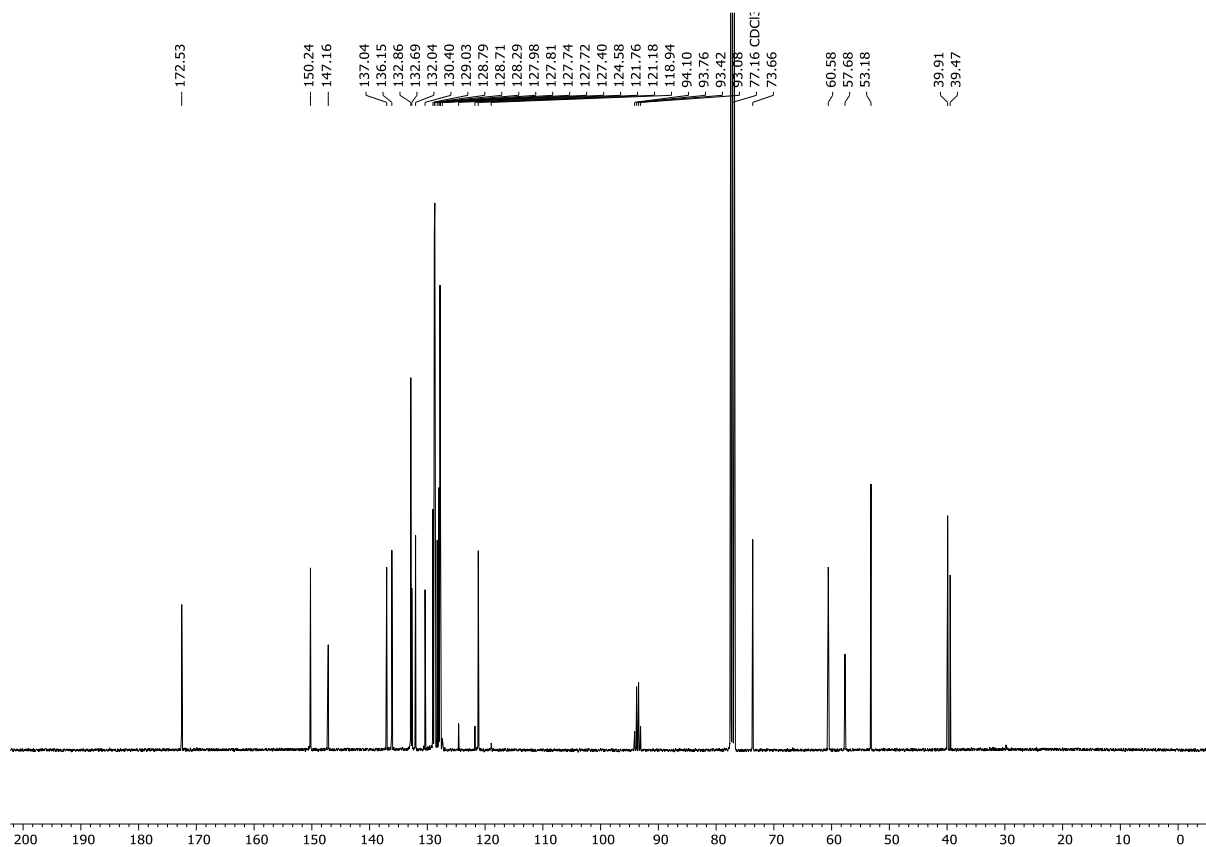

**<sup>19</sup>F NMR Spectrum of 6u (376 MHz, CDCl<sub>3</sub>)**

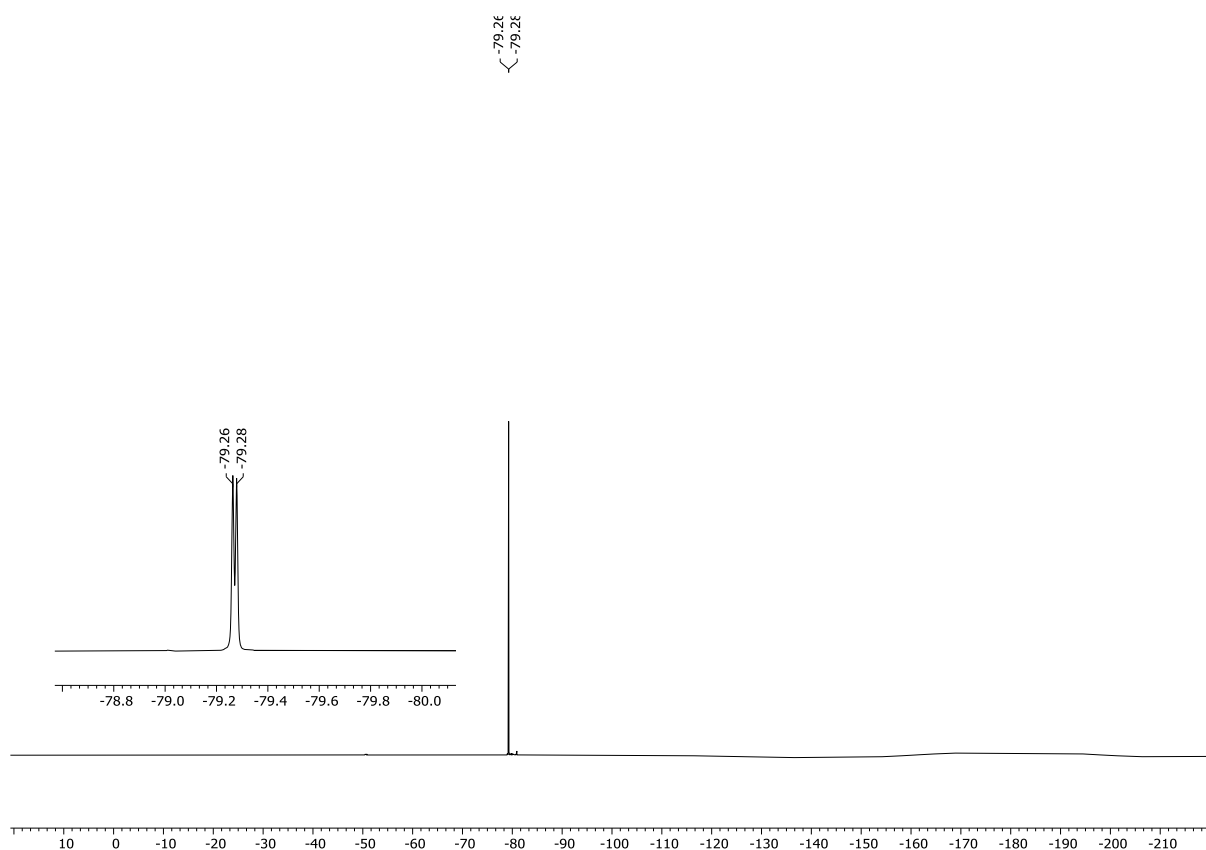

$^1\text{H}$  NMR Spectrum of 6v (400 MHz,  $\text{CDCl}_3$ )

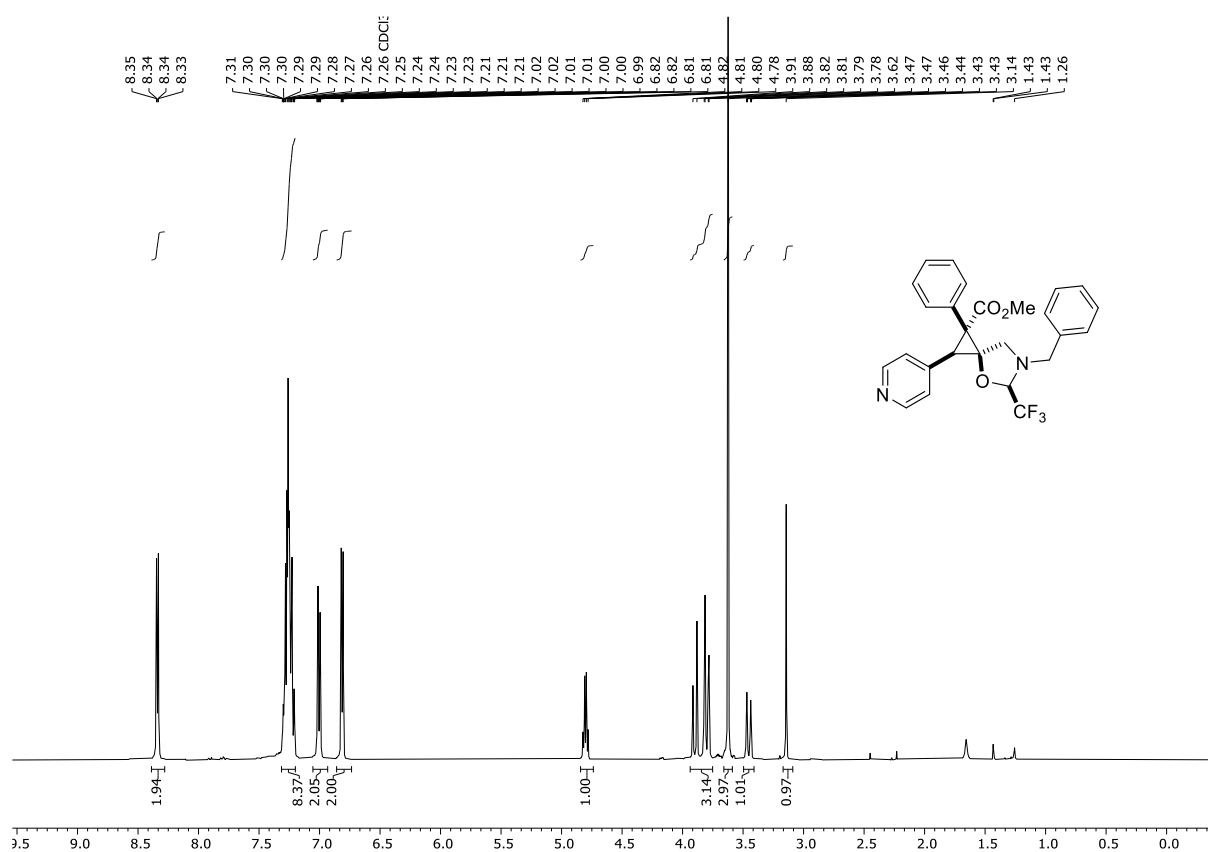

**$^{13}\text{C}$  NMR Spectrum of 6v (101 MHz,  $\text{CDCl}_3$ )**

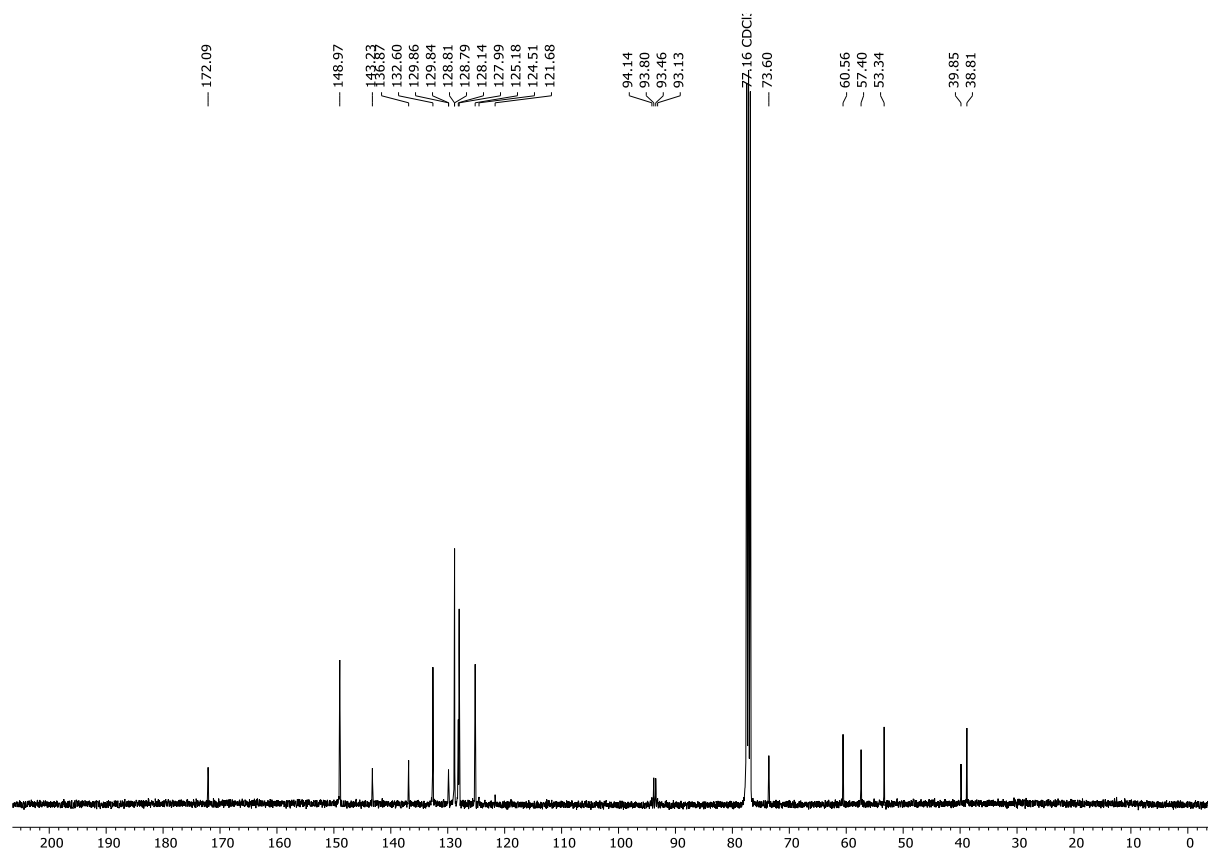

**$^{19}\text{F}$  NMR Spectrum of 6v (376 MHz,  $\text{CDCl}_3$ )**

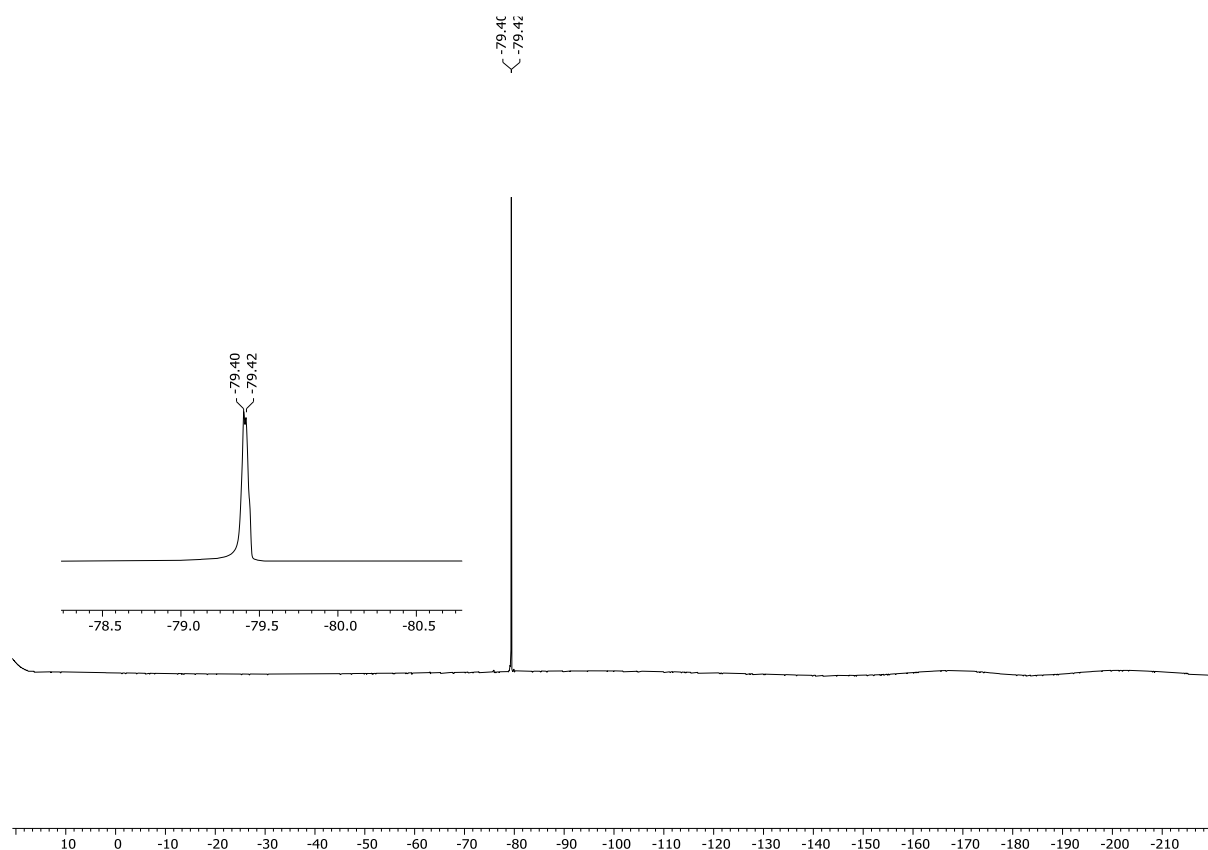

**$^1\text{H}$  NMR Spectrum of 6w (400 MHz,  $\text{CDCl}_3$ )**



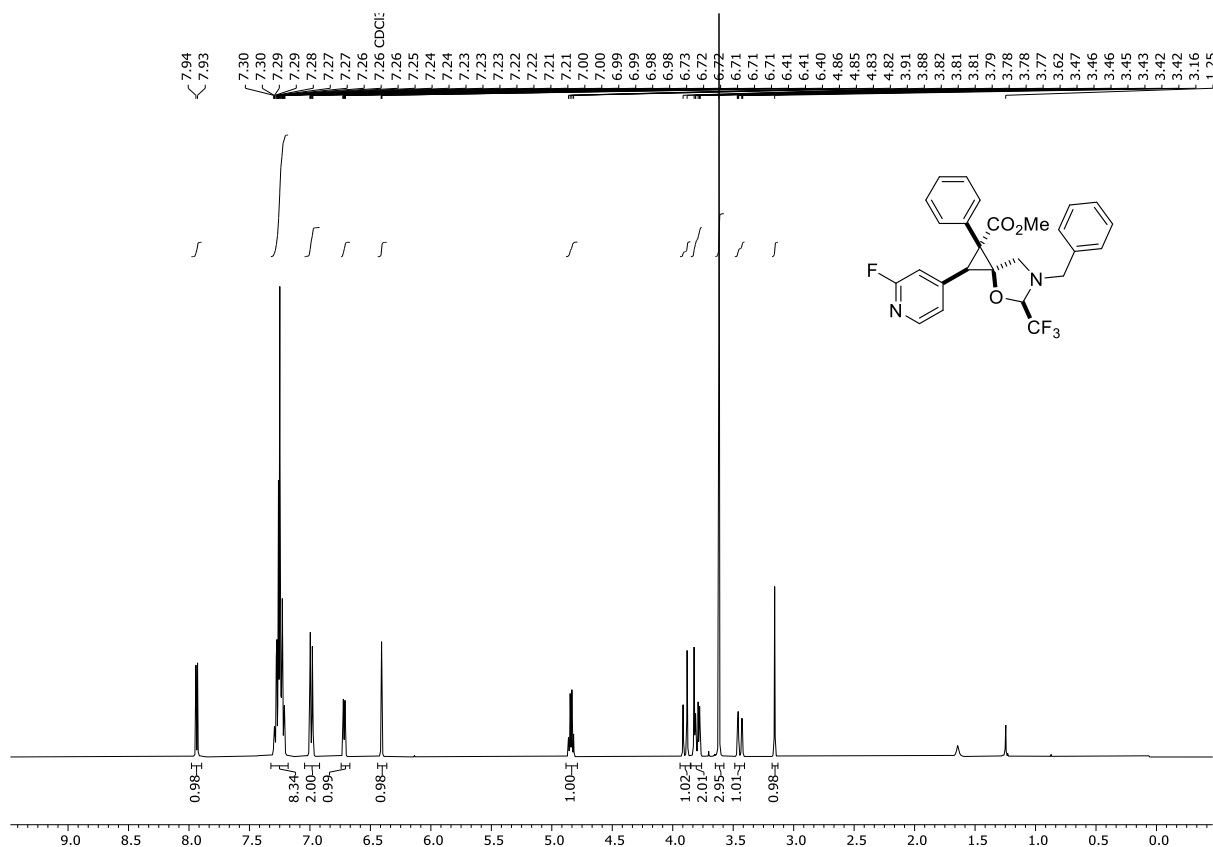

**<sup>13</sup>C NMR Spectrum of 6w (101 MHz, CDCl<sub>3</sub>)**

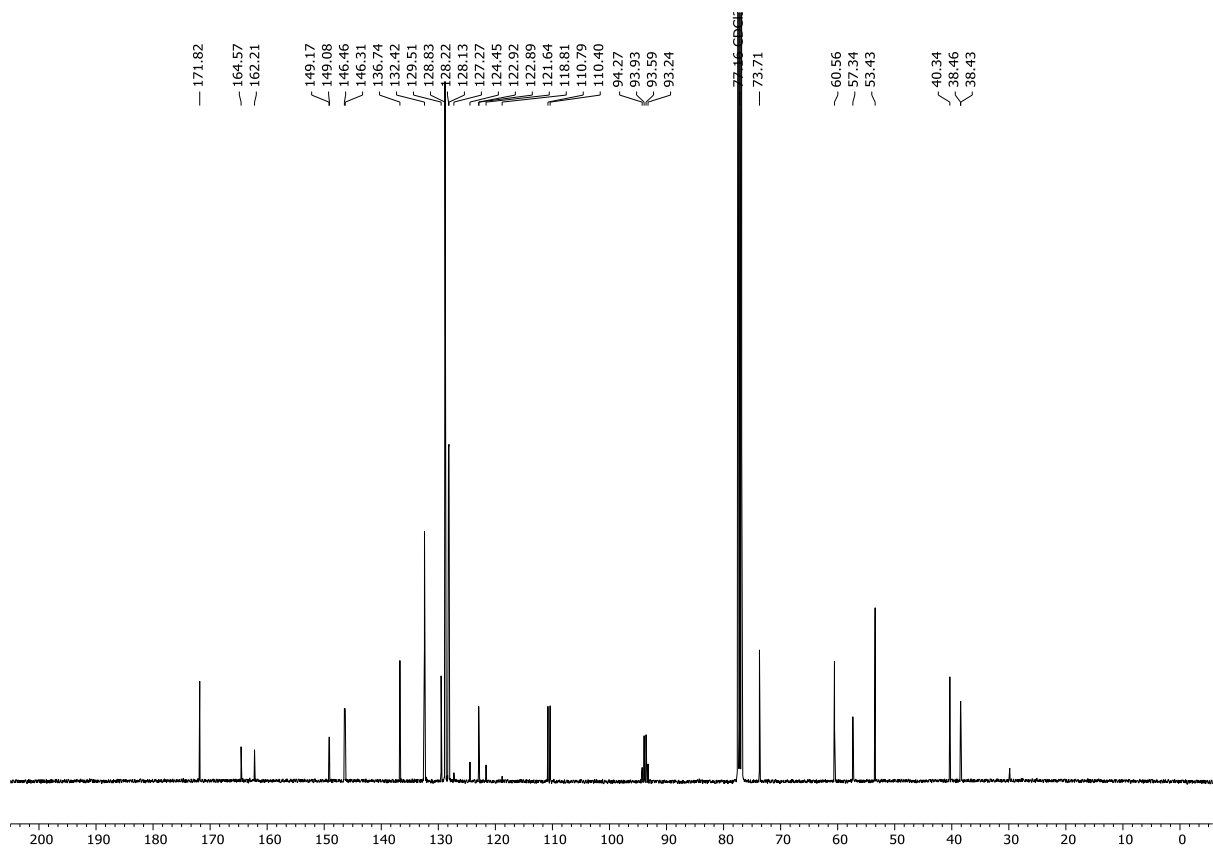

**<sup>19</sup>F NMR Spectrum of 6w (376 MHz, CDCl<sub>3</sub>)**

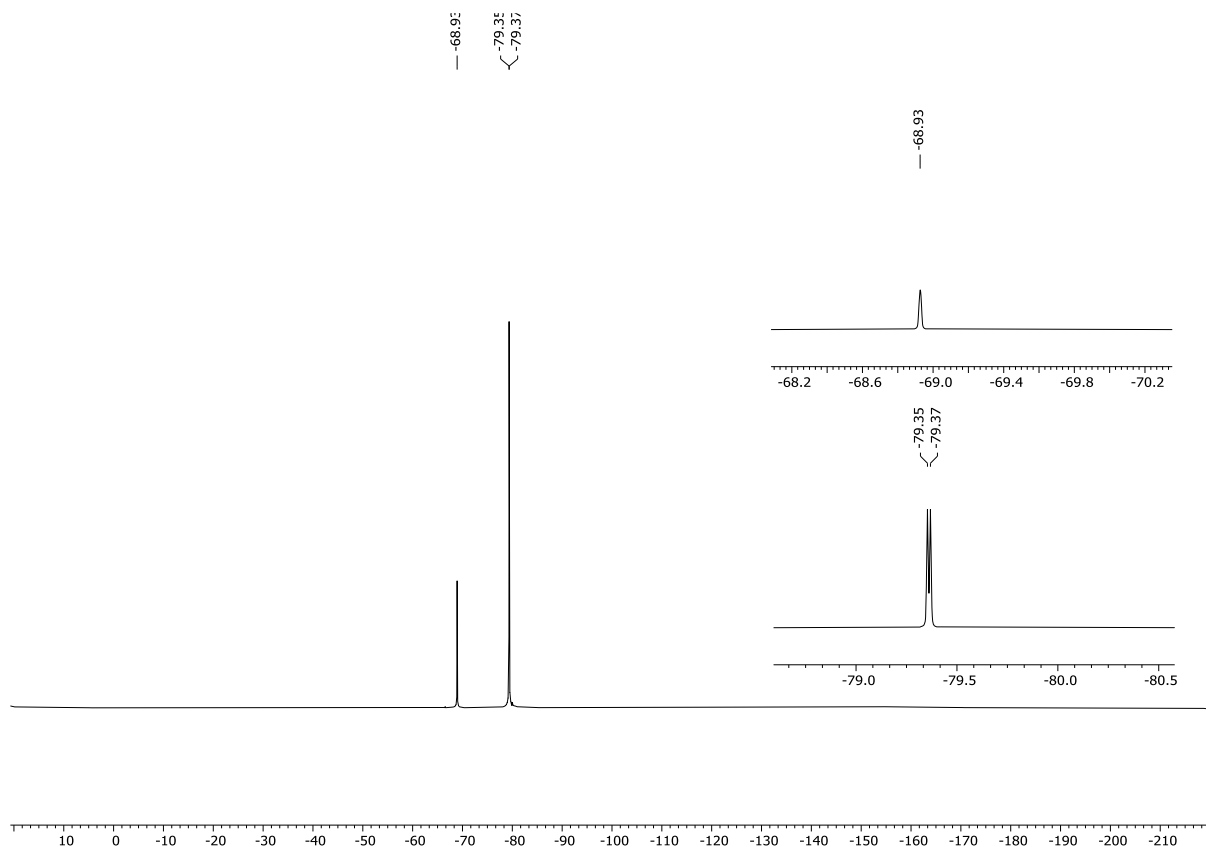

$^1\text{H}$  NMR Spectrum of 6x (400 MHz,  $\text{CDCl}_3$ )

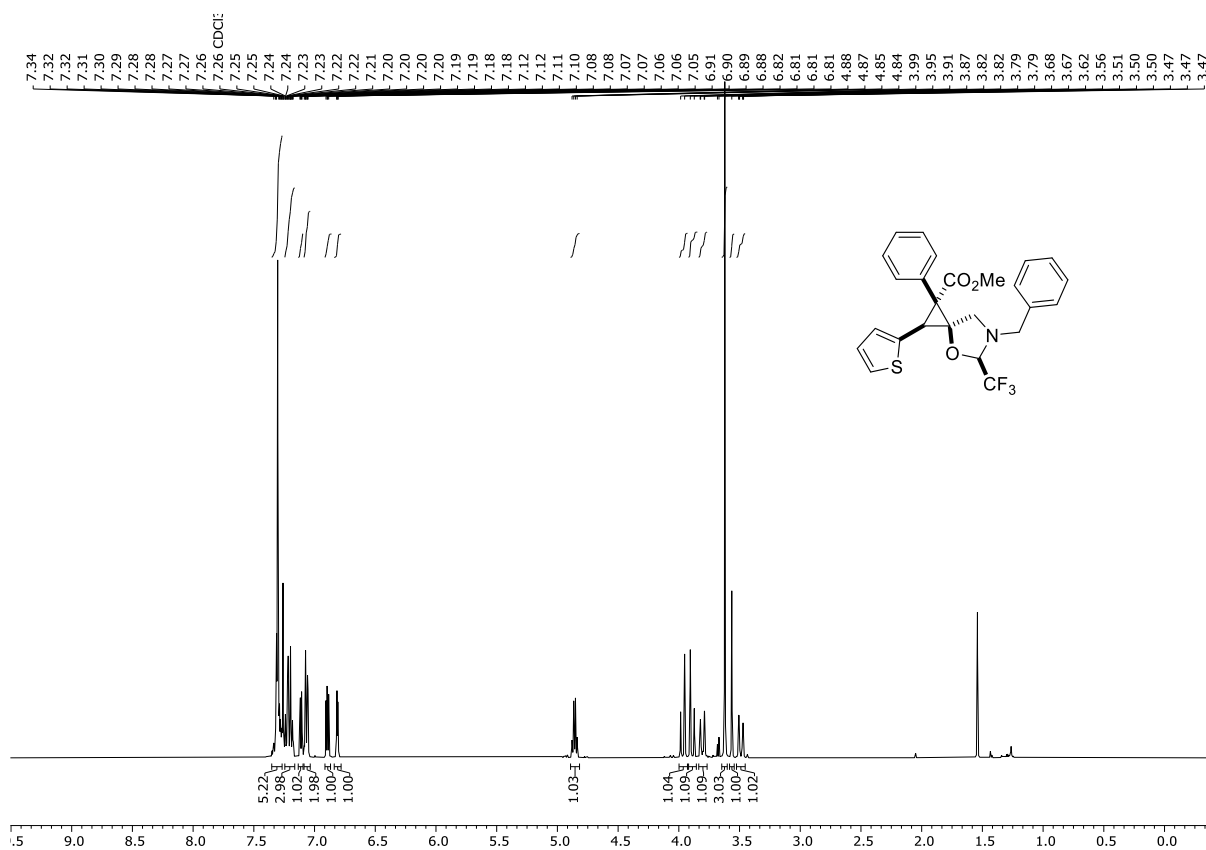

$^{13}\text{C}$  NMR Spectrum of 6x (101 MHz,  $\text{CDCl}_3$ )

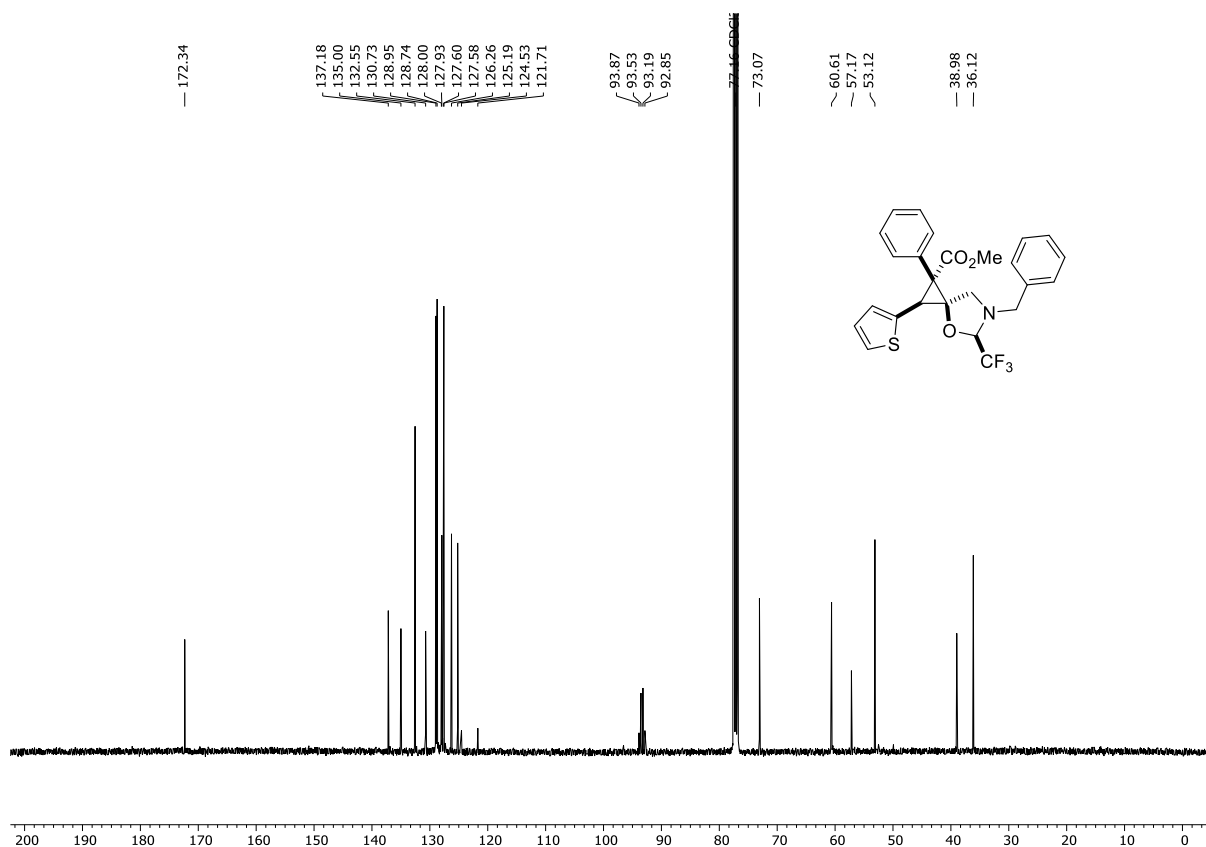

**<sup>19</sup>F NMR Spectrum of 6x (376 MHz, CDCl<sub>3</sub>)**

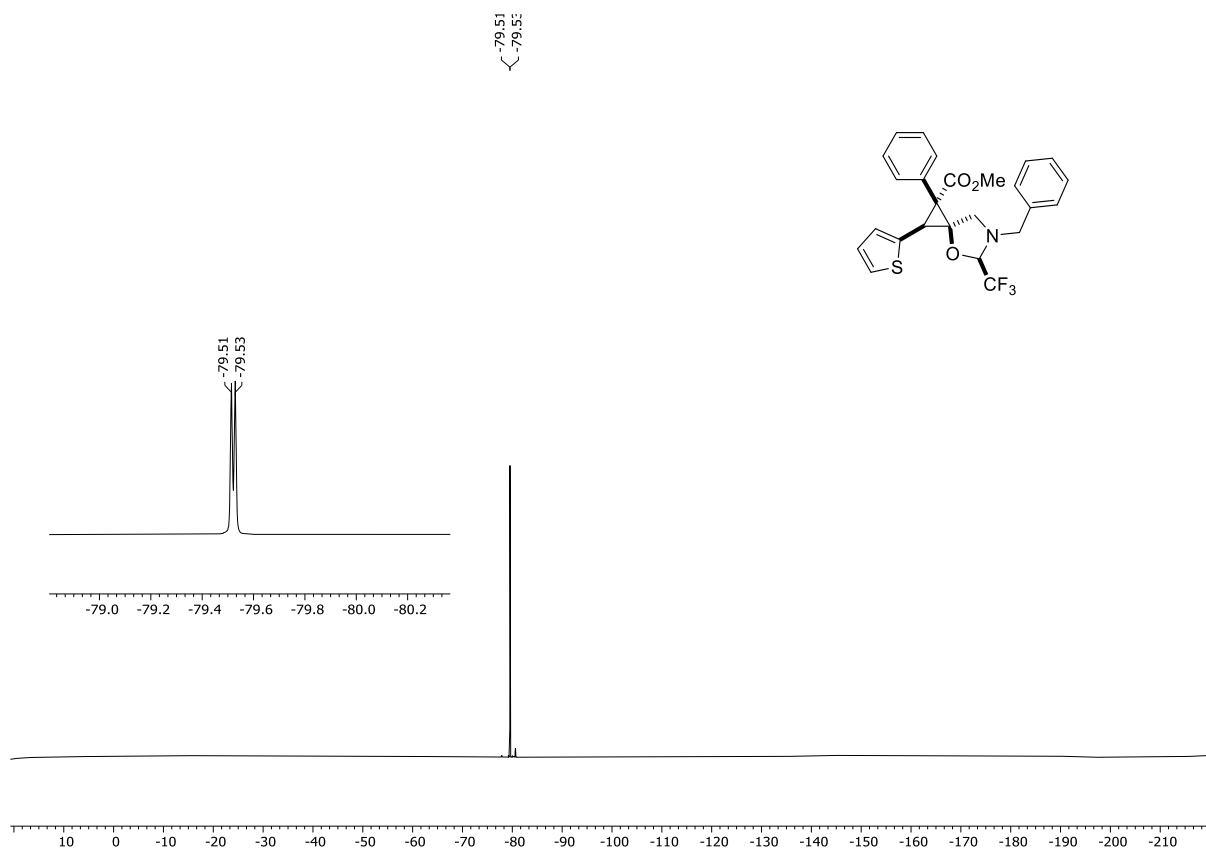

**<sup>1</sup>H NMR Spectrum of 7aa (400 MHz, CDCl<sub>3</sub>)**

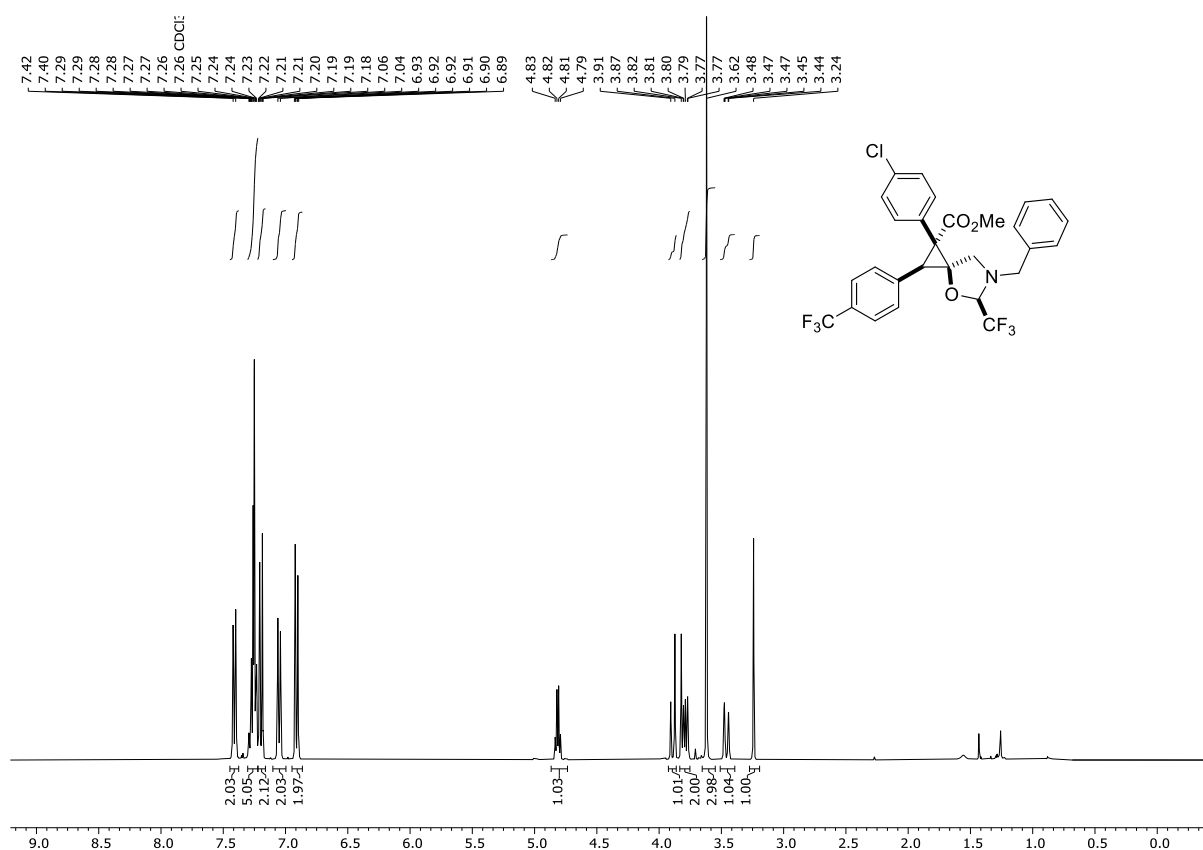

**<sup>13</sup>C NMR Spectrum of 7aa (101 MHz, CDCl<sub>3</sub>)**

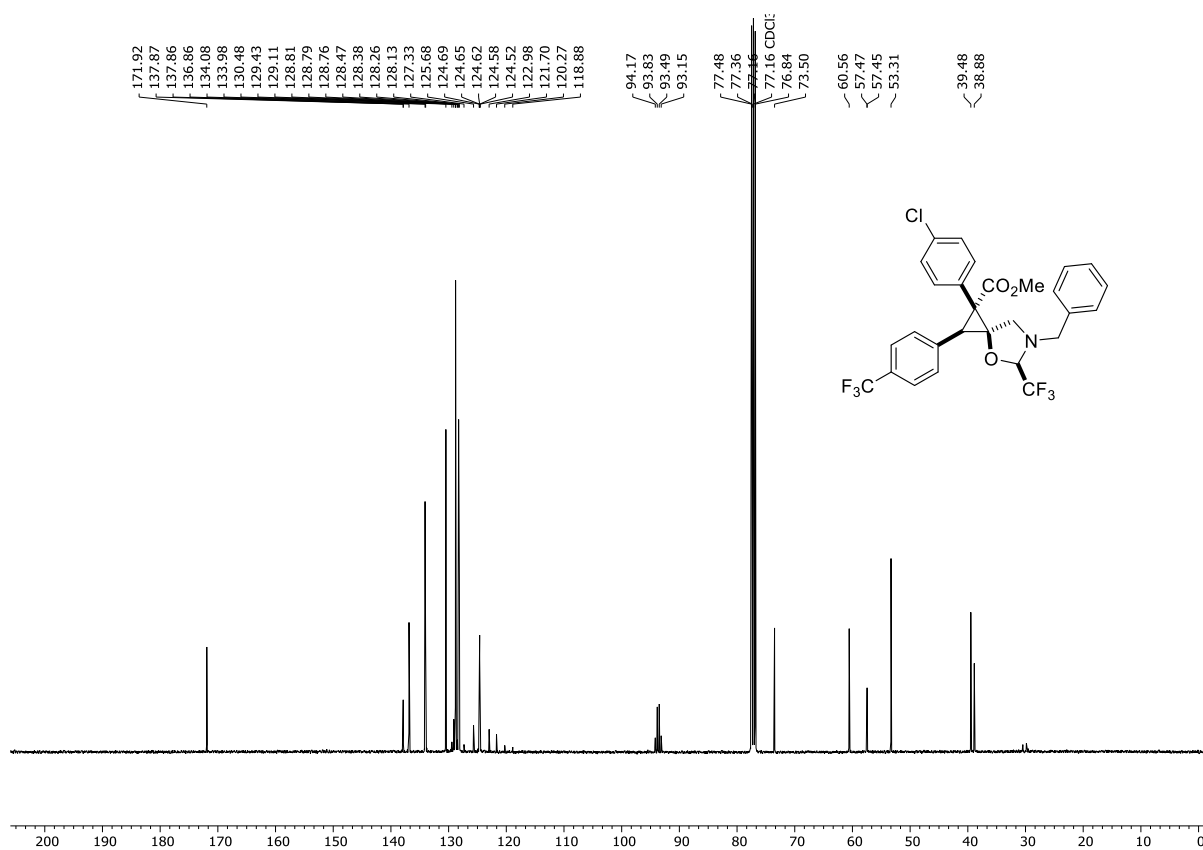

**<sup>19</sup>F NMR Spectrum of 7aa (376 MHz, CDCl<sub>3</sub>)**

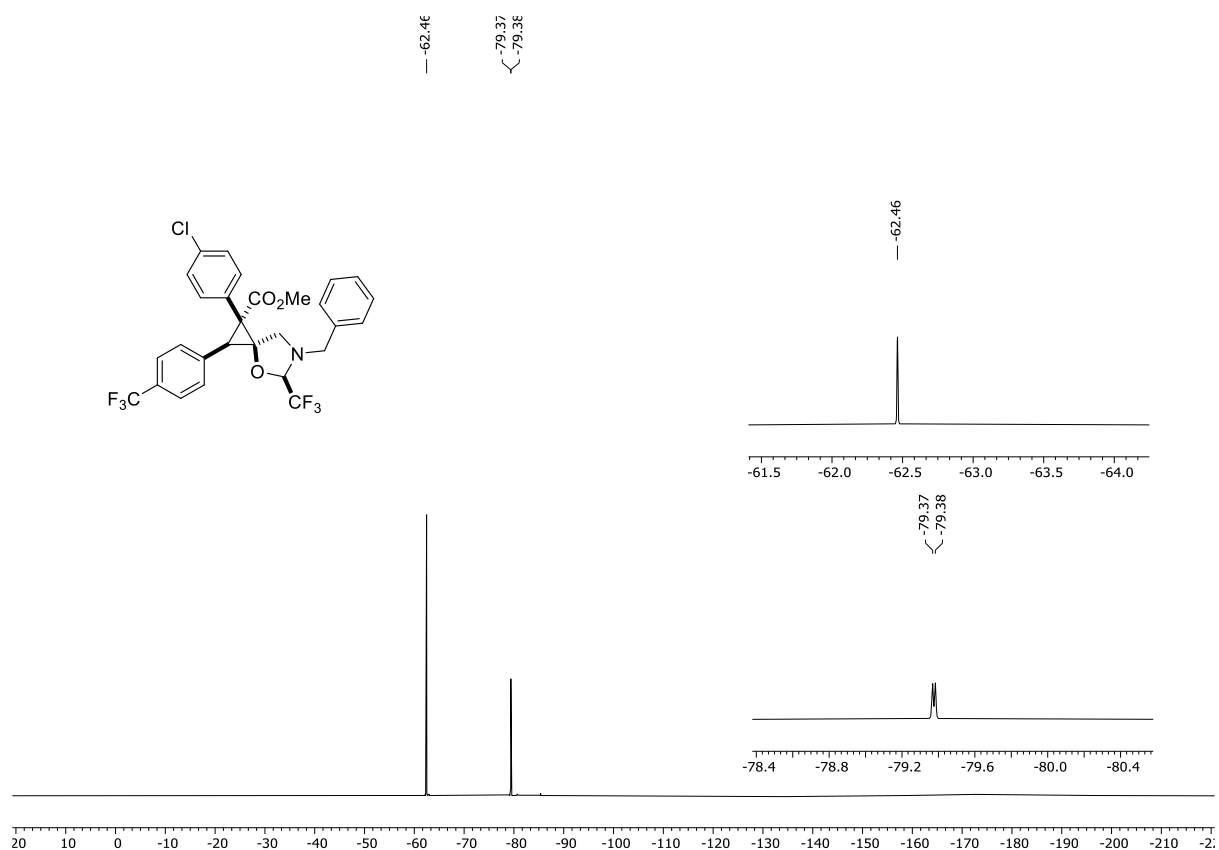

# $^1\text{H}$ NMR Spectrum of 7ab (400 MHz, $\text{CDCl}_3$ )

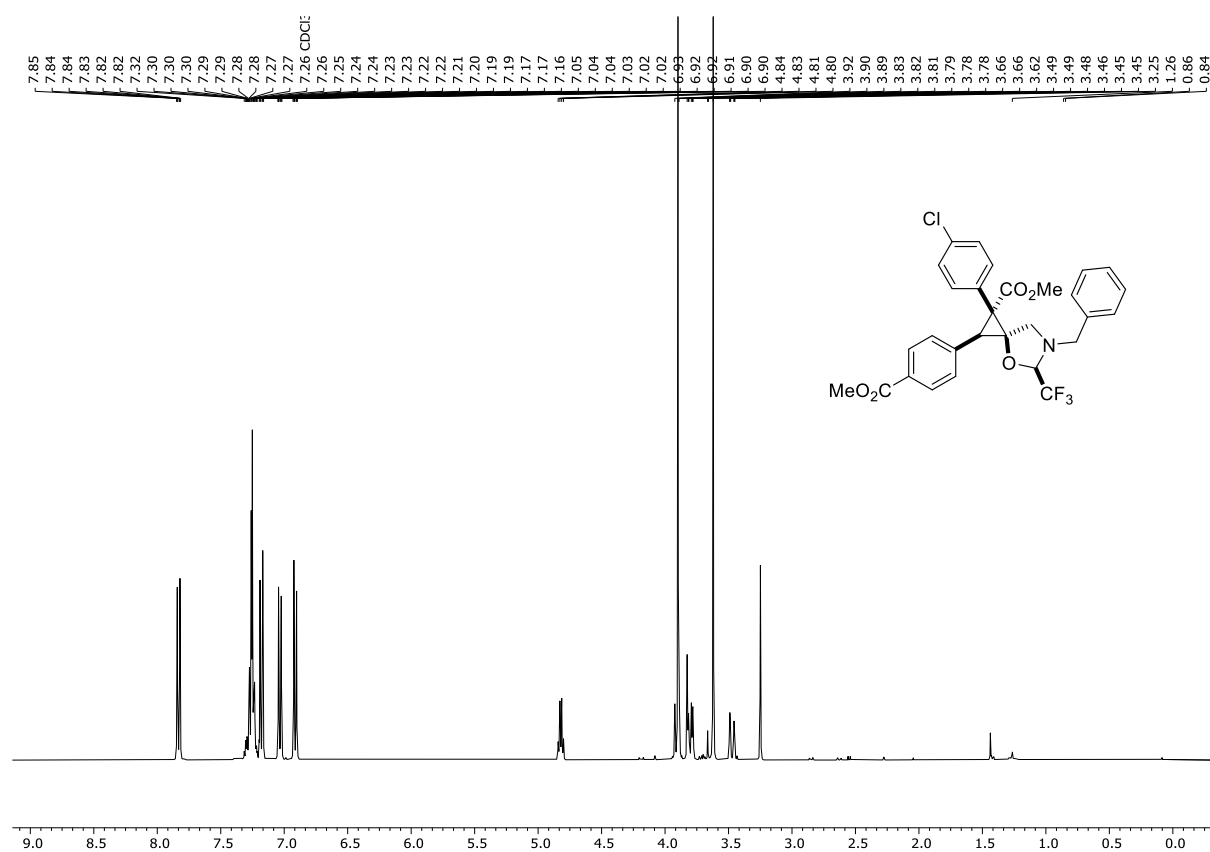

**$^{13}\text{C}$  NMR Spectrum of 7ab (101 MHz,  $\text{CDCl}_3$ )**

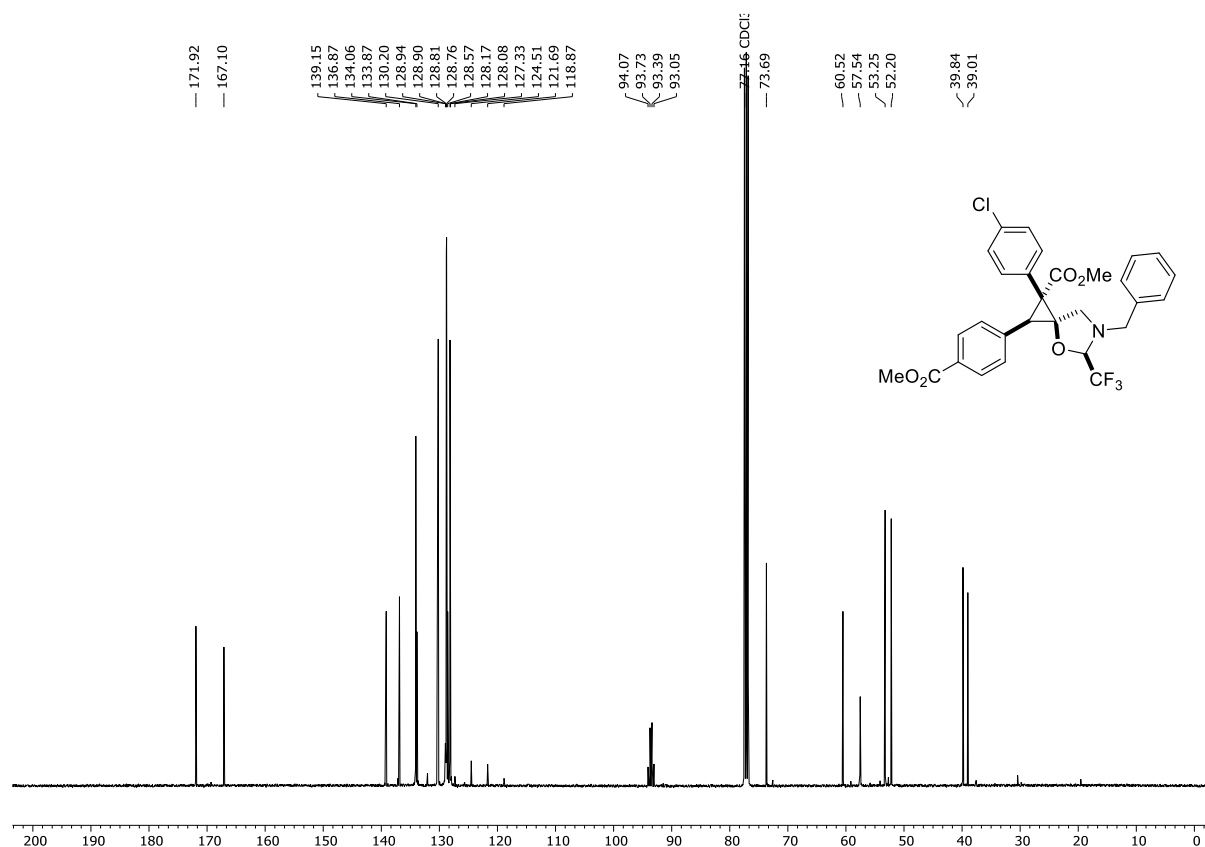

**$^{19}\text{F}$  NMR Spectrum of 7ab (376 MHz,  $\text{CDCl}_3$ )**

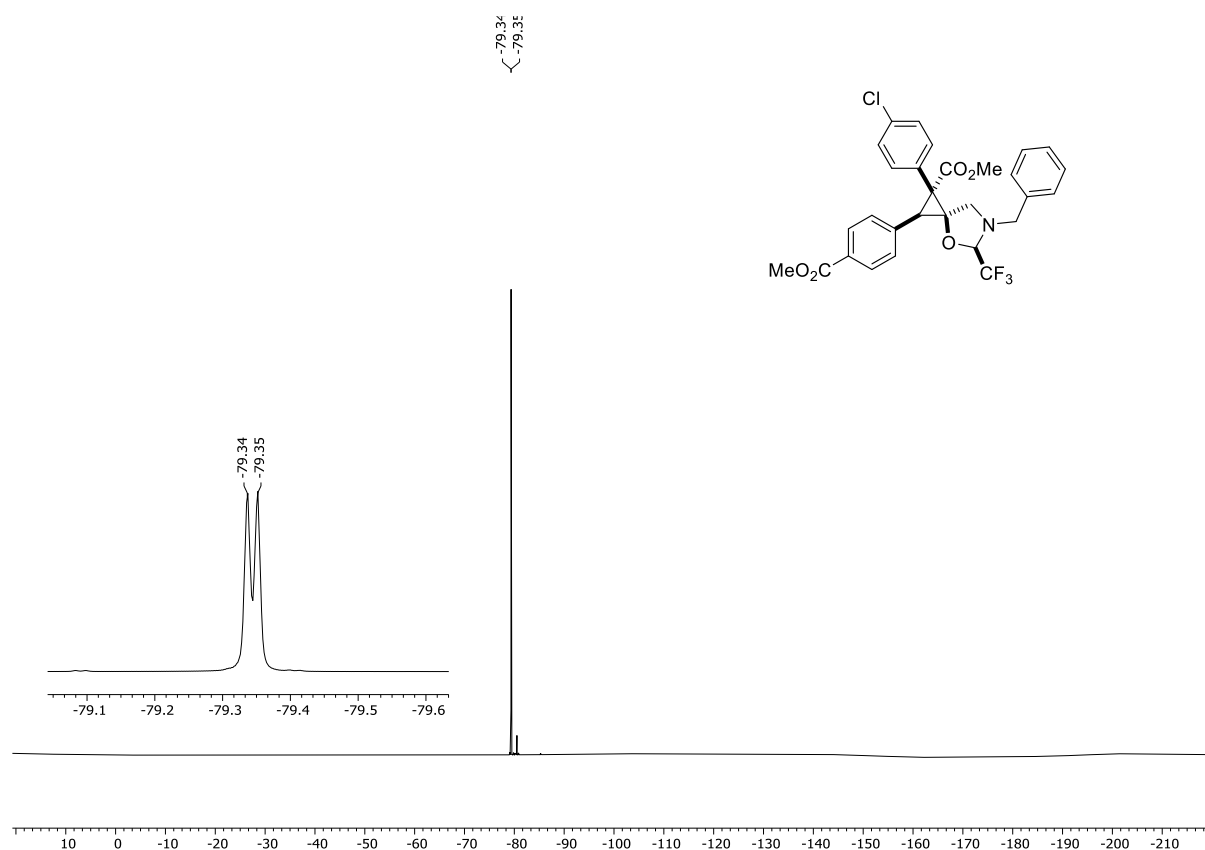

**$^1\text{H}$  NMR Spectrum of 7ac (400 MHz,  $\text{CDCl}_3$ )**

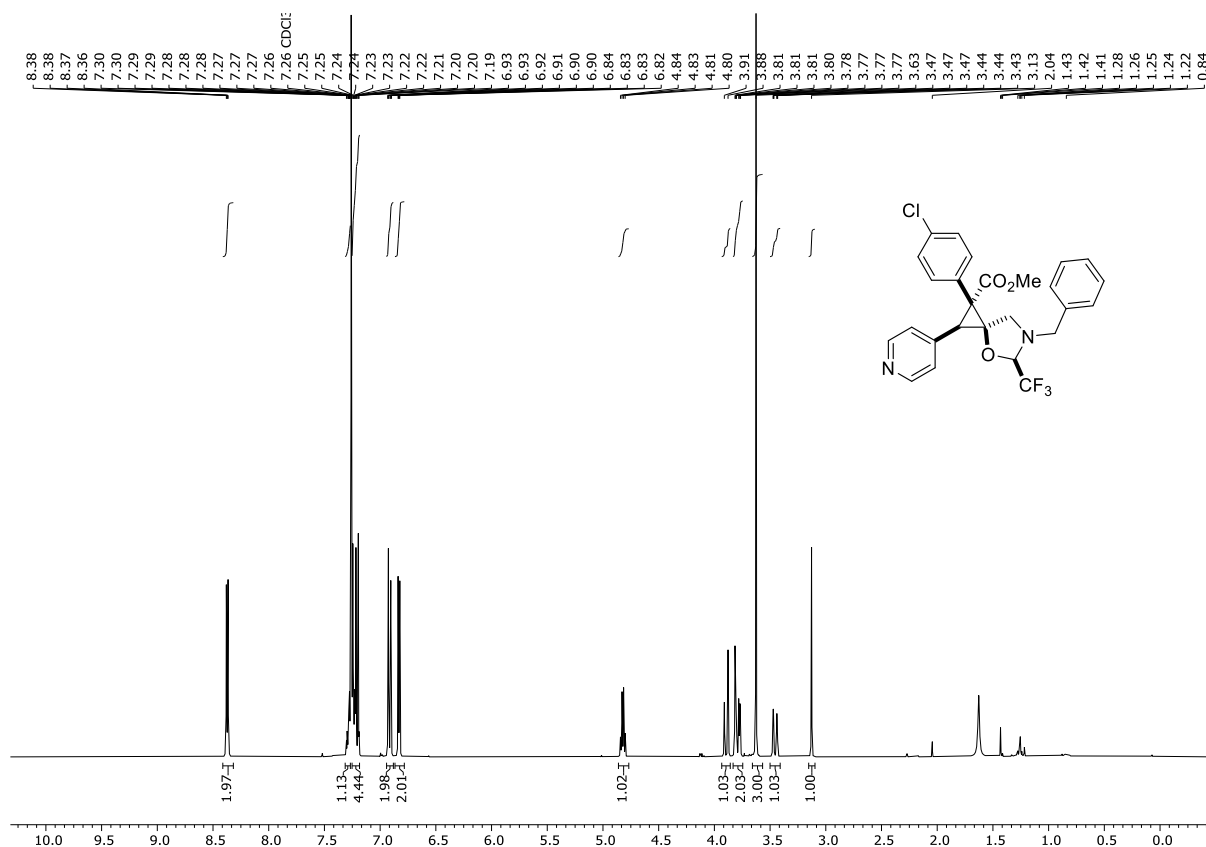

**<sup>13</sup>C NMR Spectrum of 7ac (101 MHz, CDCl<sub>3</sub>)**

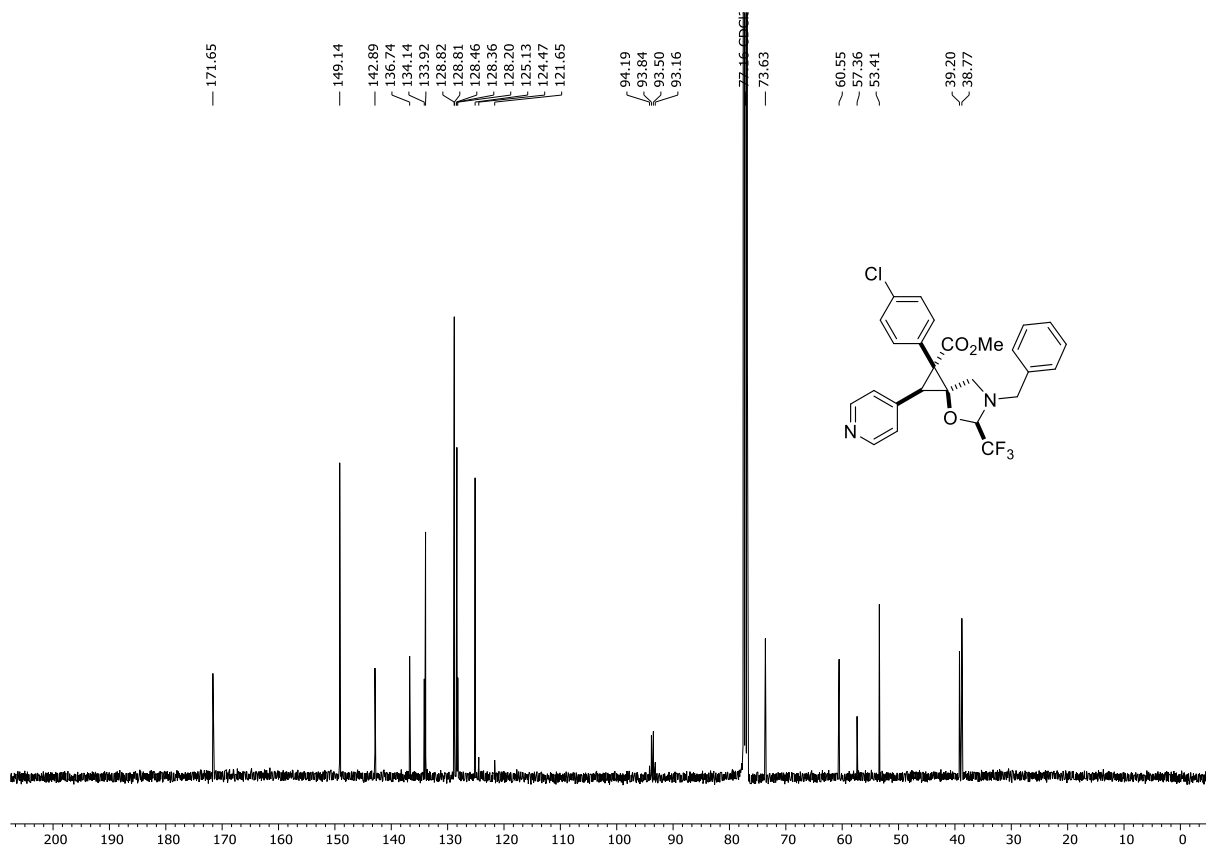

**<sup>19</sup>F NMR Spectrum of 7ac (376 MHz, CDCl<sub>3</sub>)**

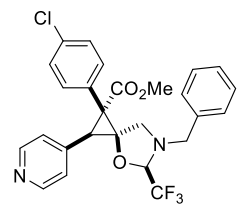

Chemical structure of compound 10 is shown in the inset. The structure is a bicyclic compound with a trifluoromethyl group (CF<sub>3</sub>) and a methoxycarbonyl group (CO<sub>2</sub>Me) attached to the ring. The structure is labeled with 'MeO' and 'F<sub>3</sub>C'.



**$^{13}\text{C}$  NMR Spectrum of 7b (101 MHz,  $\text{CDCl}_3$ )**

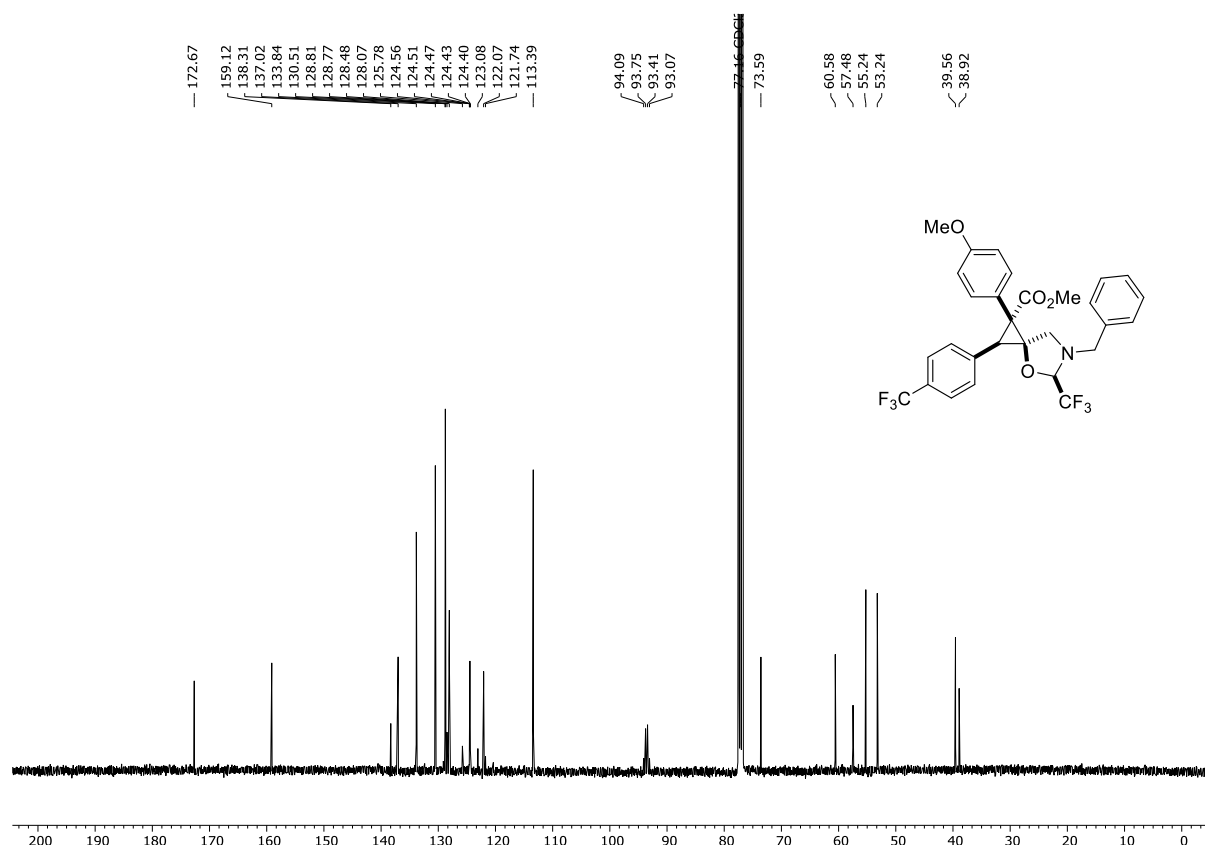

**$^{19}\text{F}$  NMR Spectrum of 7b (376 MHz,  $\text{CDCl}_3$ )**

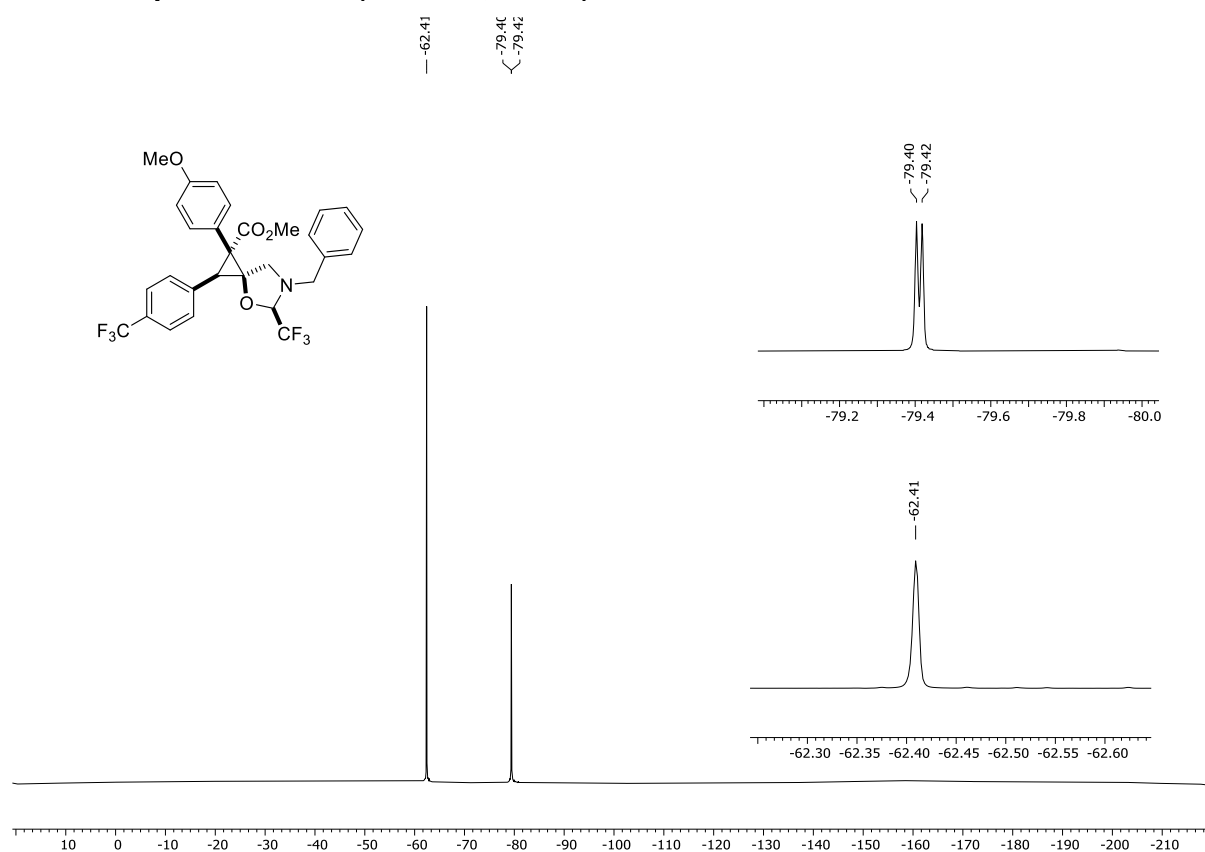

# <sup>1</sup>H NMR Spectrum of 7c (400 MHz, CDCl<sub>3</sub>)

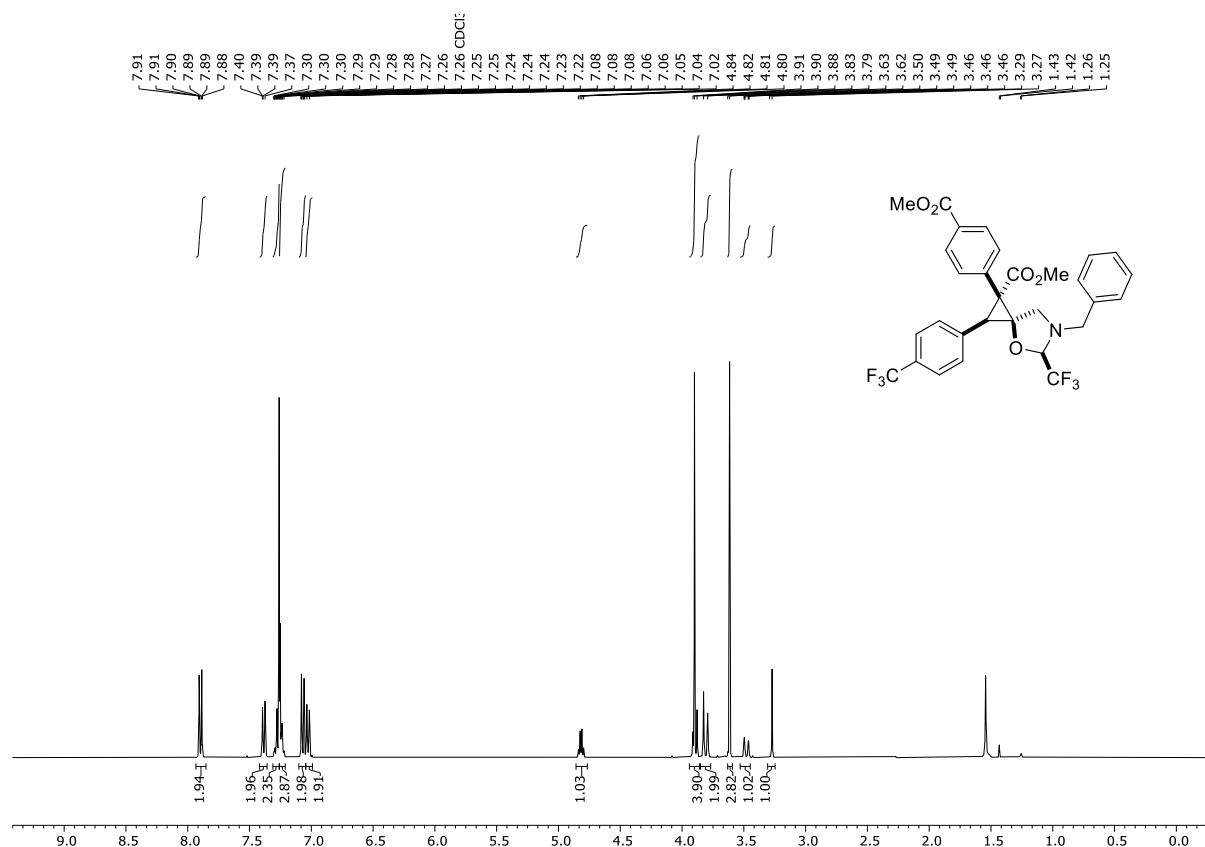

# <sup>13</sup>C NMR Spectrum of 7c (101 MHz, CDCl<sub>3</sub>)

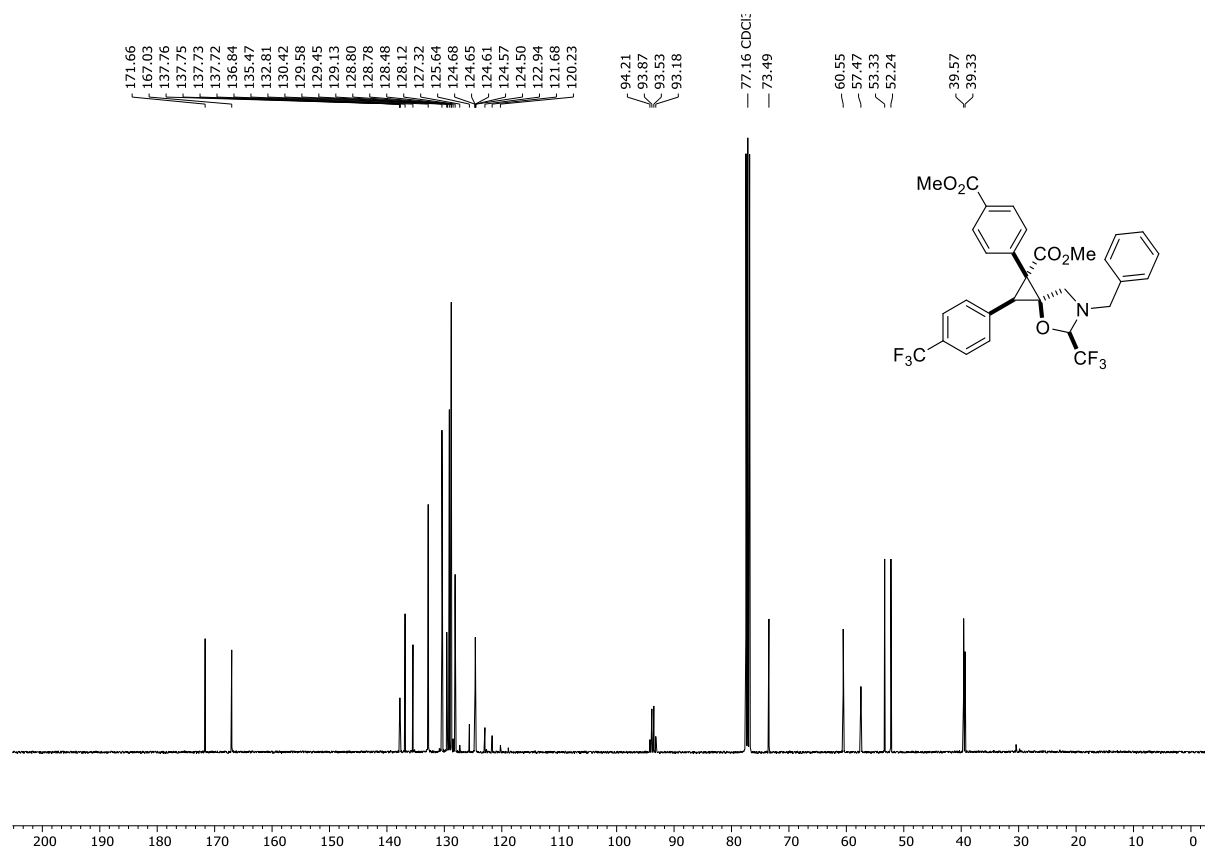

**$^{19}\text{F}$  NMR Spectrum of 7c (376 MHz,  $\text{CDCl}_3$ )**

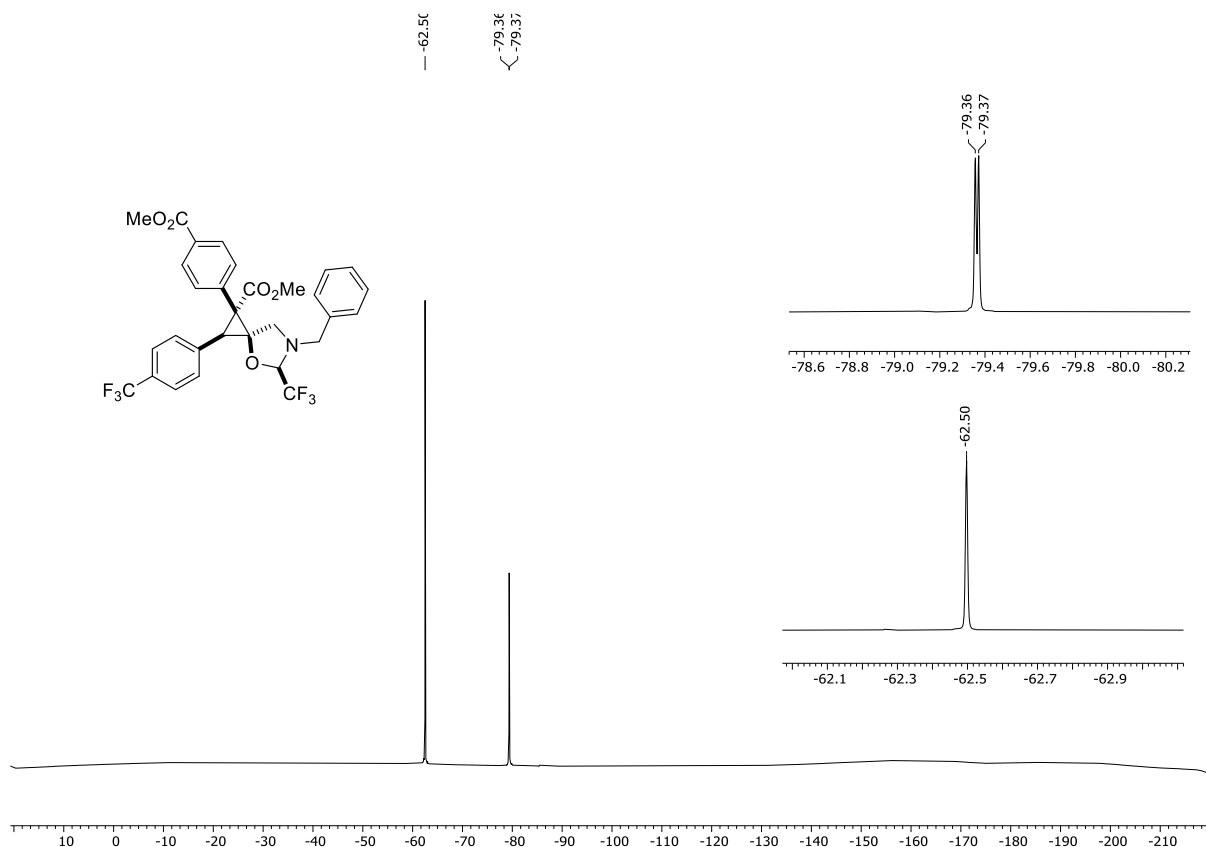

**$^1\text{H}$  NMR Spectrum of 7d (400 MHz,  $\text{CDCl}_3$ )**

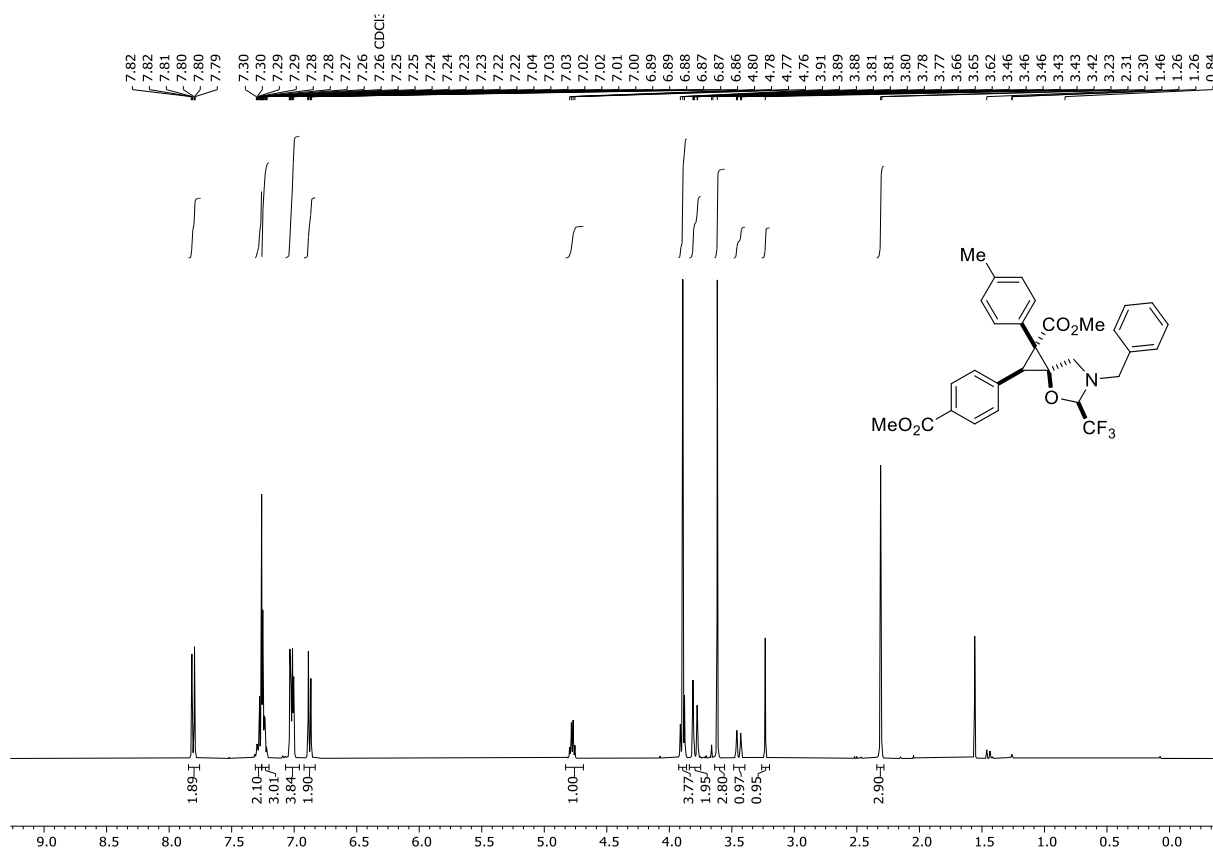

**$^{13}\text{C}$  NMR Spectrum of 7d (101 MHz,  $\text{CDCl}_3$ )**

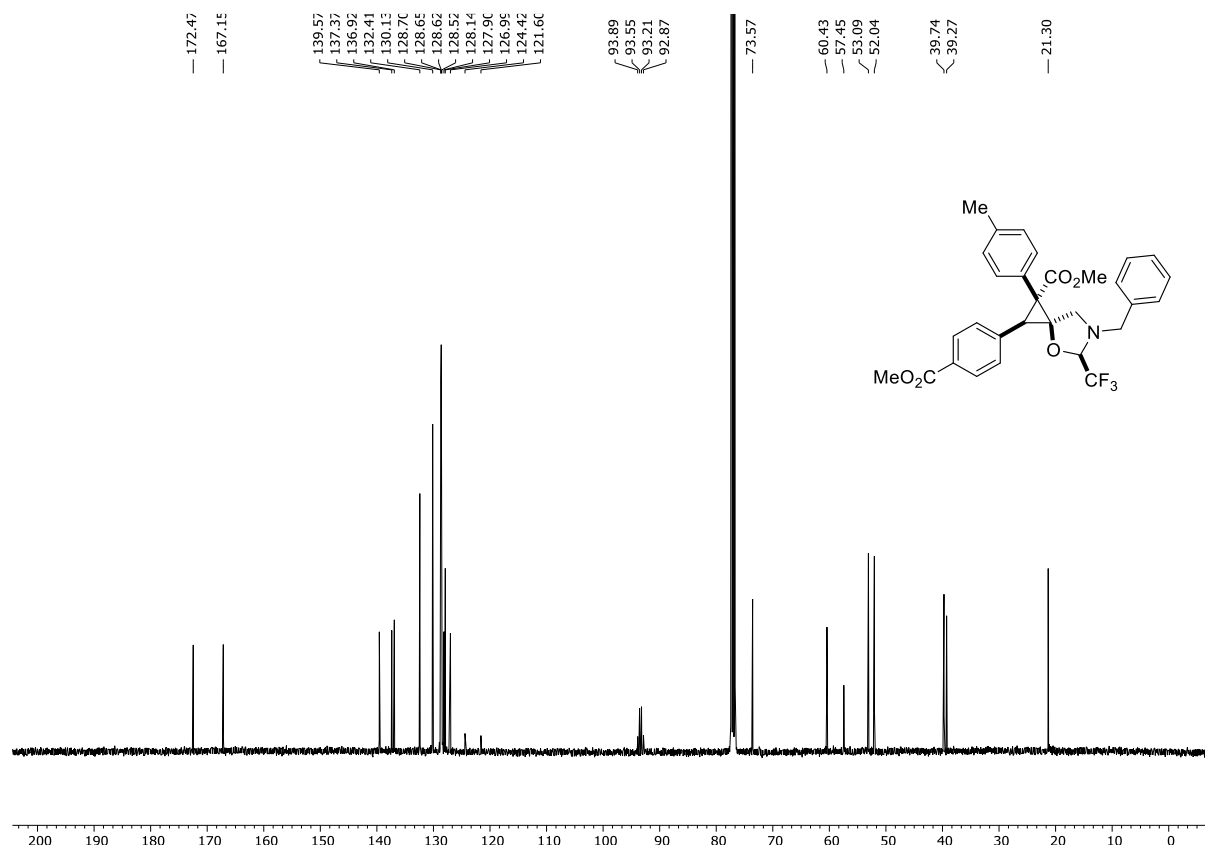

**$^{19}\text{F}$  NMR Spectrum of 7d (376 MHz,  $\text{CDCl}_3$ )**

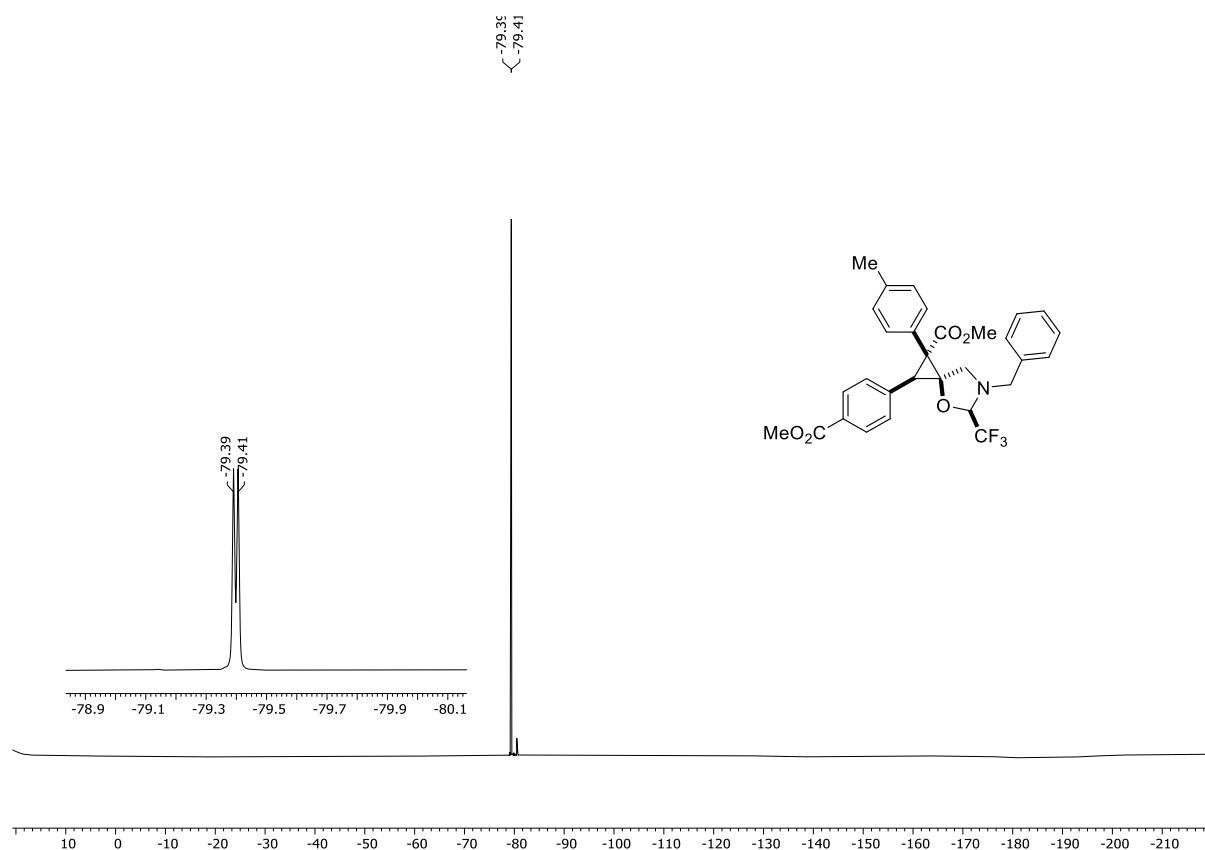

**$^1\text{H}$  NMR Spectrum of 7e (400 MHz,  $\text{CDCl}_3$ )**

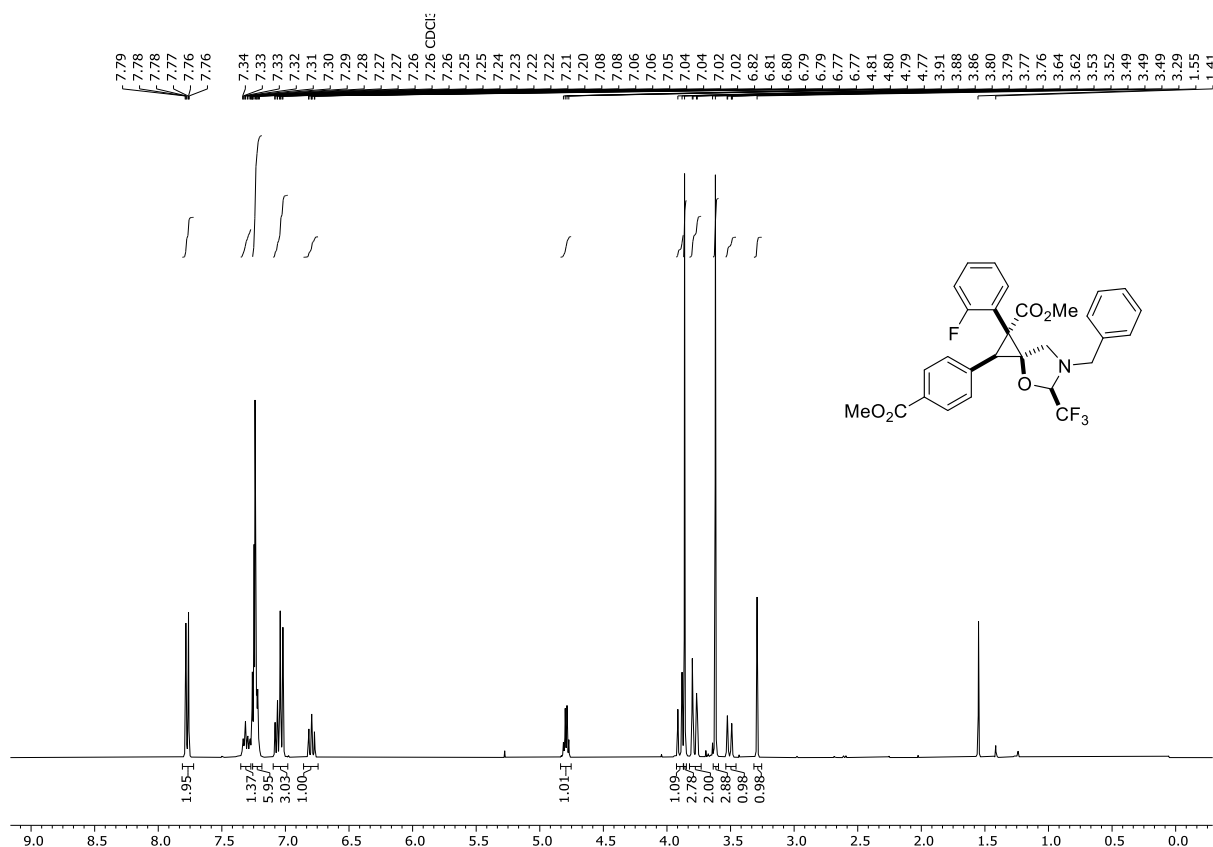

**<sup>13</sup>C NMR Spectrum of 7e (101 MHz, CDCl<sub>3</sub>)**

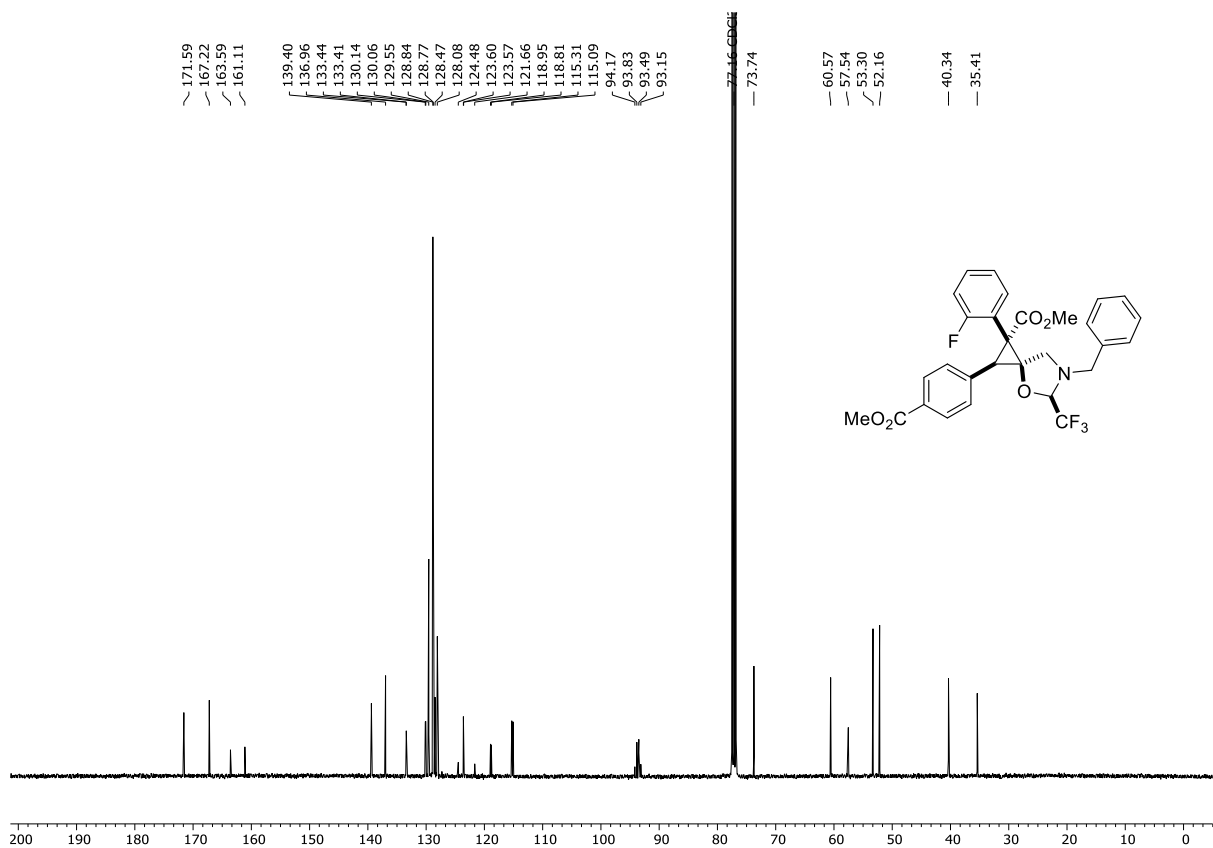

**<sup>19</sup>F NMR Spectrum of 7e (376 MHz, CDCl<sub>3</sub>)**

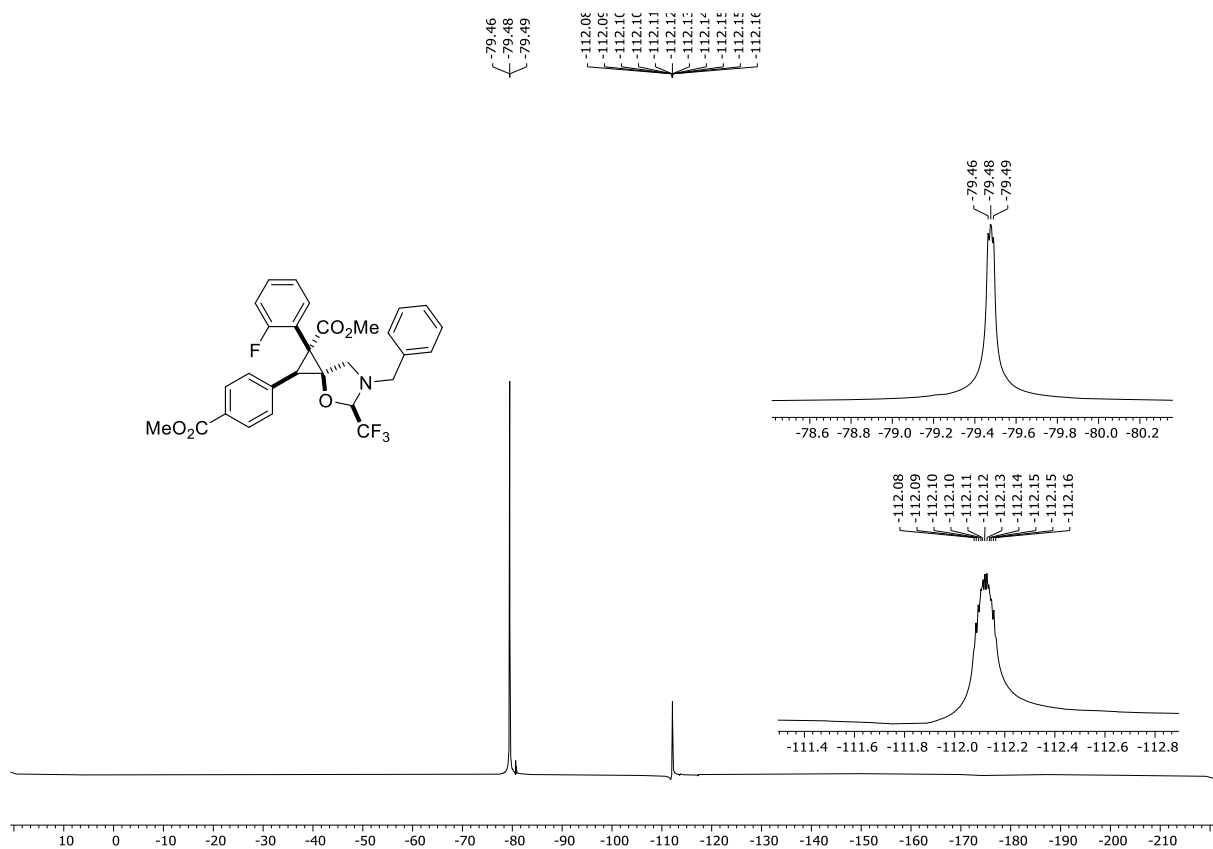

# **<sup>1</sup>H NMR Spectrum of 7f (400 MHz, CDCl<sub>3</sub>)**

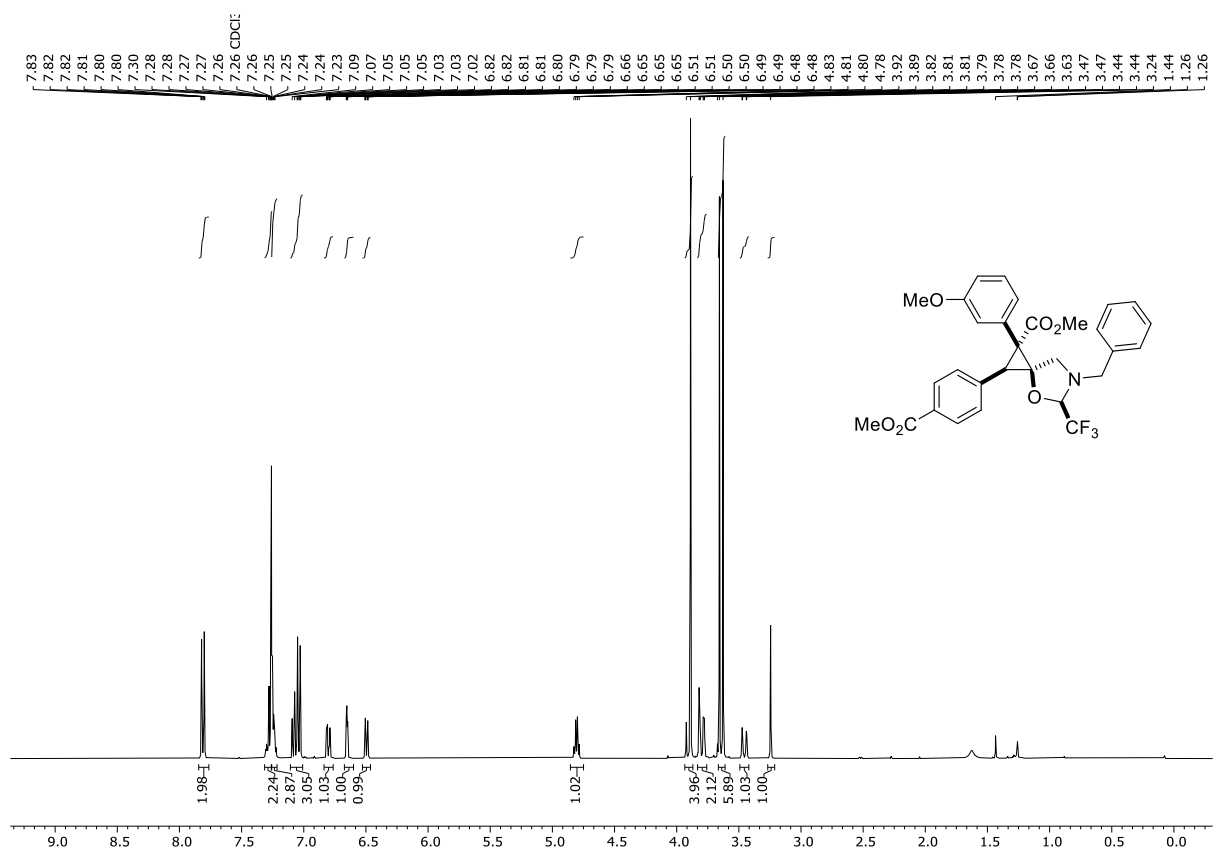

**$^{13}\text{C}$  NMR Spectrum of 7f (101 MHz,  $\text{CDCl}_3$ )**

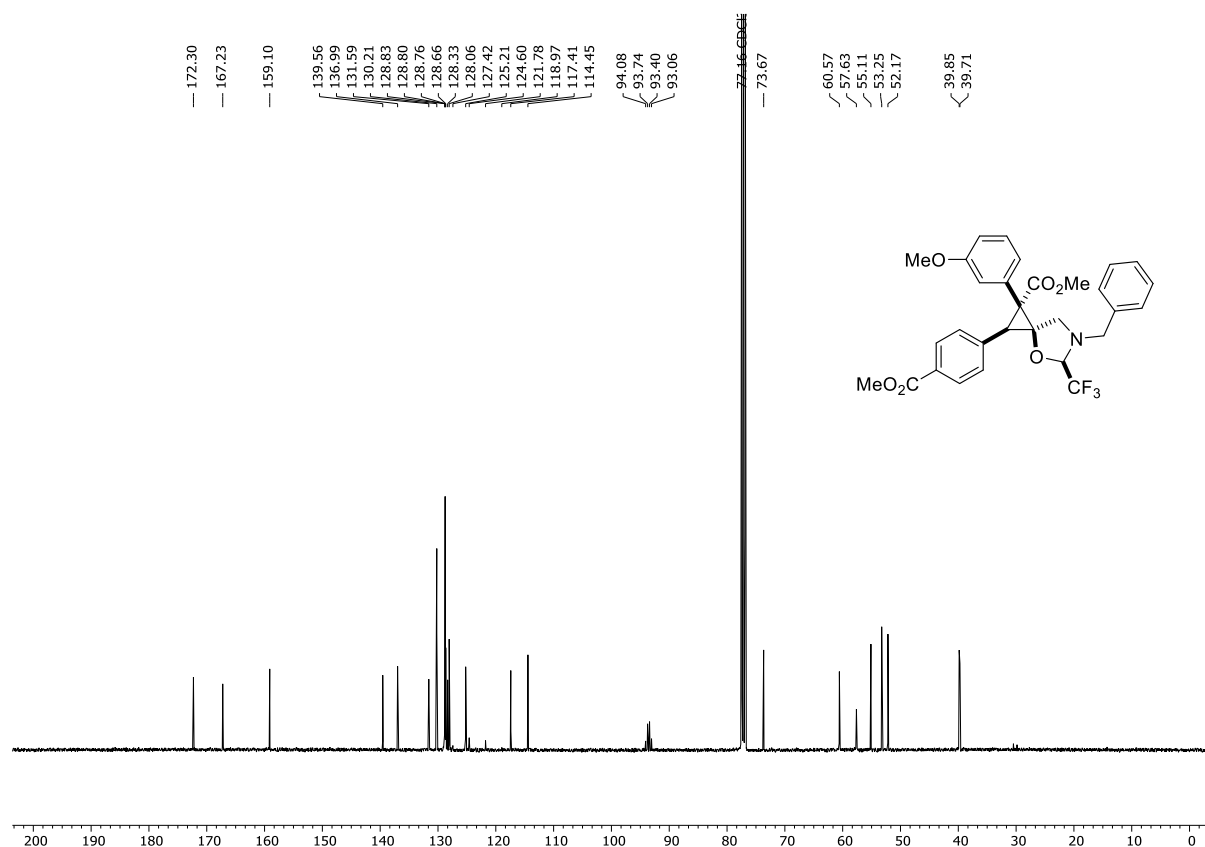

**$^{19}\text{F}$  NMR Spectrum of 7f (376 MHz,  $\text{CDCl}_3$ )**

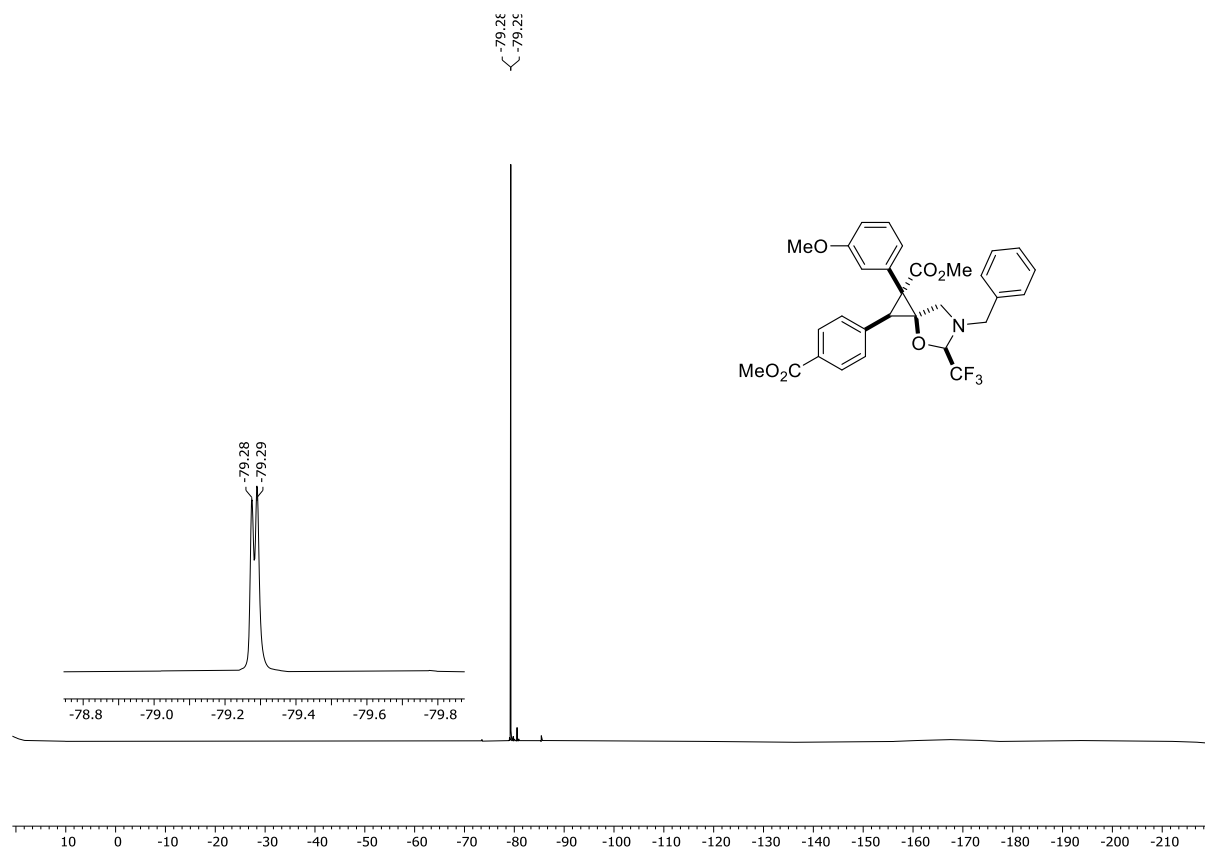

**$^1\text{H}$  NMR Spectrum of 7g (400 MHz,  $\text{CDCl}_3$ )**

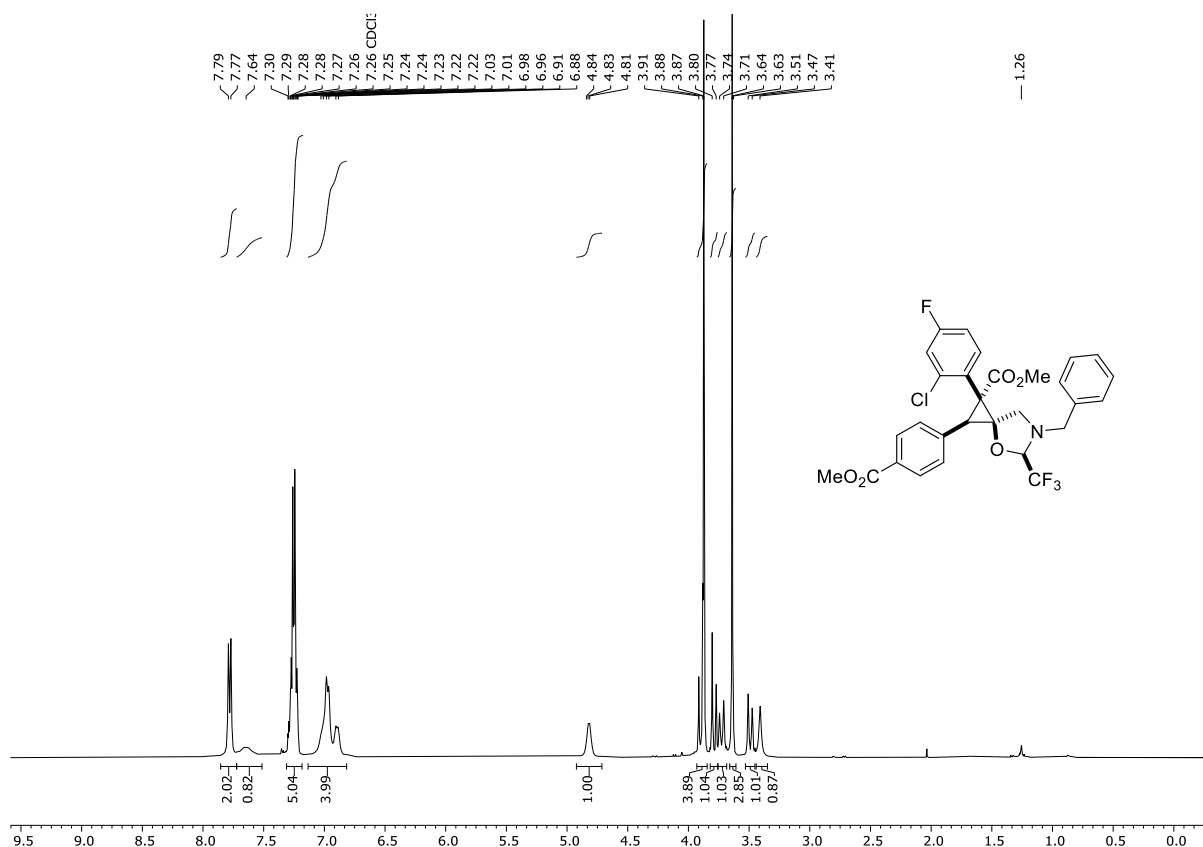

**<sup>13</sup>C NMR Spectrum of 7g (101 MHz, CDCl<sub>3</sub>)**

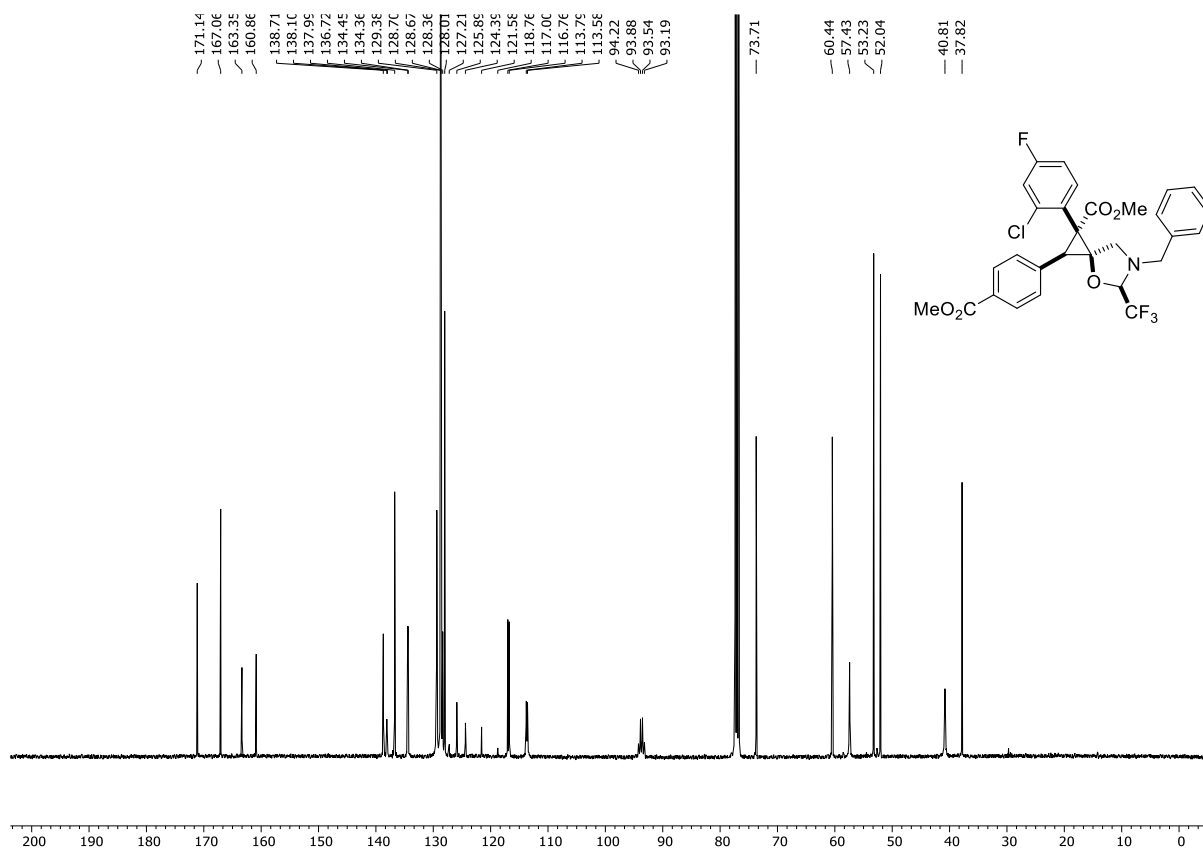

**<sup>19</sup>F NMR Spectrum of 7g (376 MHz, CDCl<sub>3</sub>)**



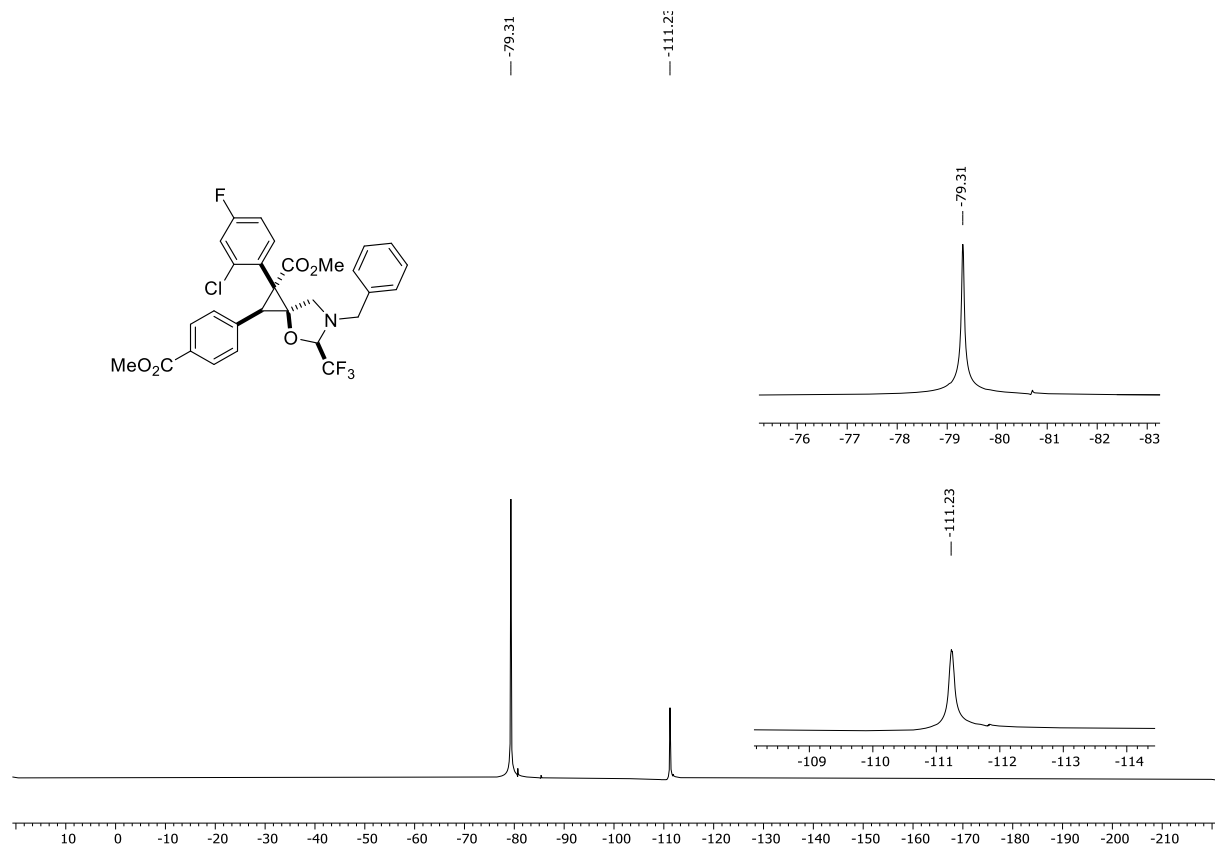

**<sup>1</sup>H NMR Spectrum of 7h (400 MHz, CDCl<sub>3</sub>)**

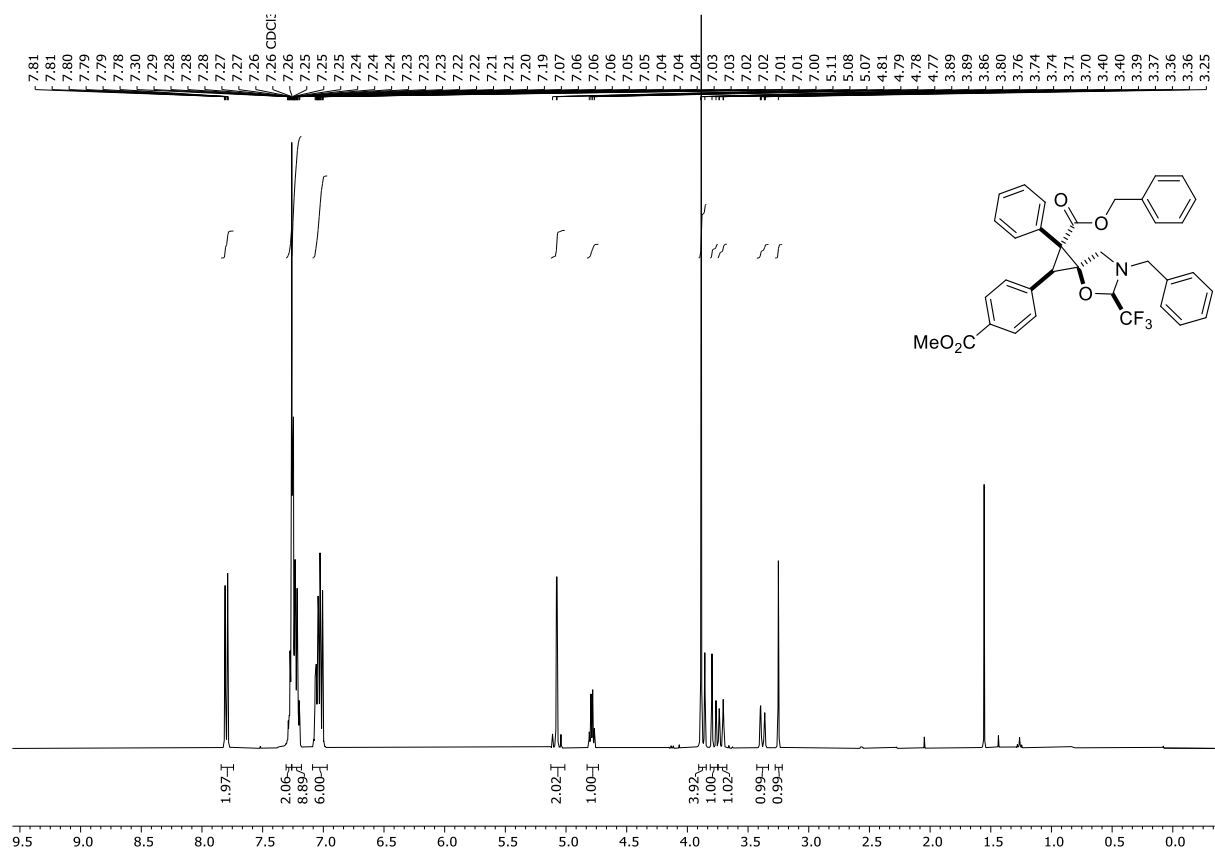

**$^{13}\text{C}$  NMR Spectrum of 7h (101 MHz,  $\text{CDCl}_3$ )**

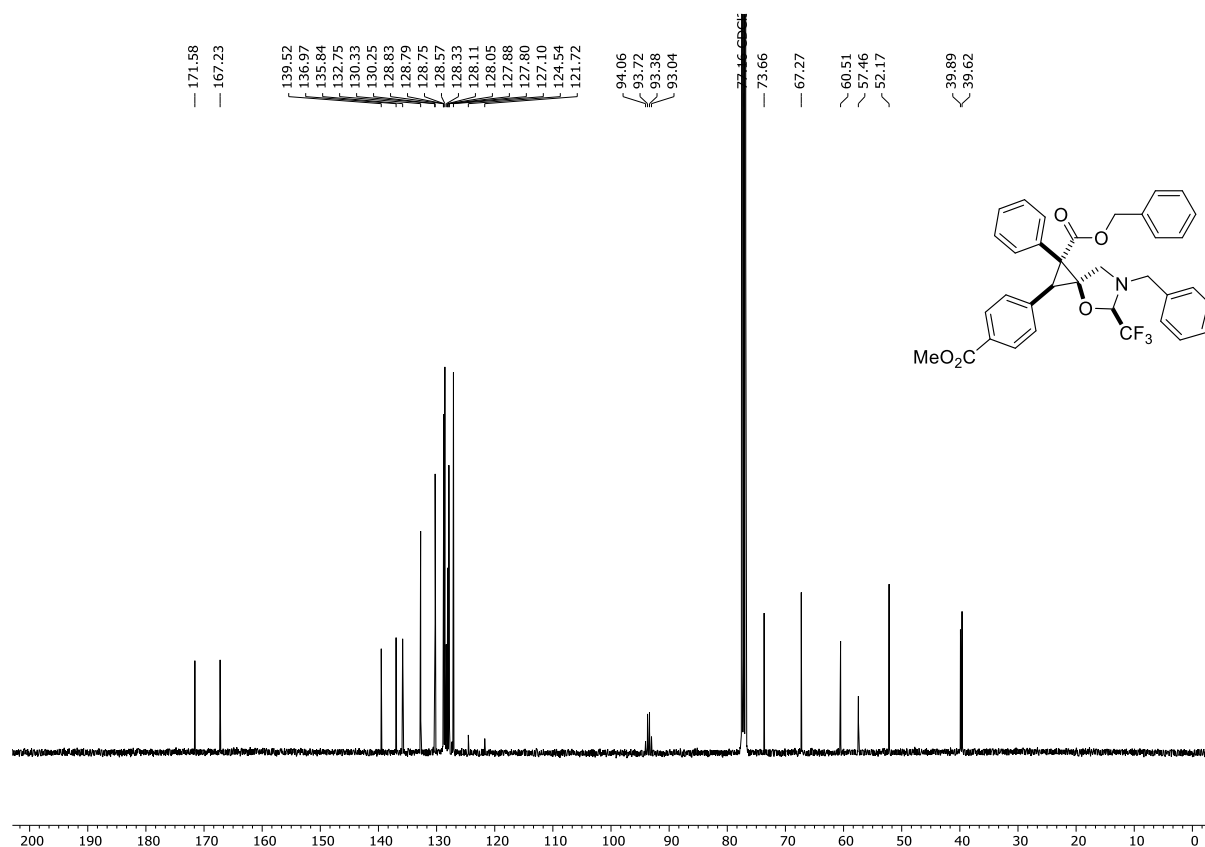

**$^{19}\text{F}$  NMR Spectrum of 7h (376 MHz,  $\text{CDCl}_3$ )**

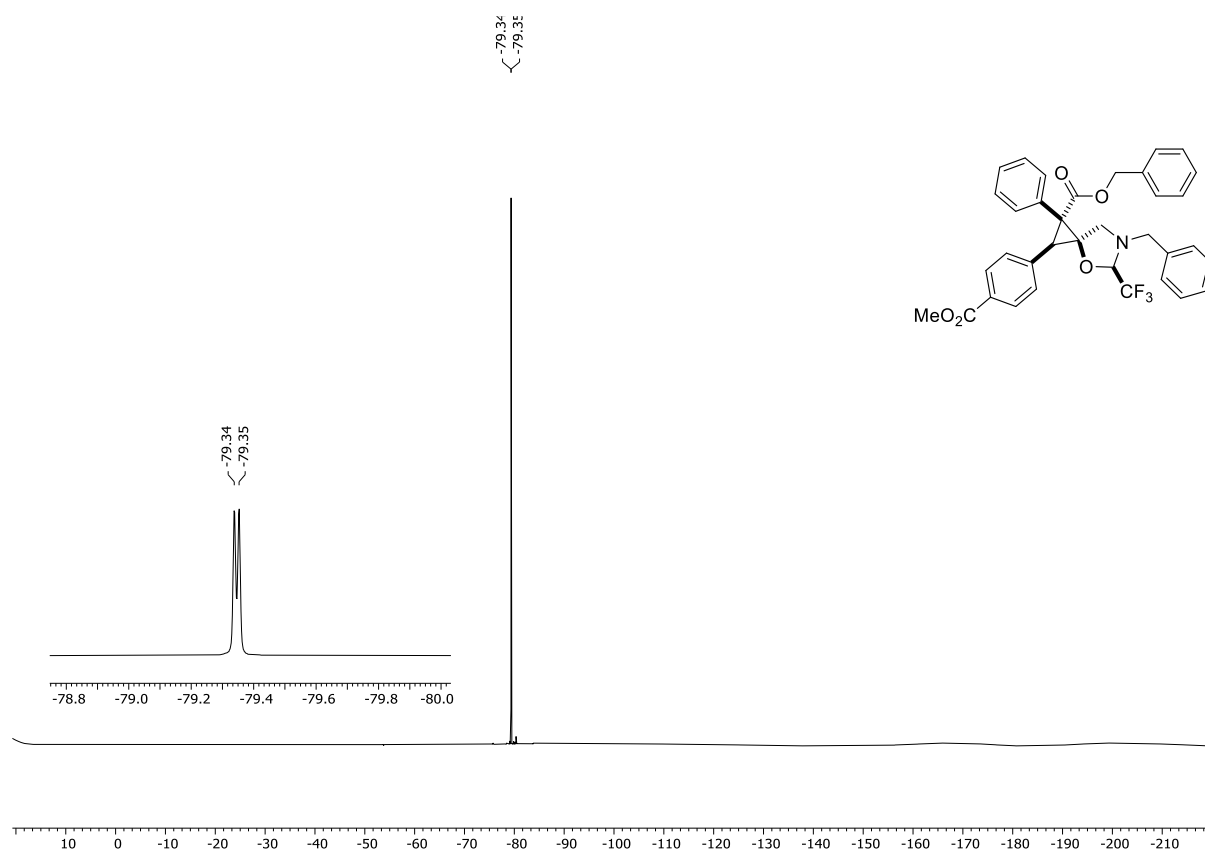

**$^1\text{H}$  NMR Spectrum of 7i (400 MHz,  $\text{CDCl}_3$ )**

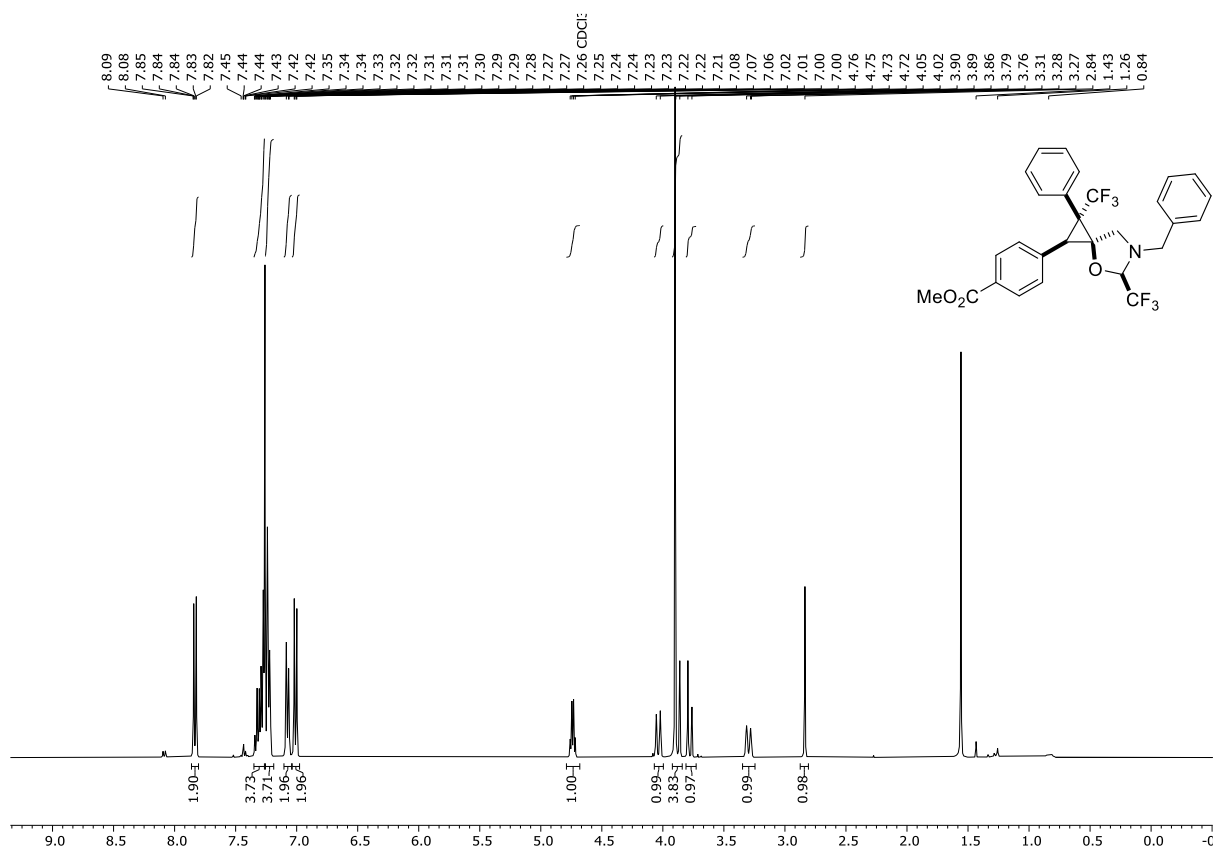

**<sup>13</sup>C NMR Spectrum of 7i (101 MHz, CDCl<sub>3</sub>)**

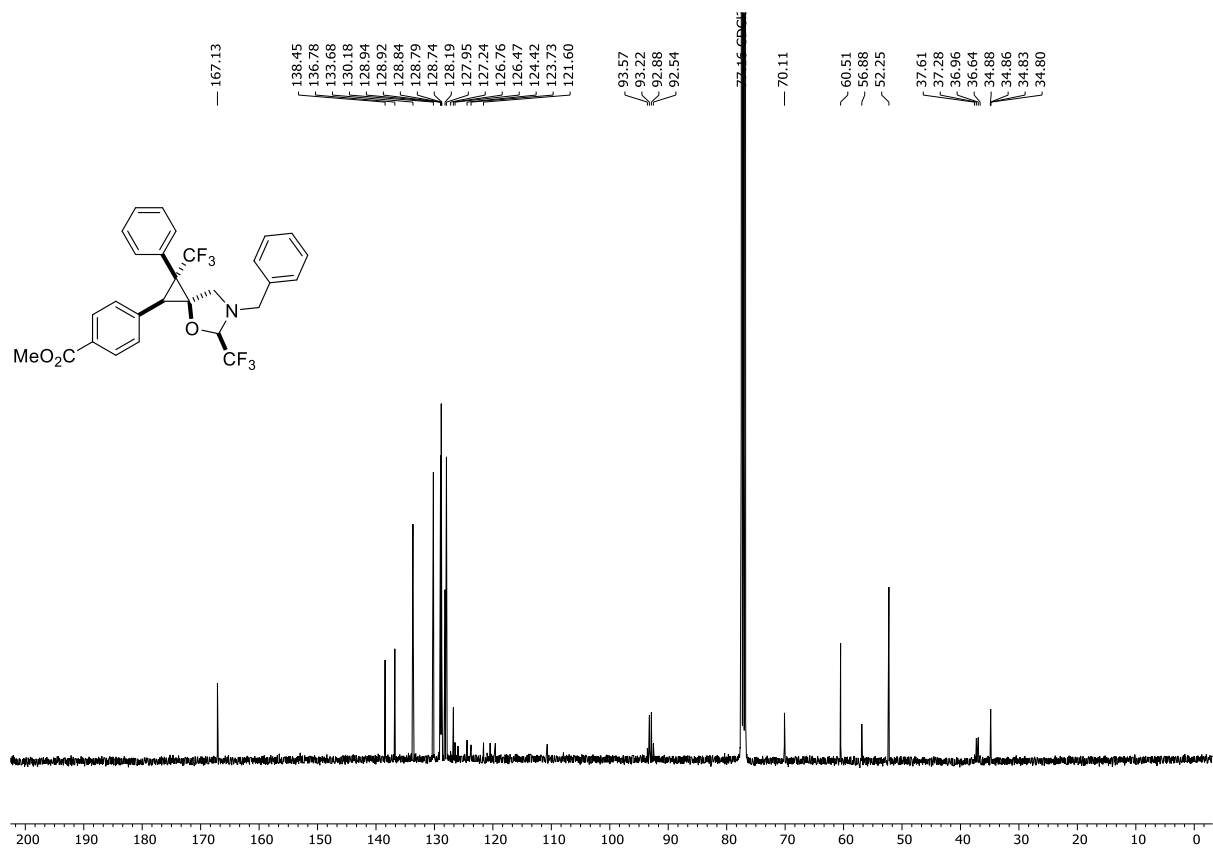

**<sup>19</sup>F NMR Spectrum of 7i (376 MHz, CDCl<sub>3</sub>)**

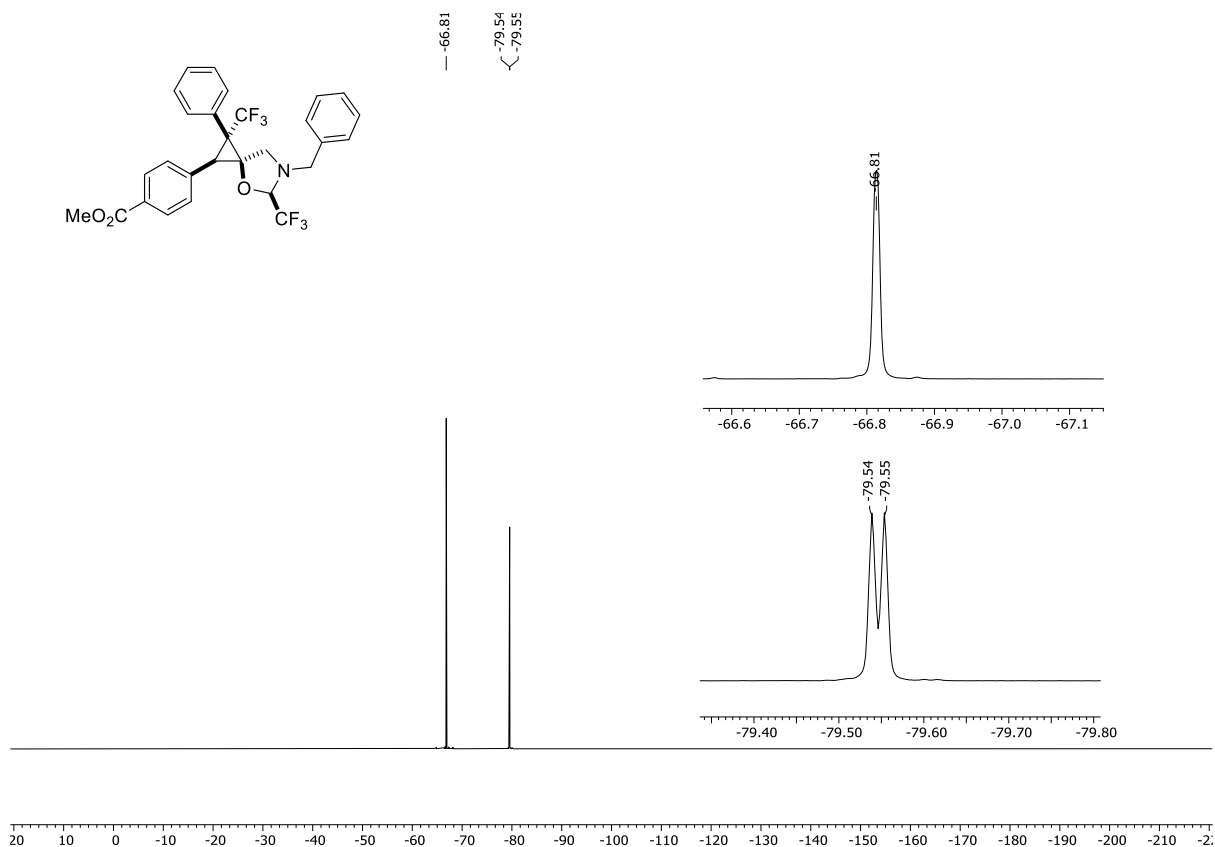

**<sup>1</sup>H NMR Spectrum of 7j (400 MHz, CDCl<sub>3</sub>)**

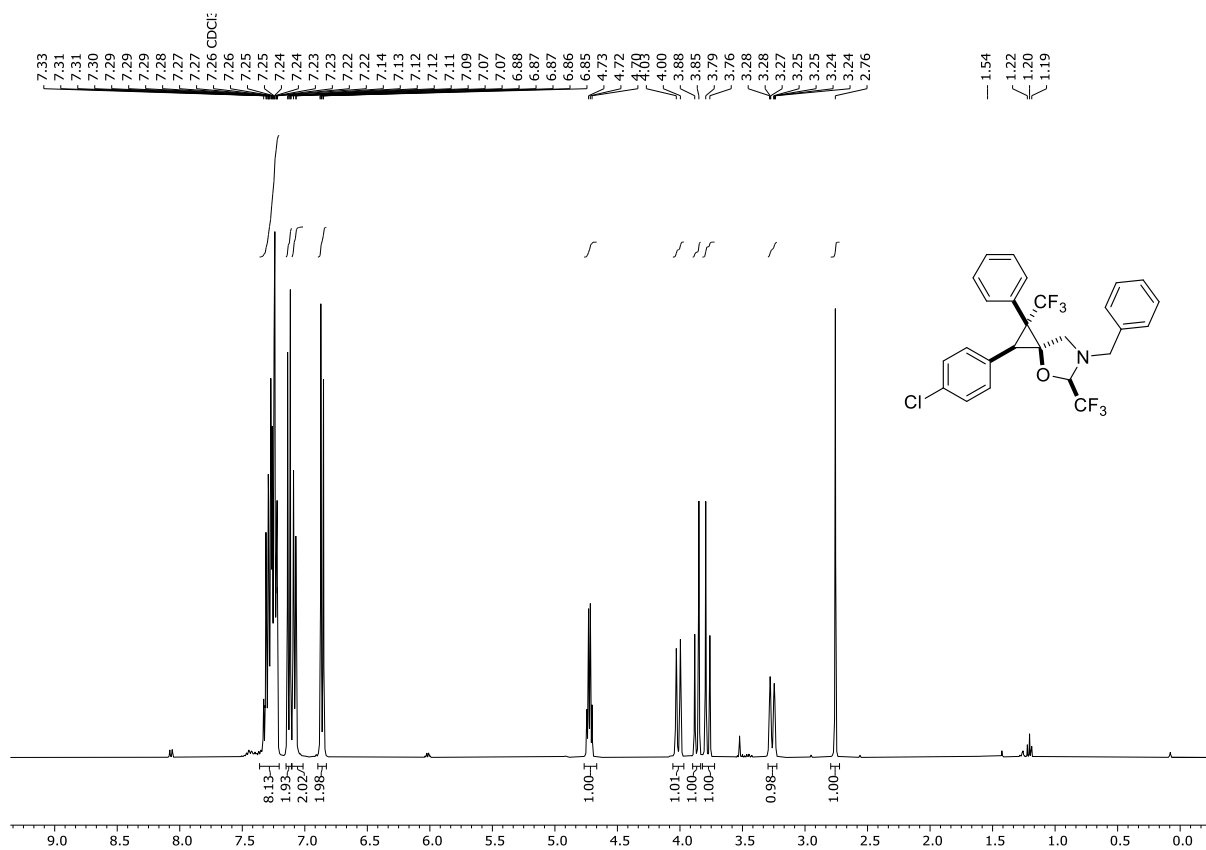

**<sup>13</sup>C NMR Spectrum of 7j (101 MHz, CDCl<sub>3</sub>)**

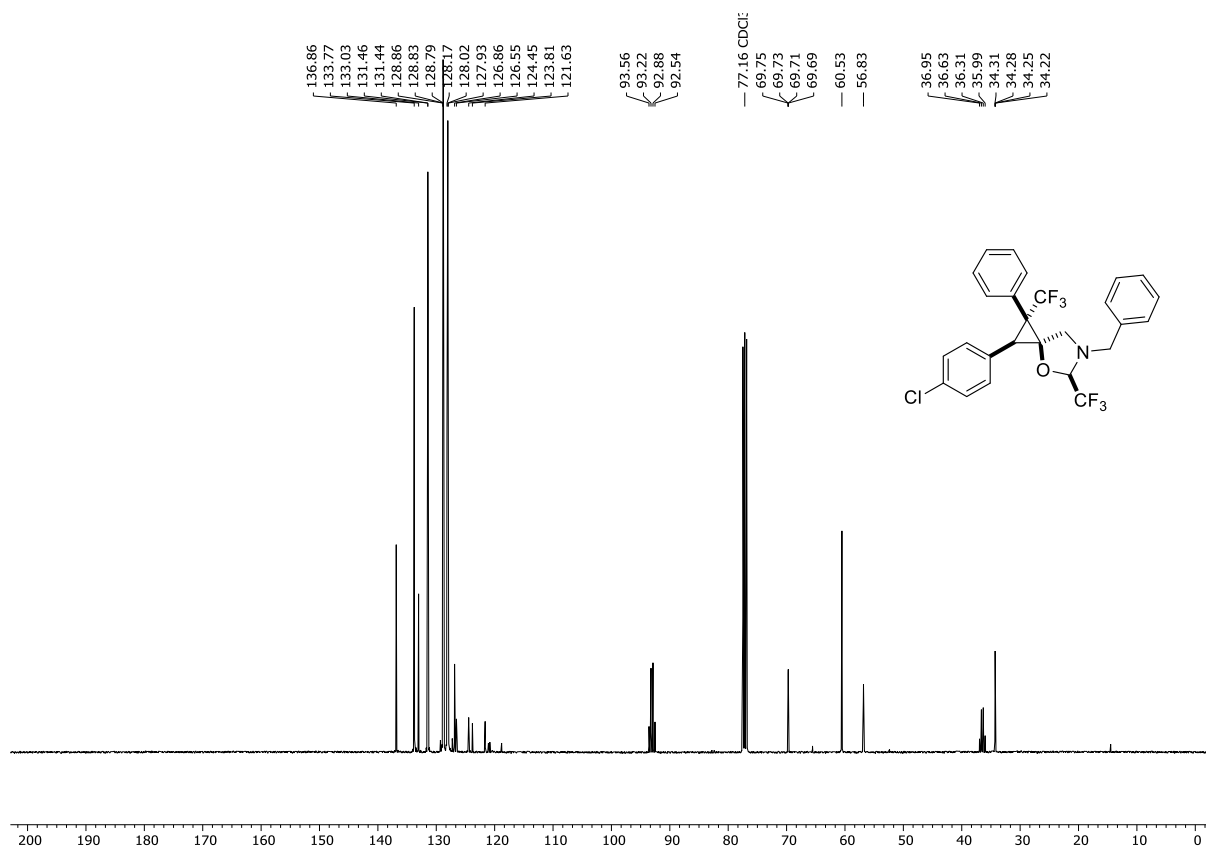

**<sup>19</sup>F NMR Spectrum of 7j (376 MHz, CDCl<sub>3</sub>)**

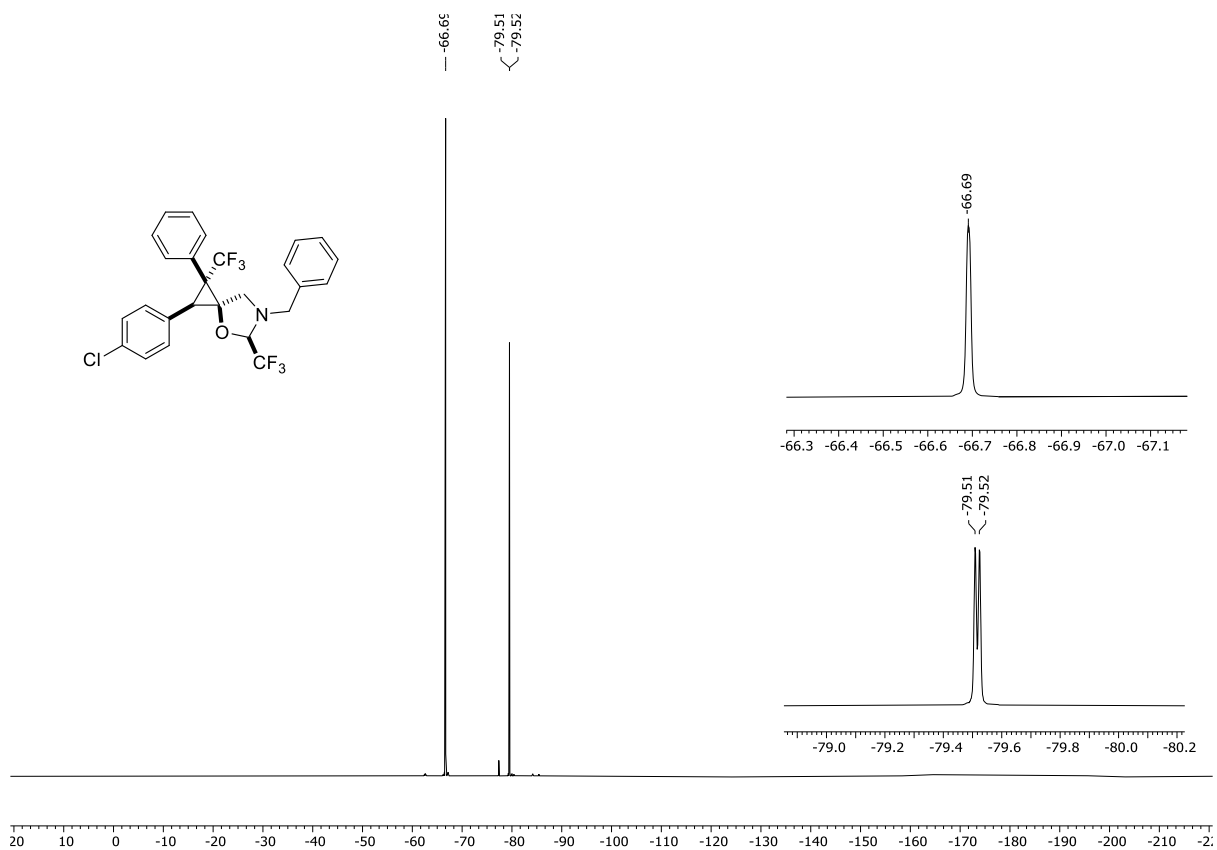

**<sup>1</sup>H NMR Spectrum of 7k (400 MHz, CDCl<sub>3</sub>)**

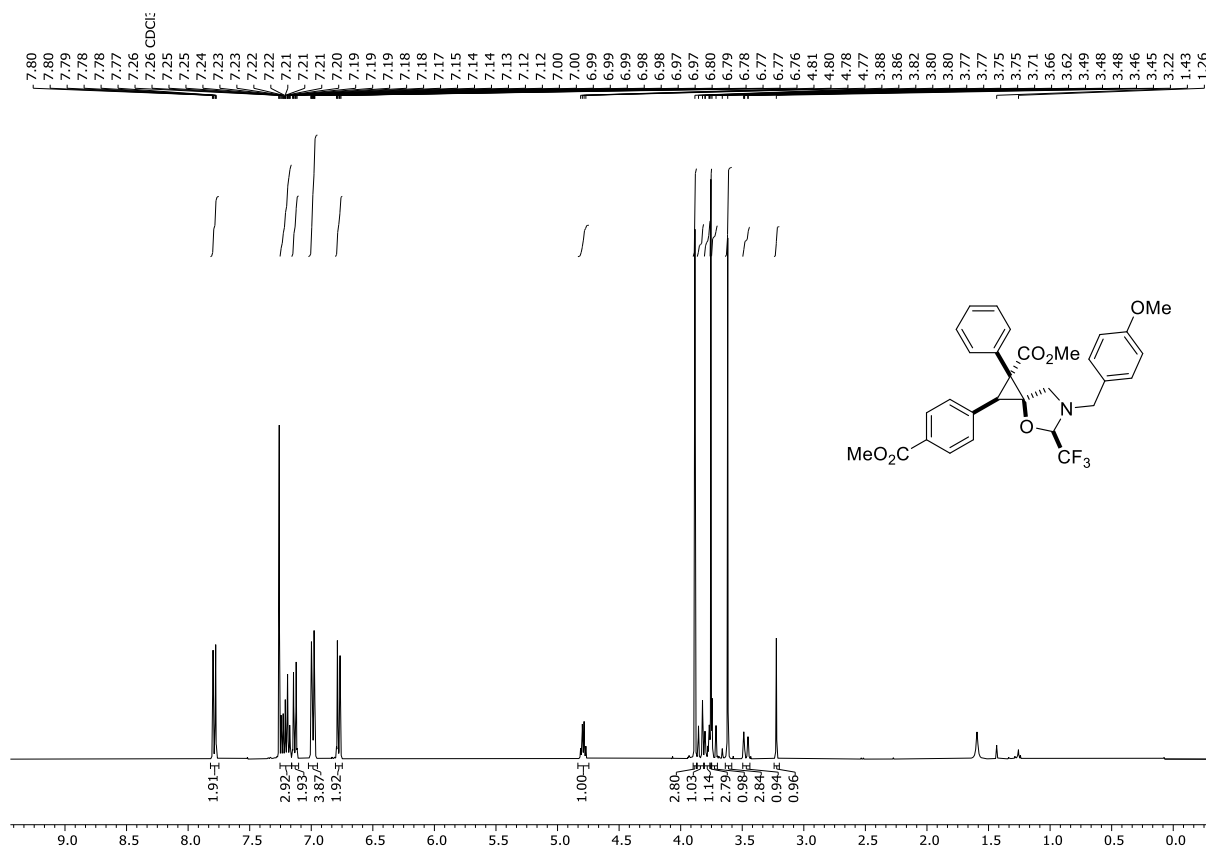

<sup>13</sup>C NMR Spectrum of 7k (101 MHz, CDCl<sub>3</sub>)

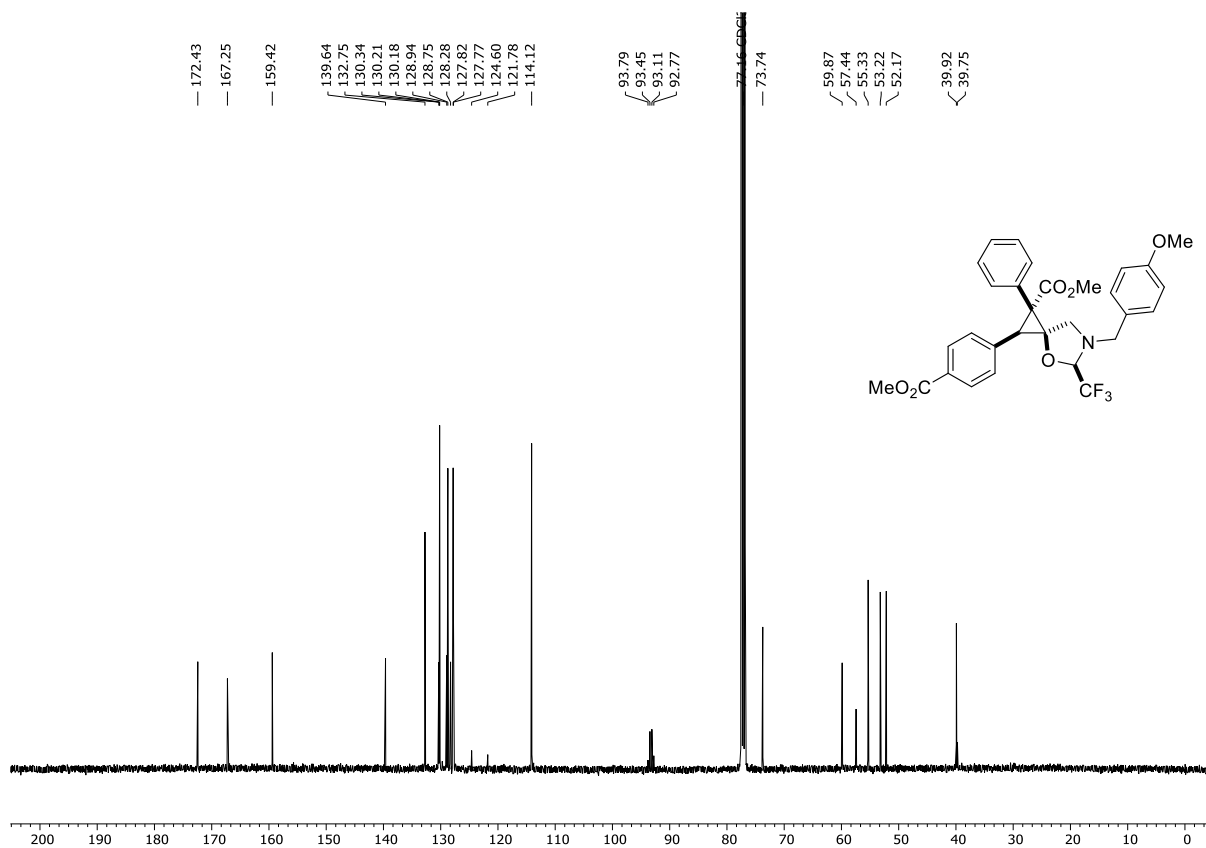

<sup>19</sup>F NMR Spectrum of 7k (376 MHz, CDCl<sub>3</sub>)

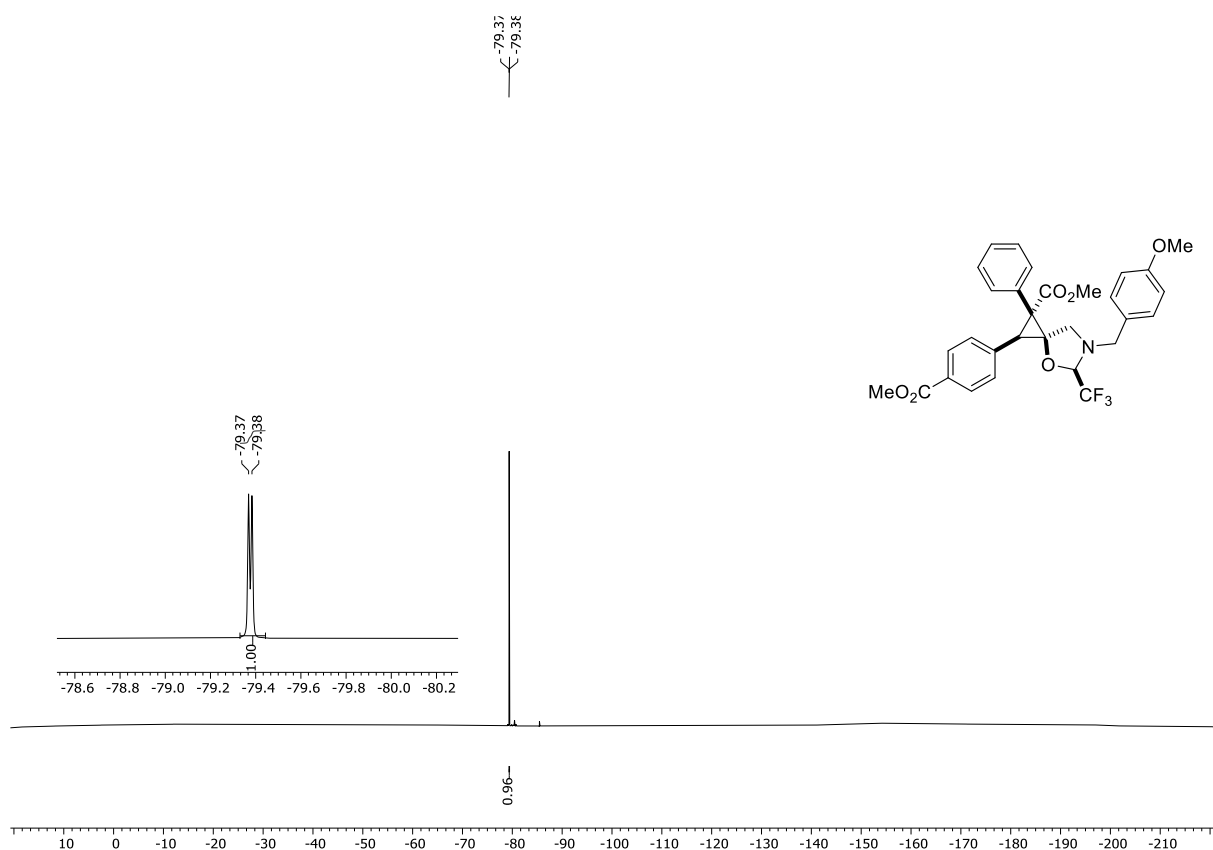

# <sup>1</sup>H NMR Spectrum of 7I (400 MHz, CDCl<sub>3</sub>)

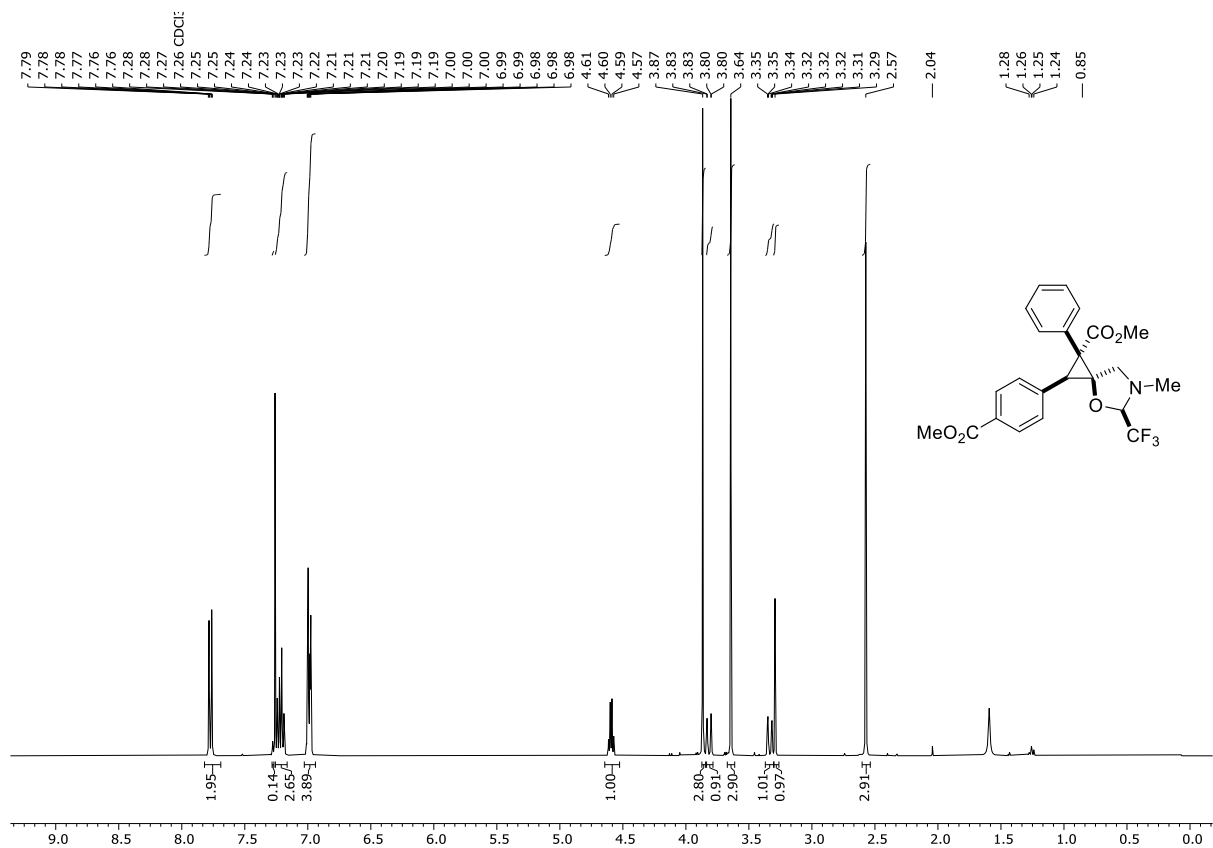

# <sup>13</sup>C NMR Spectrum of 7I (101 MHz, CDCl<sub>3</sub>)

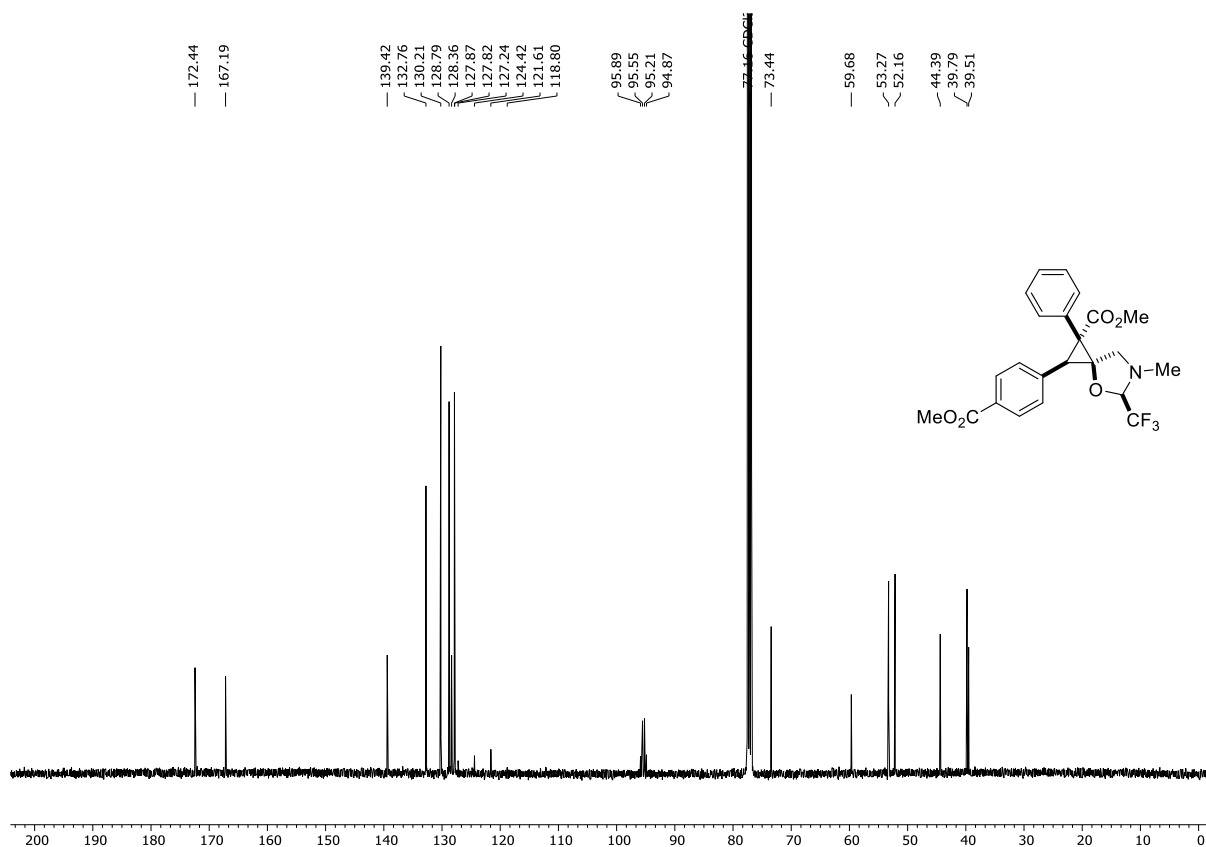

**<sup>19</sup>F NMR Spectrum of 7l (376 MHz, CDCl<sub>3</sub>)**

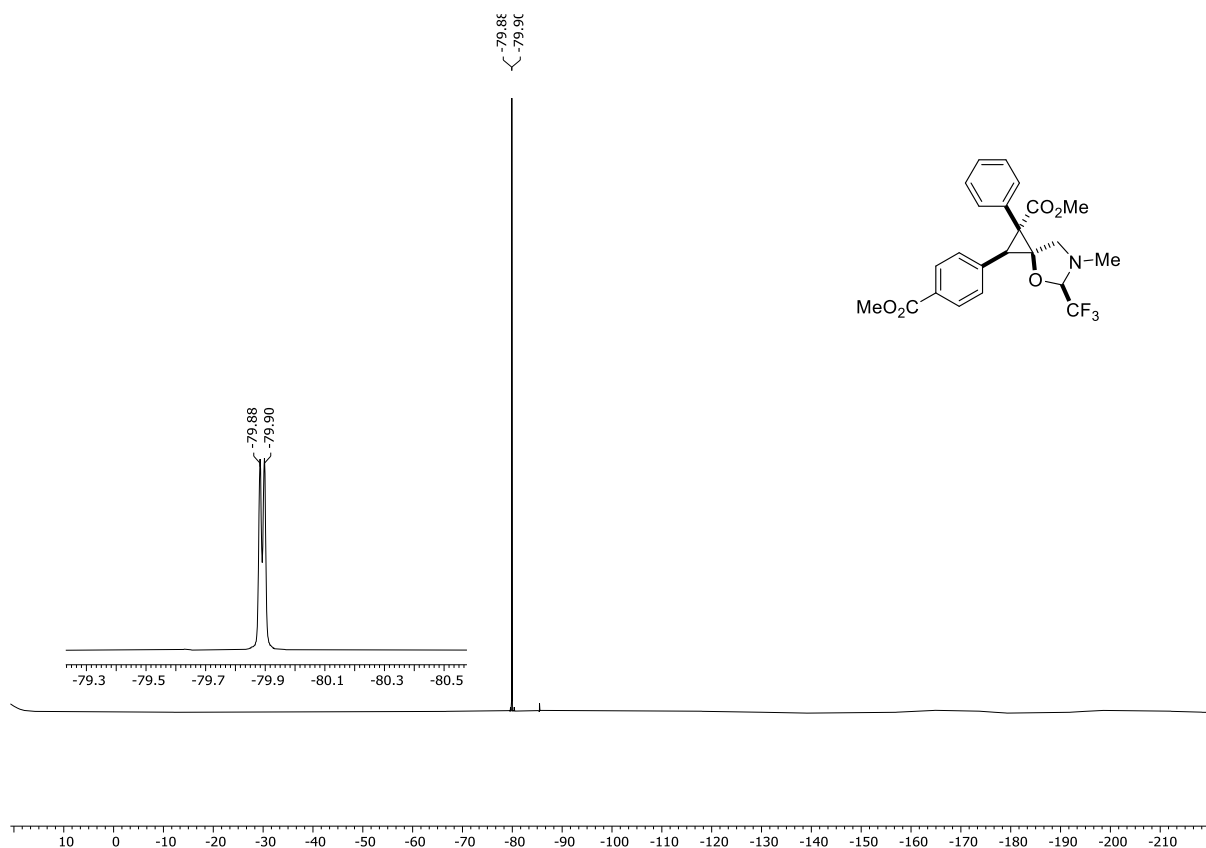

**<sup>1</sup>H NMR Spectrum of 7m (400 MHz, CDCl<sub>3</sub>)**



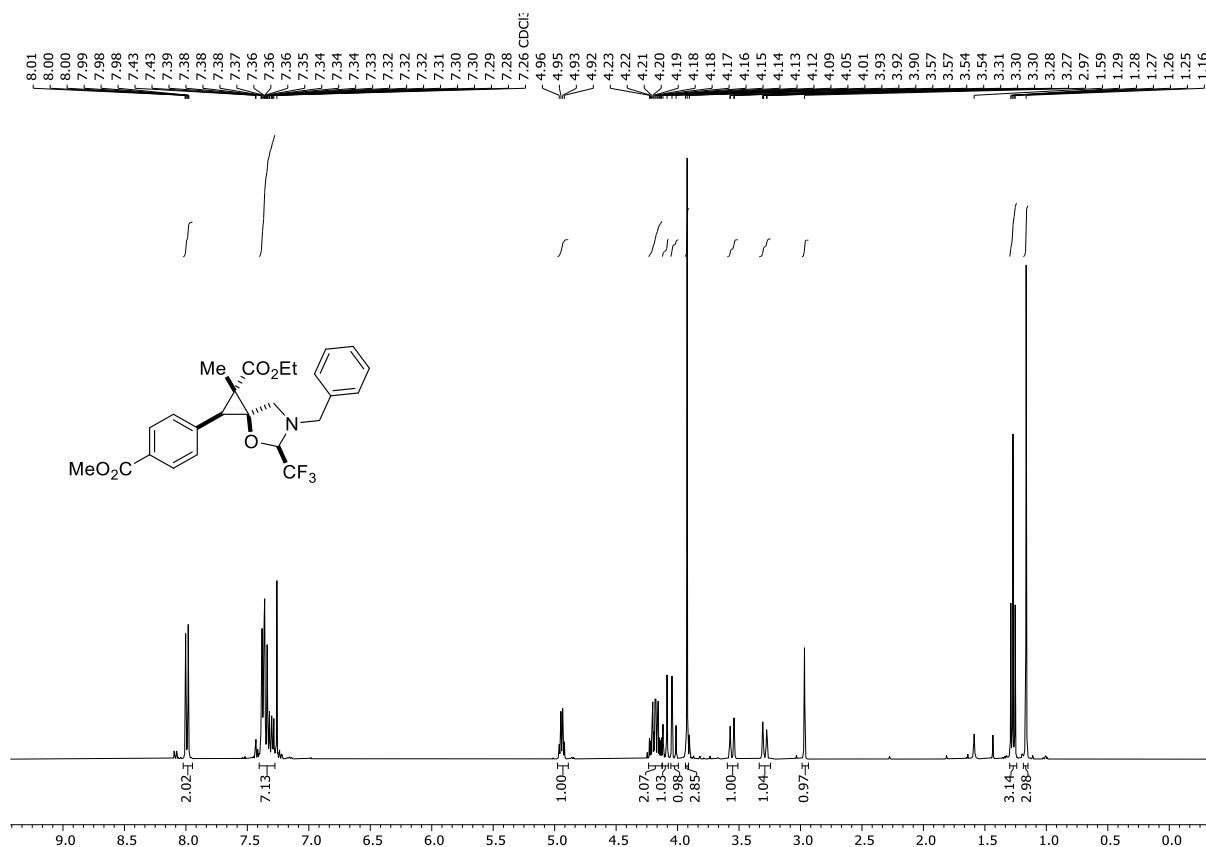

**<sup>13</sup>C NMR Spectrum of 7m (101 MHz, CDCl<sub>3</sub>)**

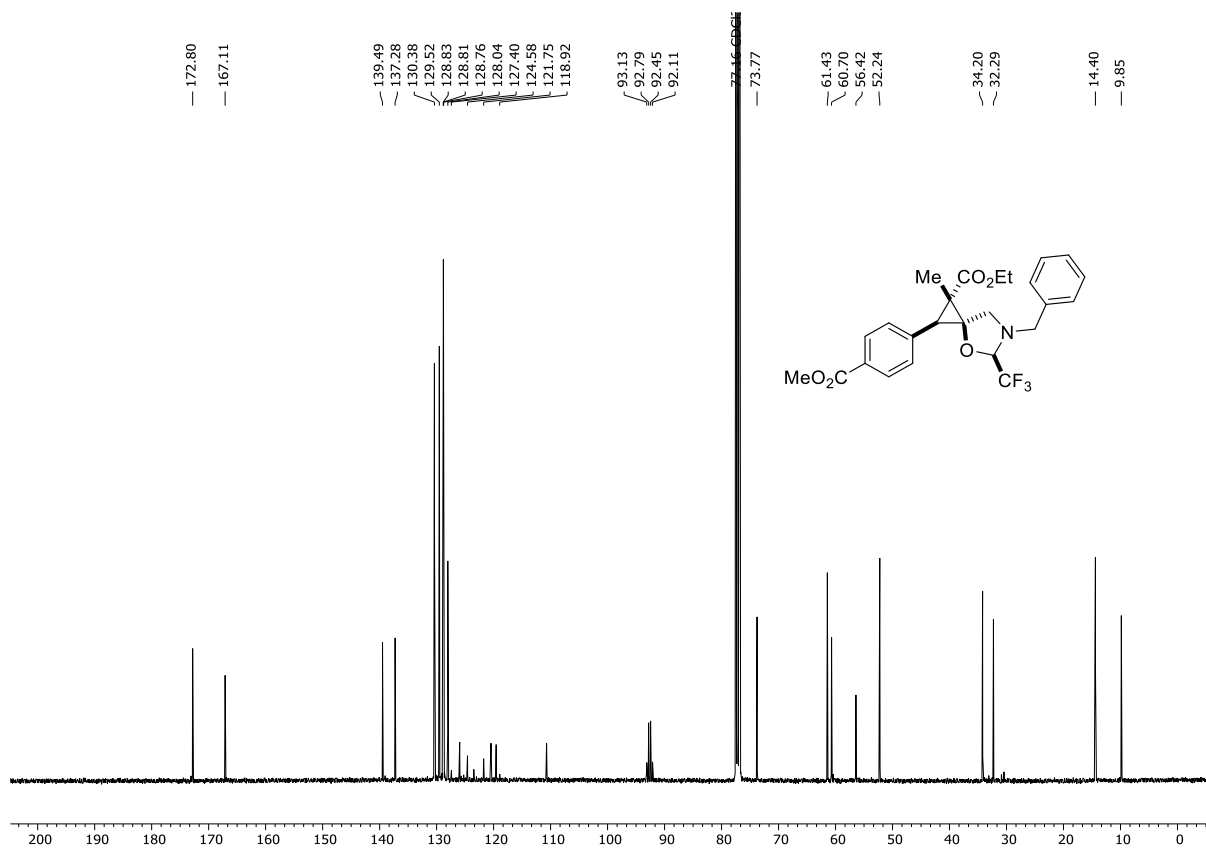

**<sup>19</sup>F NMR Spectrum of 7m (376 MHz, CDCl<sub>3</sub>)**

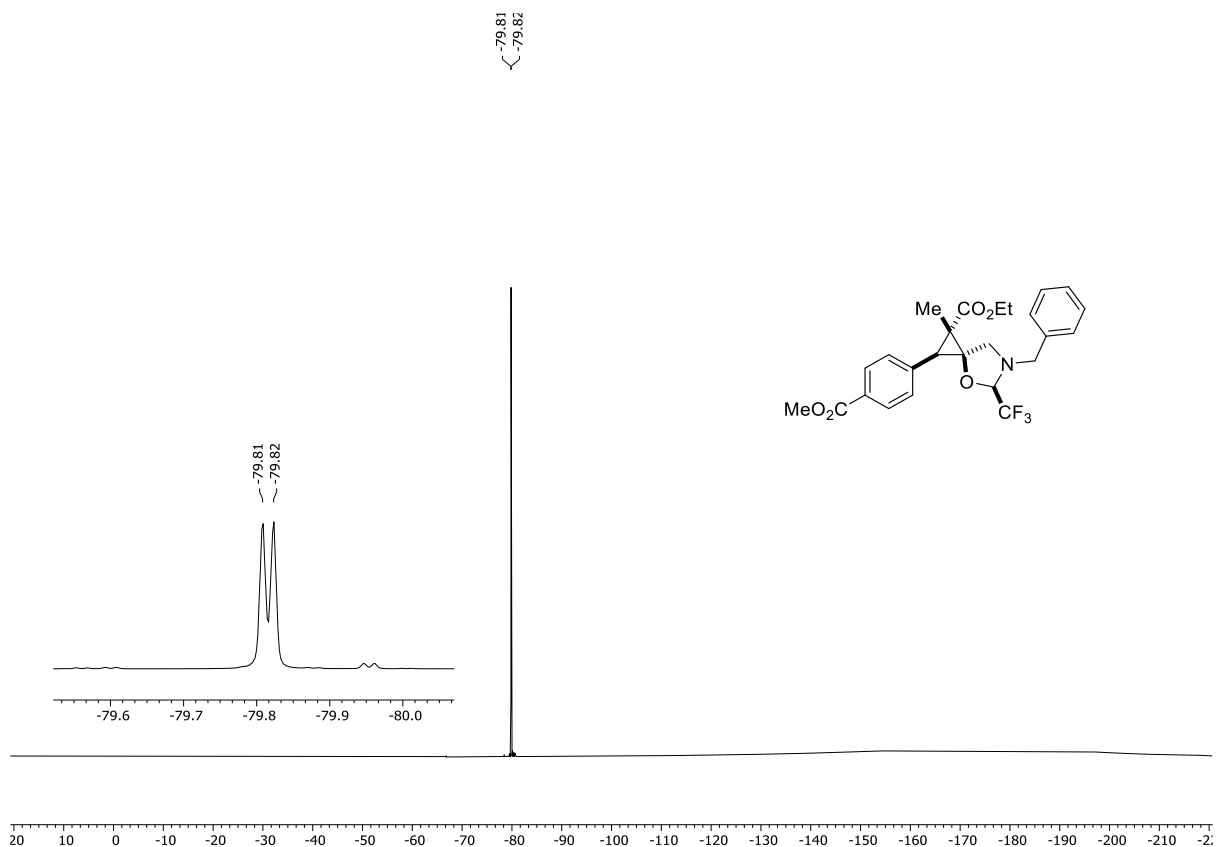

$^1\text{H}$  NMR Spectrum of 7n (400 MHz,  $\text{CDCl}_3$ )

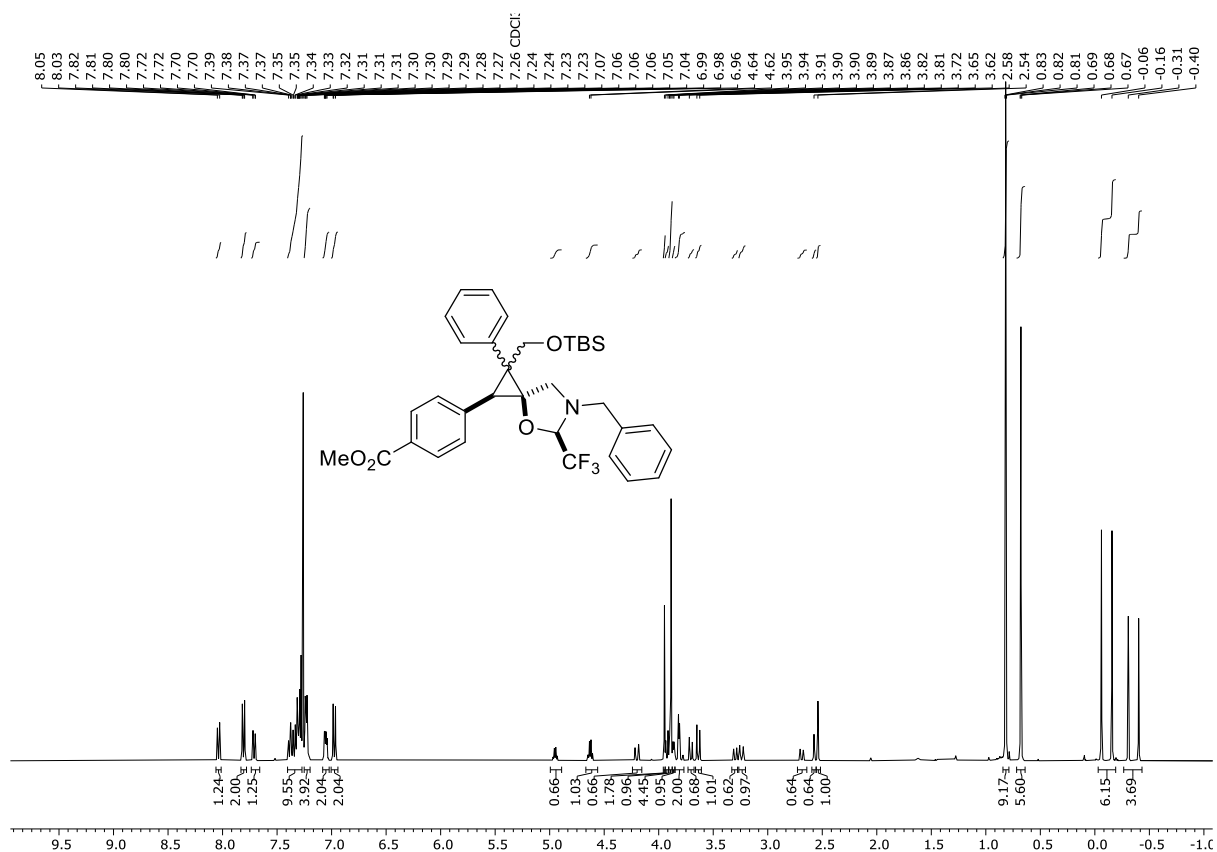

$^{13}\text{C}$  NMR Spectrum of 7n (101 MHz,  $\text{CDCl}_3$ )

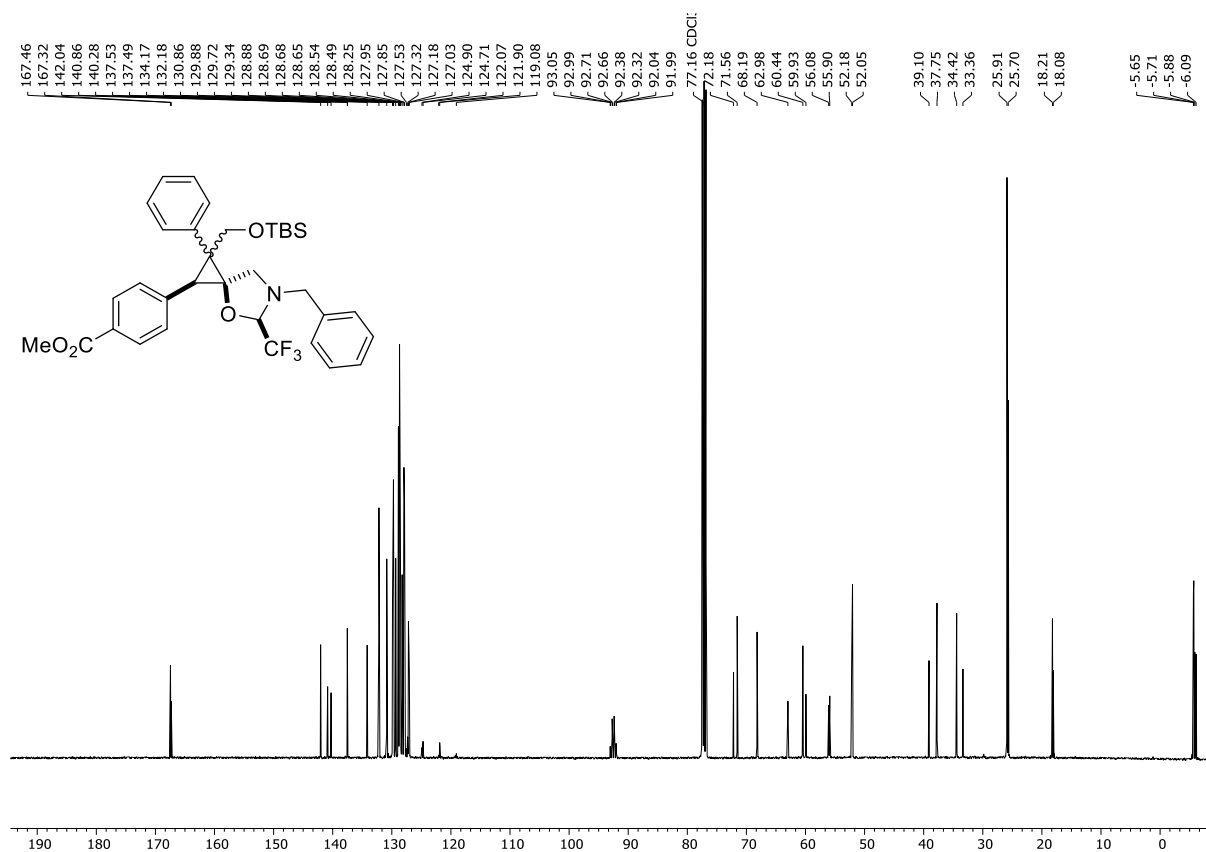

**<sup>19</sup>F NMR Spectrum of 7n (376 MHz, CDCl<sub>3</sub>)**

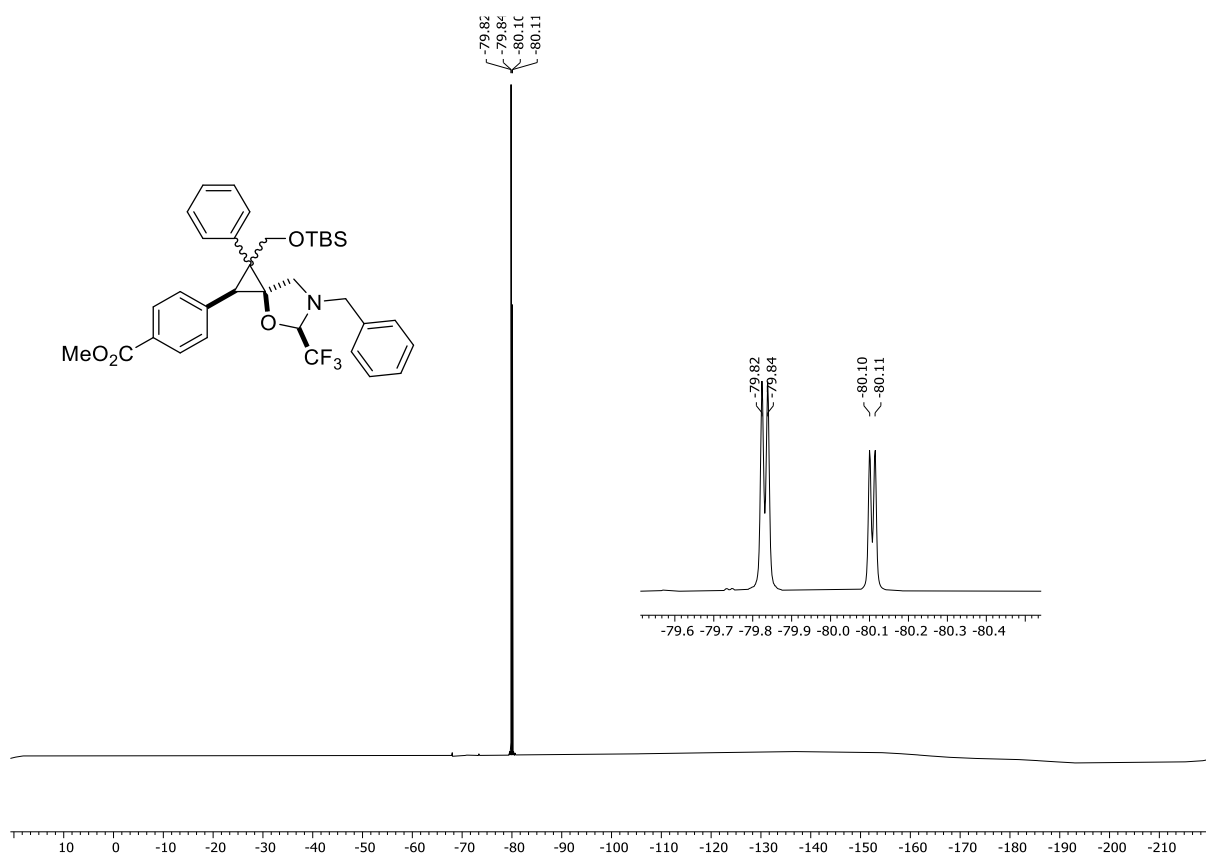

**<sup>1</sup>H NMR Spectrum of 9a (400 MHz, CDCl<sub>3</sub>)**

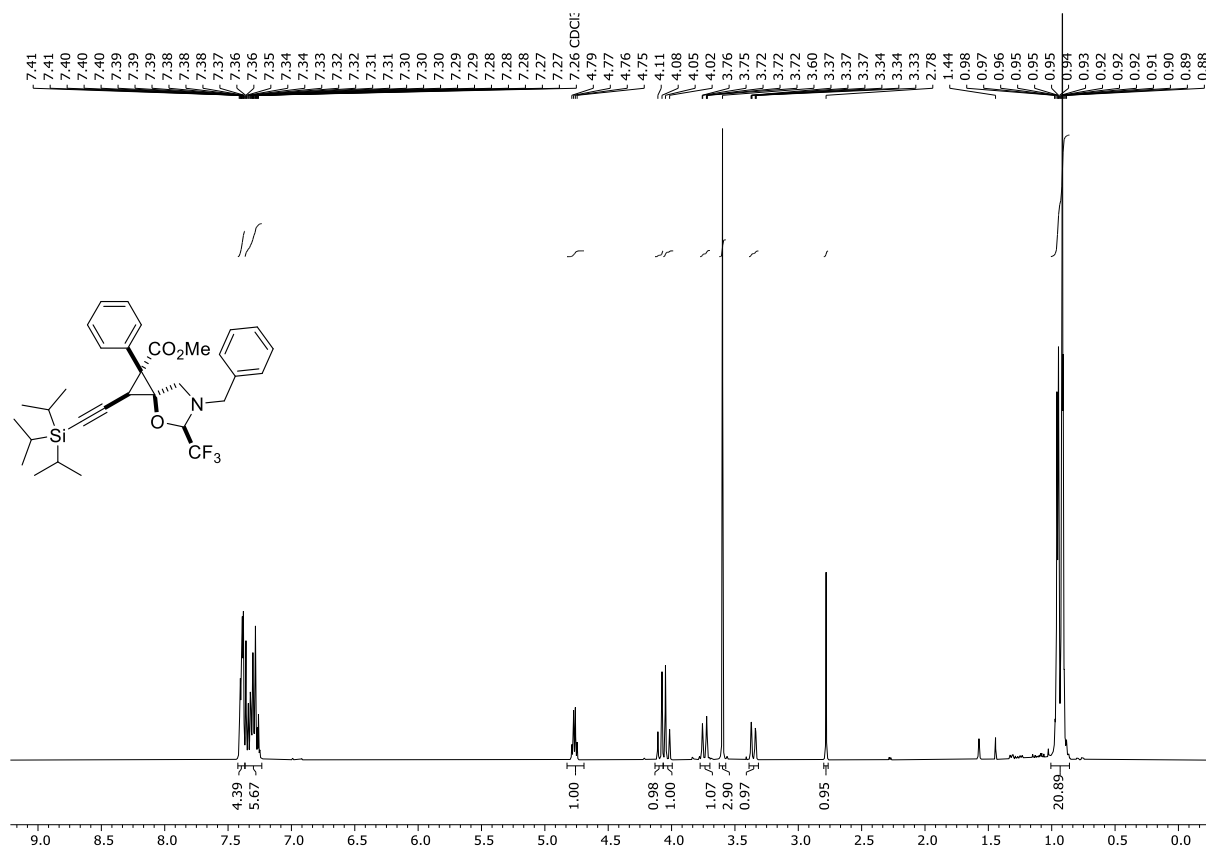

<sup>13</sup>C NMR Spectrum of 9a (101 MHz, CDCl<sub>3</sub>)

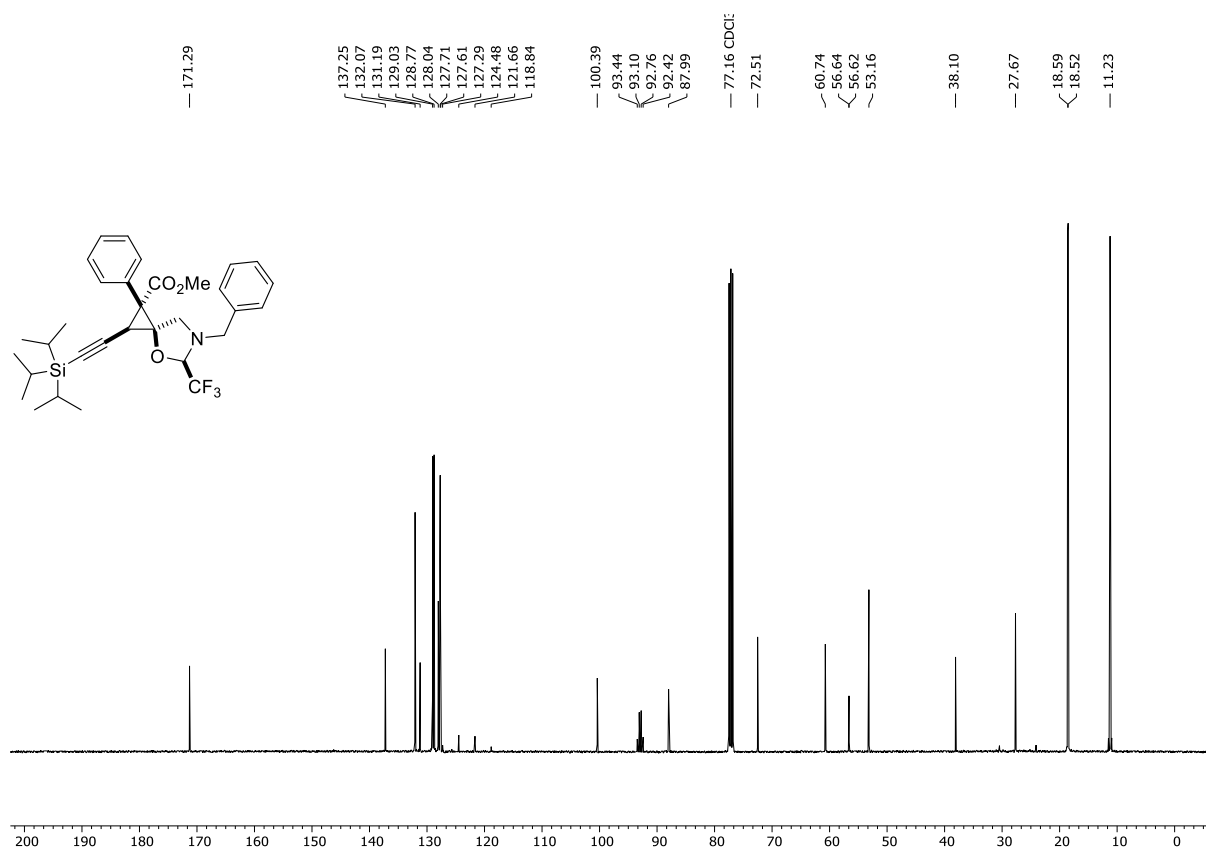

-79.7€

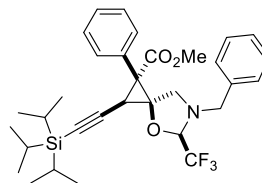 $\frac{v}{c}$ 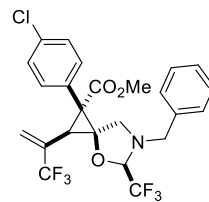

**$^{13}\text{C}$  NMR Spectrum of 11a (101 MHz,  $\text{CDCl}_3$ )**

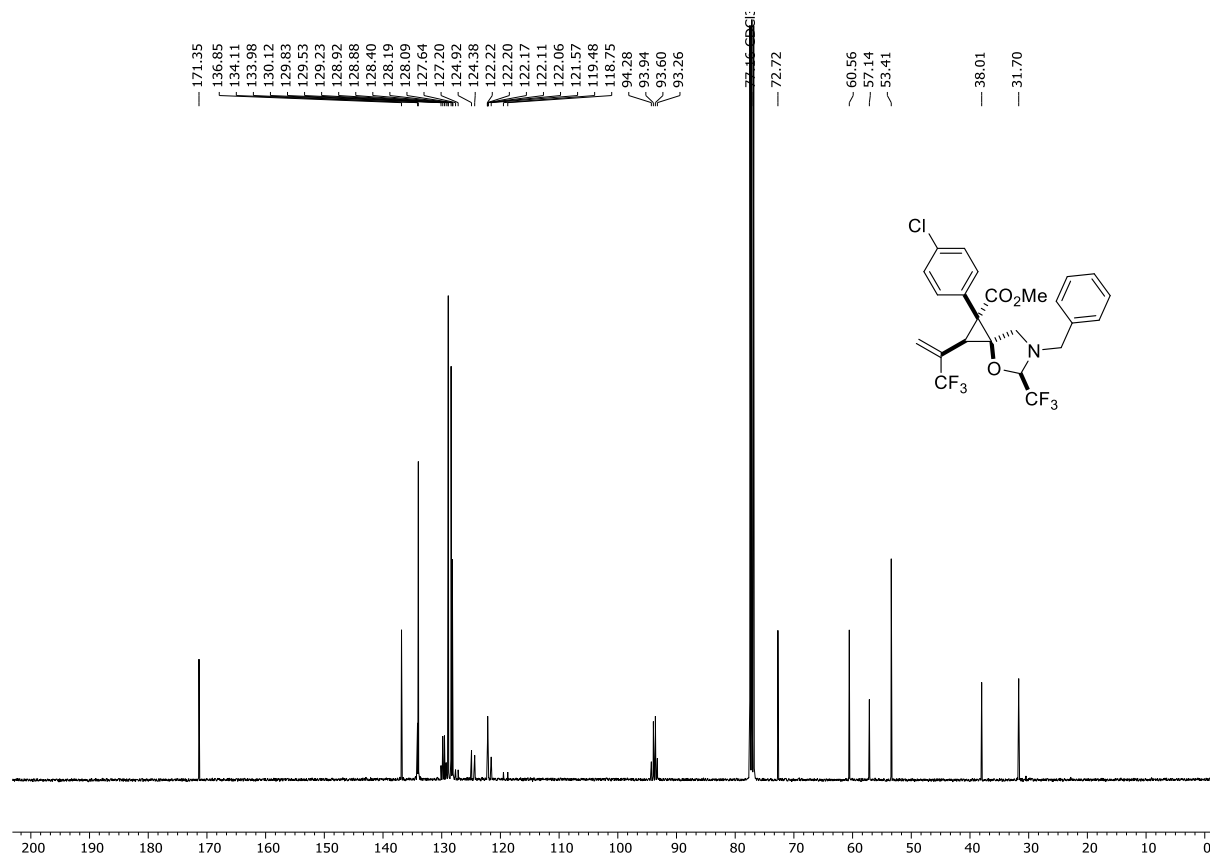

**$^{19}\text{F}$  NMR Spectrum of 11a (376 MHz,  $\text{CDCl}_3$ )**

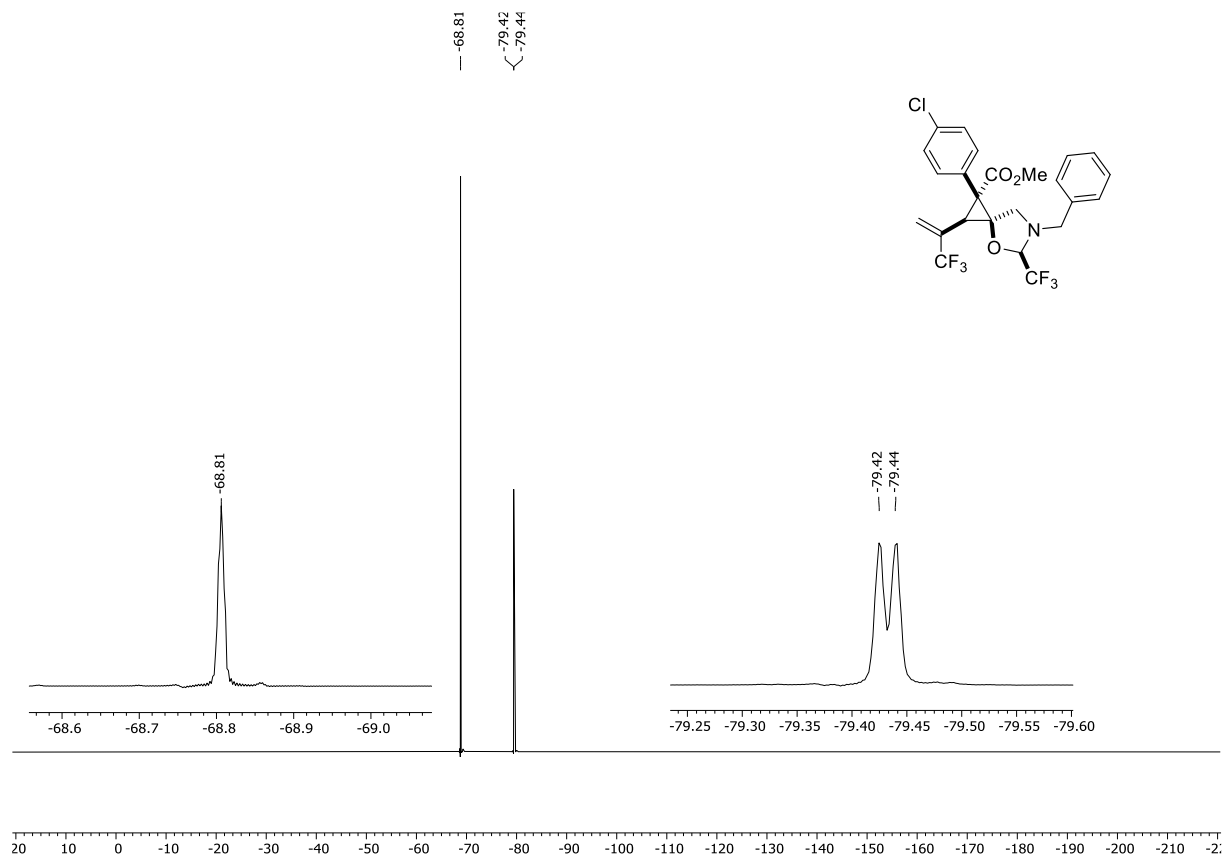

**<sup>1</sup>H NMR Spectrum of 11b (400 MHz, CDCl<sub>3</sub>)**

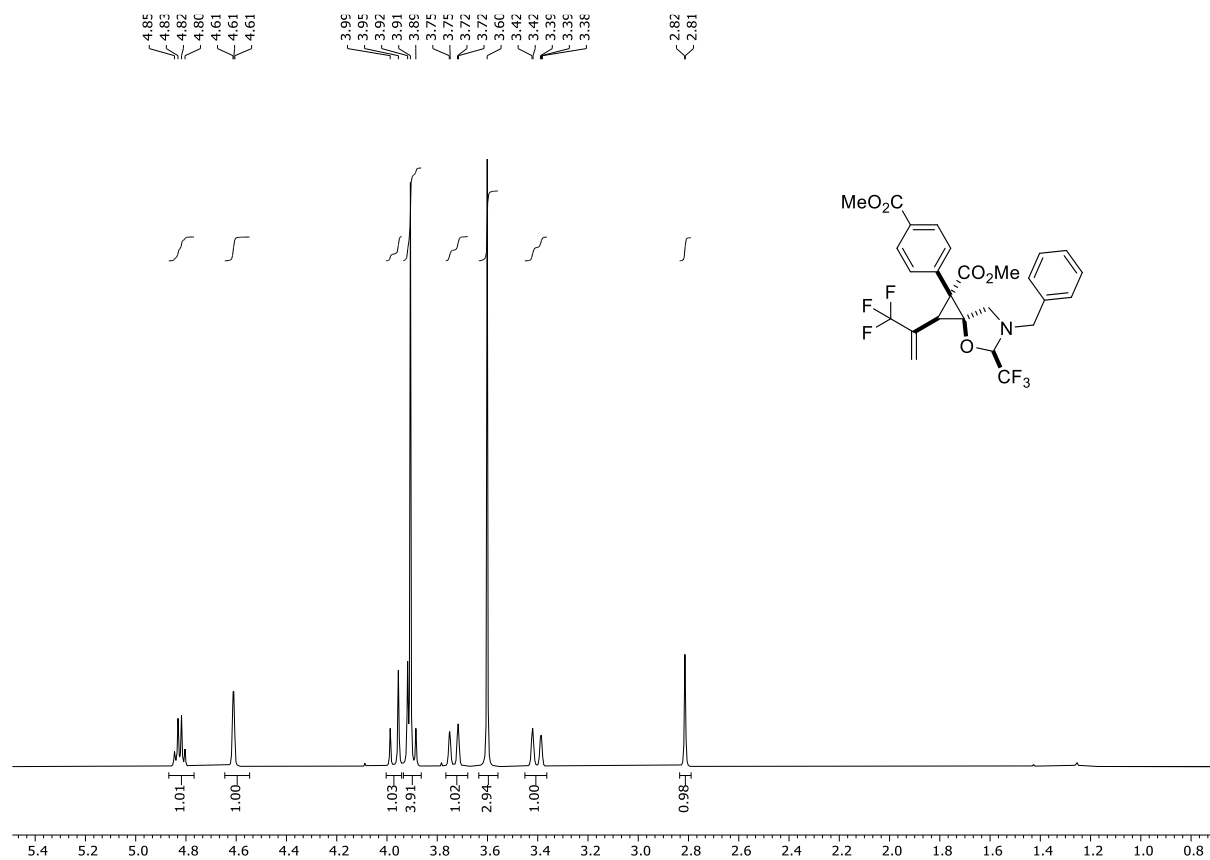

**<sup>13</sup>C NMR Spectrum of 11b (101 MHz, CDCl<sub>3</sub>)**

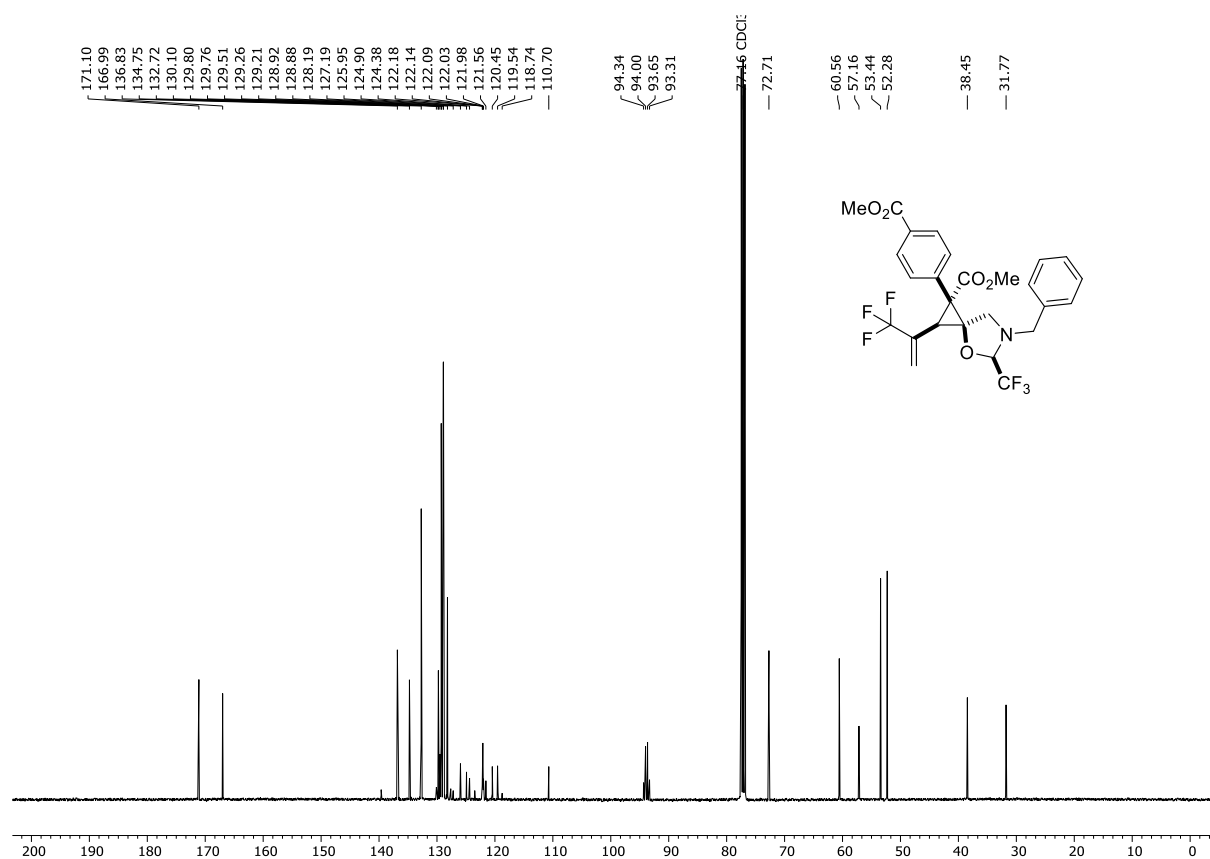

**$^{19}\text{F}$  NMR Spectrum of 11b (376 MHz,  $\text{CDCl}_3$ )**

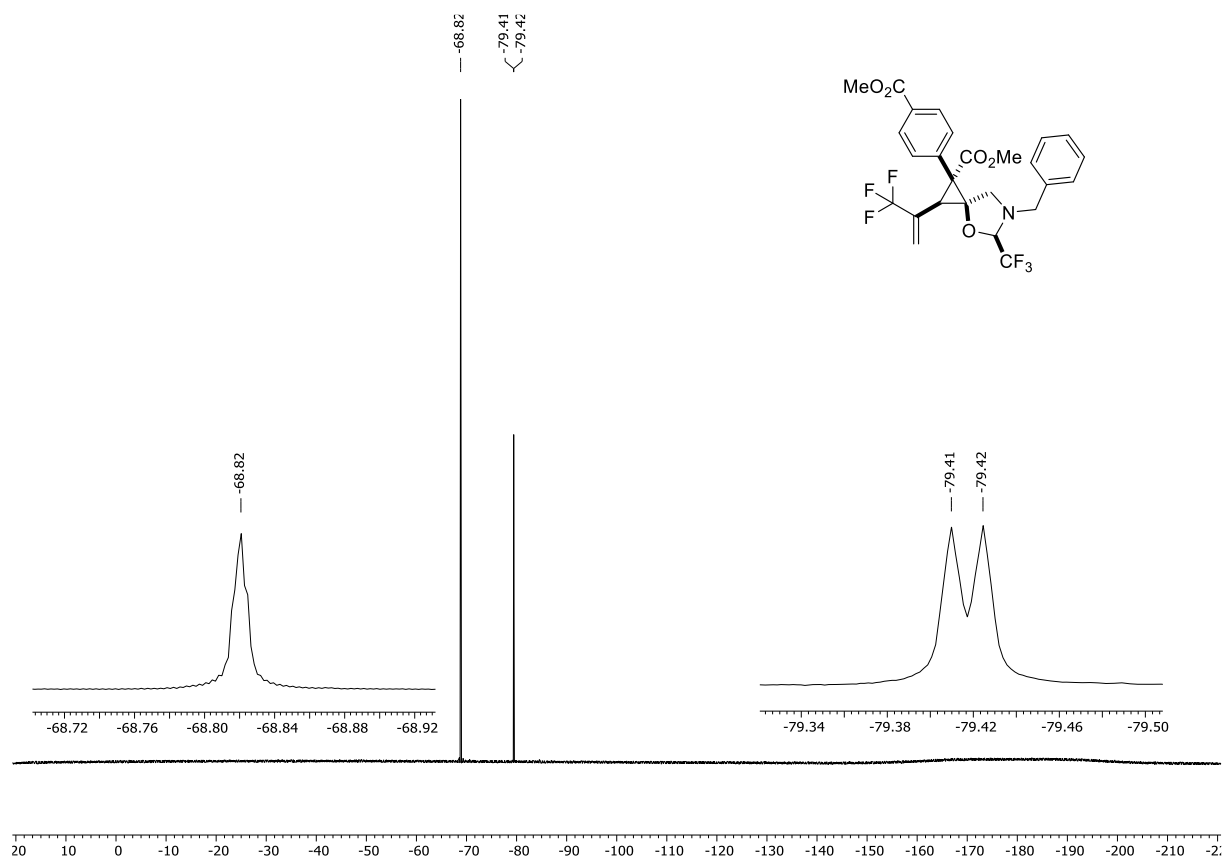

**Product Modifications**

**$^1\text{H}$  NMR Spectrum of 12 (400 MHz,  $\text{CDCl}_3$ )**



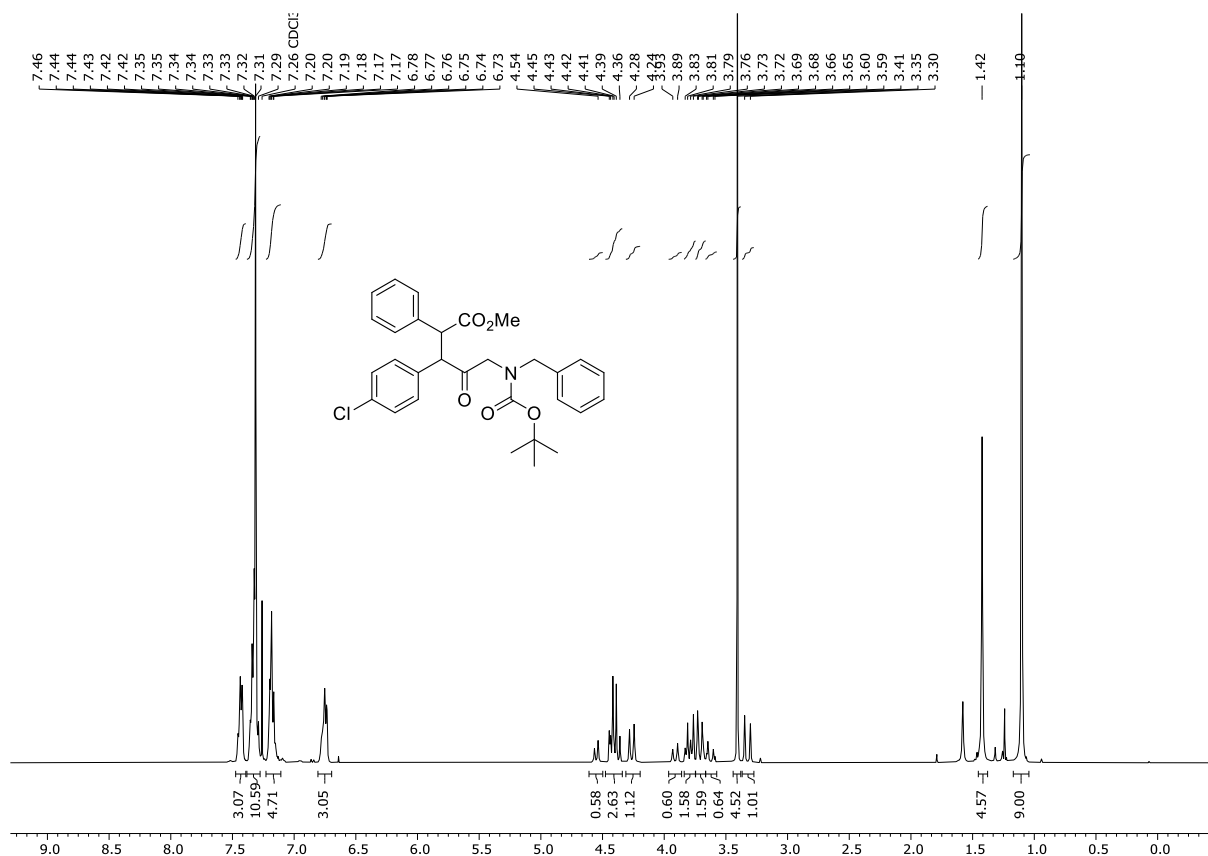

**<sup>13</sup>C NMR Spectrum of 12 (101 MHz, CDCl<sub>3</sub>)**

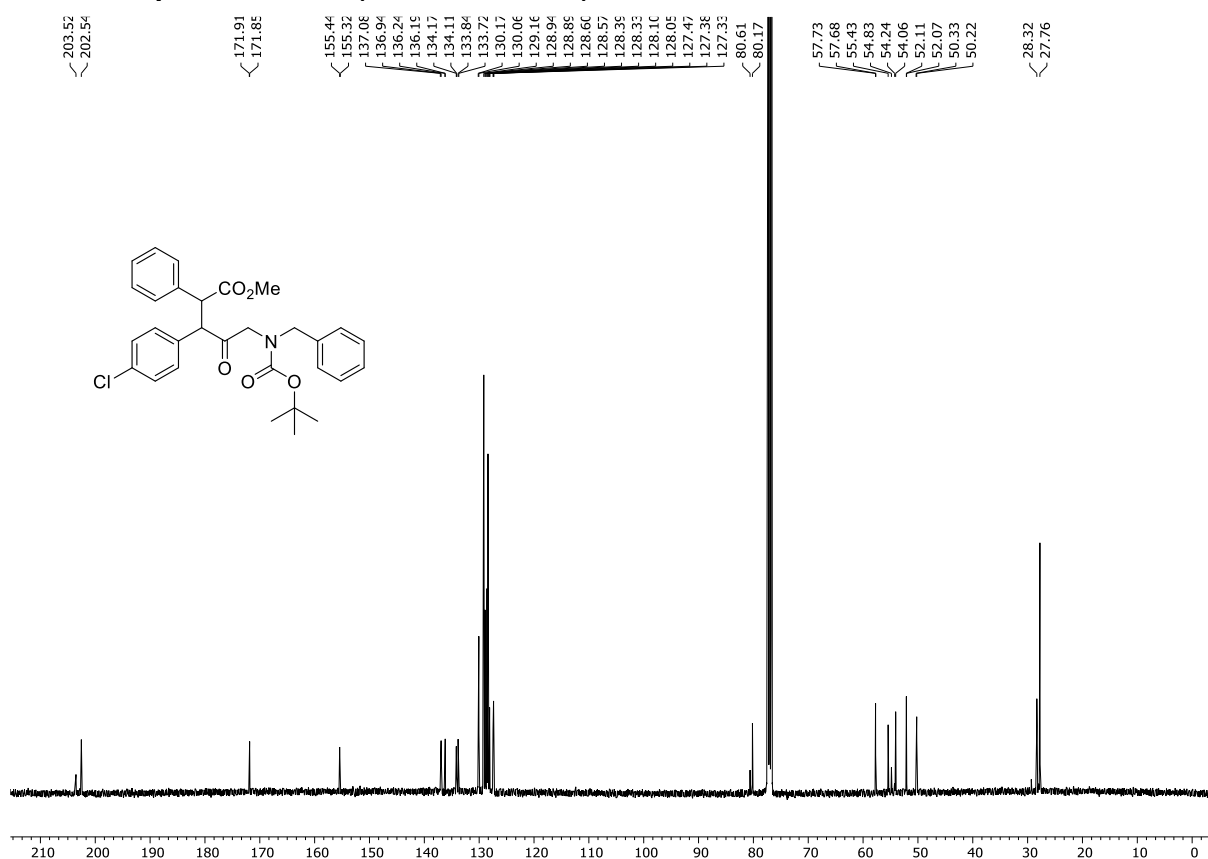

**<sup>1</sup>H NMR Spectrum of 13 (400 MHz, CDCl<sub>3</sub>)**

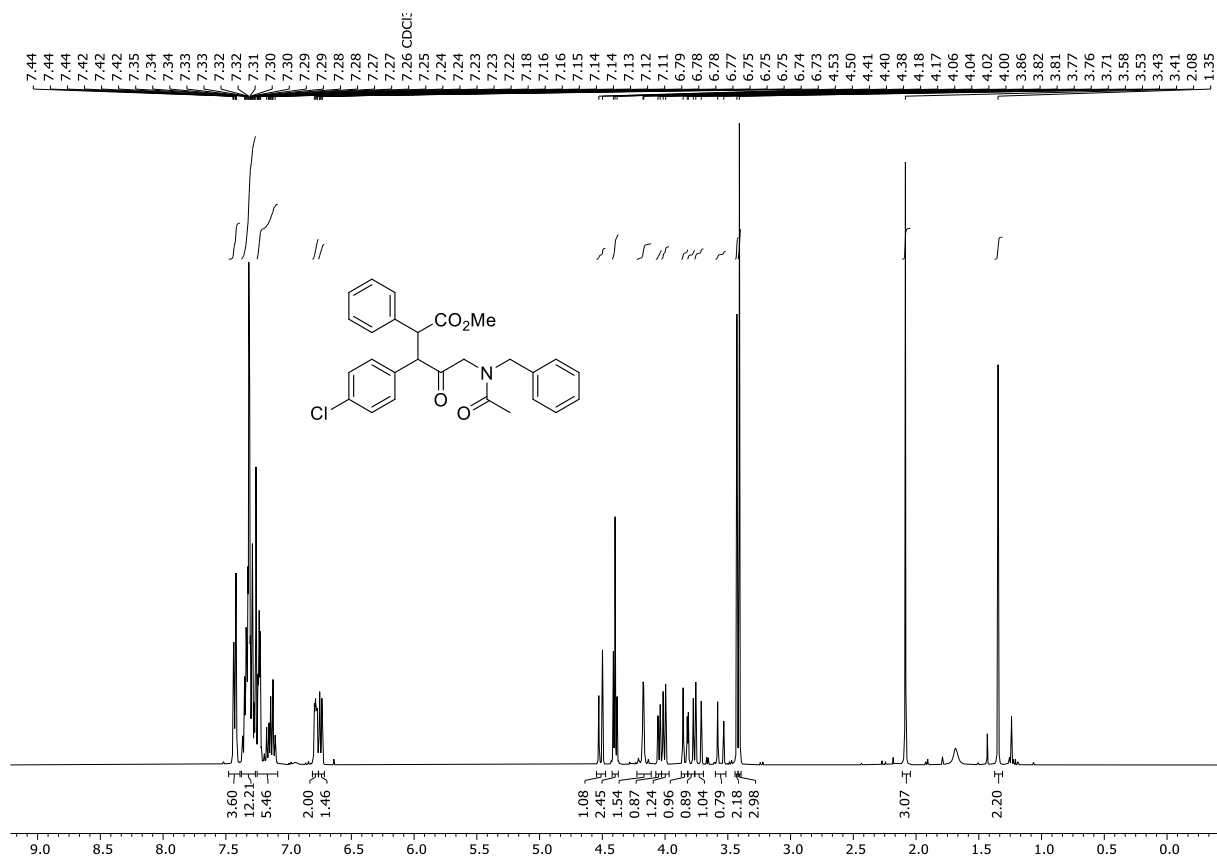

<sup>13</sup>C NMR Spectrum of 13 (101 MHz, CDCl<sub>3</sub>)

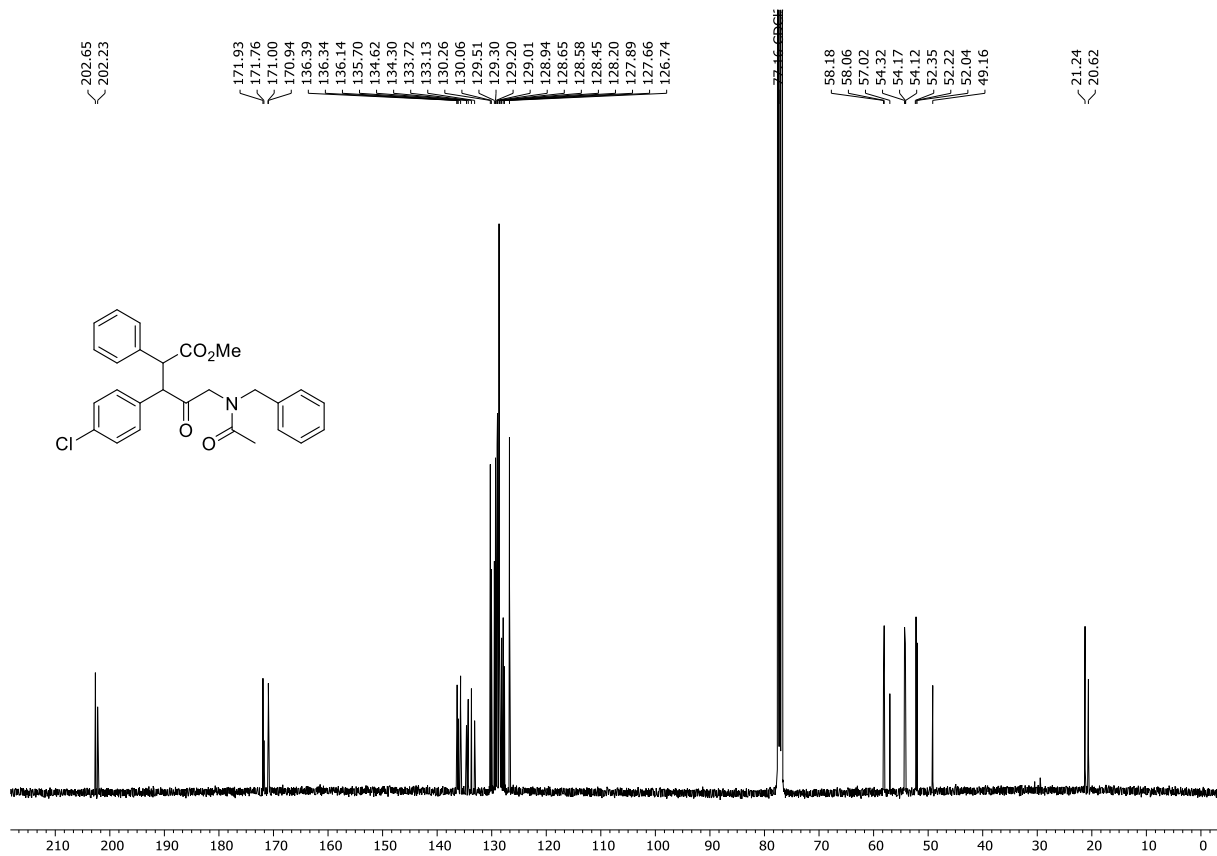

**<sup>1</sup>H NMR Spectrum of 14 (400 MHz, CDCl<sub>3</sub>)**

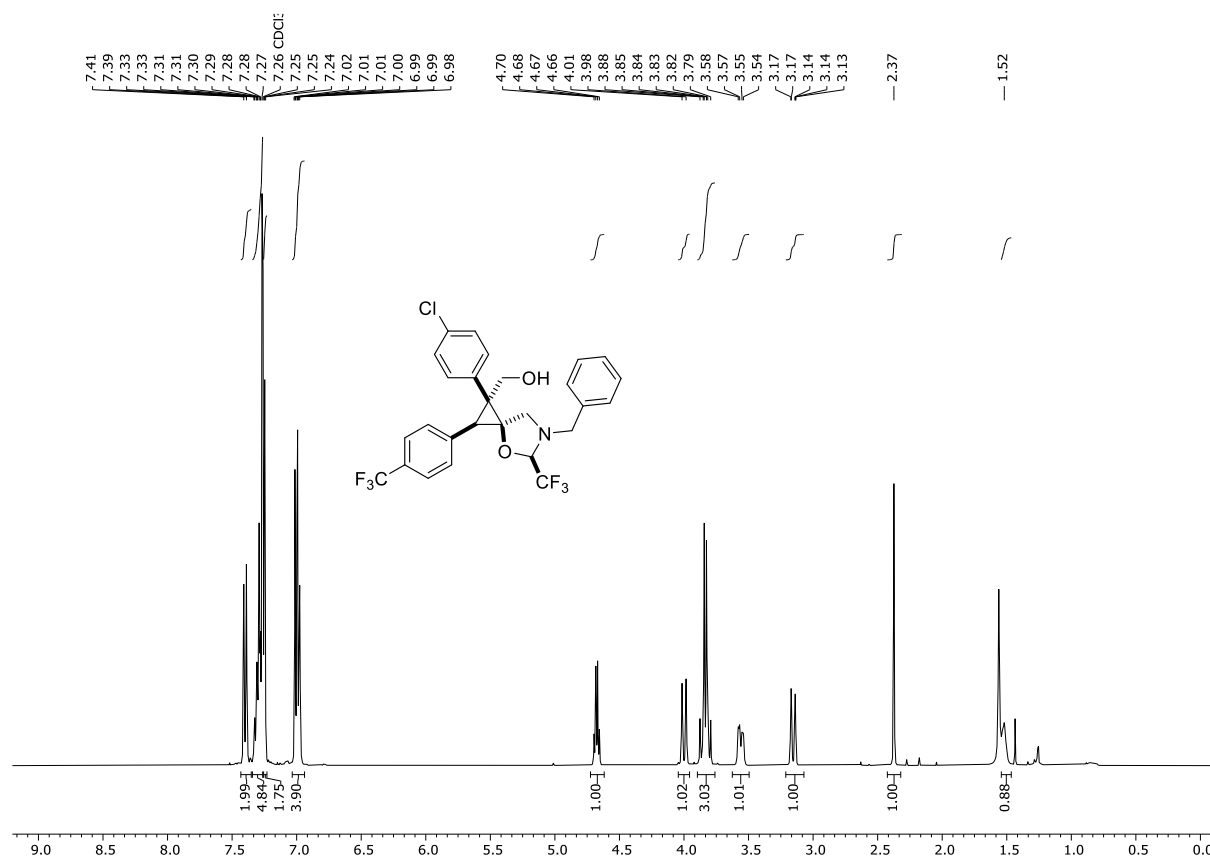

**<sup>13</sup>C NMR Spectrum of 14 (101 MHz, CDCl<sub>3</sub>)**

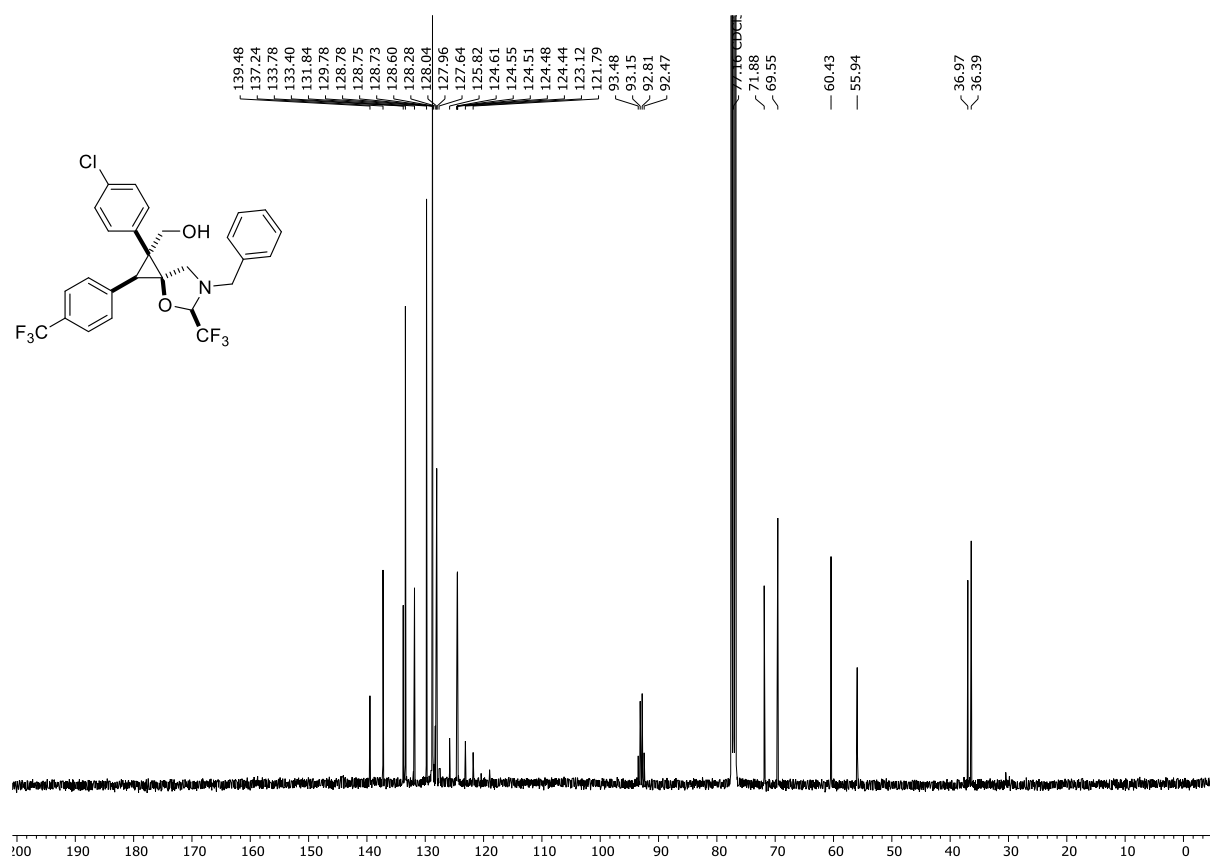

**$^{19}\text{F}$  NMR Spectrum of 14 (376 MHz,  $\text{CDCl}_3$ )**

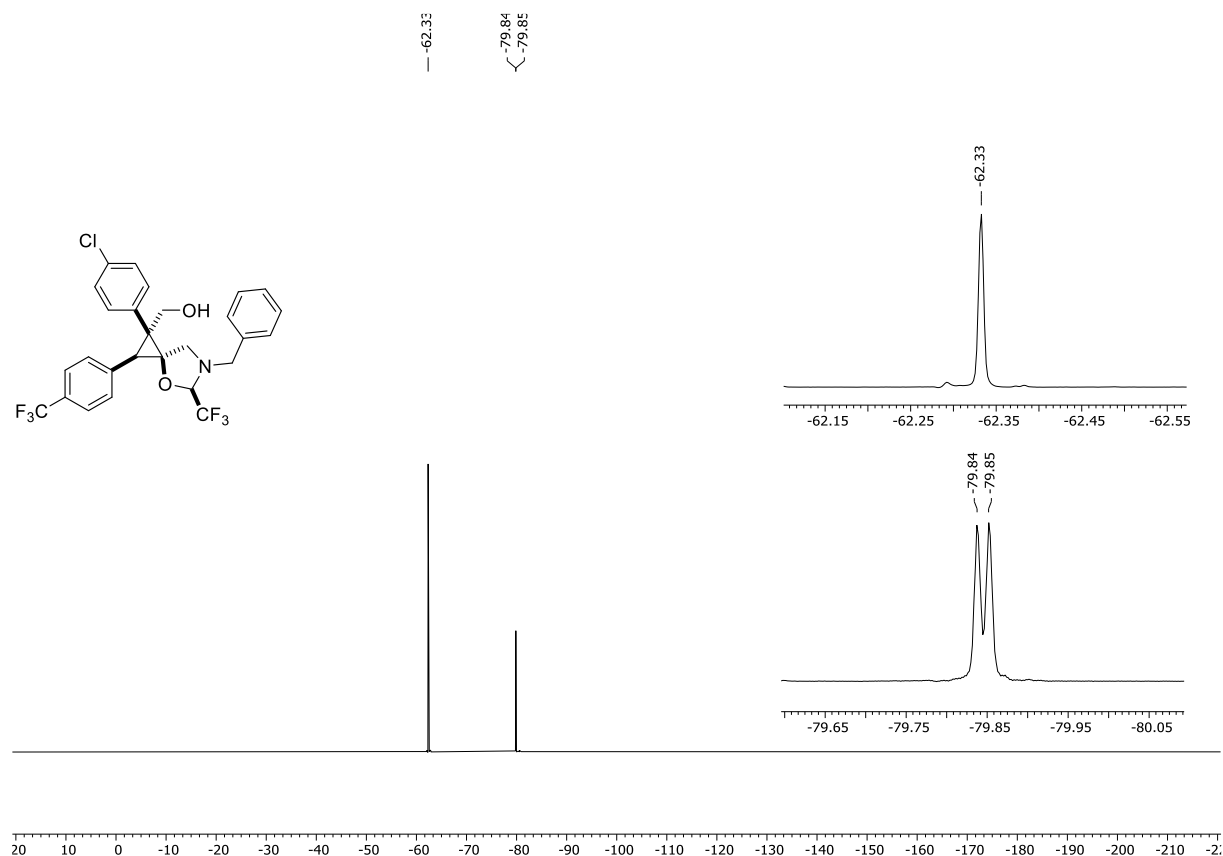

**$^1\text{H}$  NMR Spectrum of 15 (400 MHz,  $\text{CDCl}_3$ )**

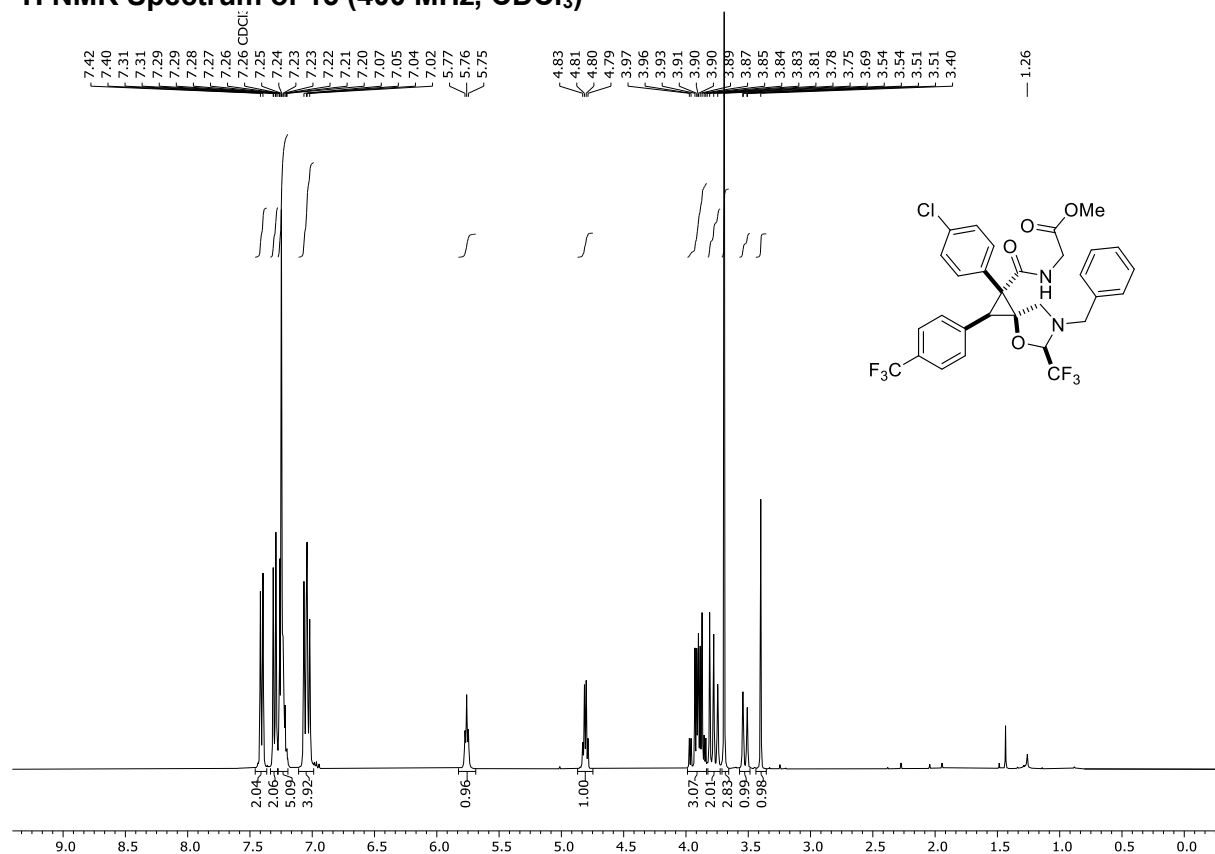

**$^{13}\text{C}$  NMR Spectrum of 15 (101 MHz,  $\text{CDCl}_3$ )**

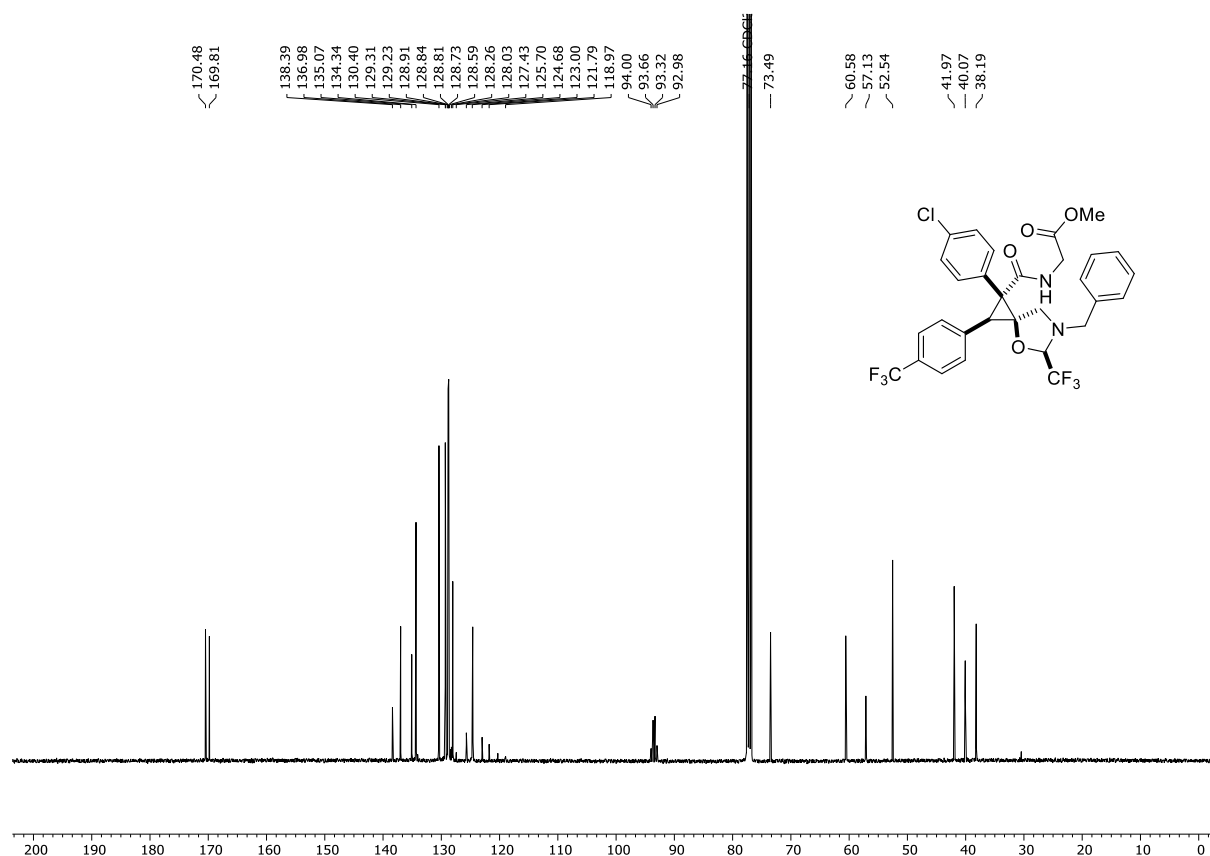

**$^{19}\text{F}$  NMR Spectrum of 15 (376 MHz,  $\text{CDCl}_3$ )**

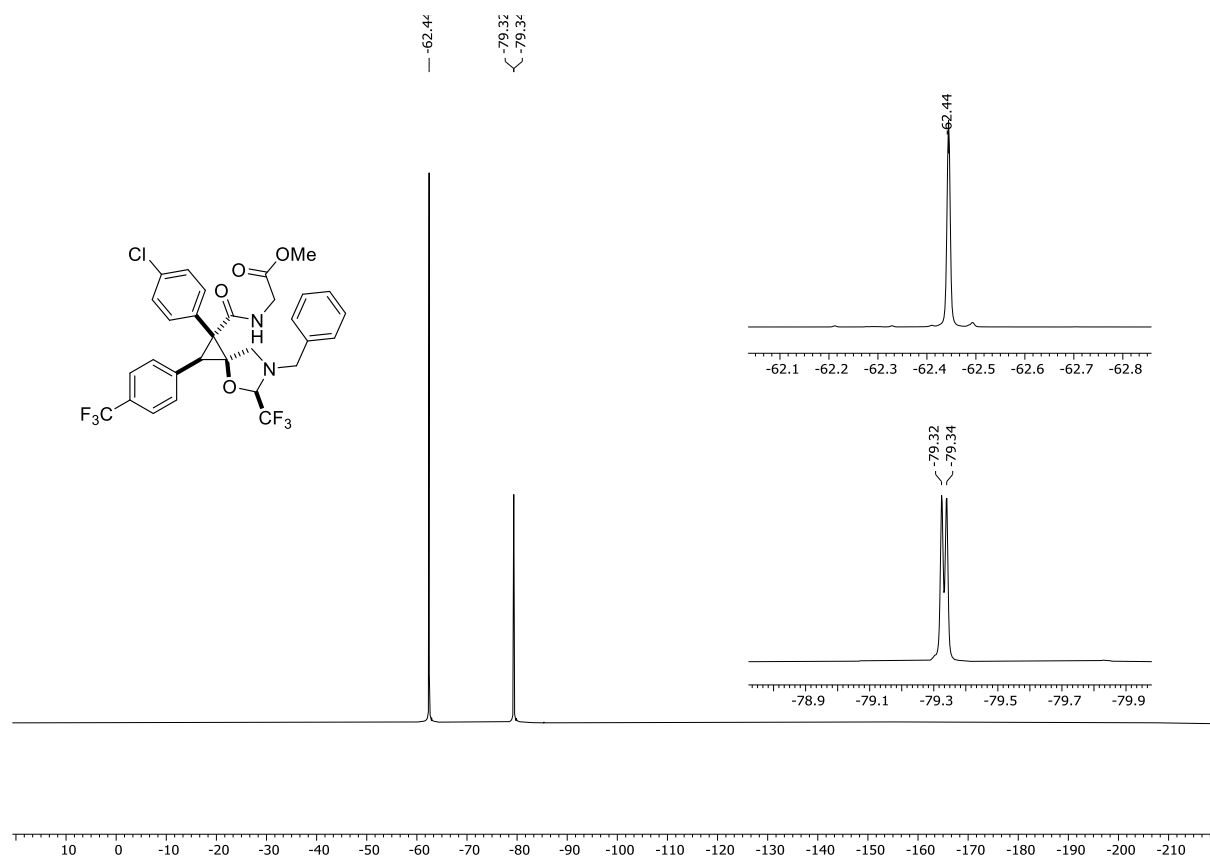

**<sup>1</sup>H NMR Spectrum of 16a (400 MHz, CDCl<sub>3</sub>)**

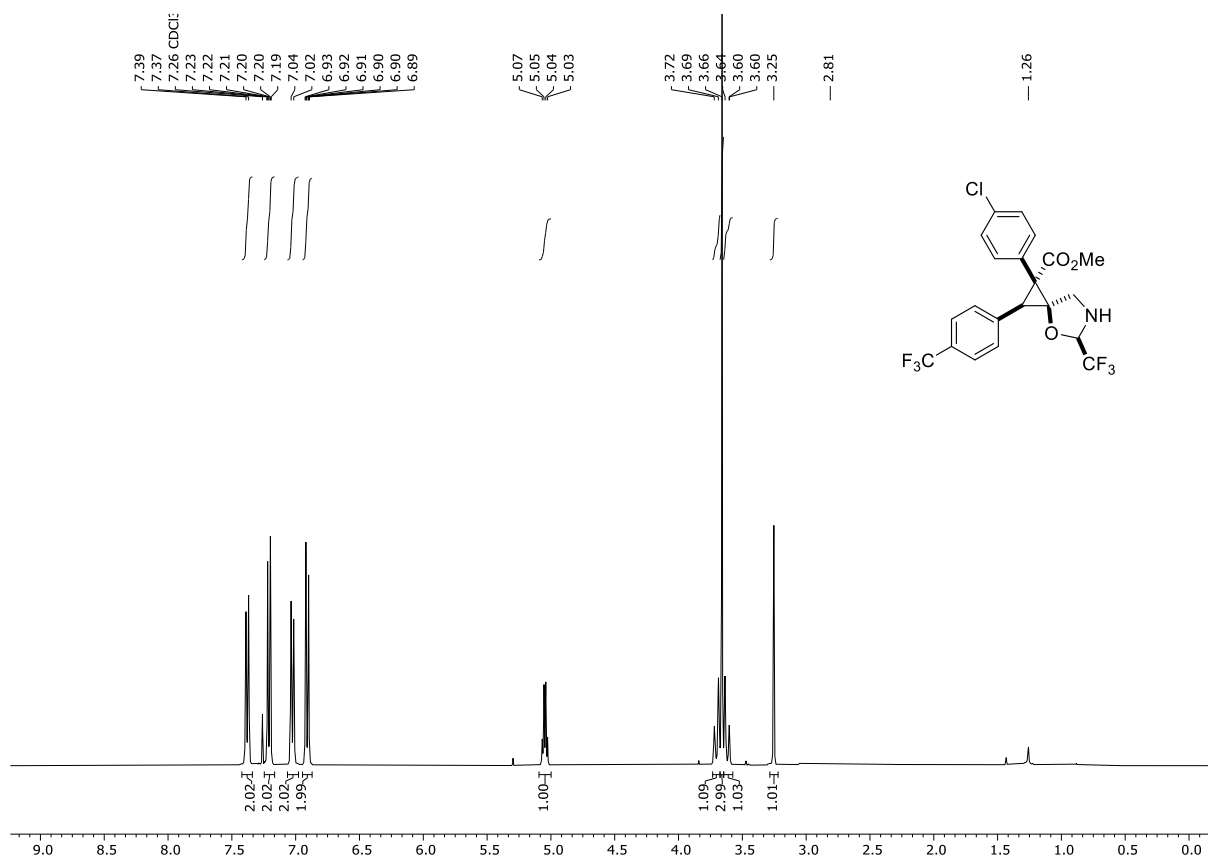

**<sup>13</sup>C NMR Spectrum of 16a (101 MHz, CDCl<sub>3</sub>)**

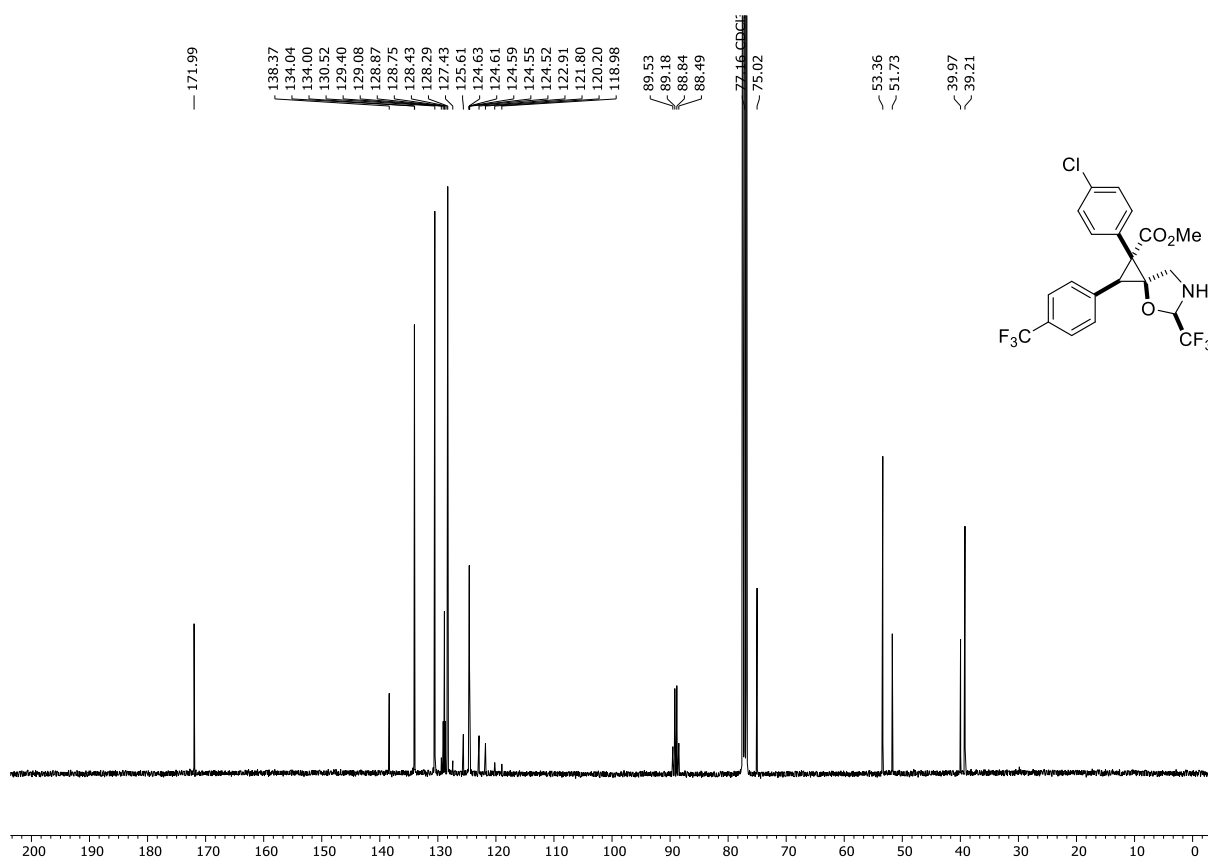

**$^{19}\text{F}$  NMR Spectrum of 16a (376 MHz,  $\text{CDCl}_3$ )**

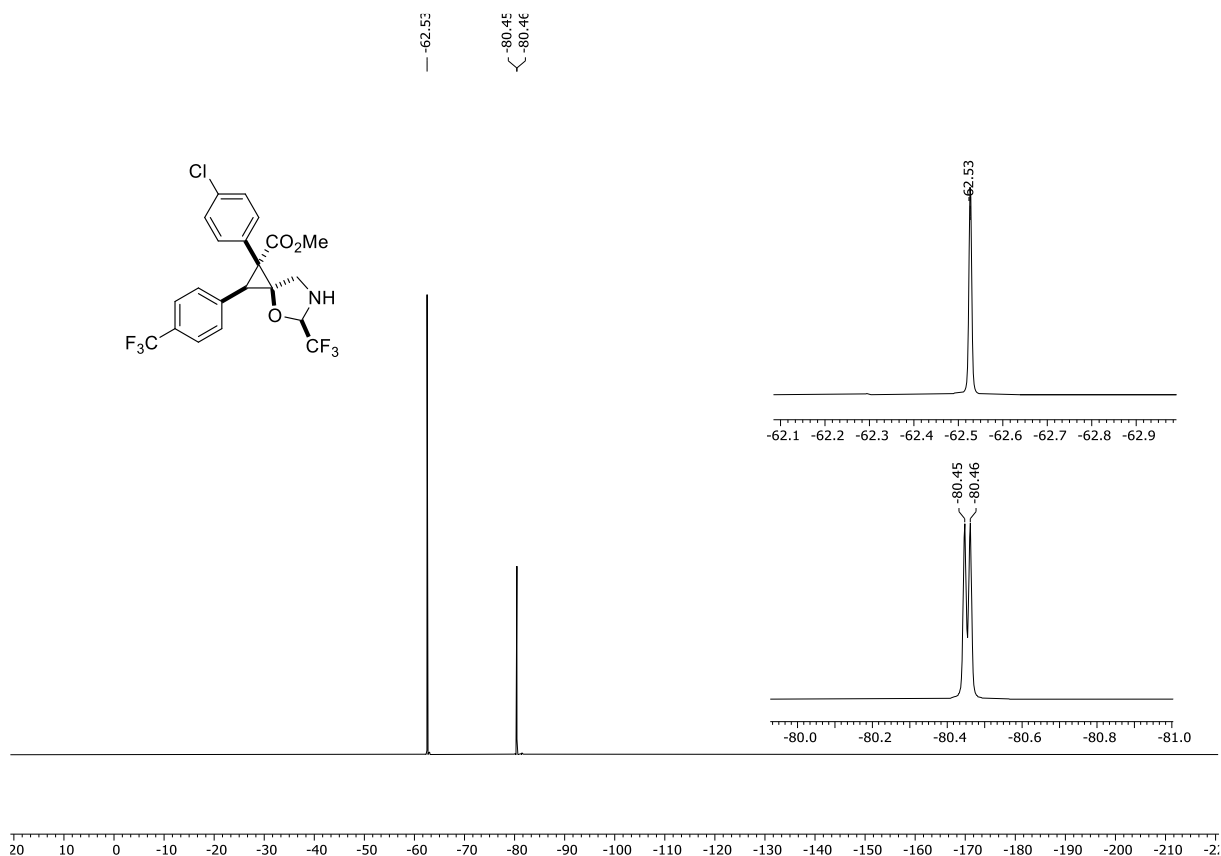

**$^1\text{H}$  NMR Spectrum of 16b (400 MHz,  $\text{CDCl}_3$ )**

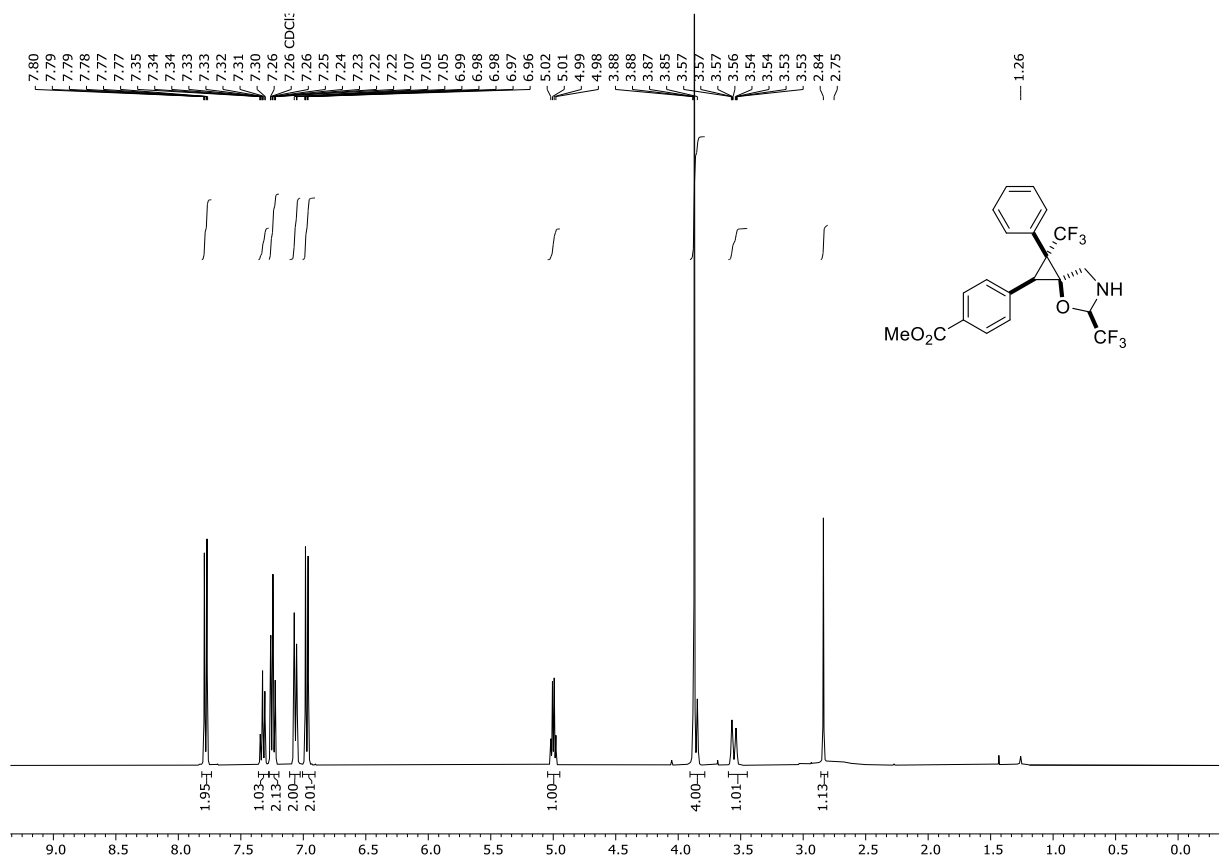

**$^{13}\text{C}$  NMR Spectrum of 16b (101 MHz,  $\text{CDCl}_3$ )**

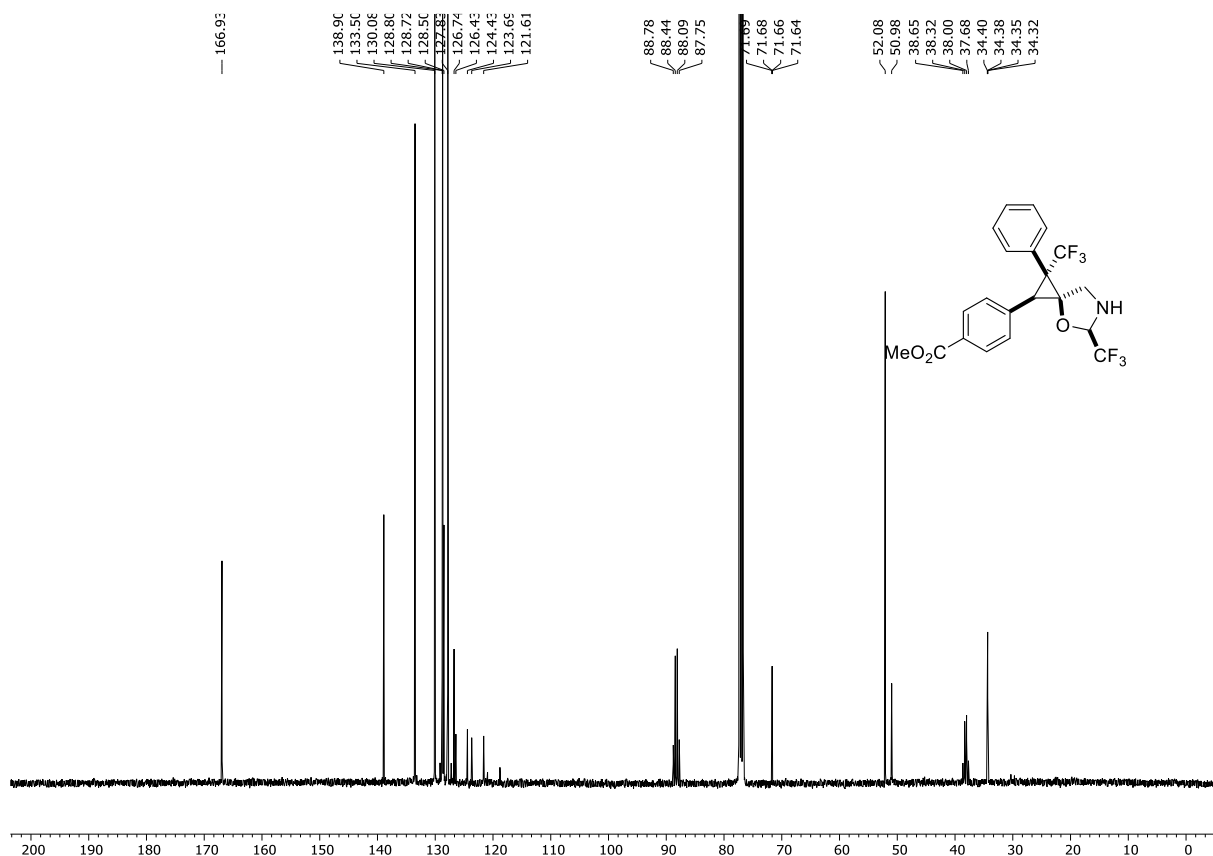

**$^{19}\text{F}$  NMR Spectrum of 16b (376 MHz,  $\text{CDCl}_3$ )**

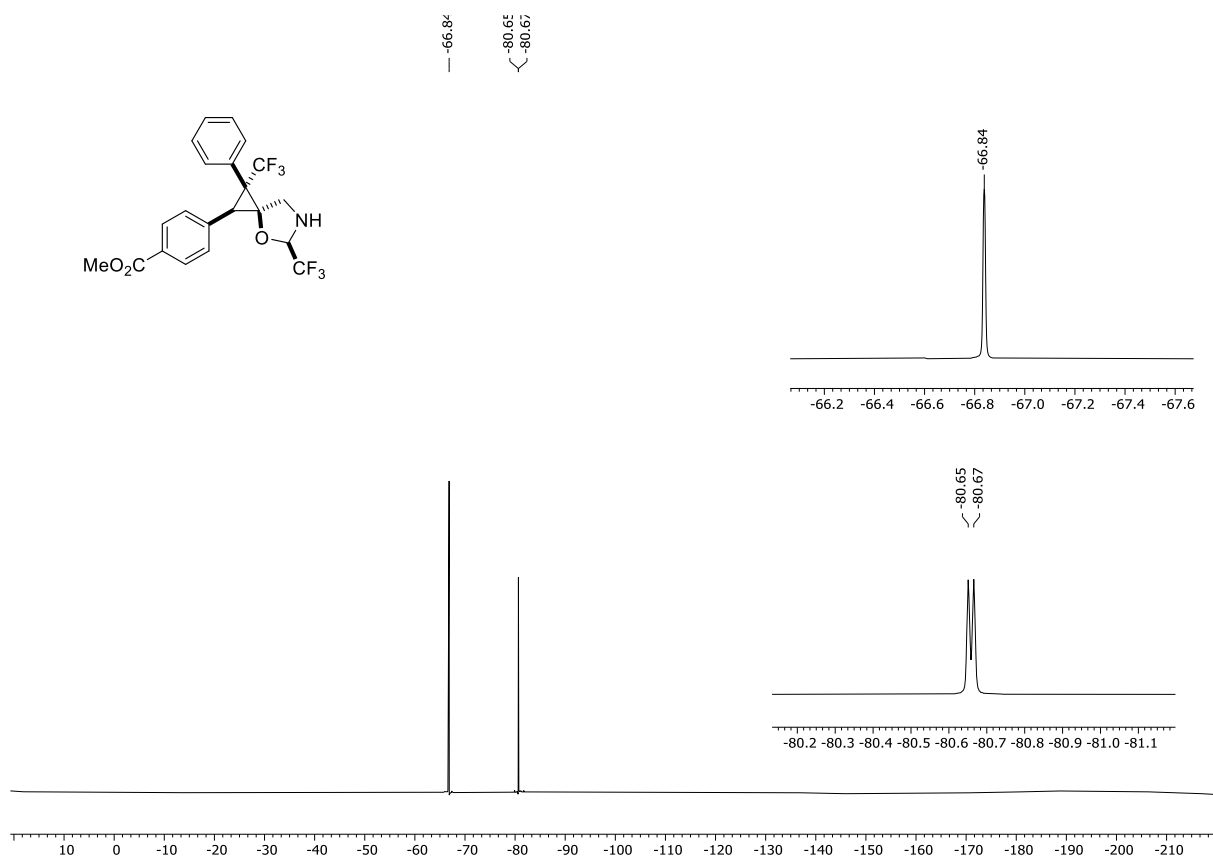



# HPLC Traces

## Methyl 2-((benzylamino)methyl)-1-phenylcycloprop-2-ene-1-carboxylate (*rac*)-3a

Chiral HPLC Daicel Chiralpak IB N-5 column: 80:20 hexane/IPA, flow rate 1 mL/min,  $\lambda$  = 254 nm

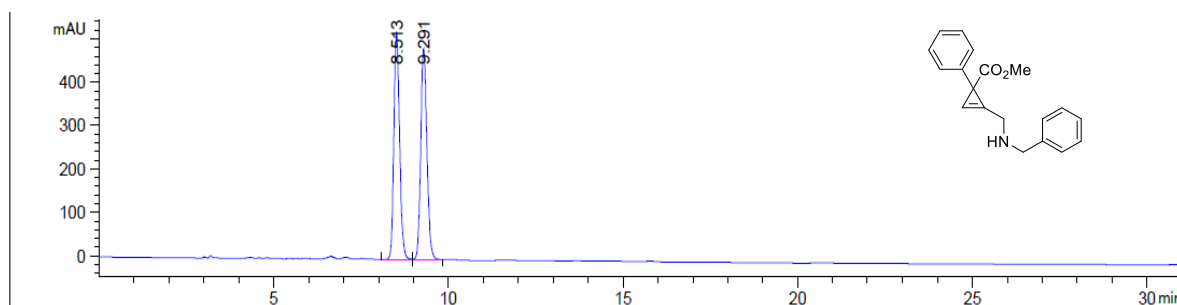

Signal 3: DAD1 C, Sig=214,4 Ref=360,100

| Peak # | RetTime [min] | Type | Width [min] | Area [mAU*s] | Height [mAU] | Area %  |
|--------|---------------|------|-------------|--------------|--------------|---------|
| 1      | 8.513         | BB   | 0.1742      | 5961.85791   | 526.12244    | 50.0003 |
| 2      | 9.291         | BB   | 0.1893      | 5961.78467   | 485.47464    | 49.9997 |

## Methyl 2-((benzylamino)methyl)-1-phenylcycloprop-2-ene-1-carboxylate (+)-3a

Chiral HPLC Daicel Chiralpak IB N-5 column: 80:20 hexane/IPA, flow rate 1 mL/min,  $\lambda$  = 254 nm

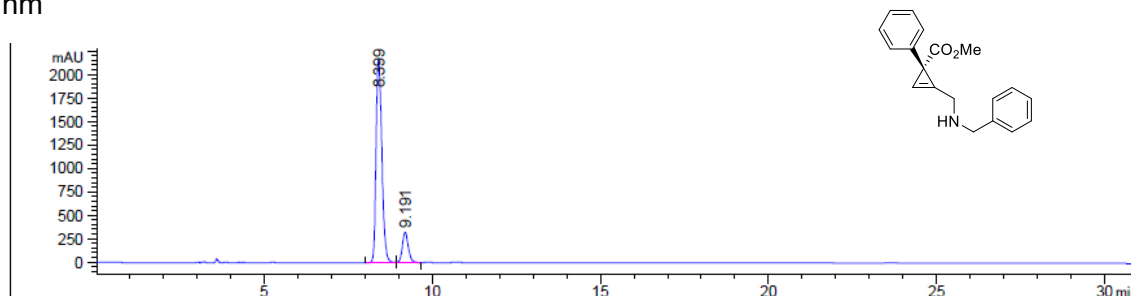

Signal 3: DAD1 C, Sig=214,4 Ref=360,100

| Peak # | RetTime [min] | Type | Width [min] | Area [mAU*s] | Height [mAU] | Area %  |
|--------|---------------|------|-------------|--------------|--------------|---------|
| 1      | 8.399         | BV   | 0.1884      | 2.60819e4    | 2167.81714   | 86.8593 |
| 2      | 9.191         | VB   | 0.1867      | 3945.87305   | 322.54572    | 13.1407 |

## Methyl 6-benzyl-1-phenyl-5-(trifluoromethyl)-2-(4-(trifluoromethyl)phenyl)-4-oxa-6-azaspiro[2.4]heptane-1-carboxylate (*rac*)-3a

Chiral HPLC Daicel Chiralpak IB N-5 column: 99:1 hexane/IPA, flow rate 1 mL/min,  $\lambda$  = 254 nm

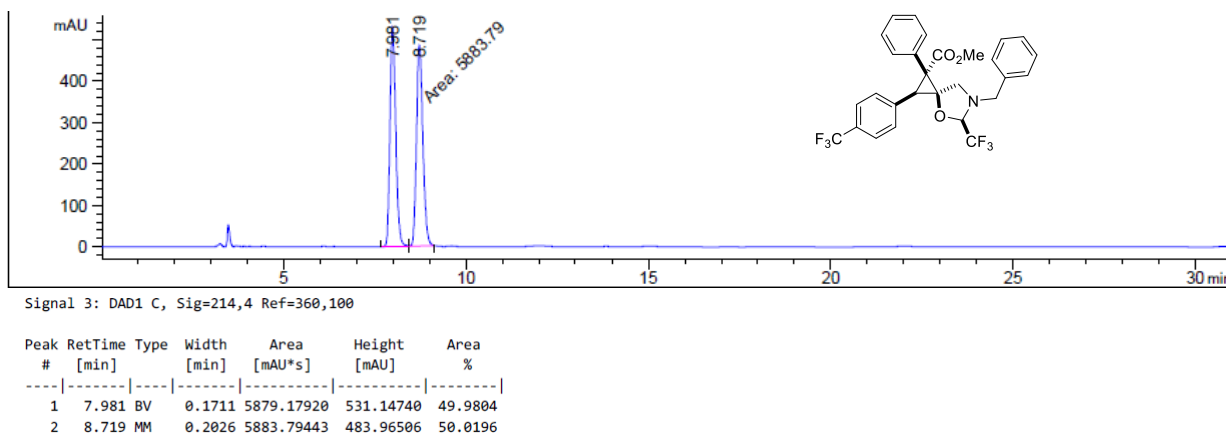

**Methyl 6-benzyl-1-phenyl-5-(trifluoromethyl)-2-(4-(trifluoromethyl)phenyl)-4-oxa-6-azaspiro[2.4]heptane-1-carboxylate (+)-6a**

Chiral HPLC Daicel Chiralpak IB N-5 column: 99:1 hexane/IPA, flow rate 1 mL/min,  $\lambda = 254$  nm

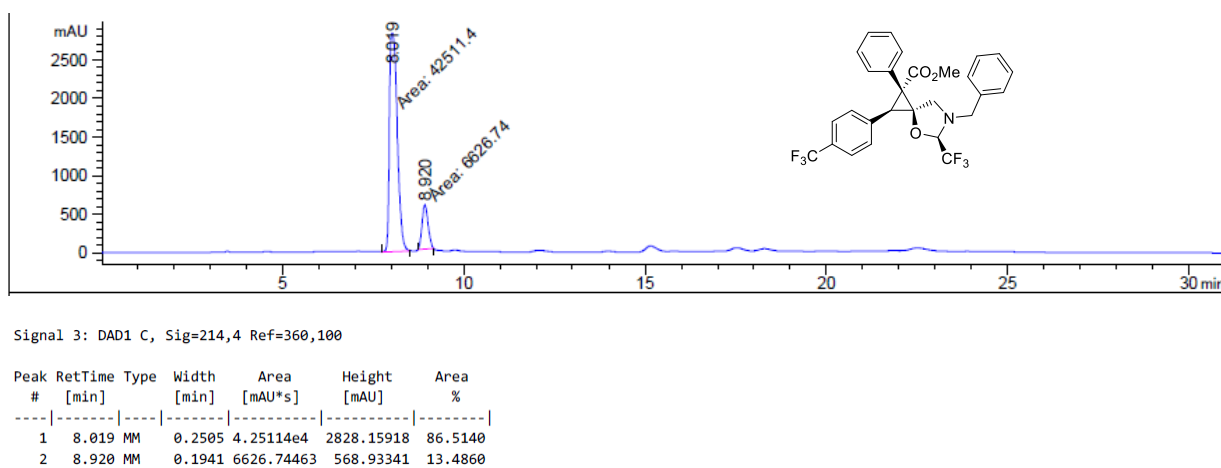

Supplement: d5sc09351a1.pdf [file d5sc09351a1.pdf]
